# Supplementary material
Source: PubMed Central journal article supplement (PMC4724341)
Supplement: NIHMS739303-supplement-3.pdf [file NIHMS739303-supplement-3.pdf]

SFig. 3-1 a

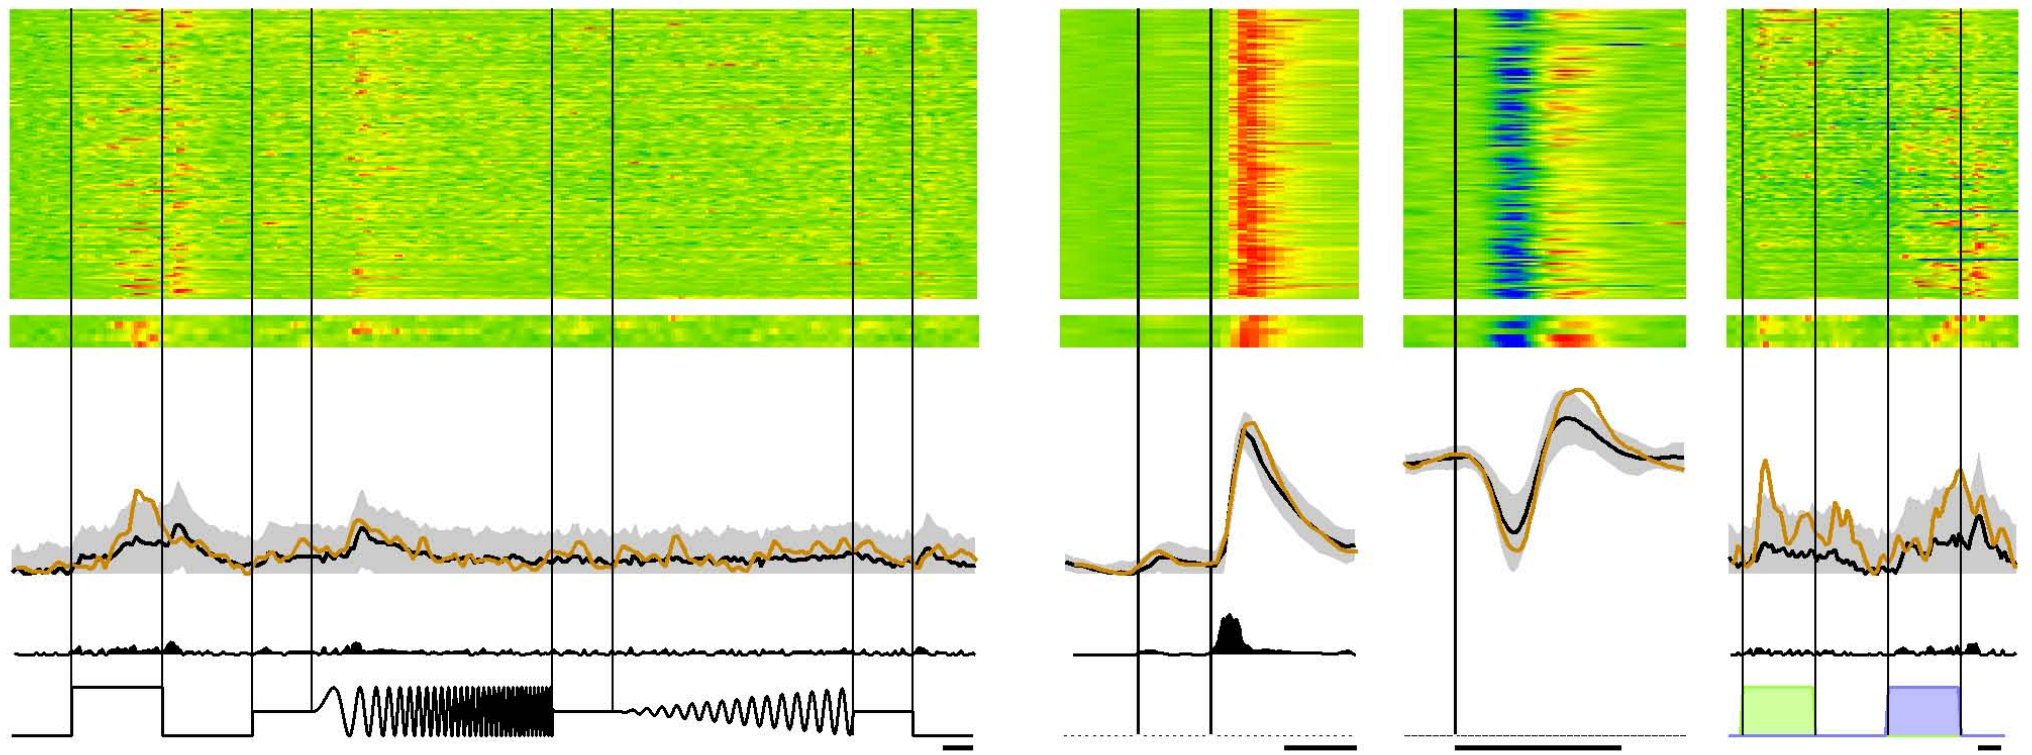

b

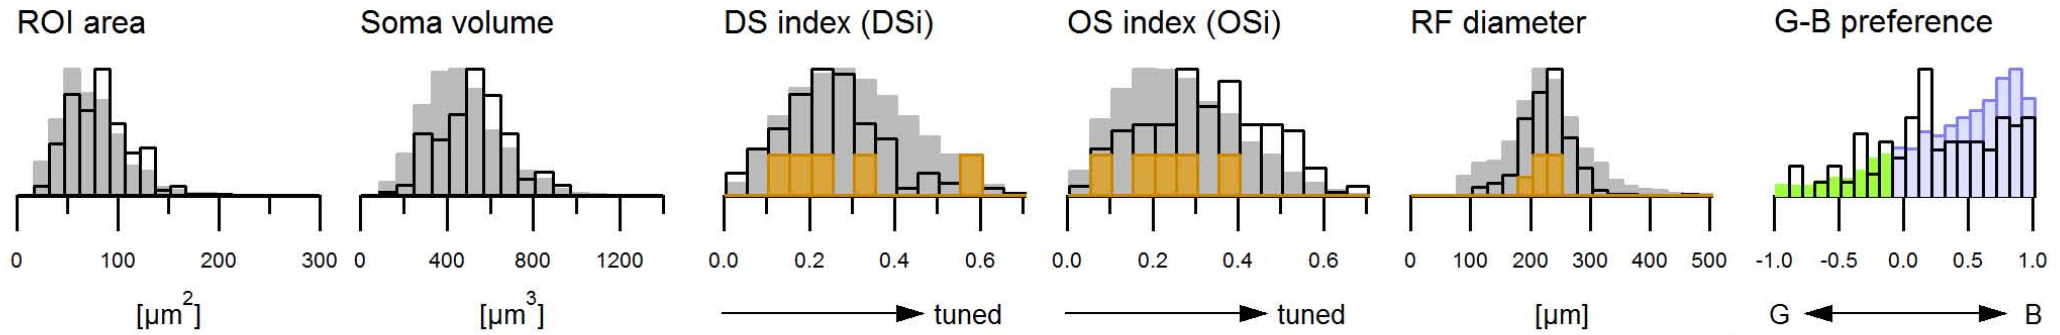

c

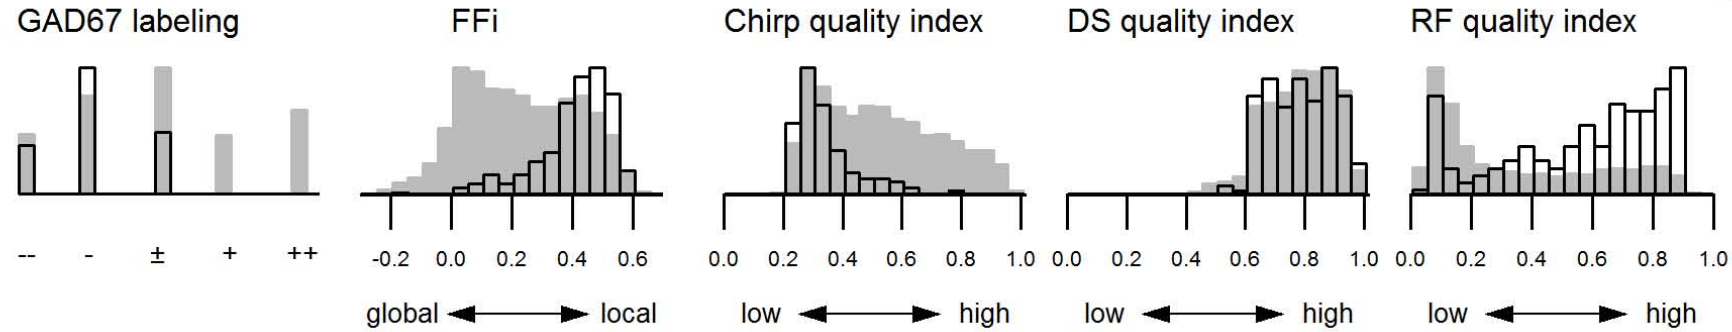

d

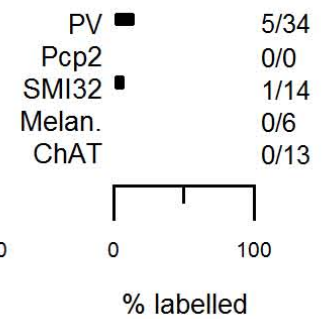

**Group 1** OFF local, OS

n = 143 Cells, 1.79%, (2.85% of RGCs); CF: 2.48

SFig. 3-2 a

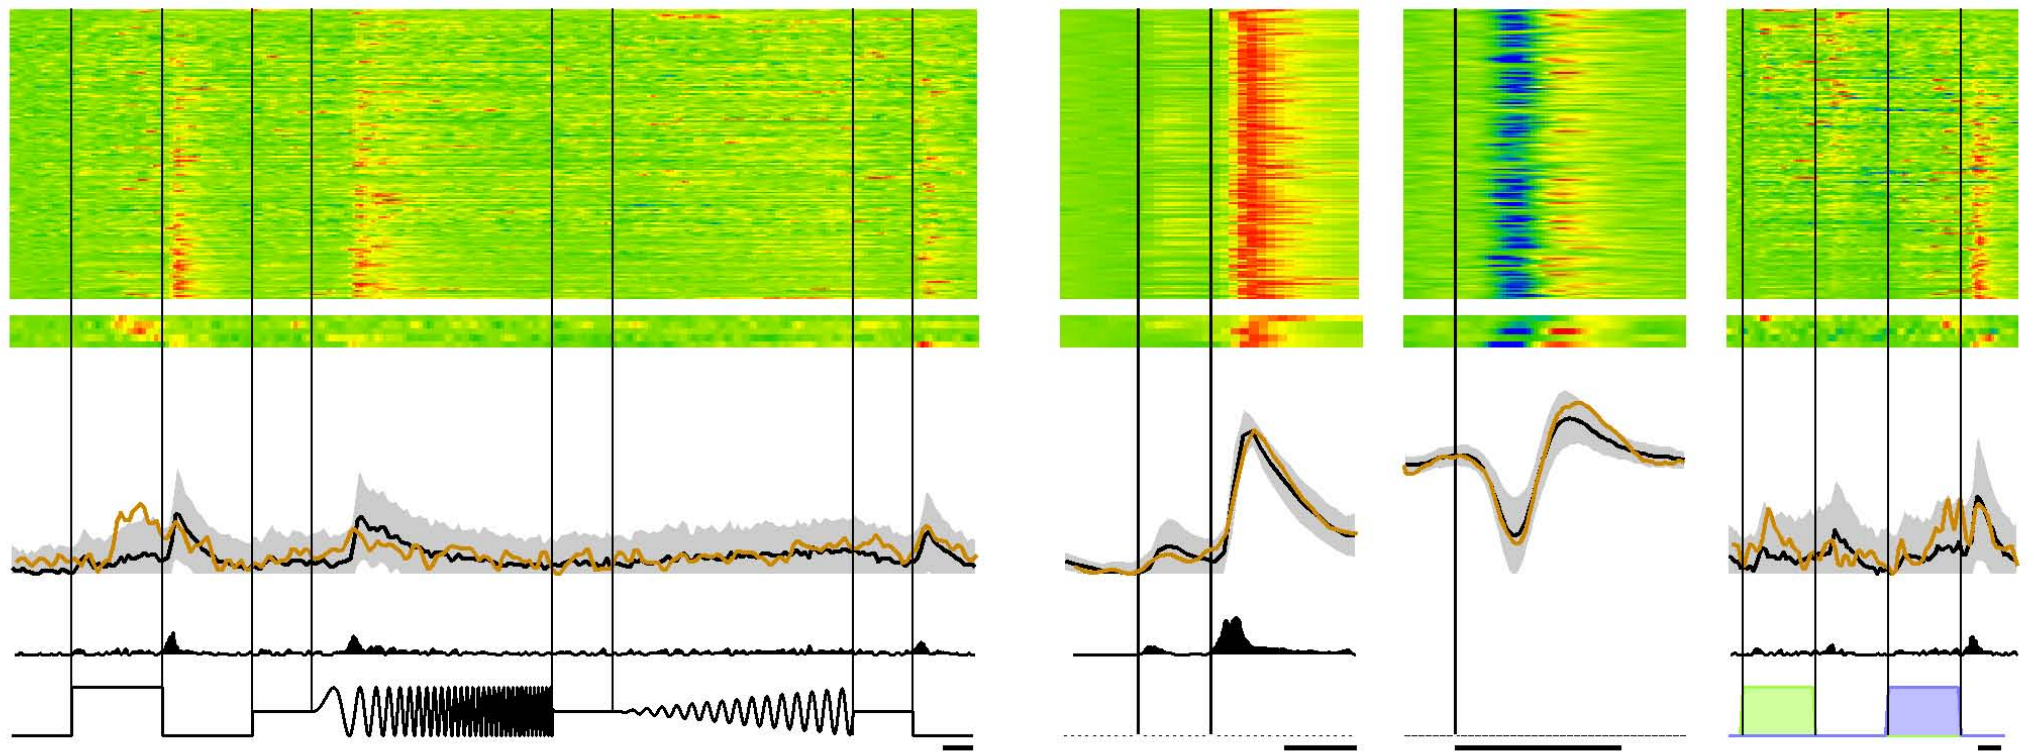

b

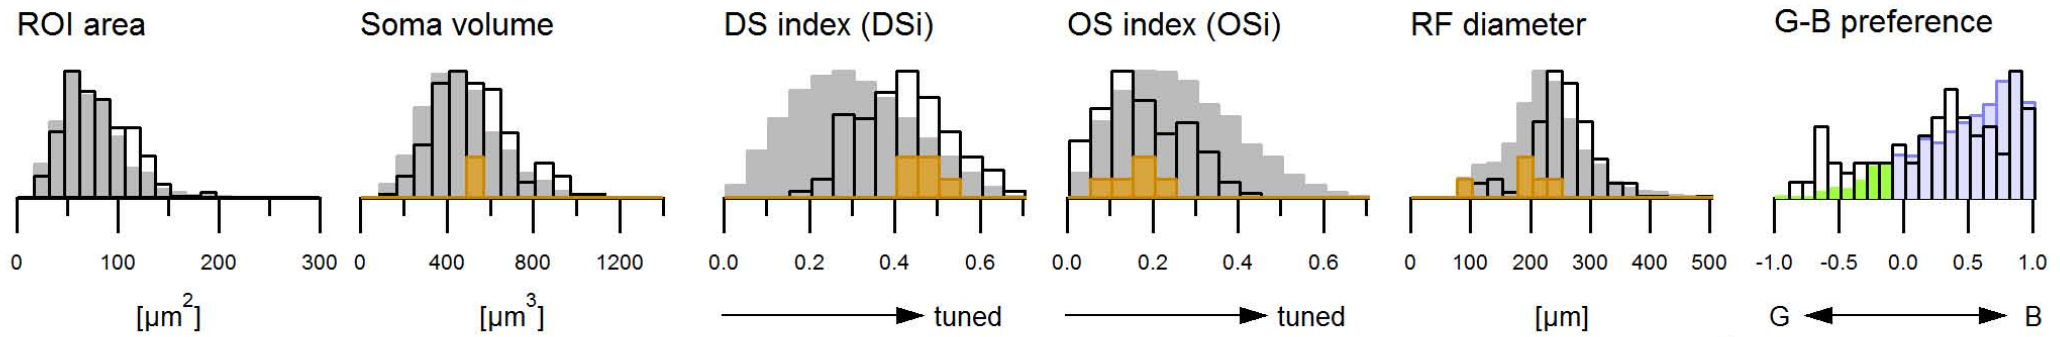

c

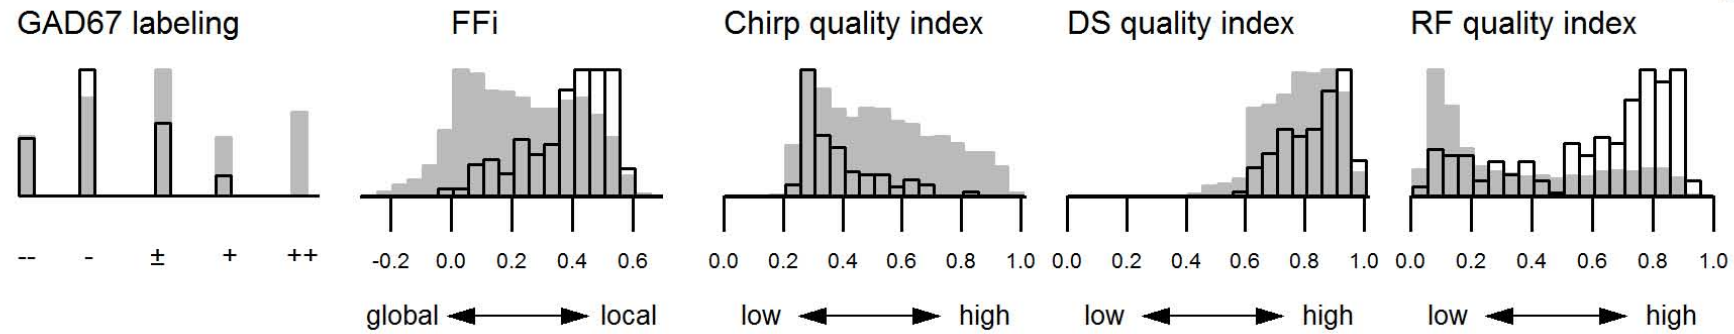

d

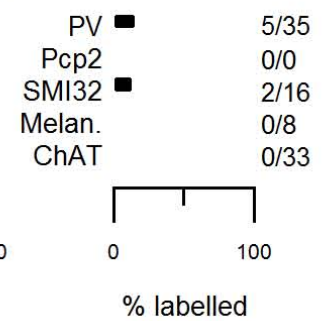

**Group 2 OFF DS**

n = 162 Cells, 2.03%, (3.22% of RGCs); CF: 3.35



SFig. 3-3 a

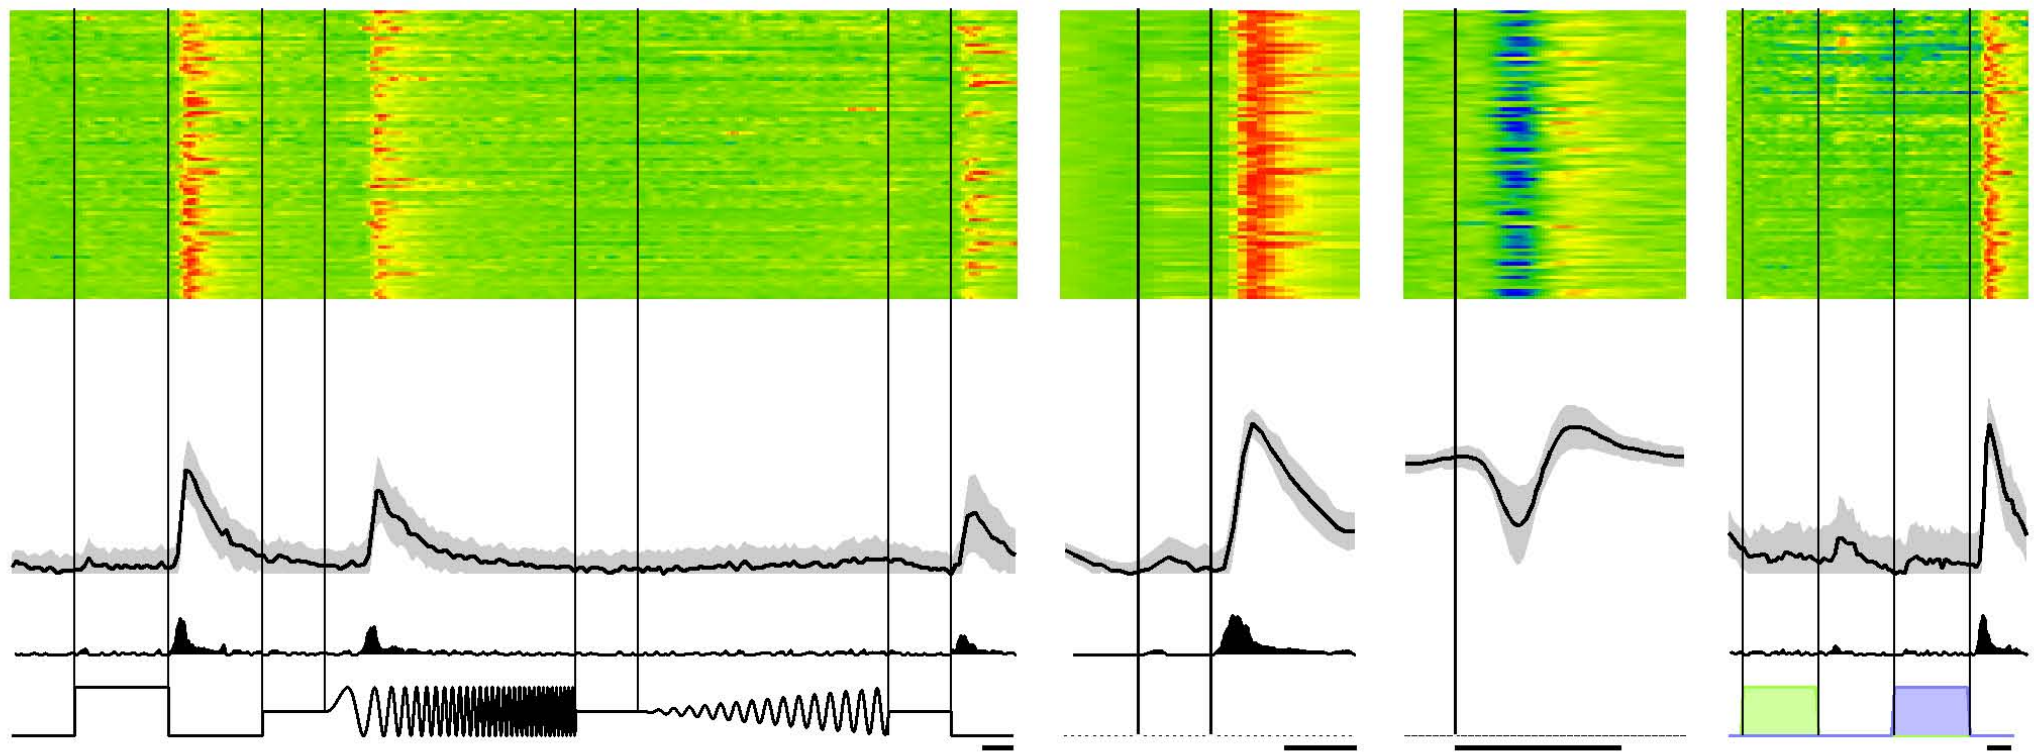

b

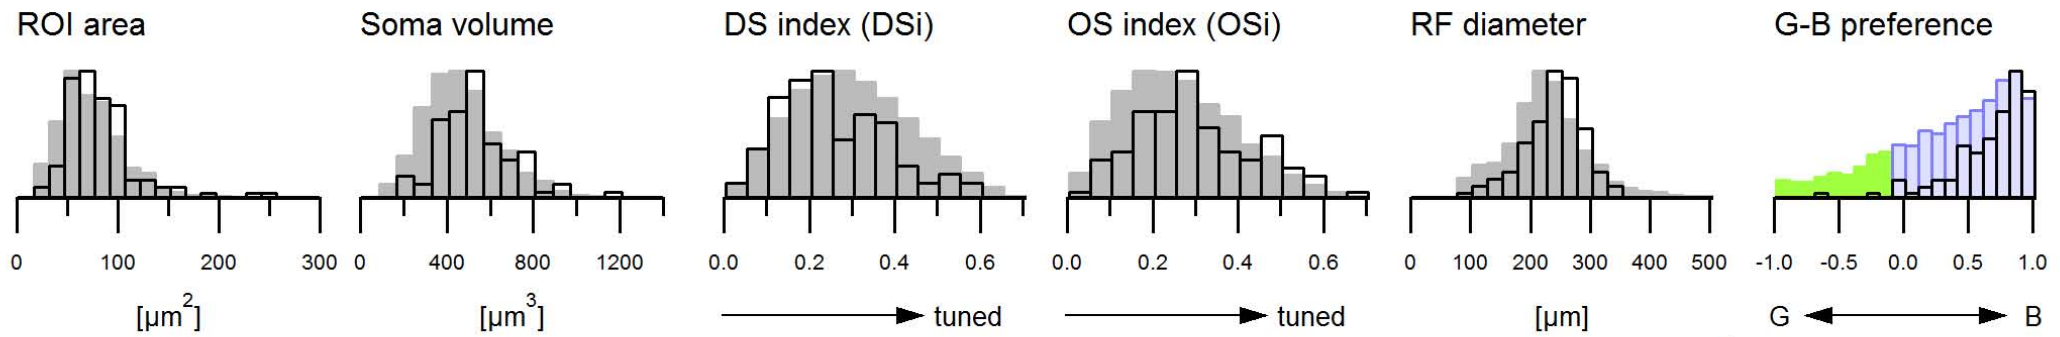

c

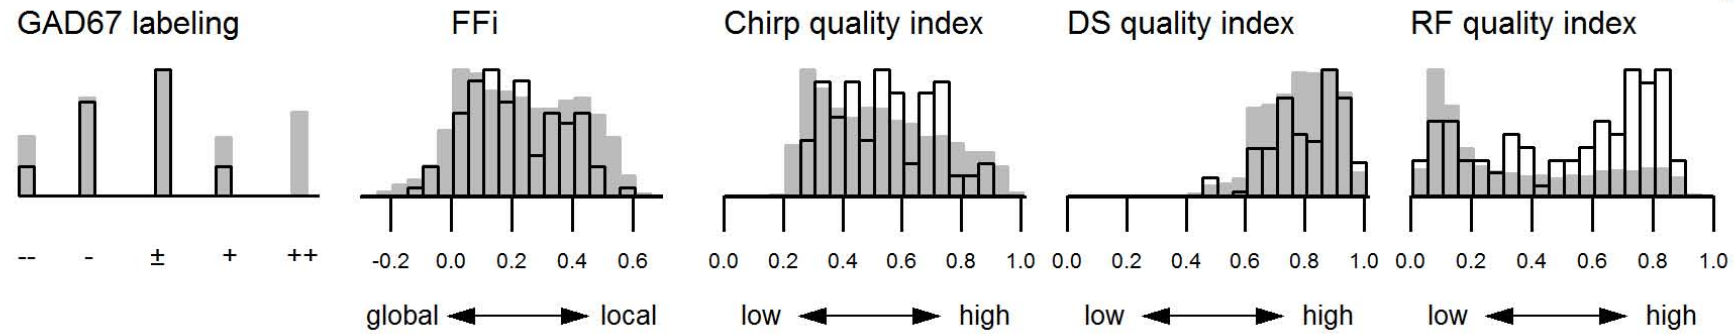

d

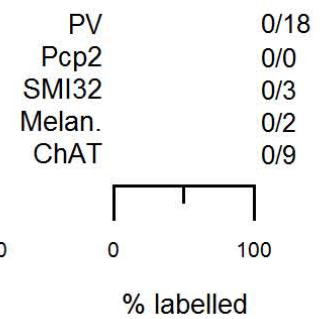

**Group 3** OFF step

n = 86 Cells, 1.08%, (1.71% of RGCs); CF: 1.64

SFig. 3-4 a

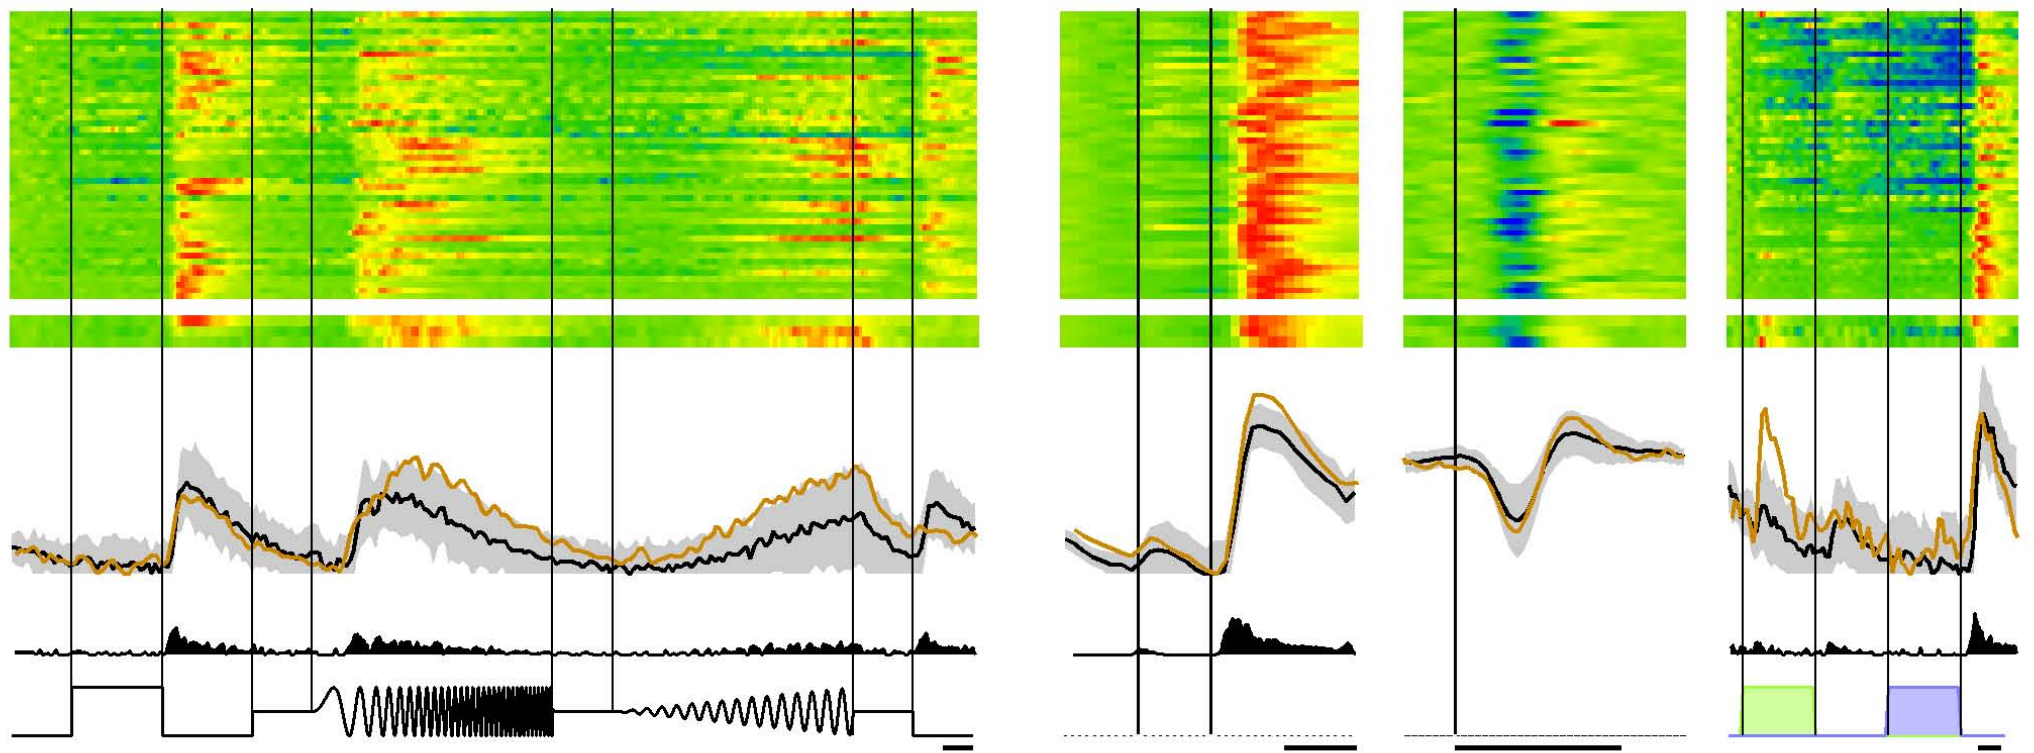

b

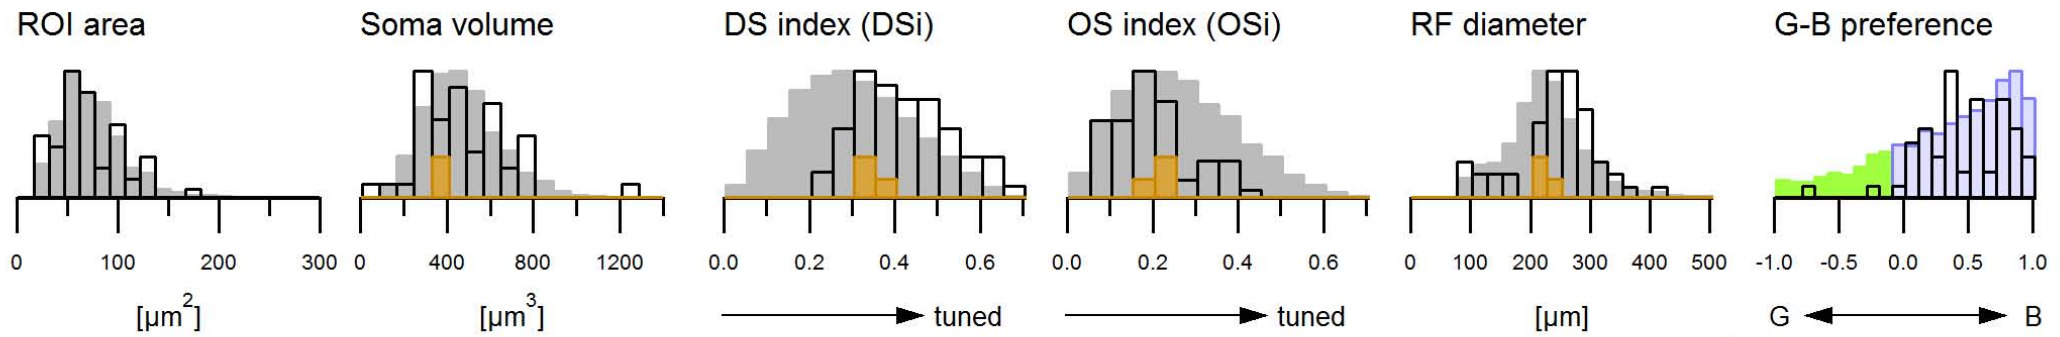

c

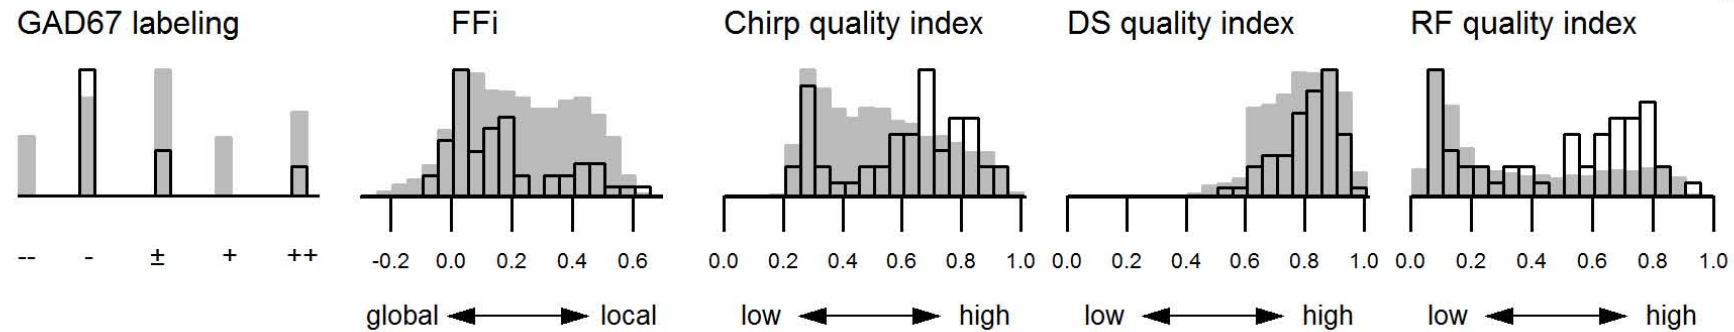

d

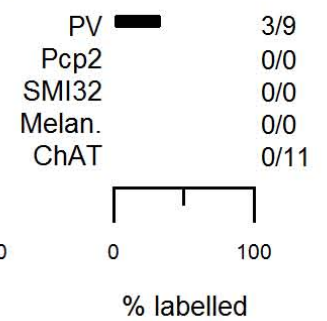

**Group 4** OFF slow (a)

n = 50 Cells, 0.63%, (1% of RGCs); CF: 1.11



SFig. 3-5 a

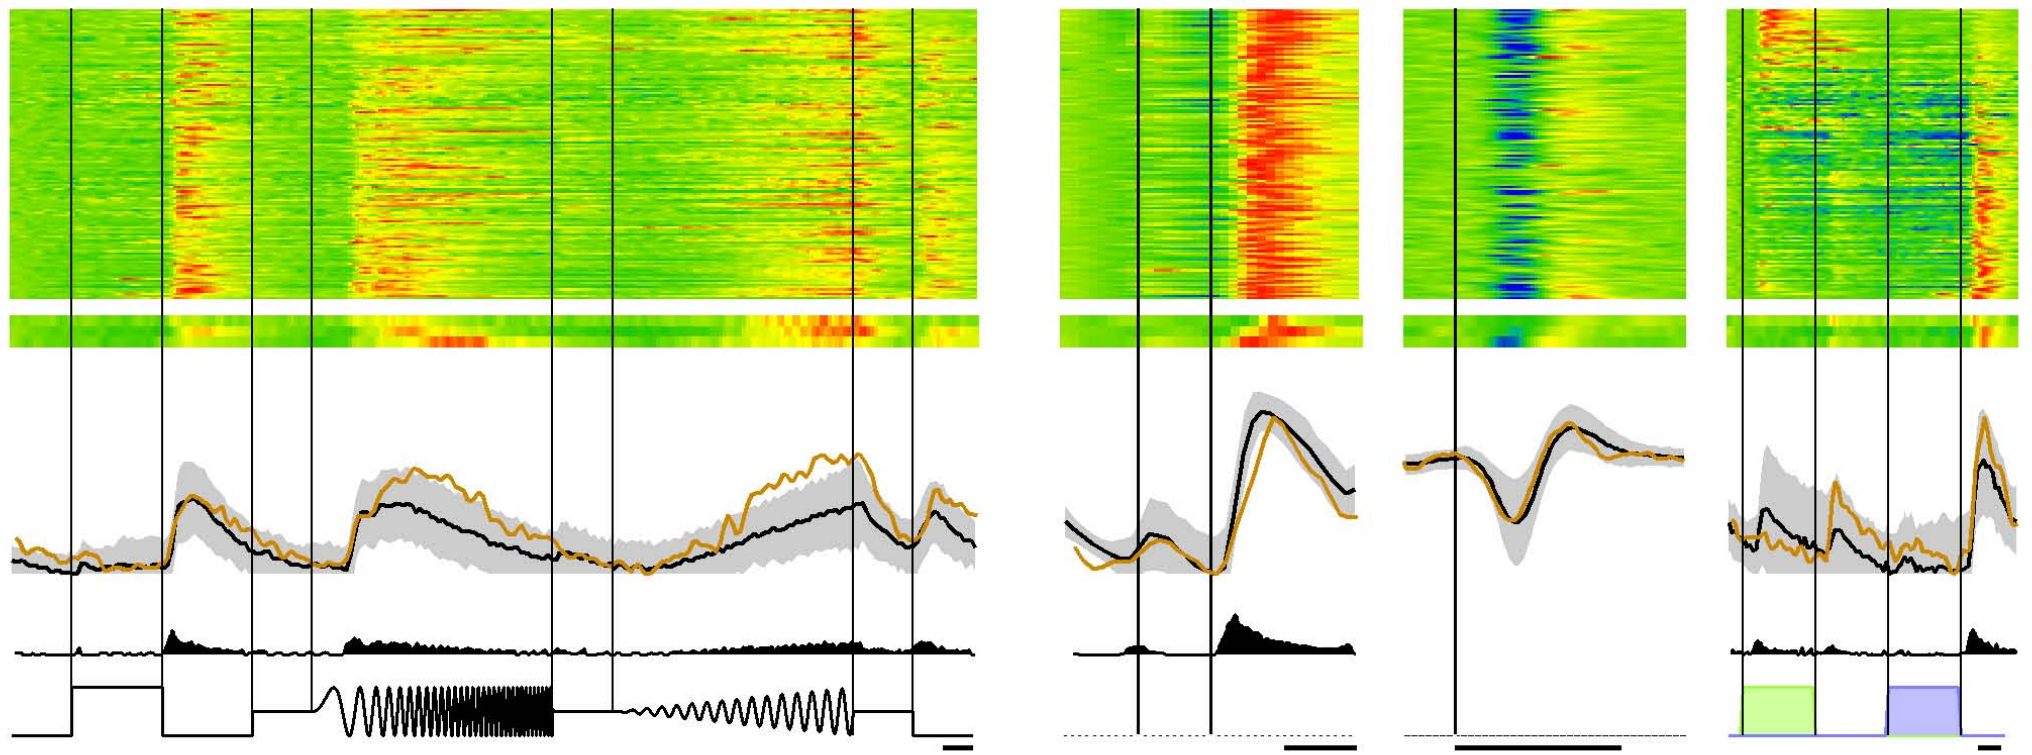

b

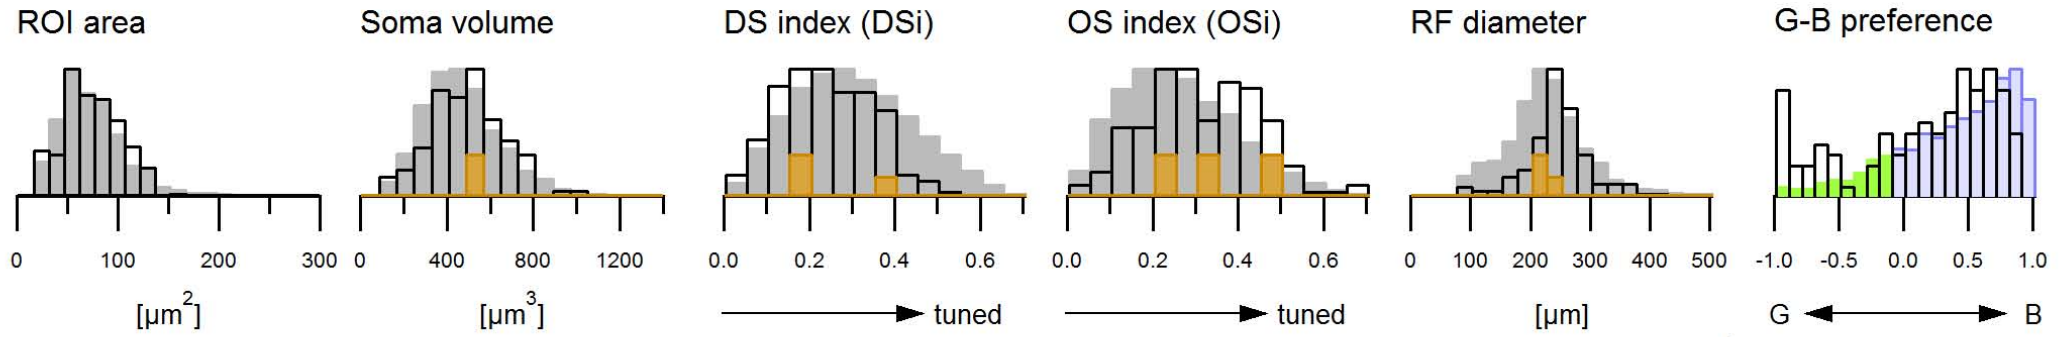

c

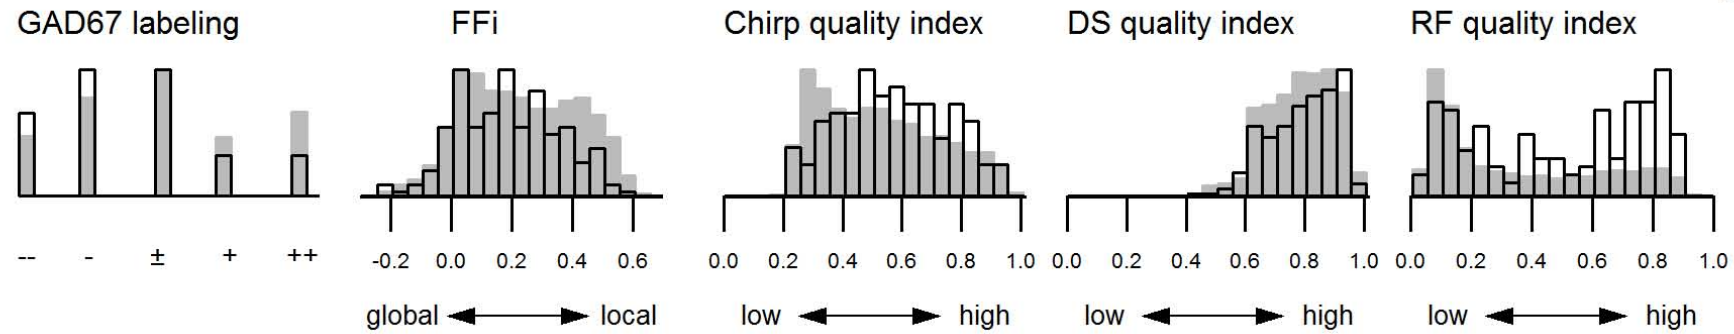

d

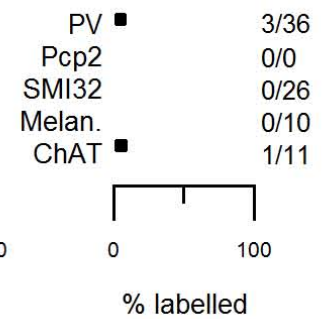

**Group 4** OFF slow (b)

n = 136 Cells, 1.7%, (2.71% of RGCs); CF: 2.68

SFig. 3-6 a

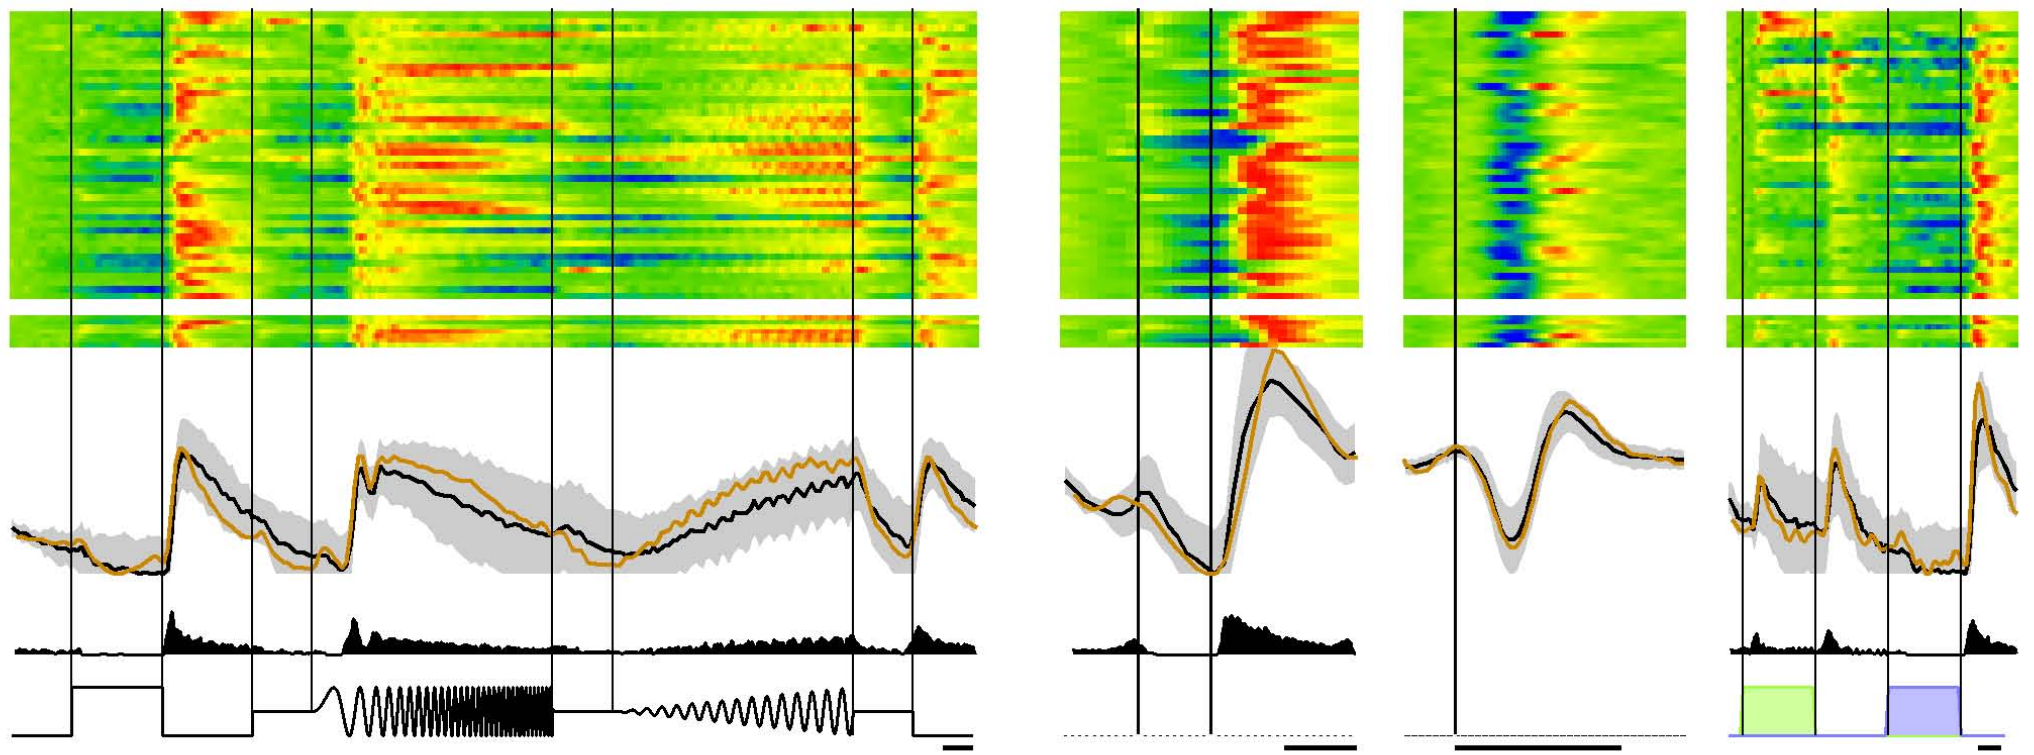

b

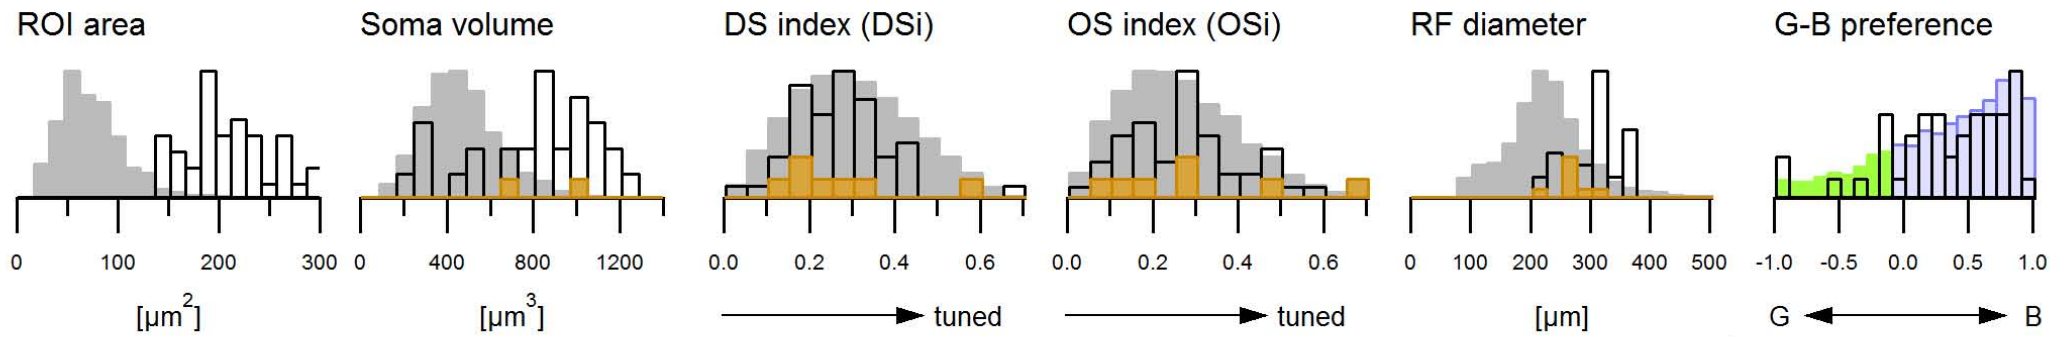

c

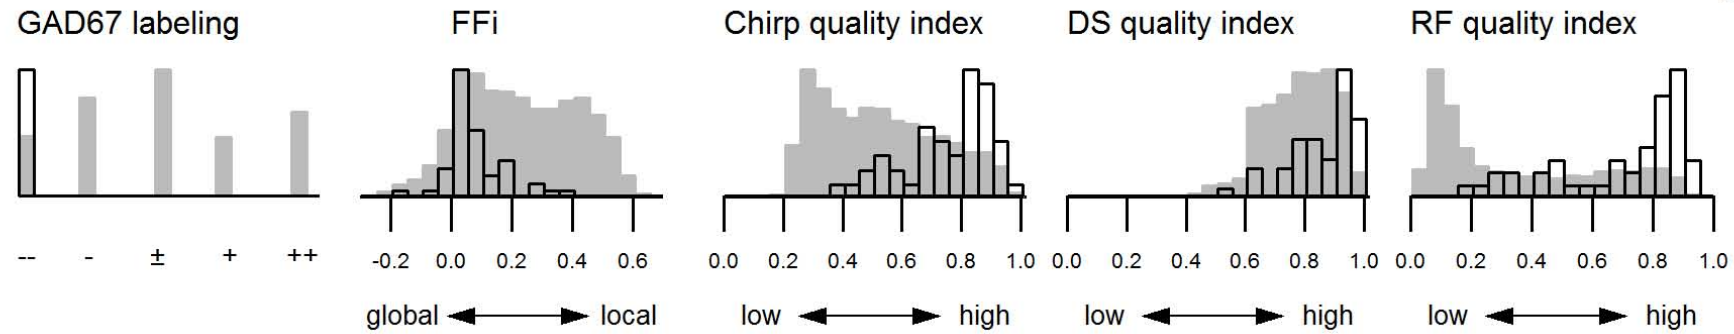

d

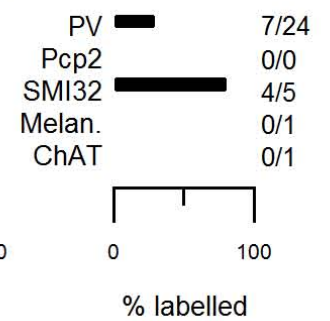

**Group 5** OFF alpha sust. (a)  
 n = 44 Cells, 0.55%, (0.88% of RGCs); CF: 1.21



SFig. 3-7 a

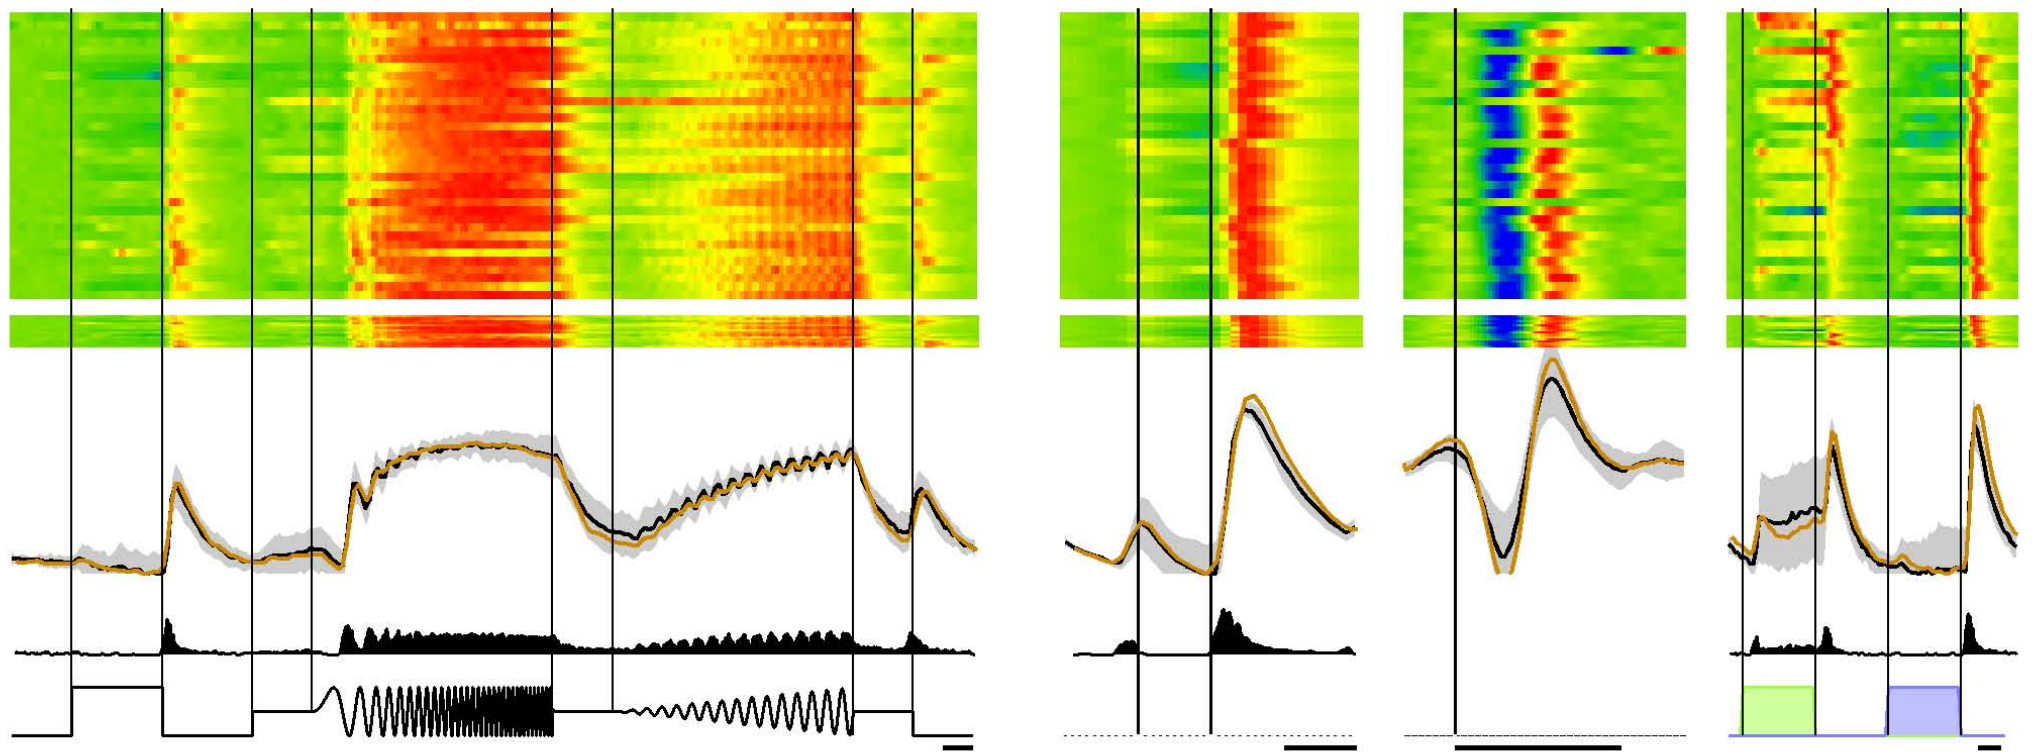

b

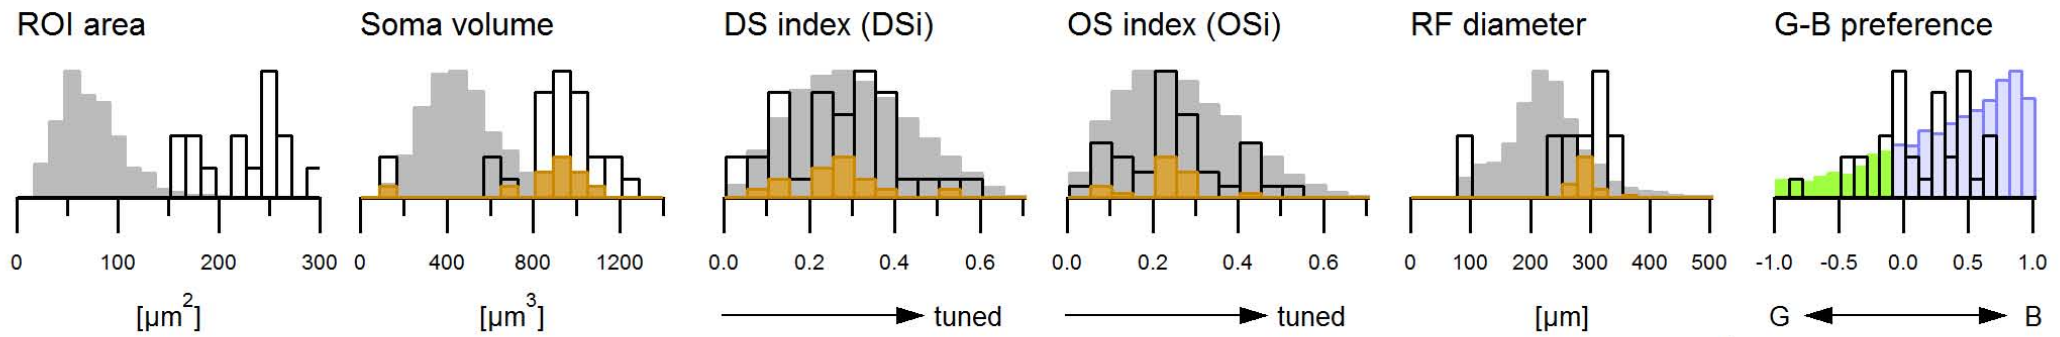

c

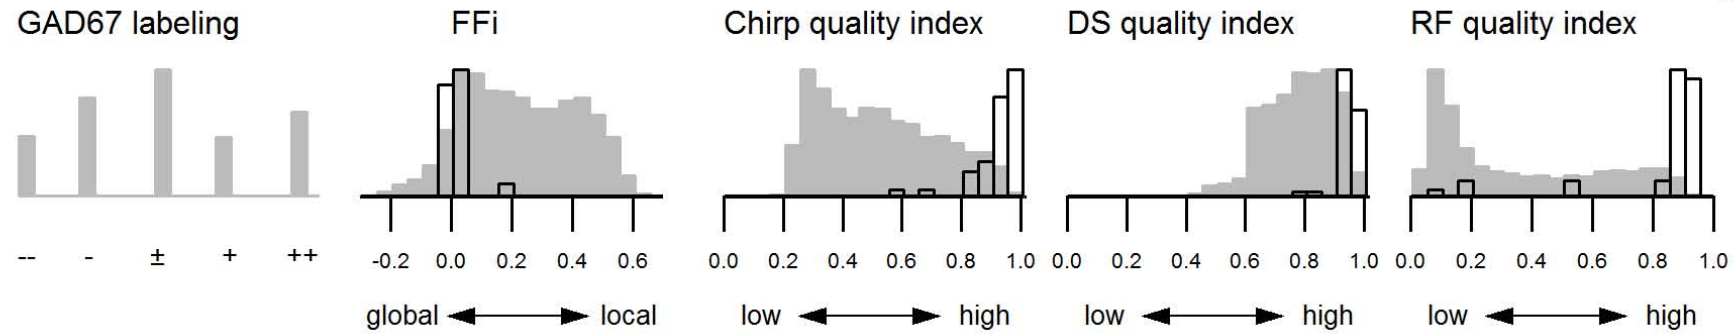

d

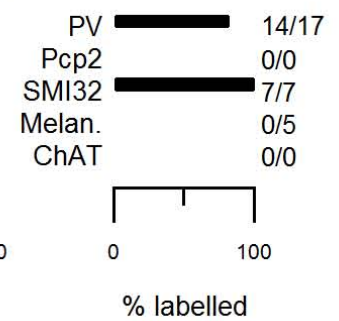

**Group 5** OFF alpha sust. (b)  
 n = 34 Cells, 0.43%, (0.68% of RGCs); CF: 1.11

SFig. 3-8 a

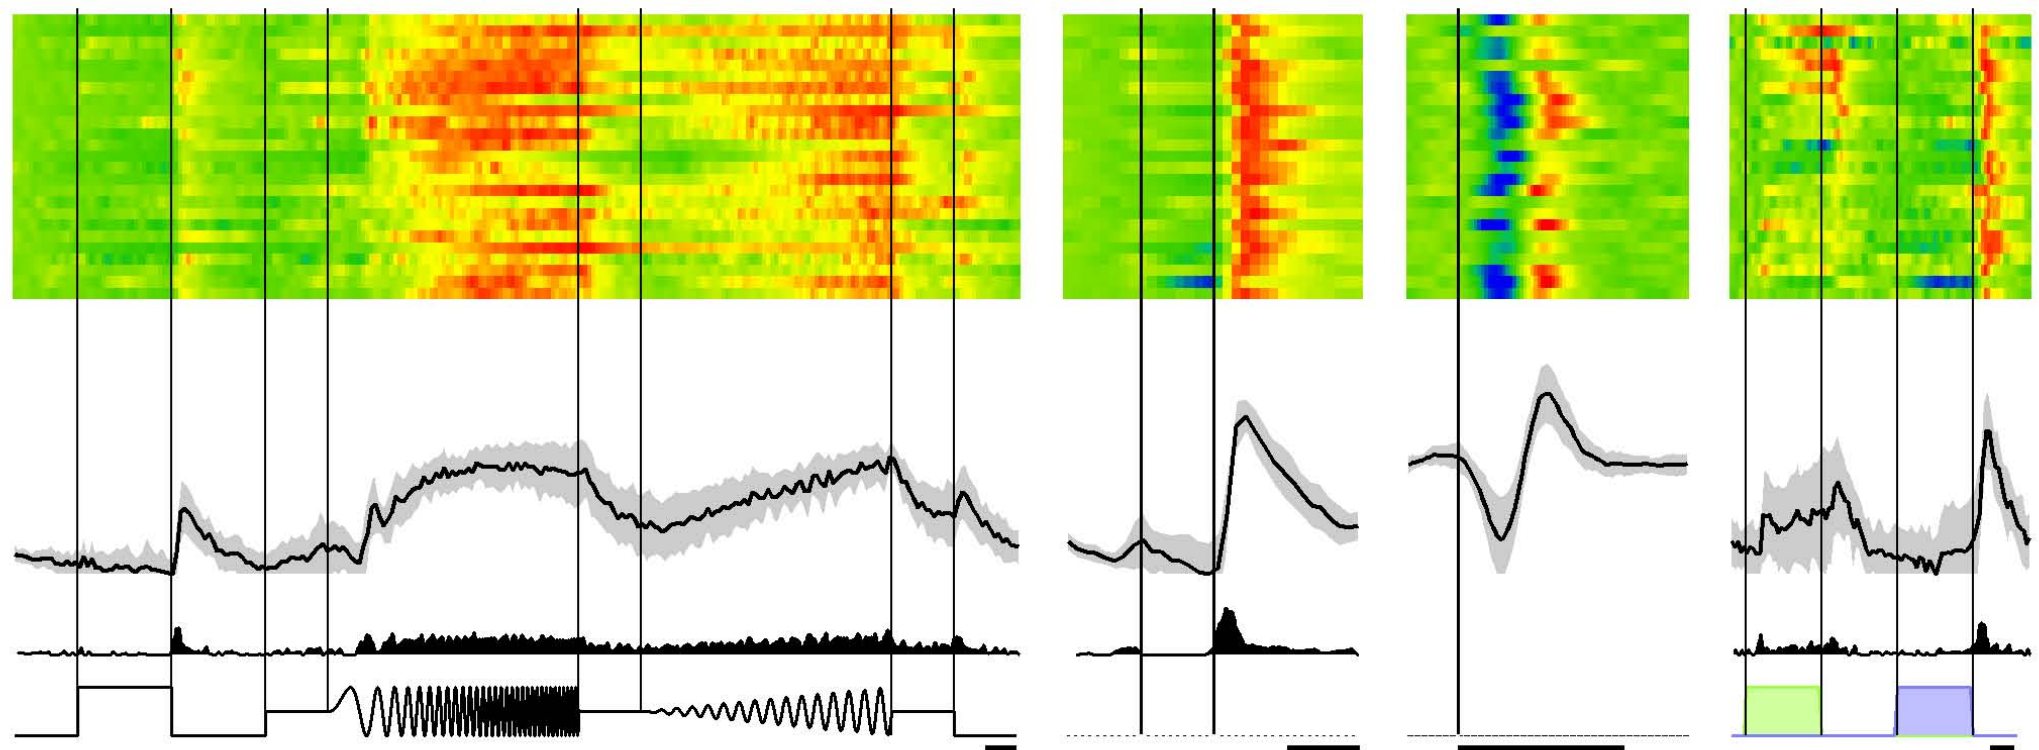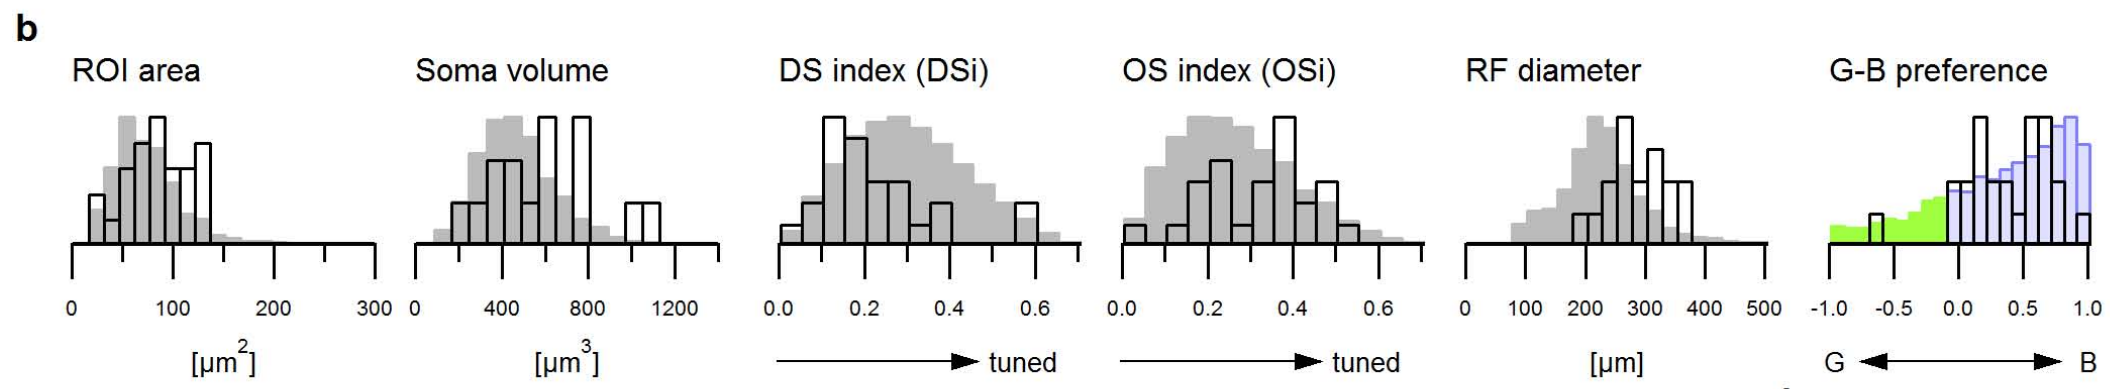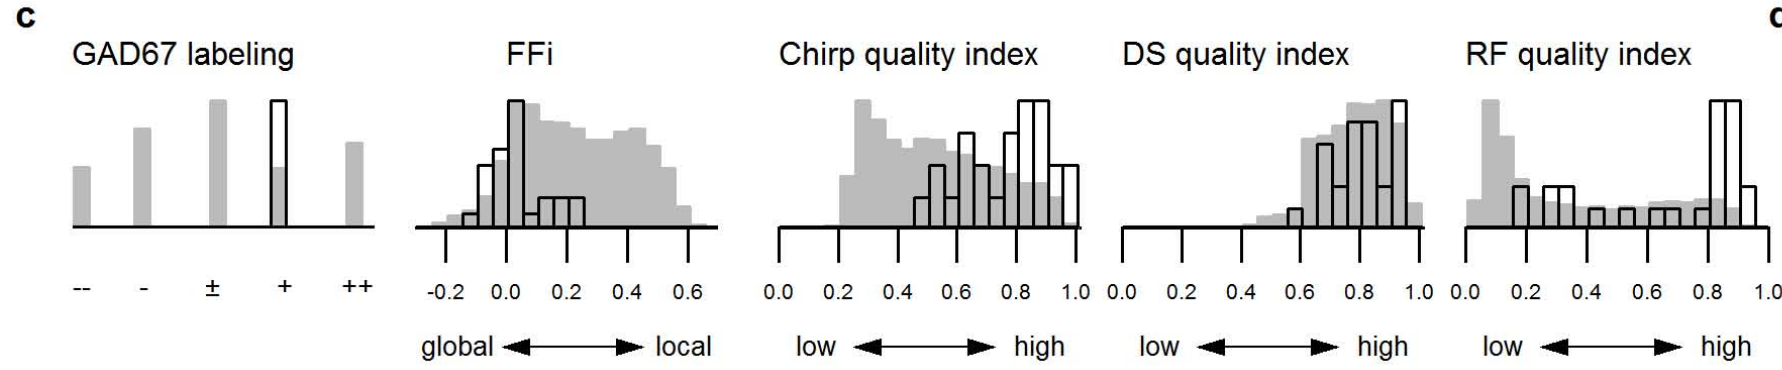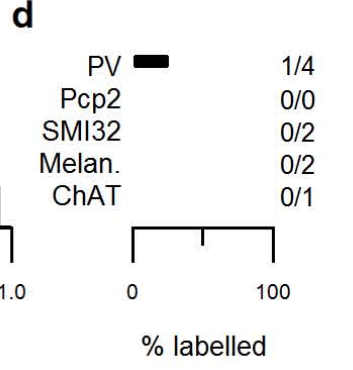

**Group 5** OFF alpha sust. (c)  
 n = 25 Cells, 0.31%, (0.5% of RGCs); CF: 0.64



SFig. 3-9 a

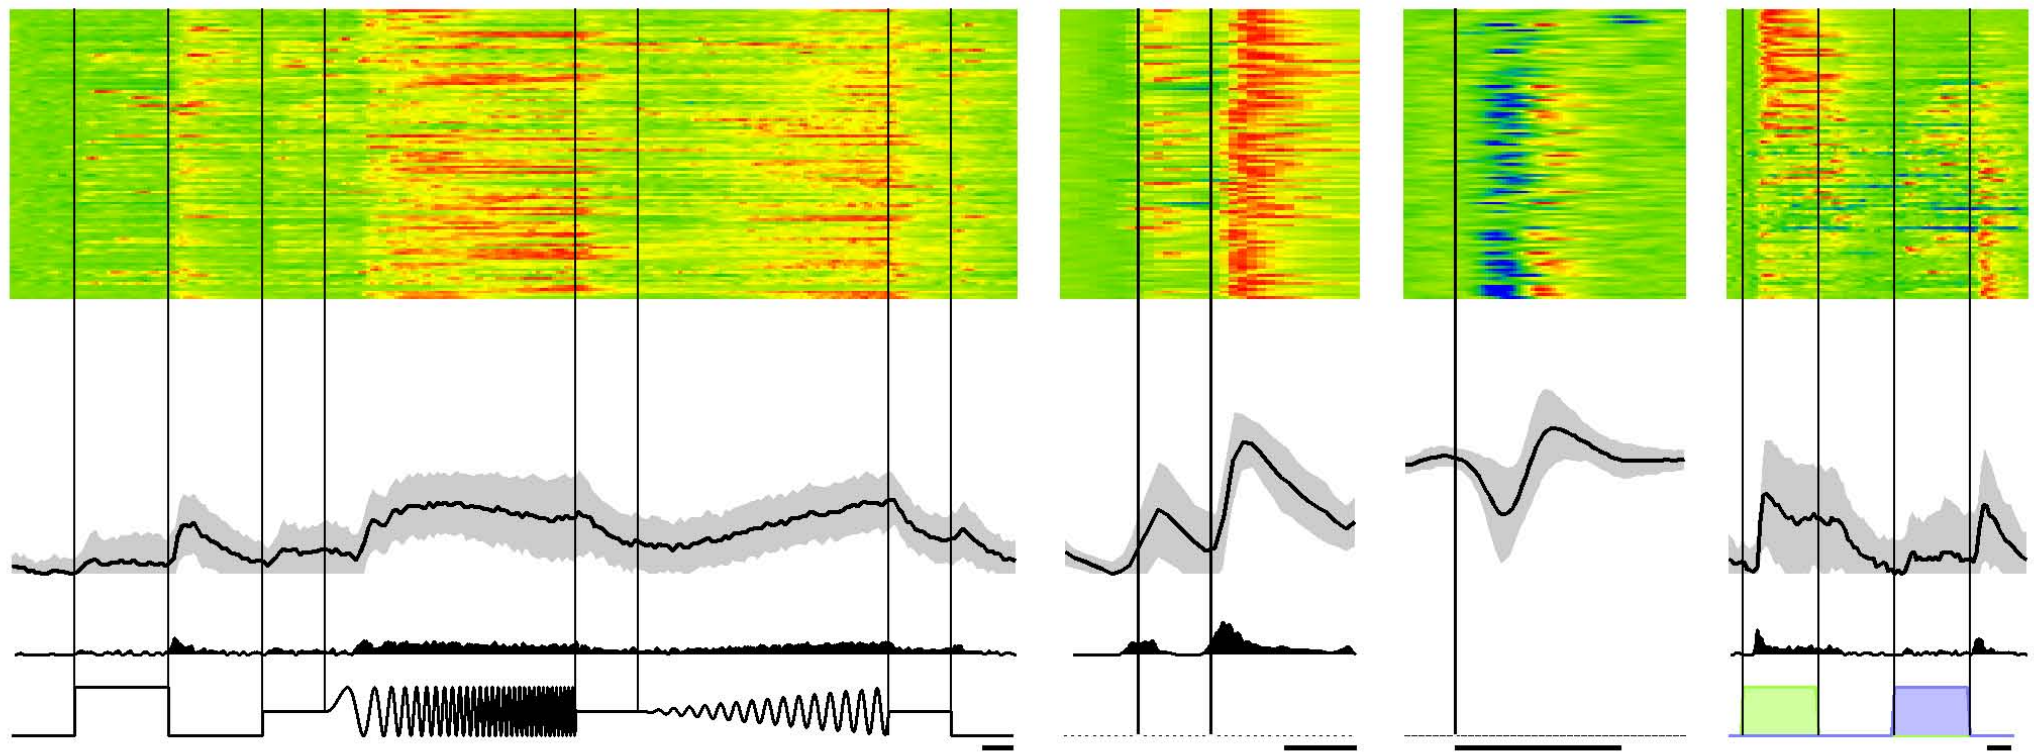

b

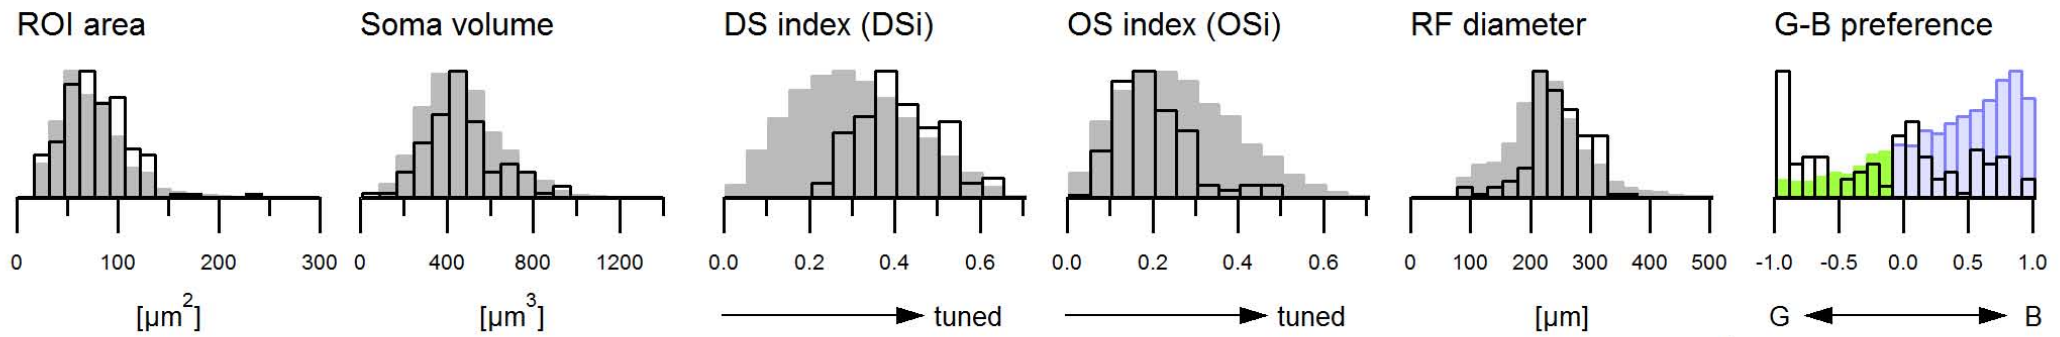

c

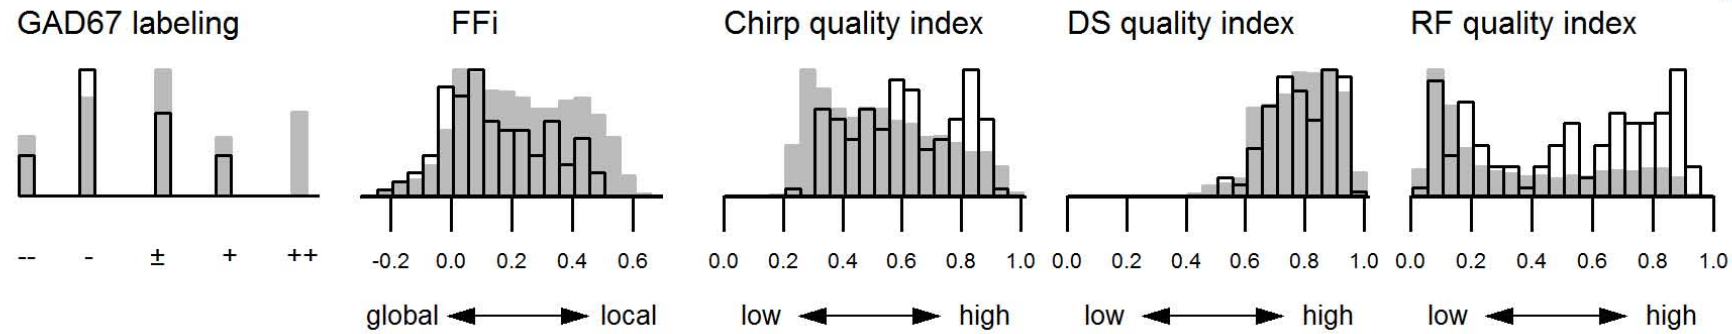

d

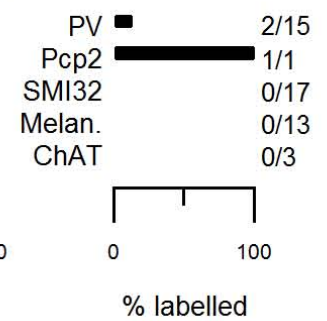

**Group 6** (ON-)OFF "JAM-B" mix  
 n = 104 Cells, 1.3%, (2.07% of RGCs); CF: 2.03

SFig. 3-10 a

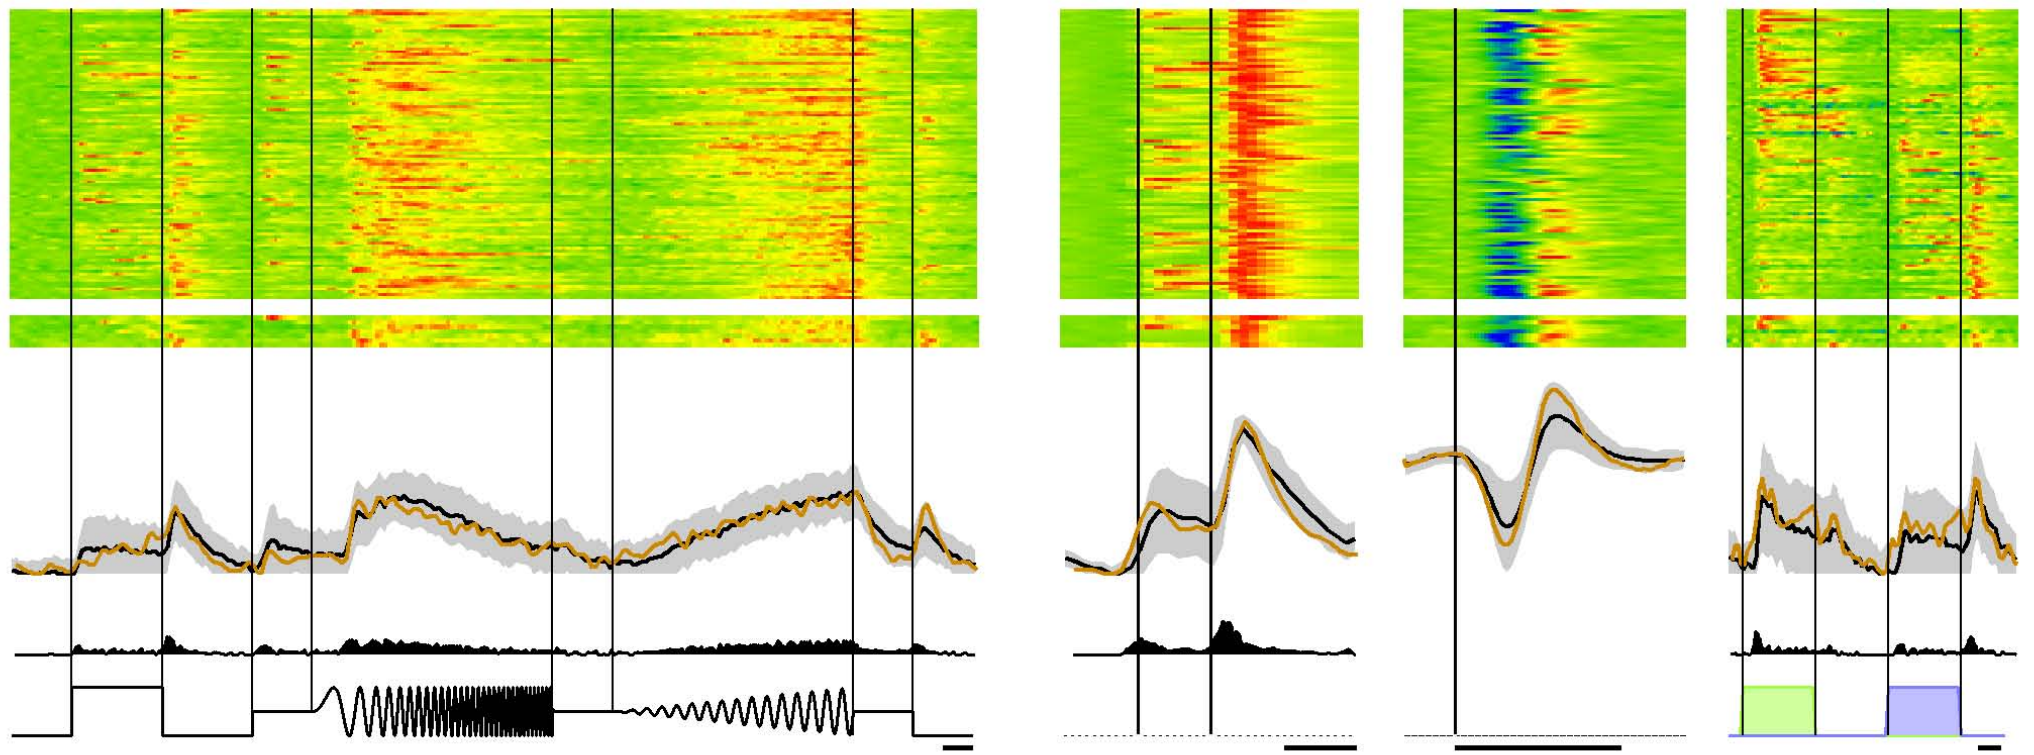

**b**

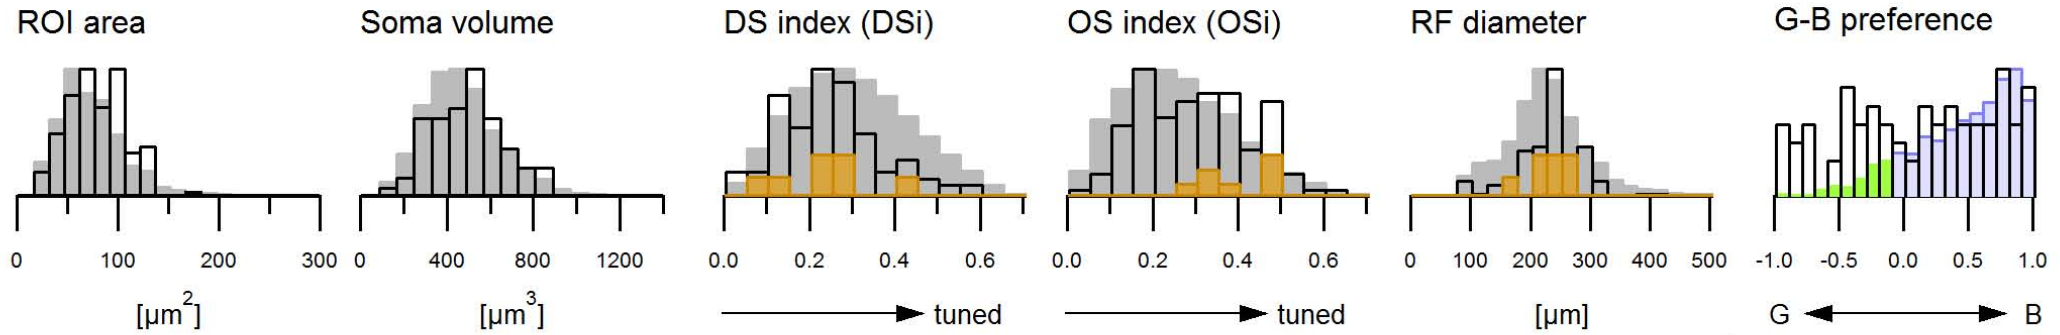

**c**

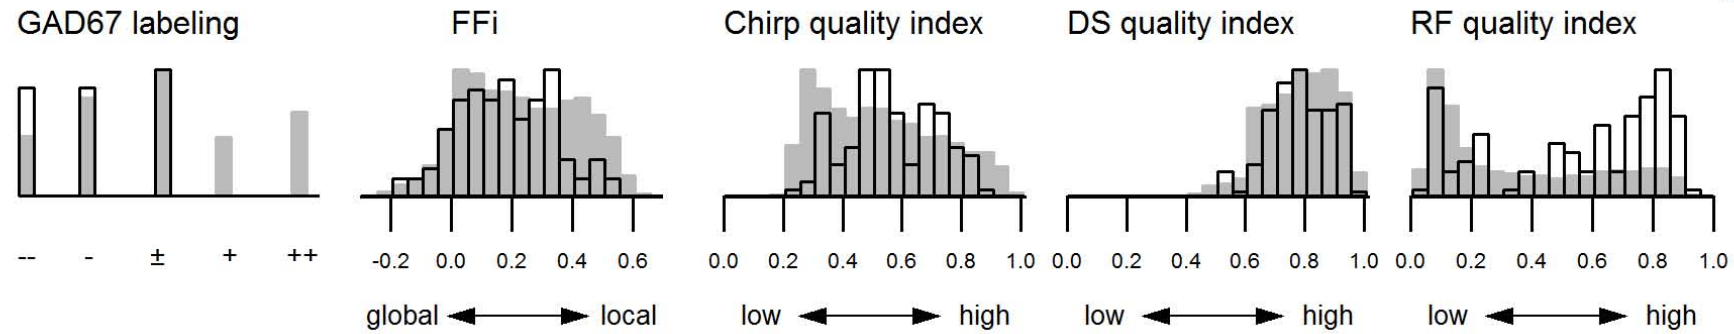

**d**

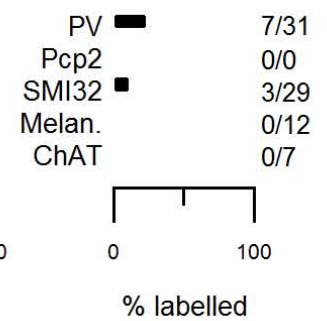

**Group 7 OFF sust.**

$n = 100$  Cells, 1.25%, (1.99% of RGCs); CF: 1.81



SFig. 3-11 a

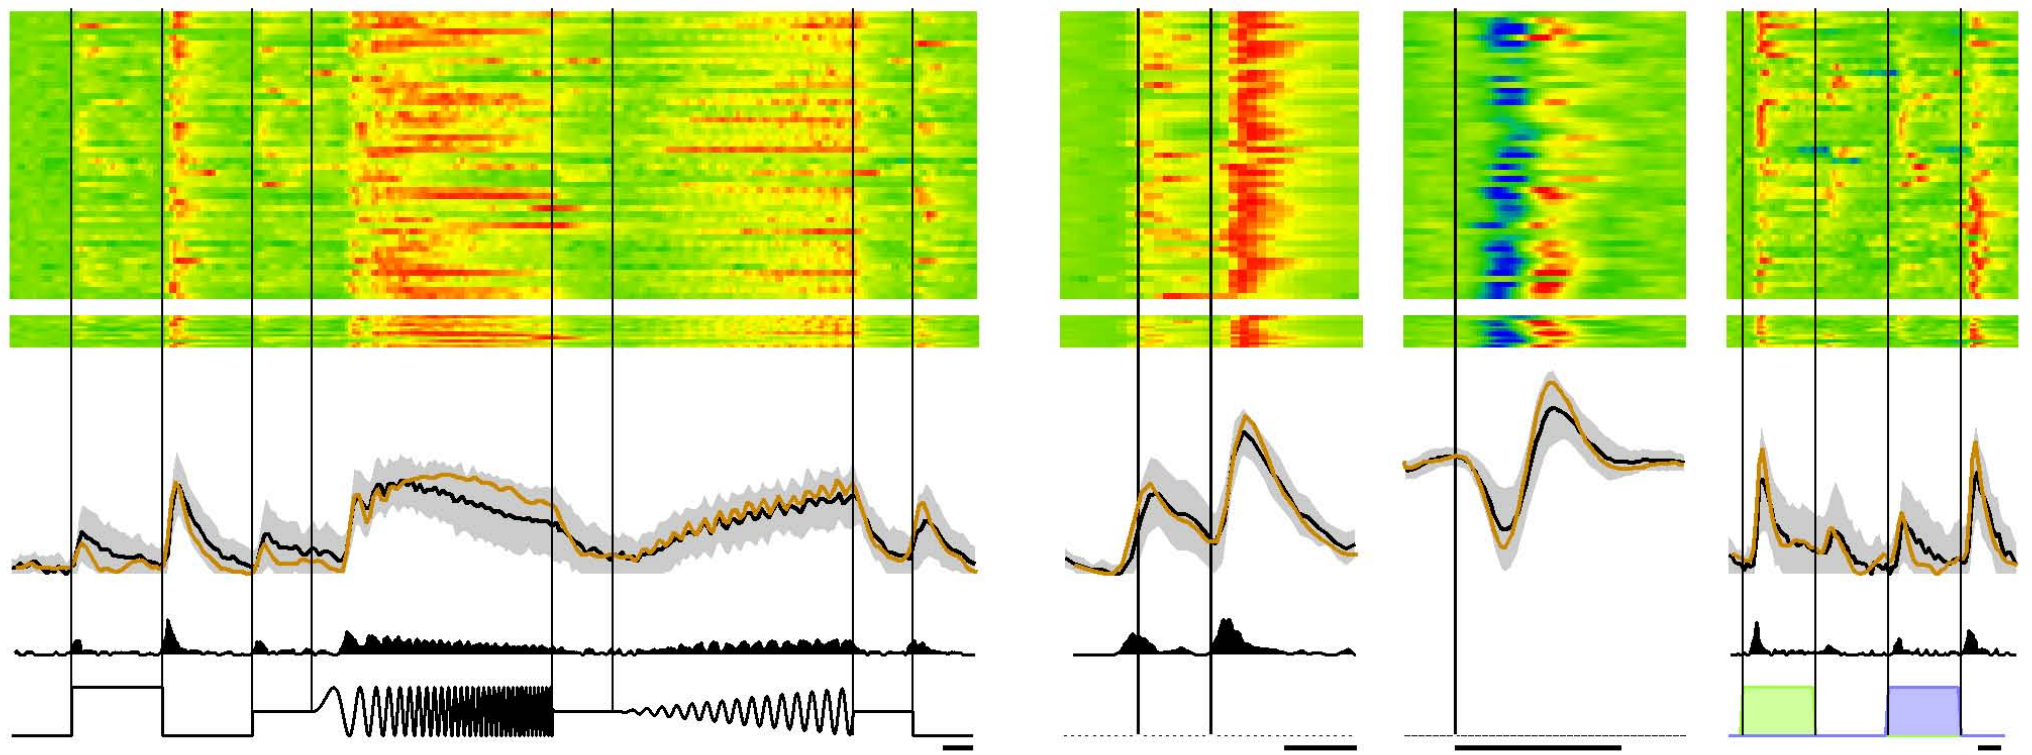

**b**

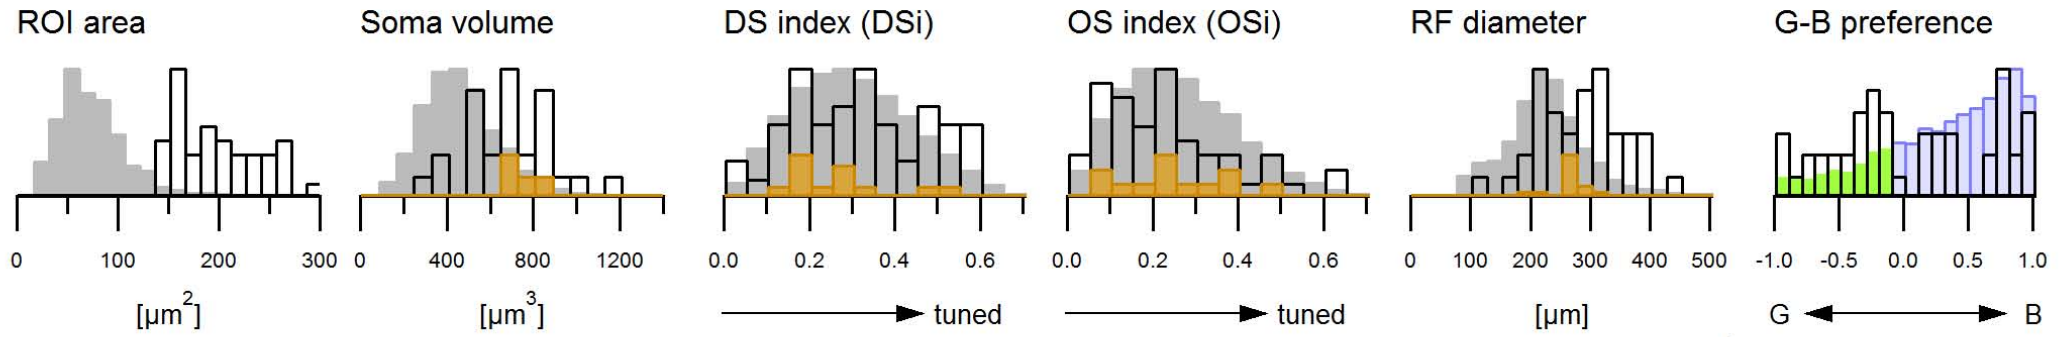

**c**

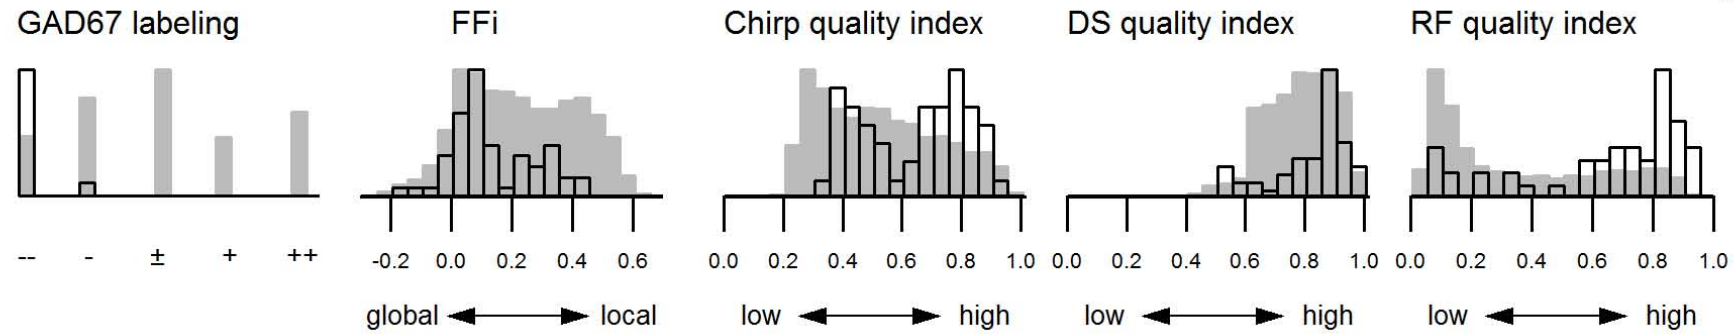

**d**

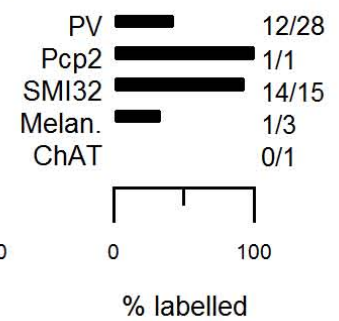

**Group 8** OFF alpha trans. (a)  
 n = 49 Cells, 0.61%, (0.98% of RGCs); CF: 1.32

SFig. 3-12 a

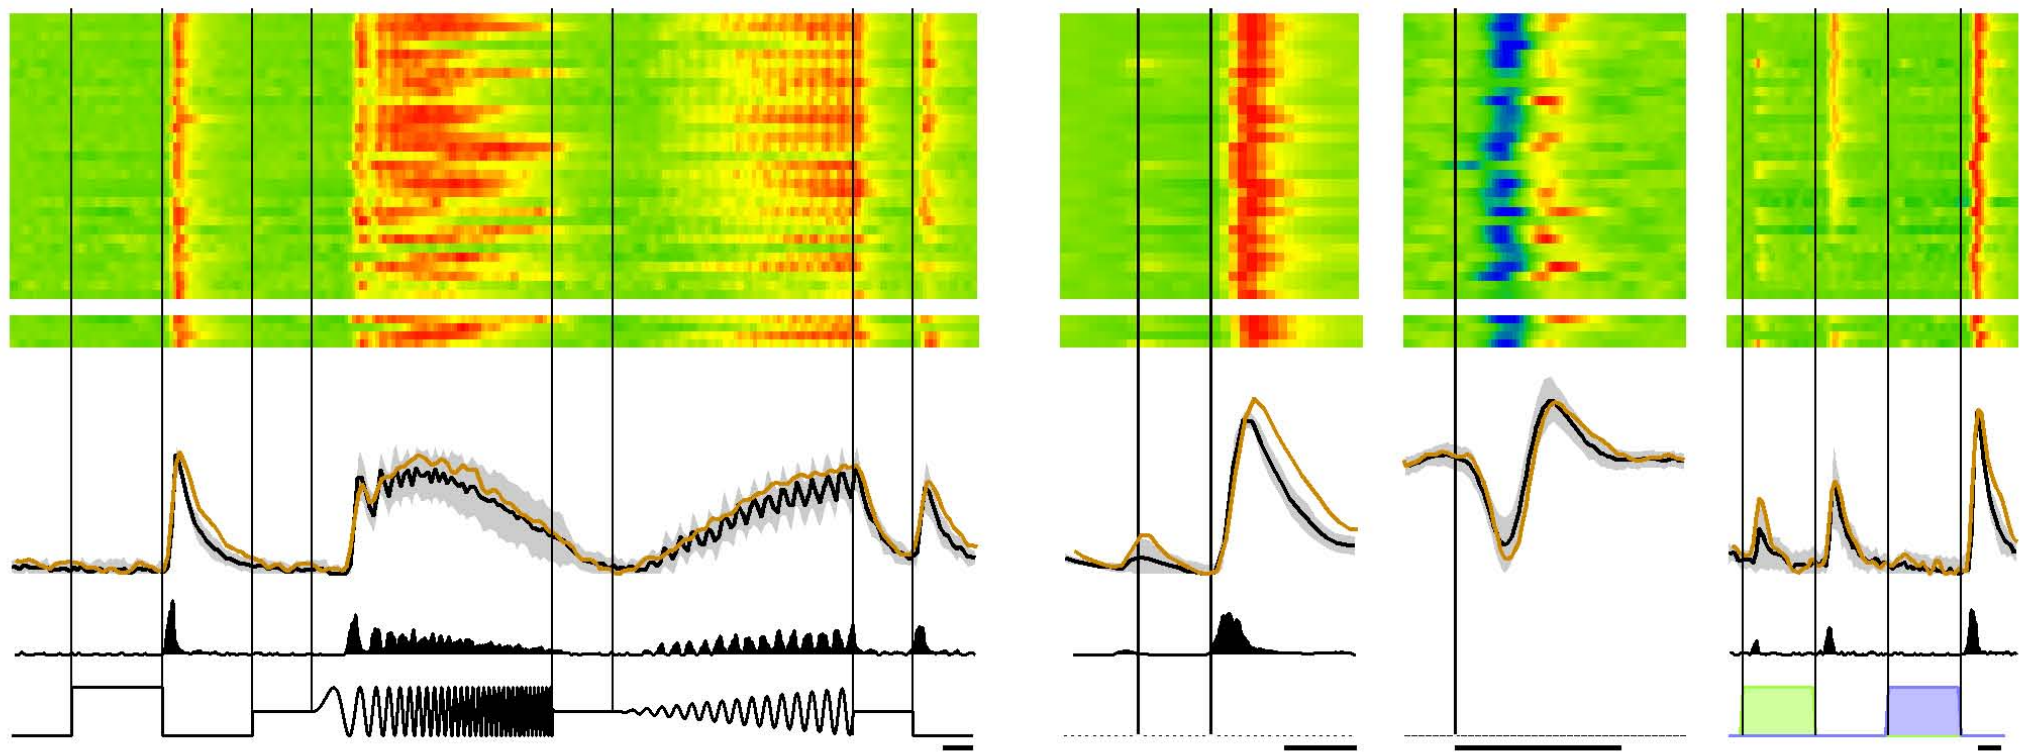

**b**

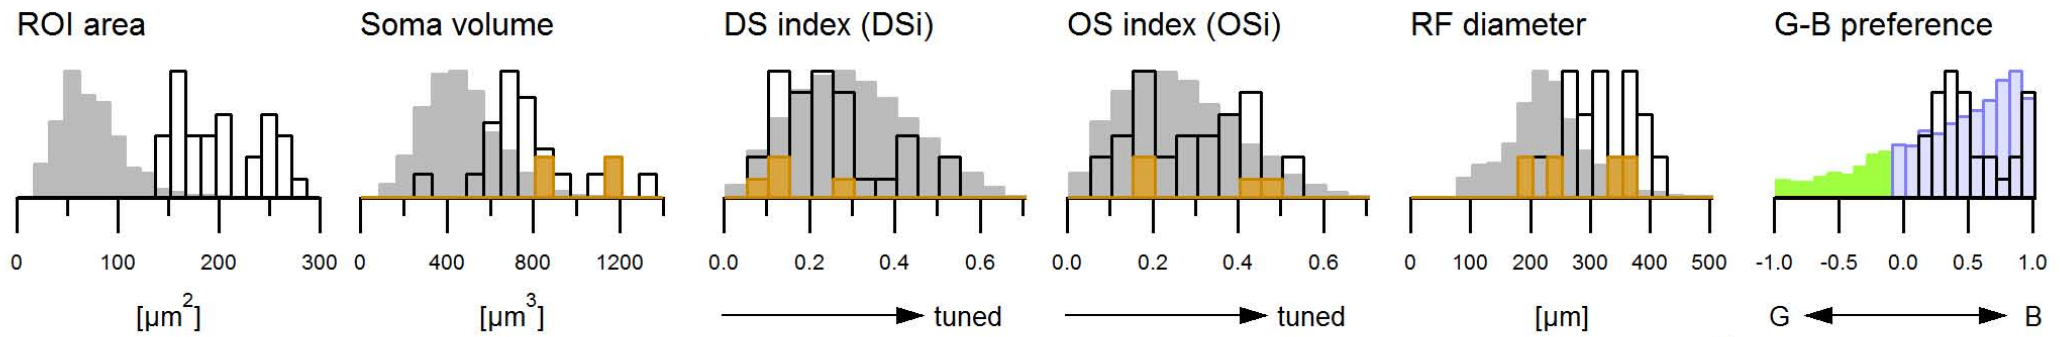

**c**

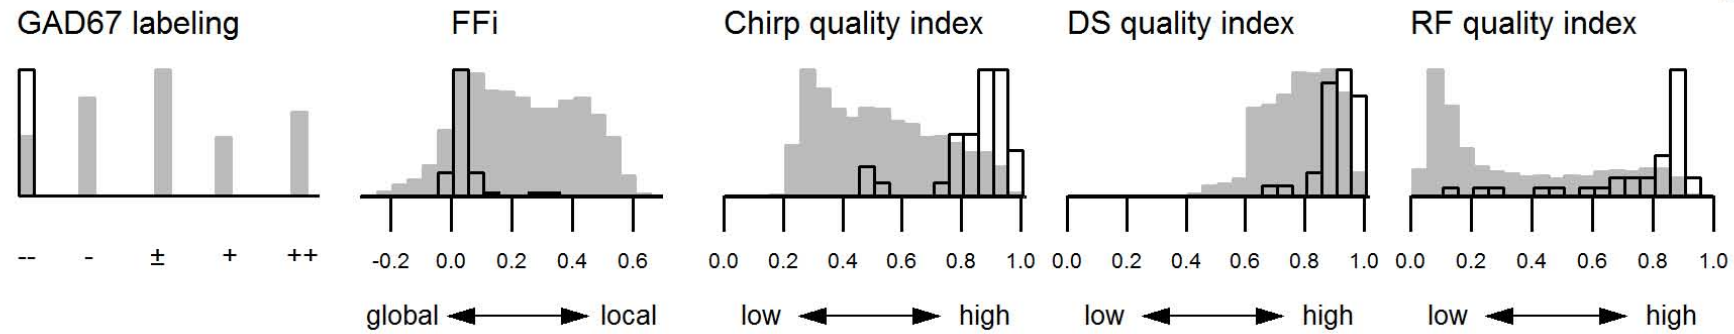

**d**

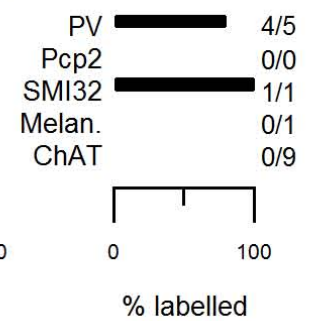

**Group 8** OFF alpha trans. (b)  
 n = 31 Cells, 0.39%, (0.62% of RGCs); CF: 1.06



SFig. 3-13 a

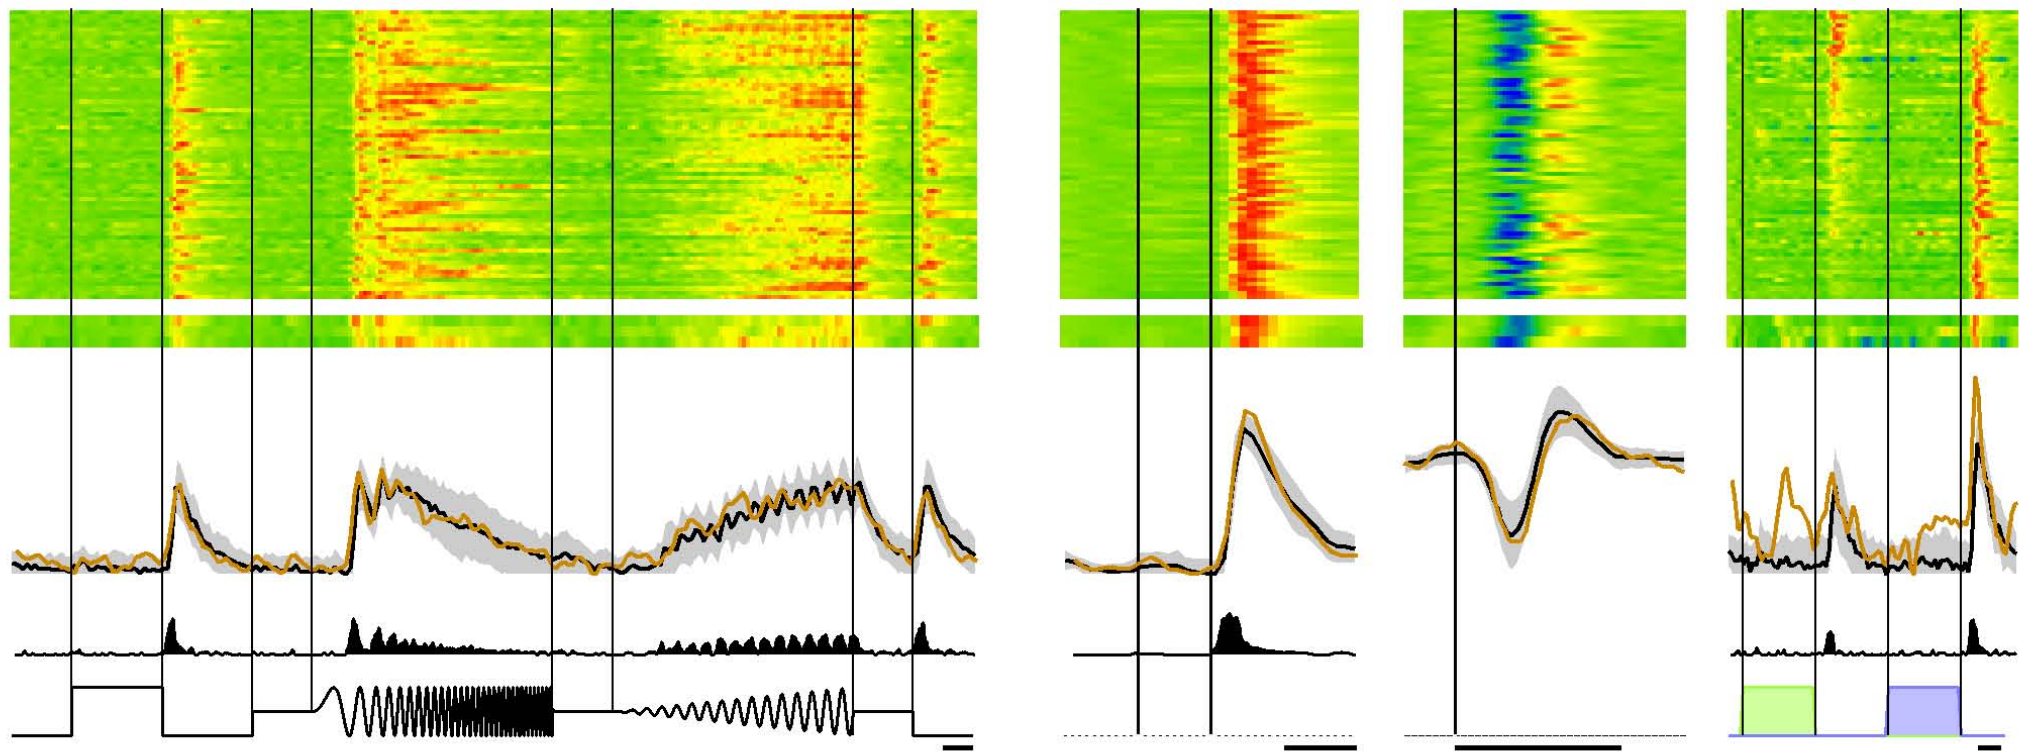

**b**

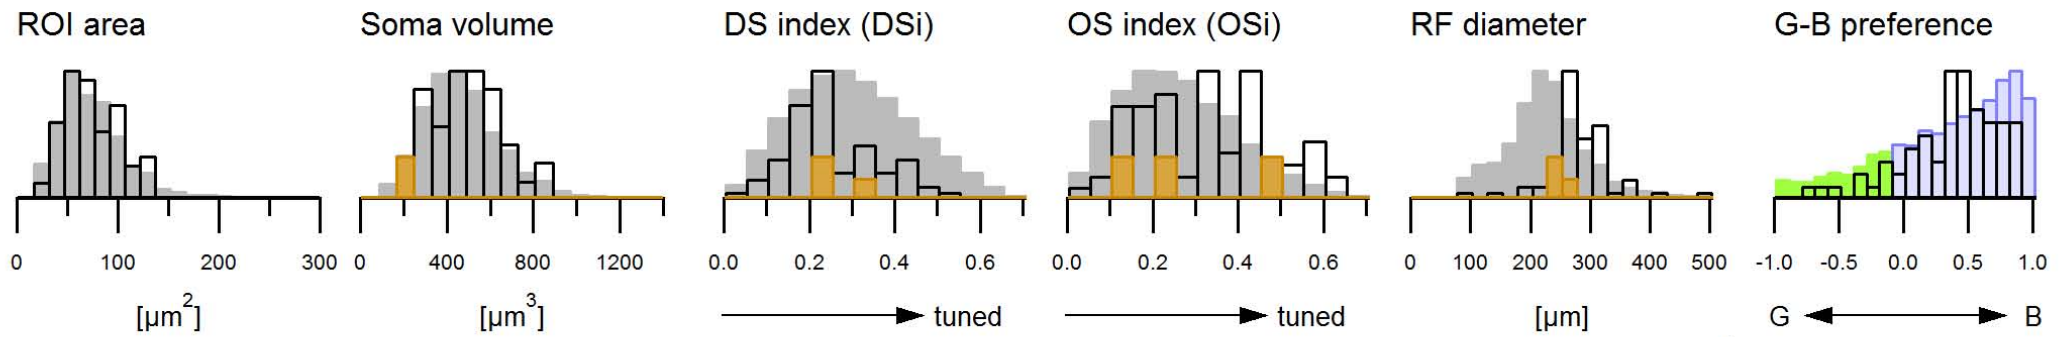

**c**

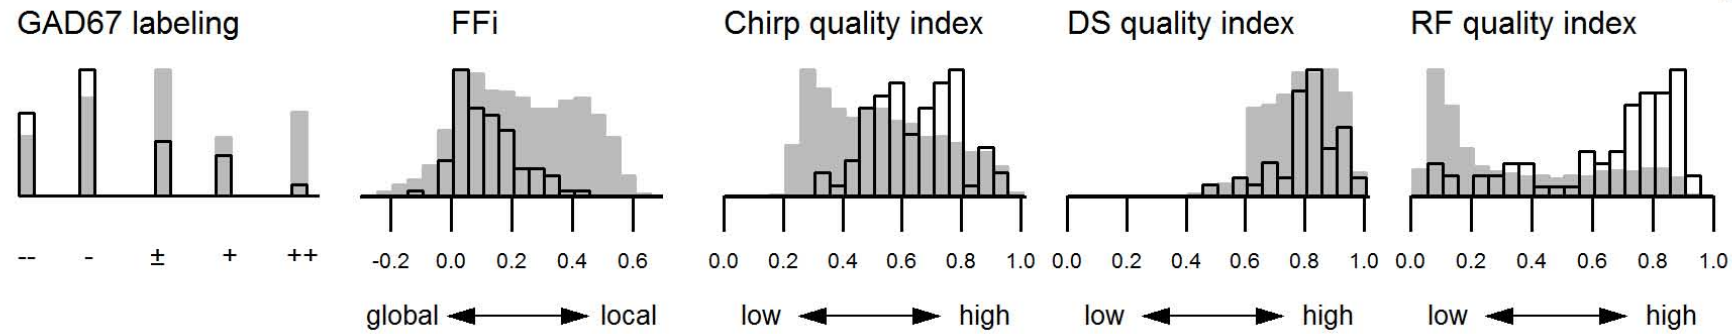

**d**

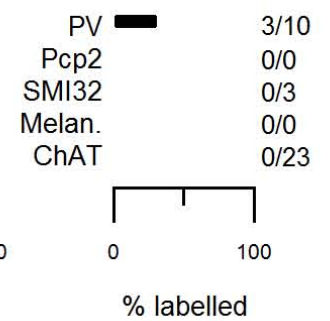

**Group 9** OFF "mini" alpha trans.  
 n = 68 Cells, 0.85%, (1.35% of RGCs); CF: 1.7

SFig. 3-14 a

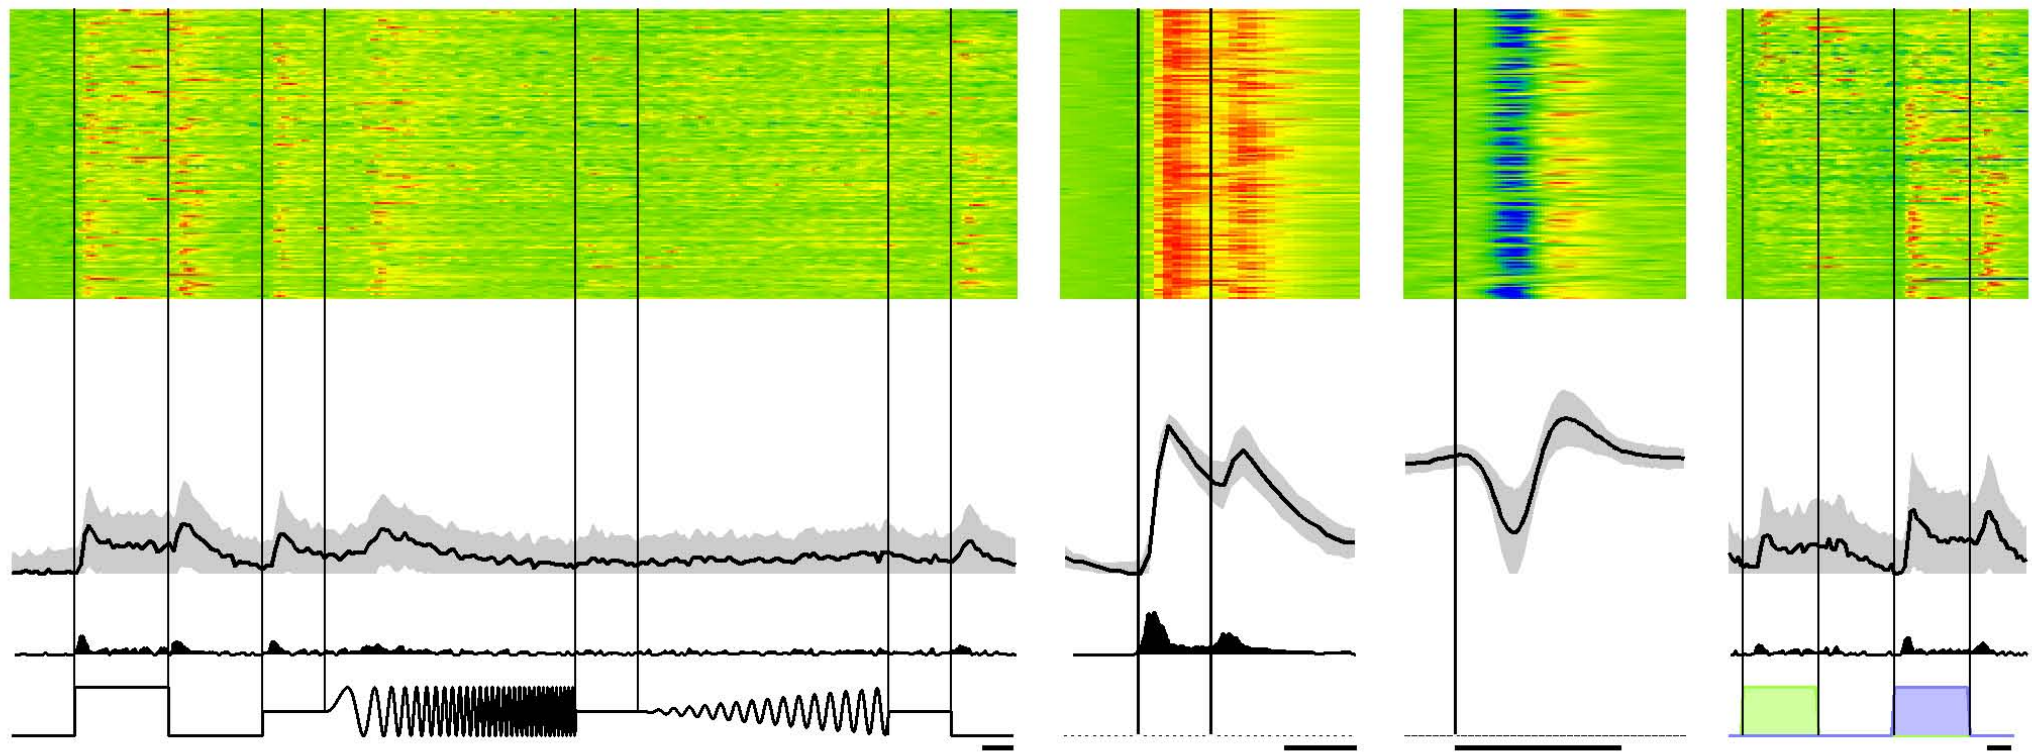

**b**

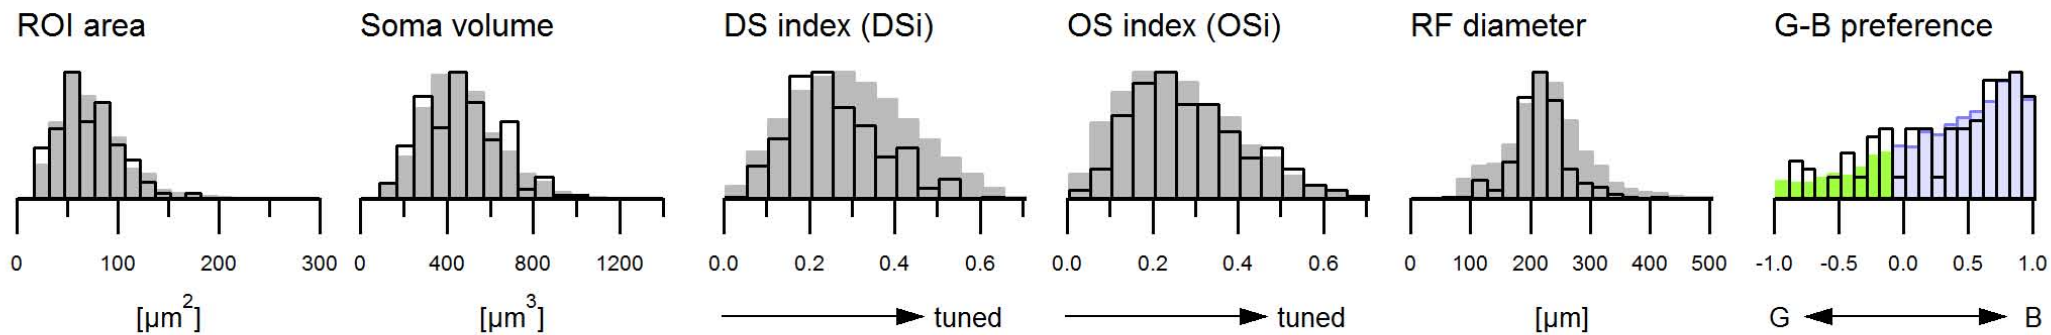

**c**

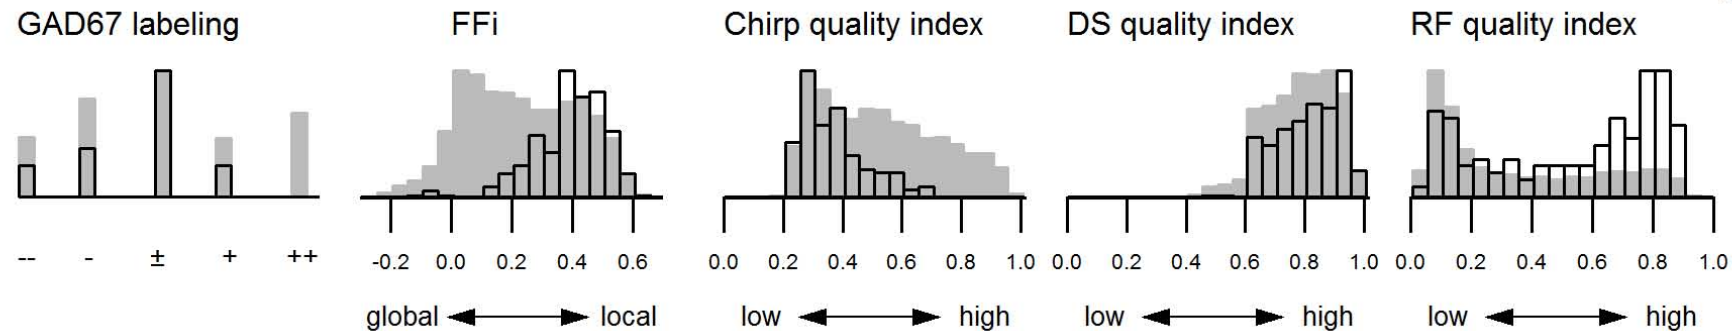

**d**

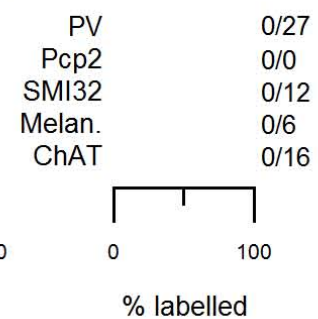

**Group 10 ON-OFF local-edge "W3"**  
 n = 149 Cells, 1.87%, (2.97% of RGCs); CF: 2.35



SFig. 3-15 a

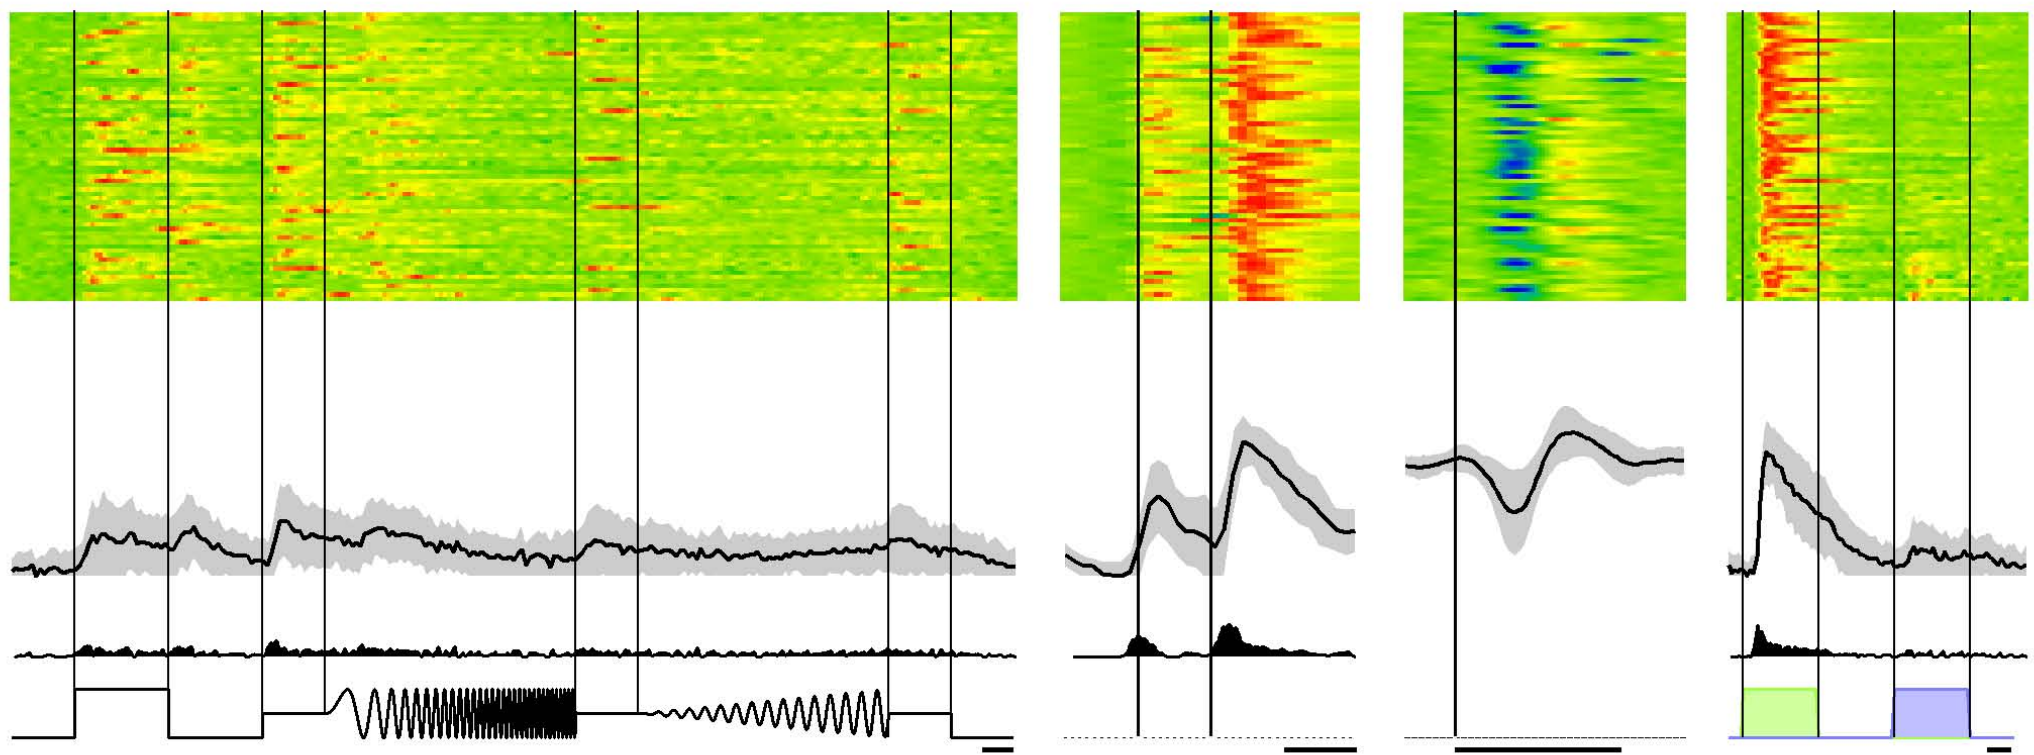

**b**

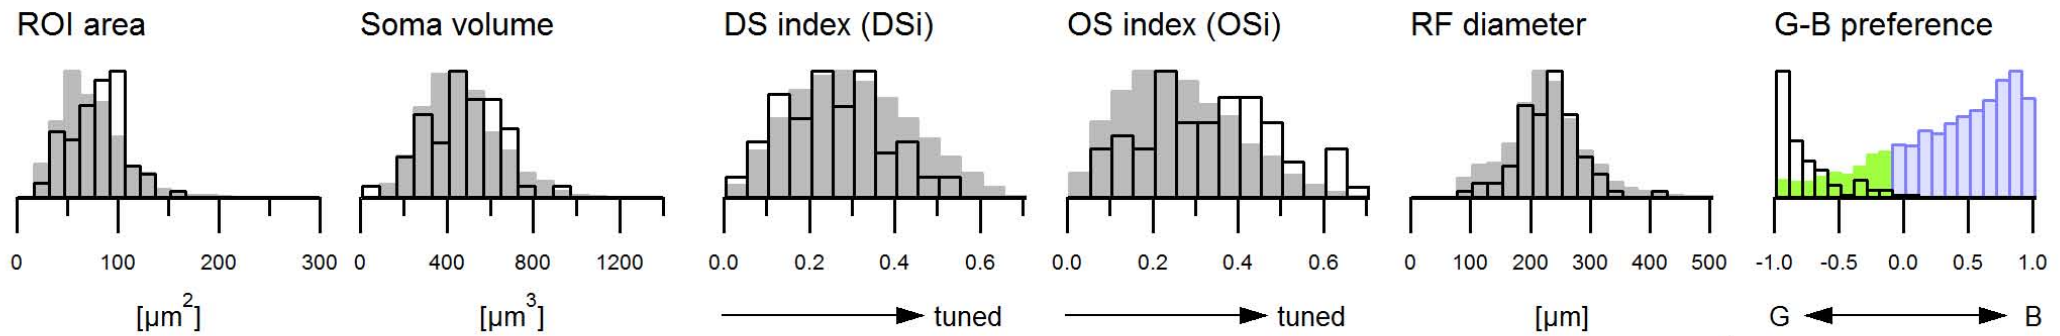

**c**

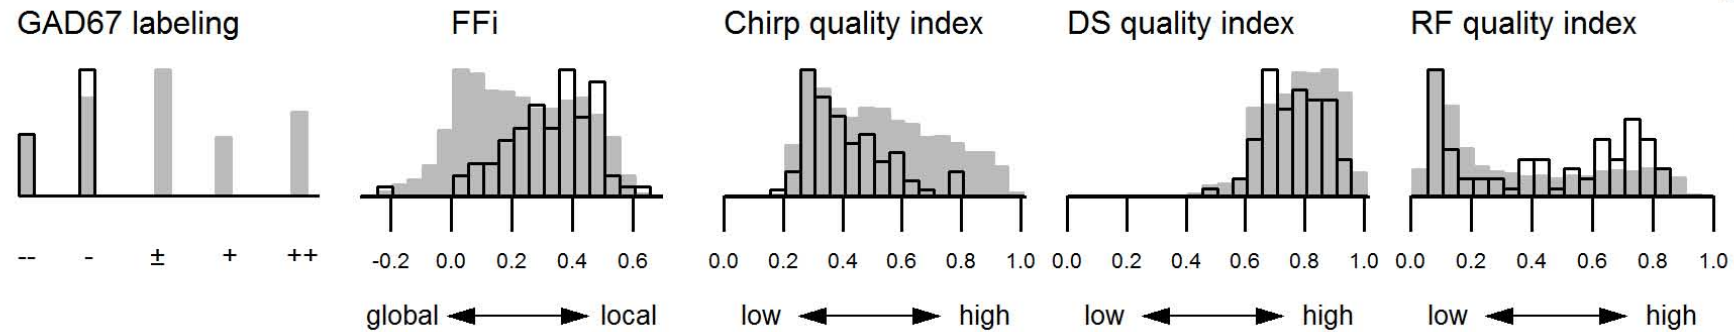

**d**

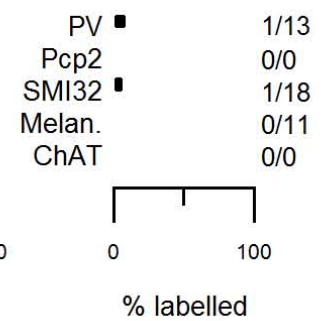

**Group 11 ON-OFF local (a)**

n = 66 Cells, 0.83%, (1.31% of RGCs); CF: 1.12

SFig. 3-16 a

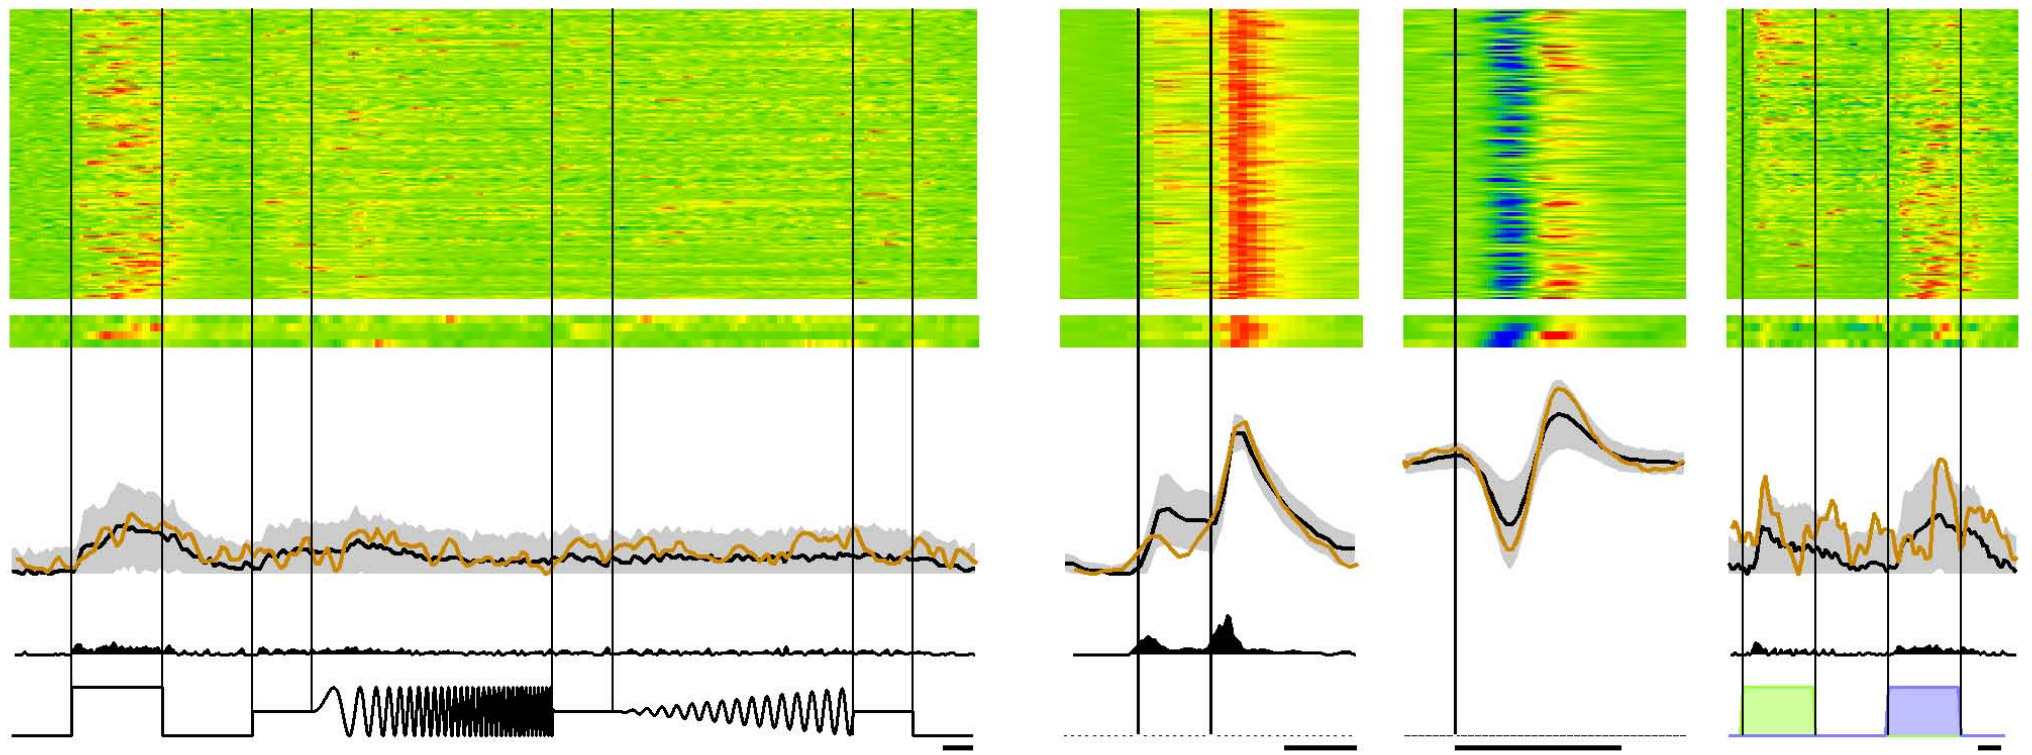

**b**

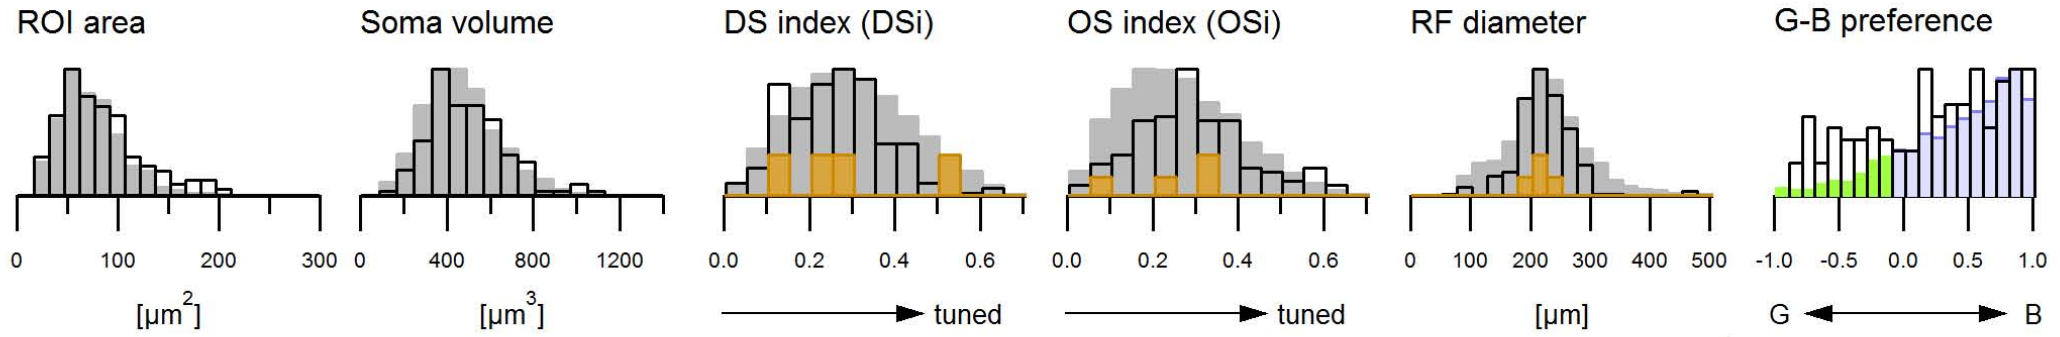

**c**

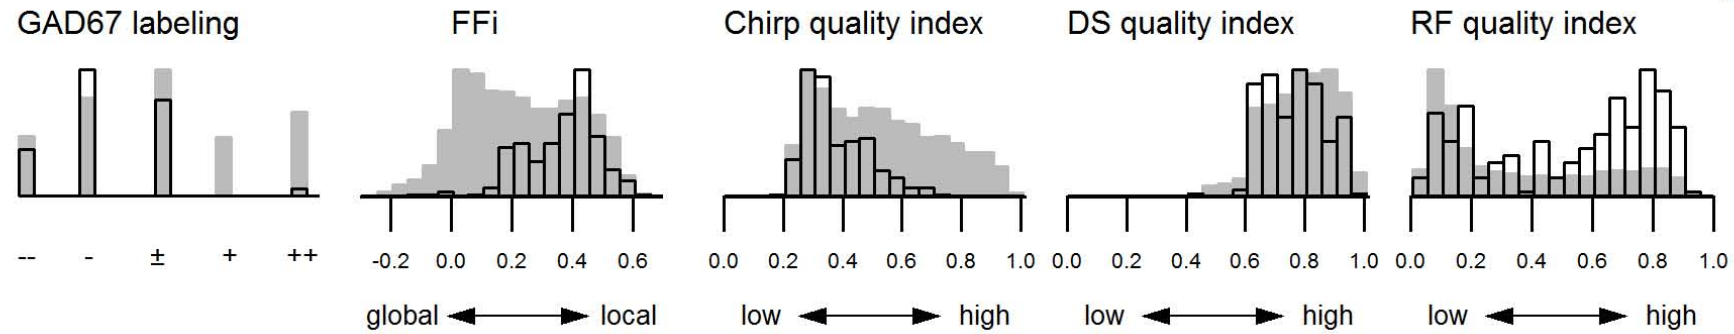

**d**

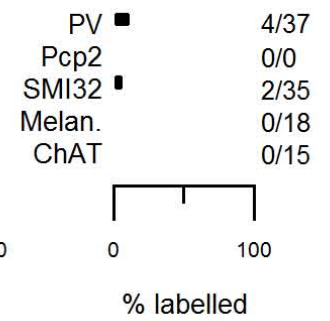

**Group 11 ON-OFF local (b)**

n = 151 Cells, 1.89%, (3.01% of RGCs); CF: 2.37



SFig. 3-17 a

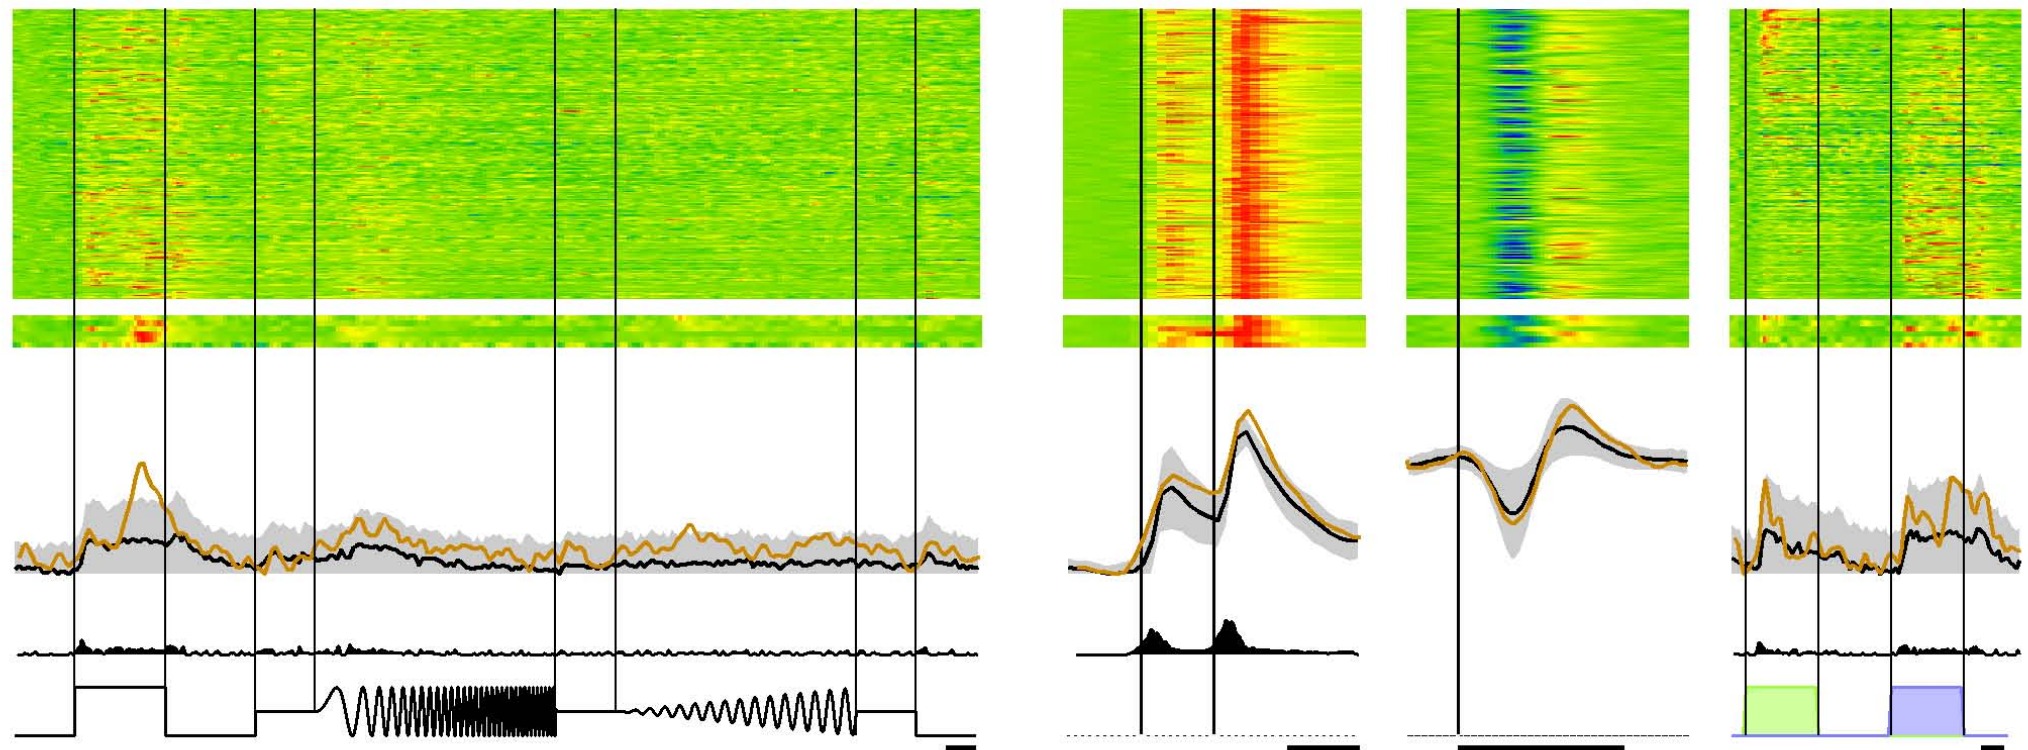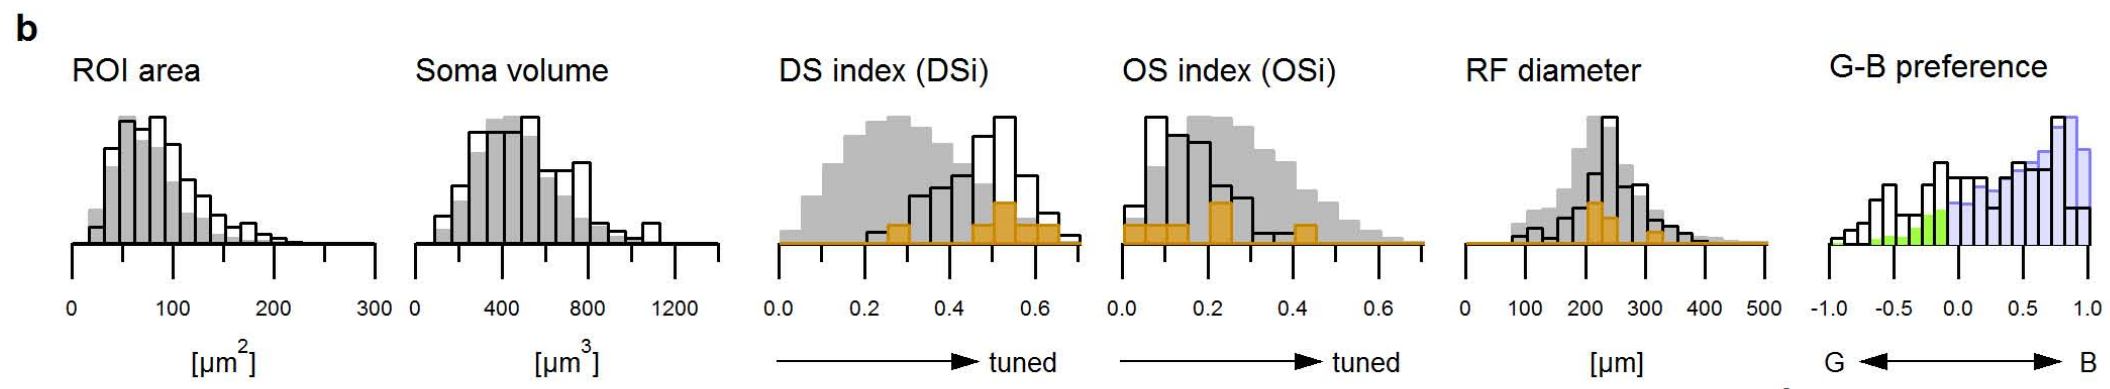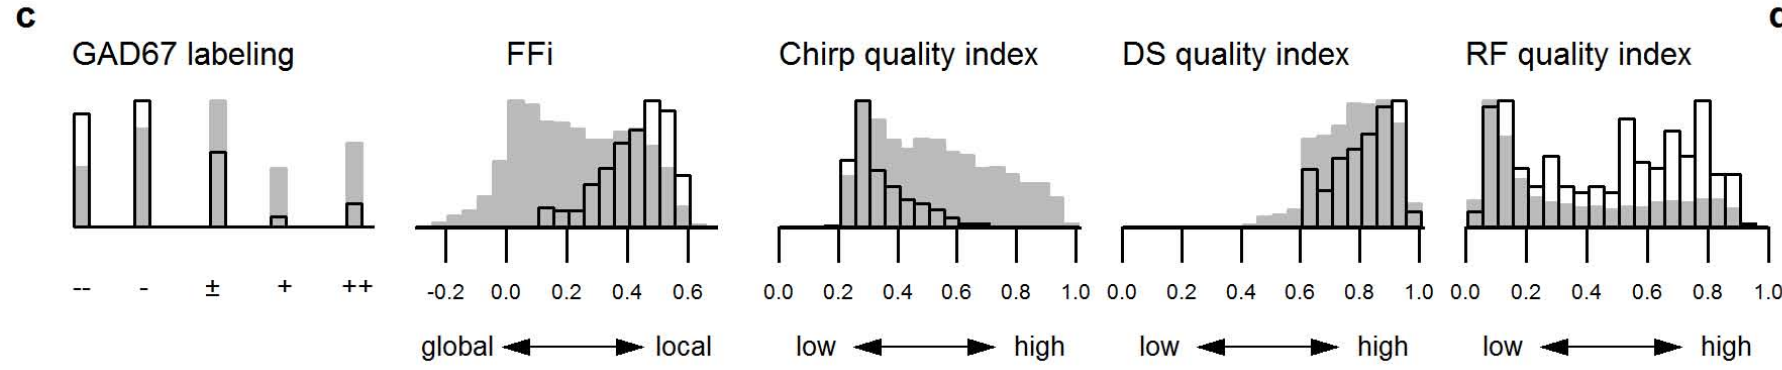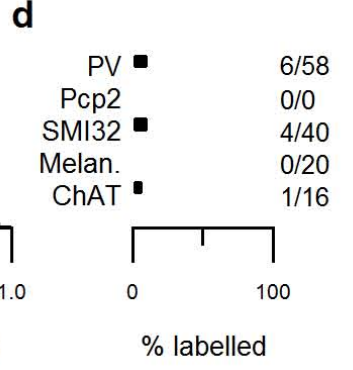

**Group 12 ON-OFF DS 1 (a)**  
 n = 206 Cells, 2.58%, (4.1% of RGCs); CF: 4.11

SFig. 3-18 a

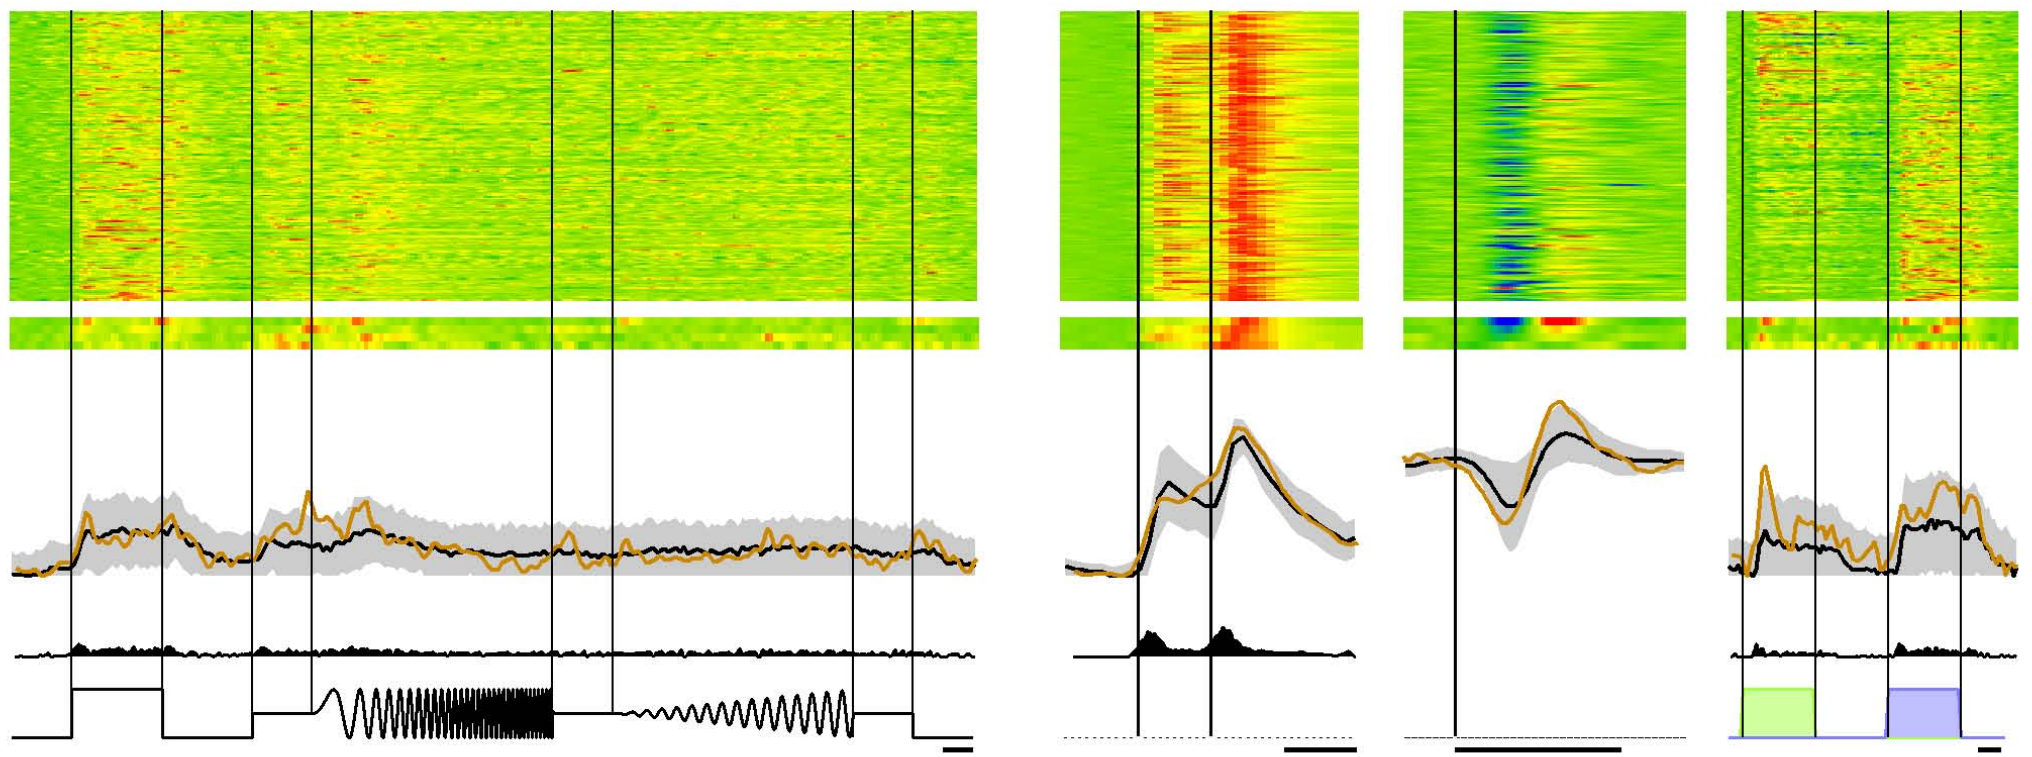

**b**

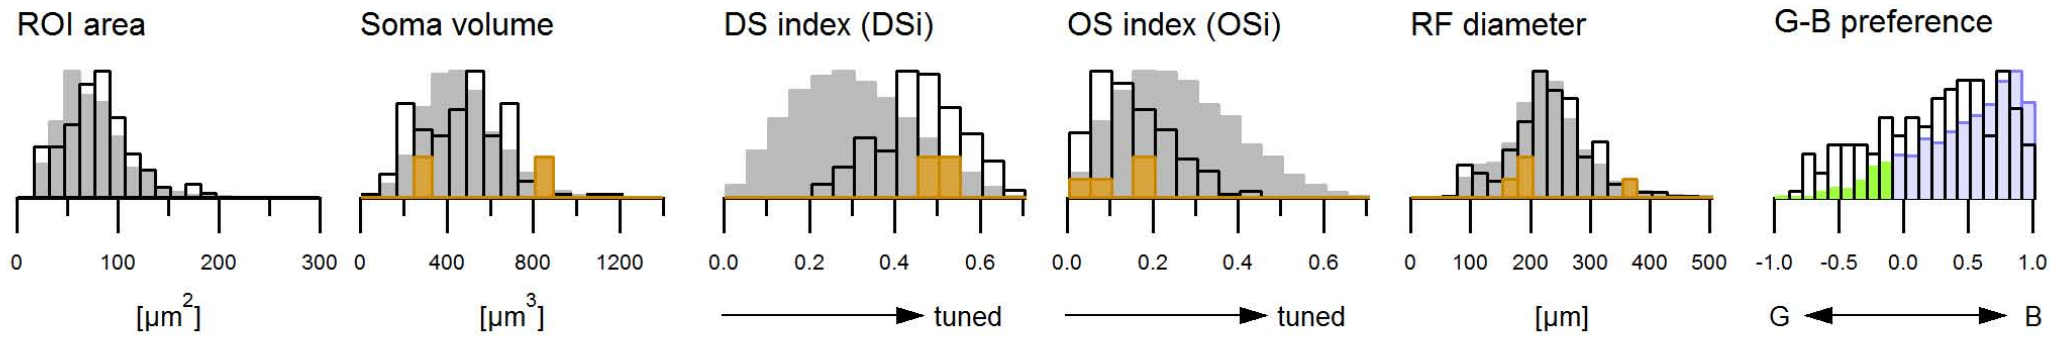

**c**

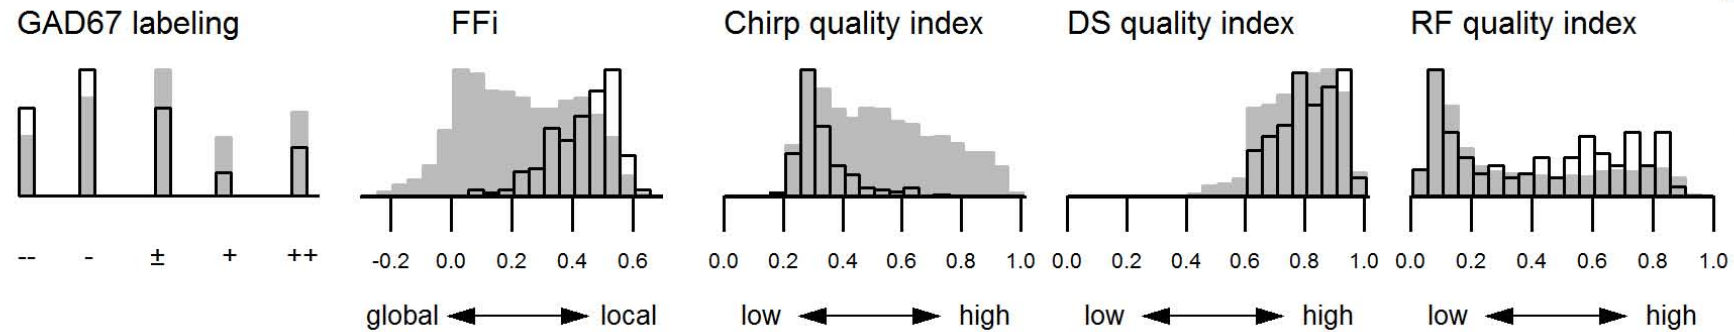

**d**

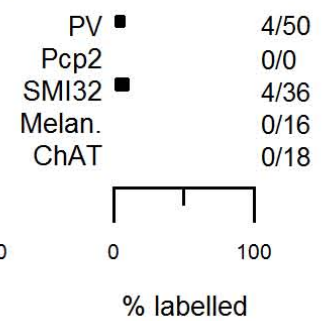

**Group 12 ON-OFF DS 1 (b)**

n = 191 Cells, 2.39%, (3.8% of RGCs); CF: 3.63



SFig. 3-19 a

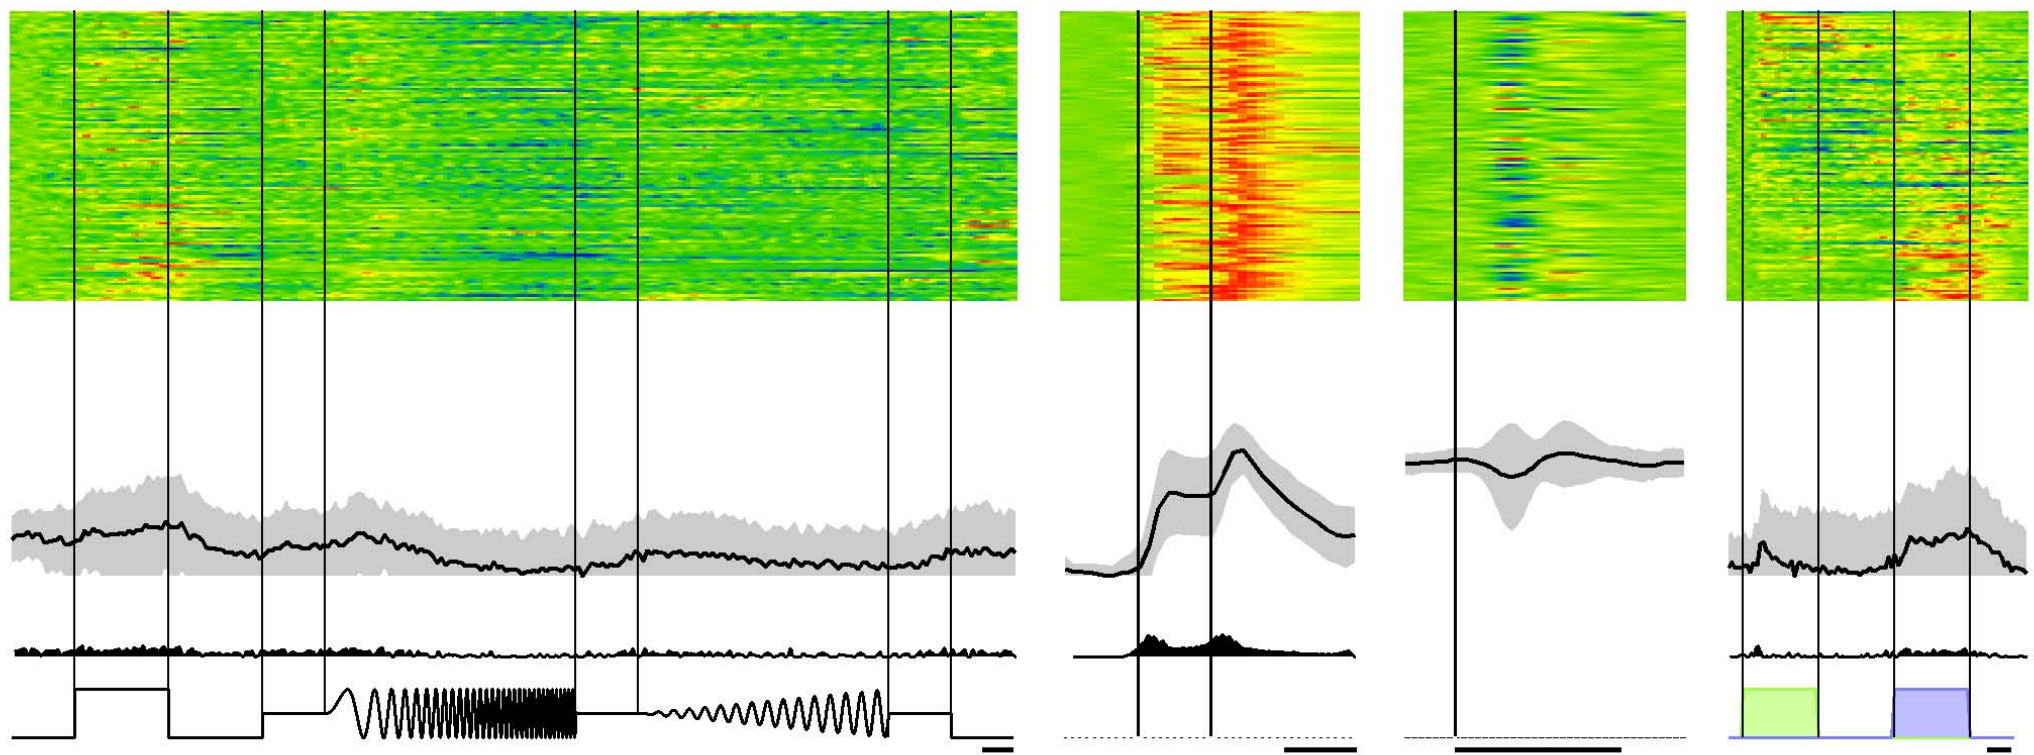

**b**

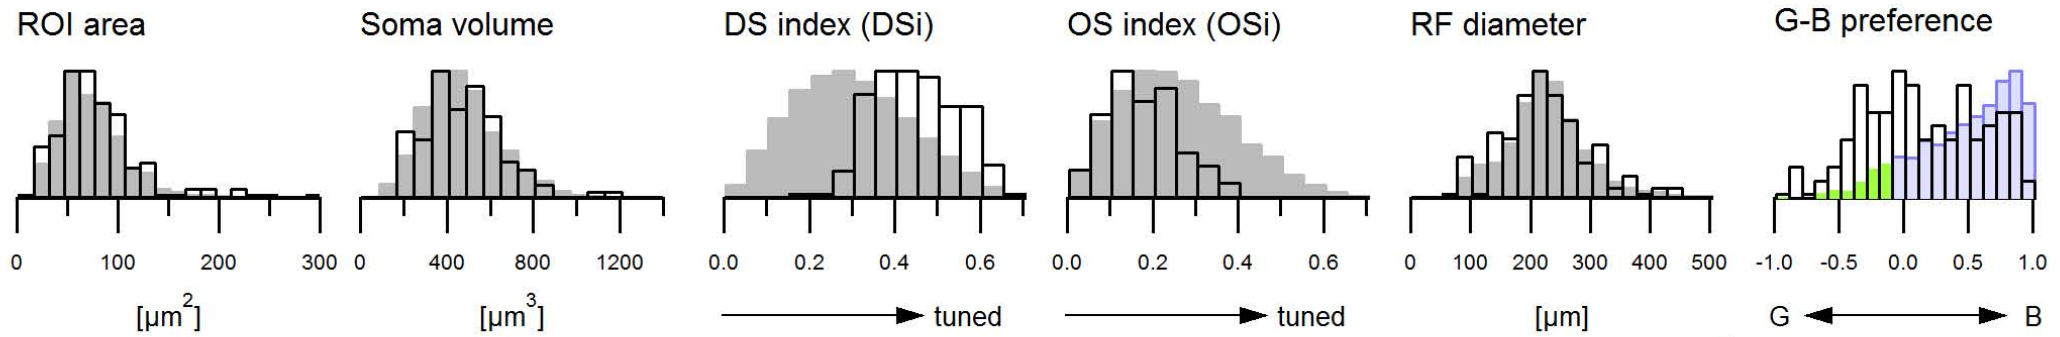

**c**

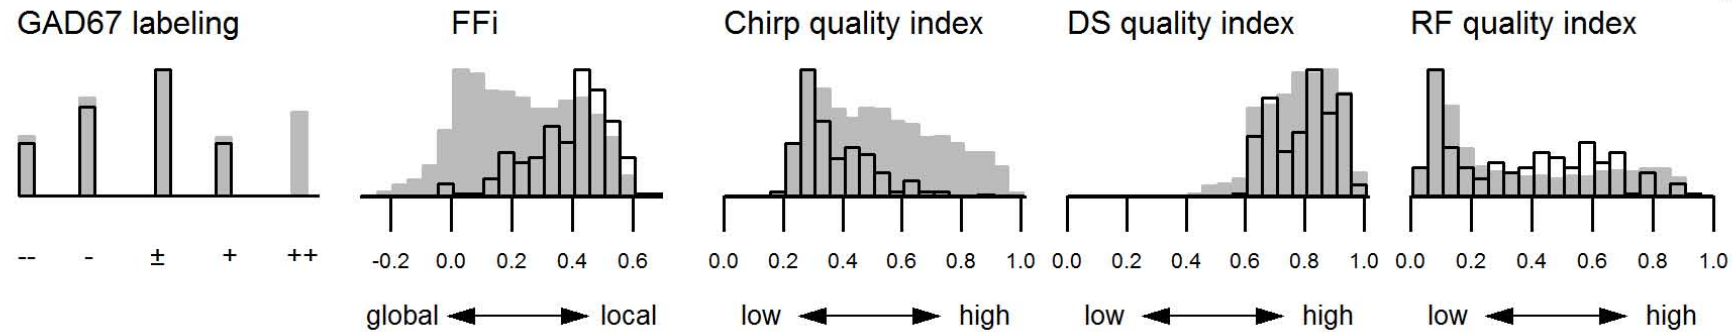

**d**

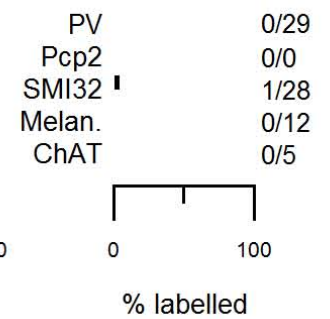

**Group 13 ONOFF DS 2**

n = 129 Cells, 1.62%, (2.57% of RGCs); CF: 2.3

SFig. 3-20 a

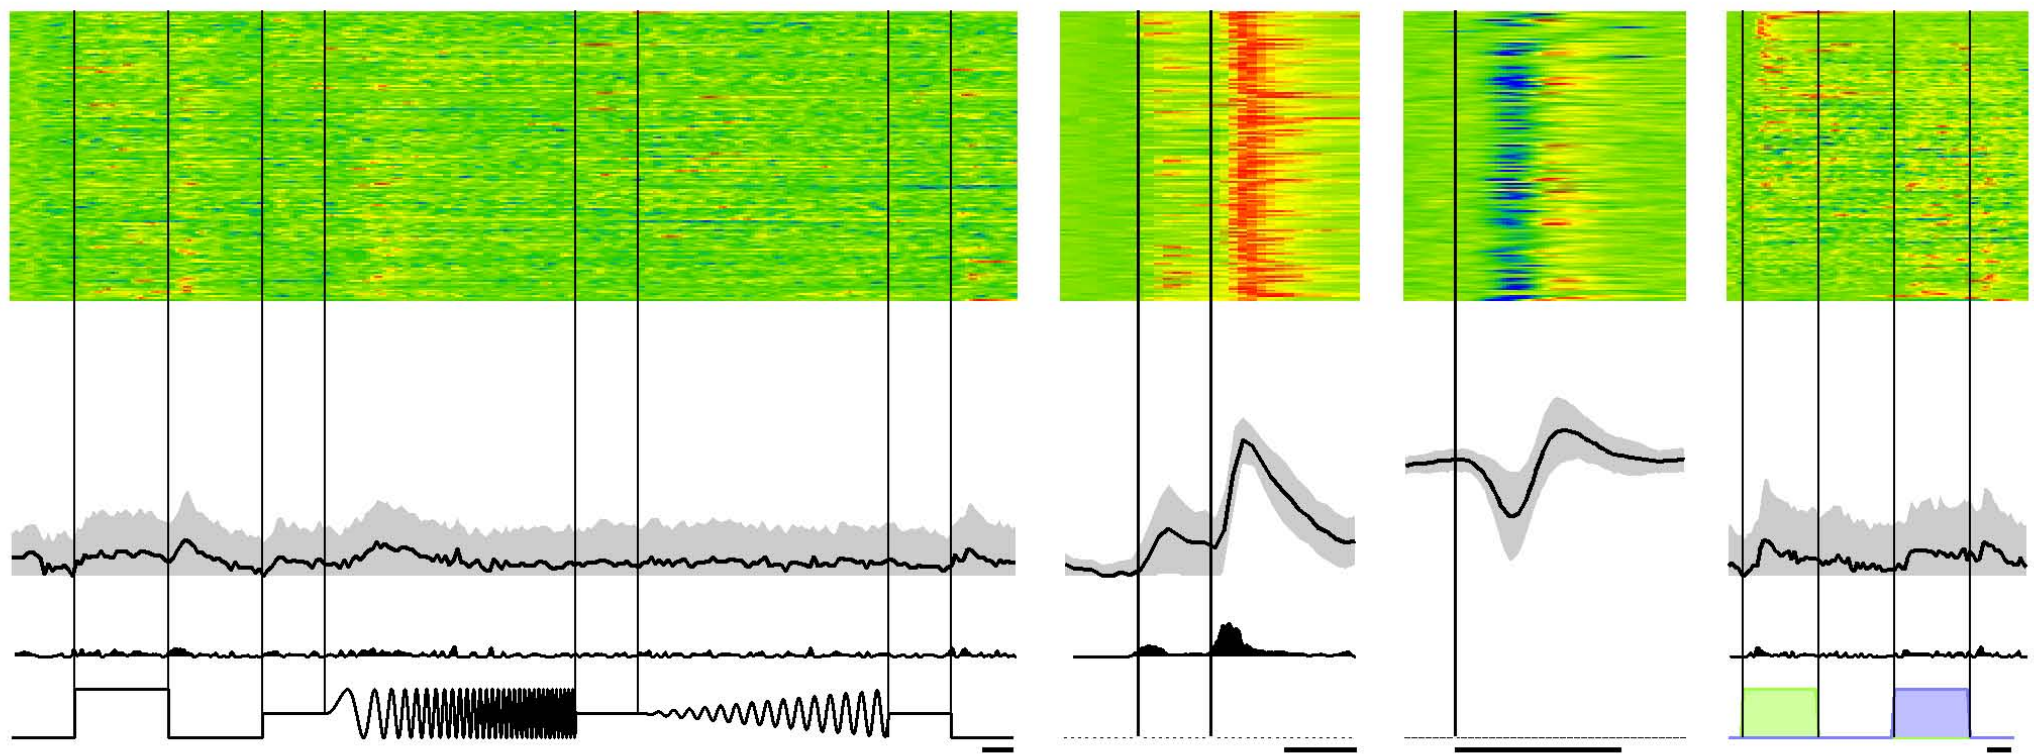

**b**

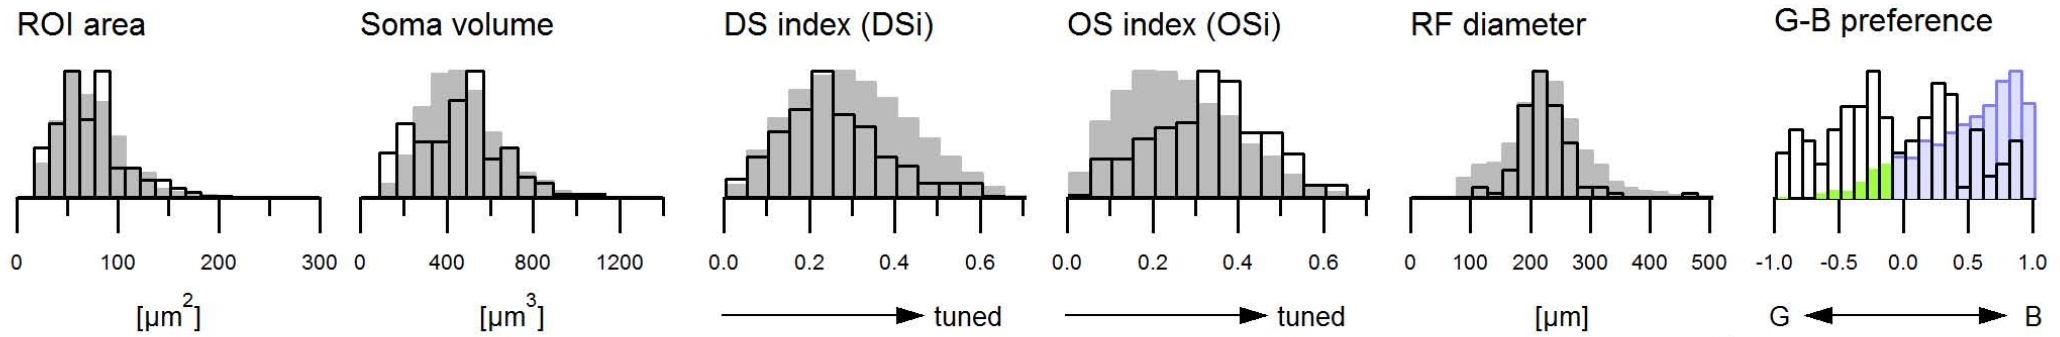

**c**

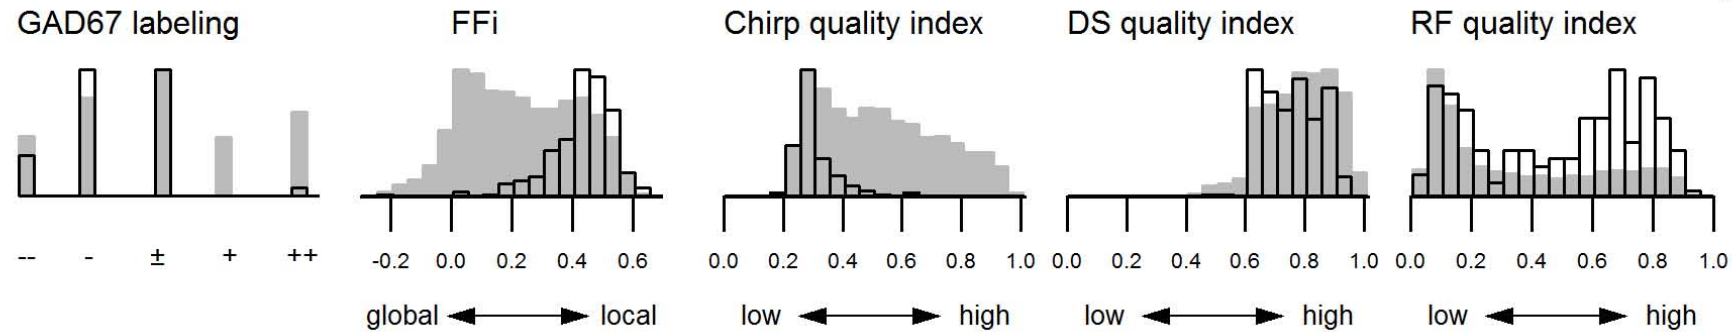

**d**

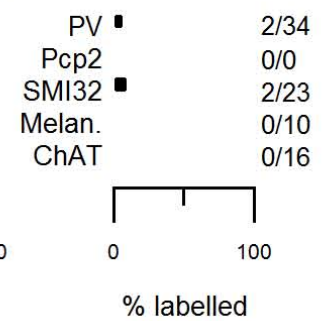

**Group 14 (ON-)OFF local, OS**  
 n = 150 Cells, 1.88%, (2.99% of RGCs); CF: 2.44



SFig. 3-21 a

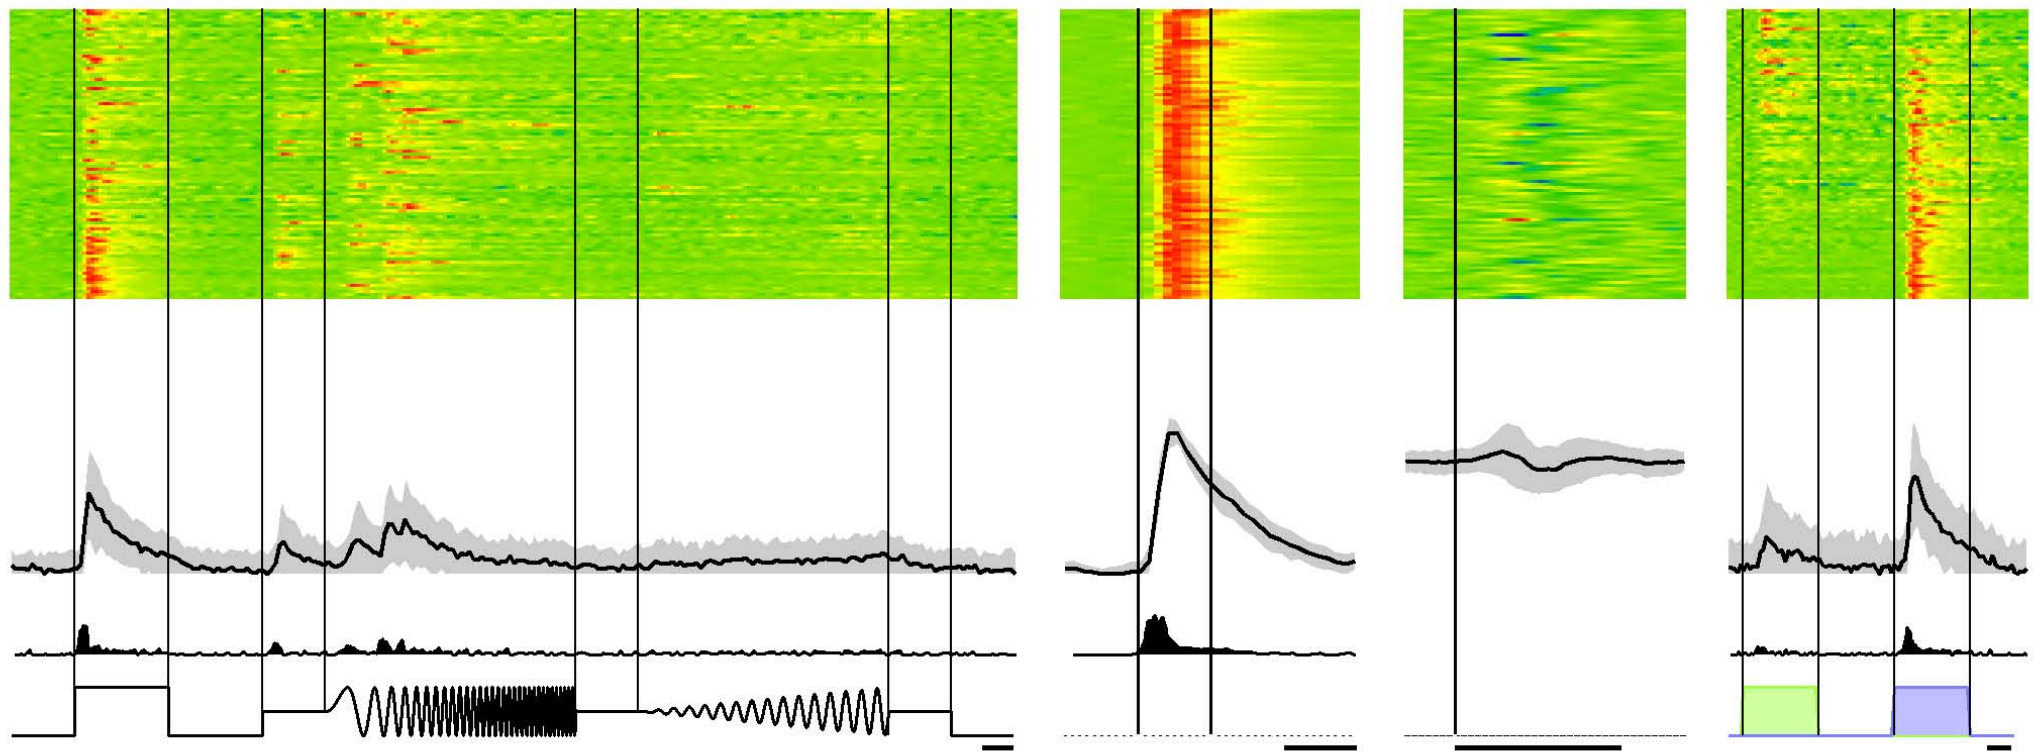

**b**

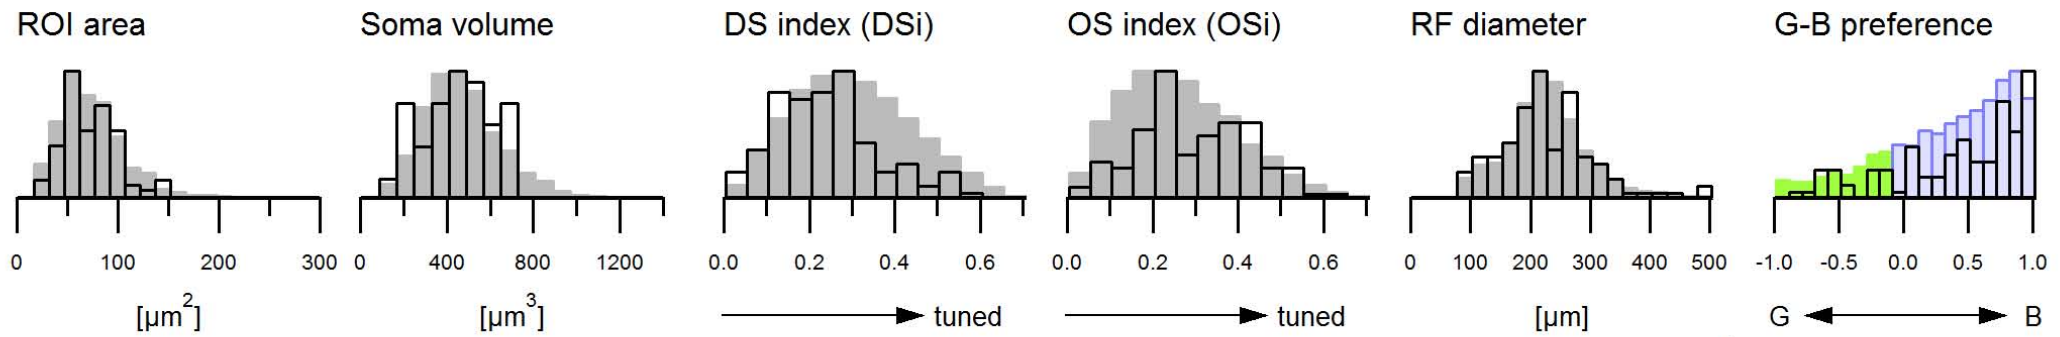

**c**

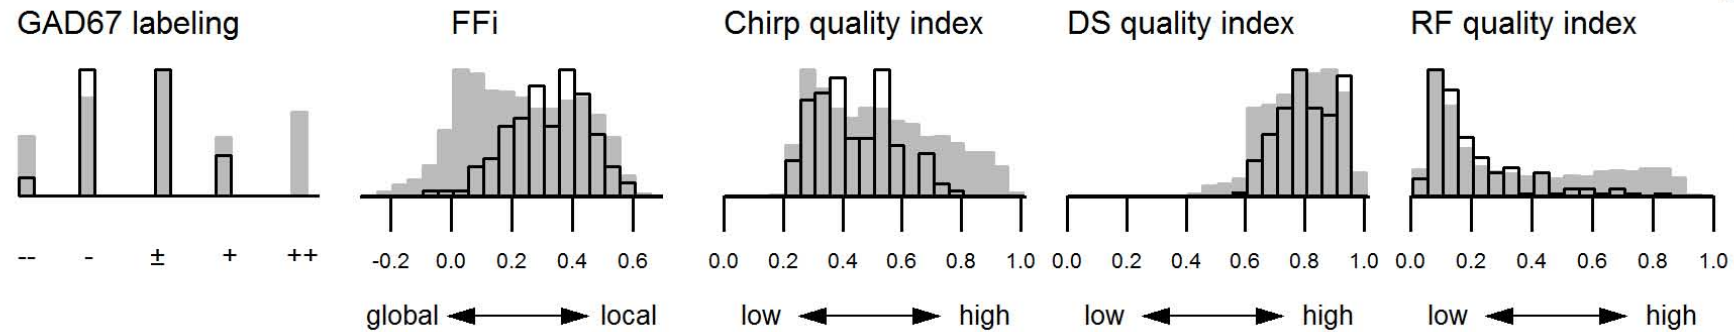

**d**

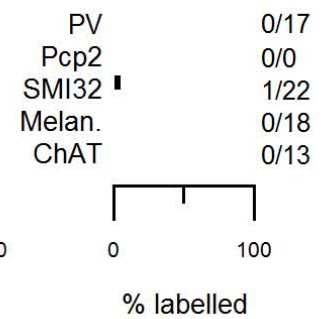

**Group 15 ON step**

n = 97 Cells, 1.22%, (1.93% of RGCs); CF: 1.8

SFig. 3-22 a

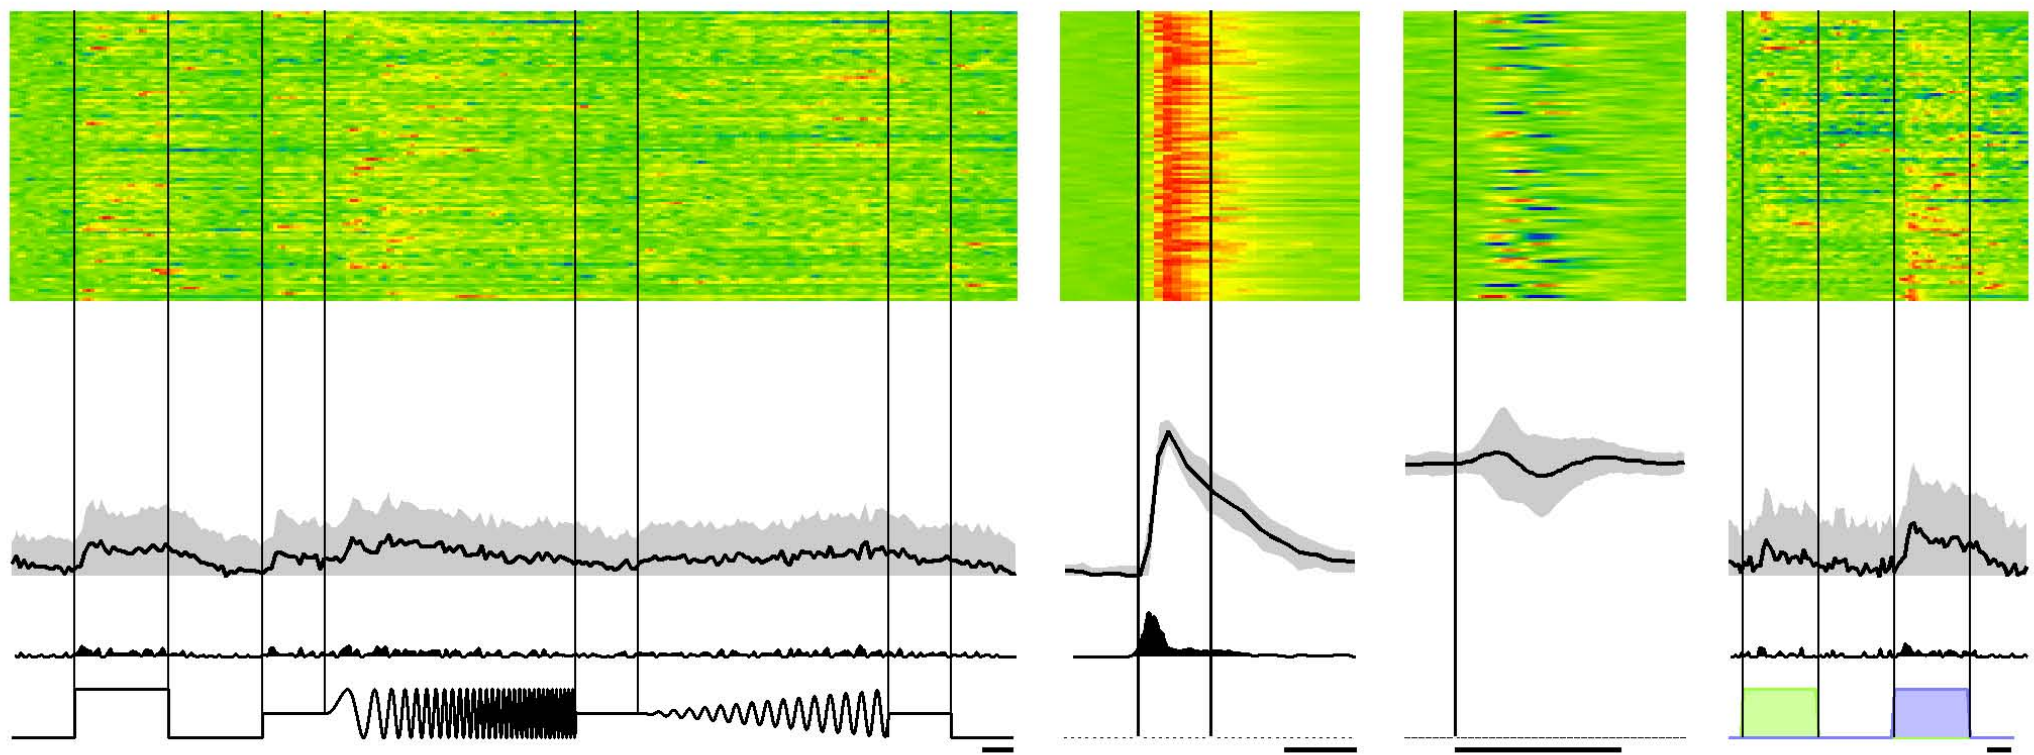

**b**

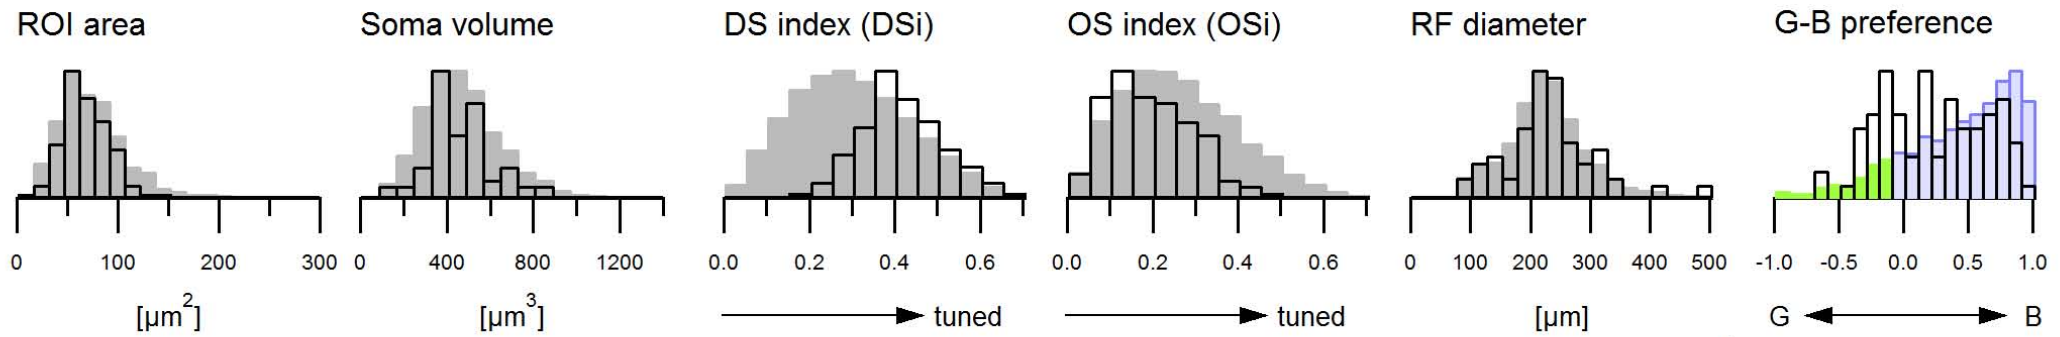

**c**

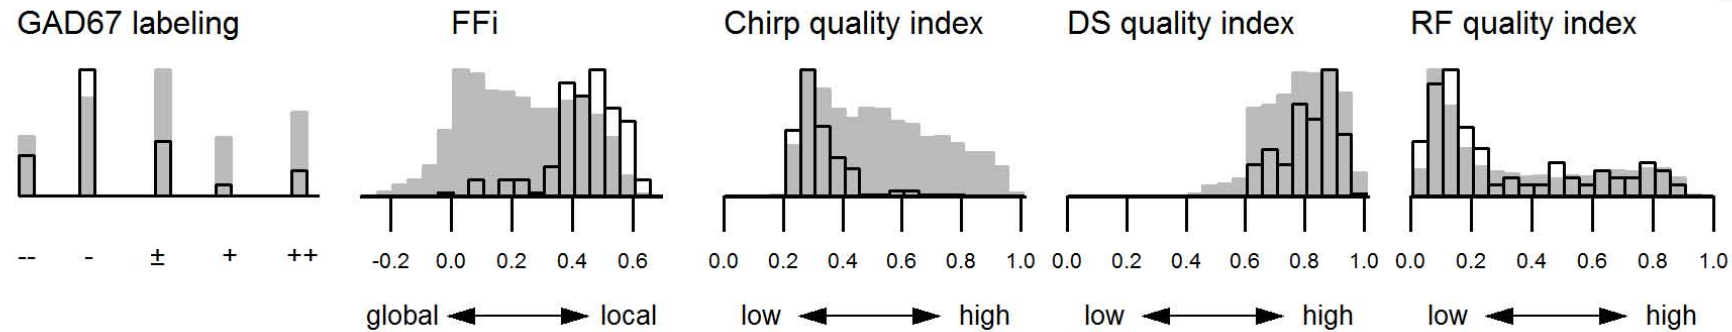

**d**

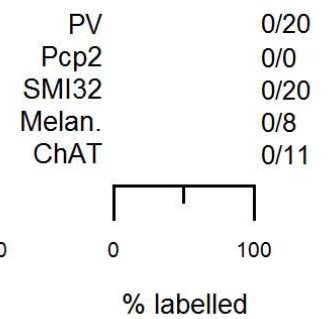

**Group 16** ON DS trans.

n = 99 Cells, 1.24%, (1.97% of RGCs); CF: 1.63



SFig. 3-23 a

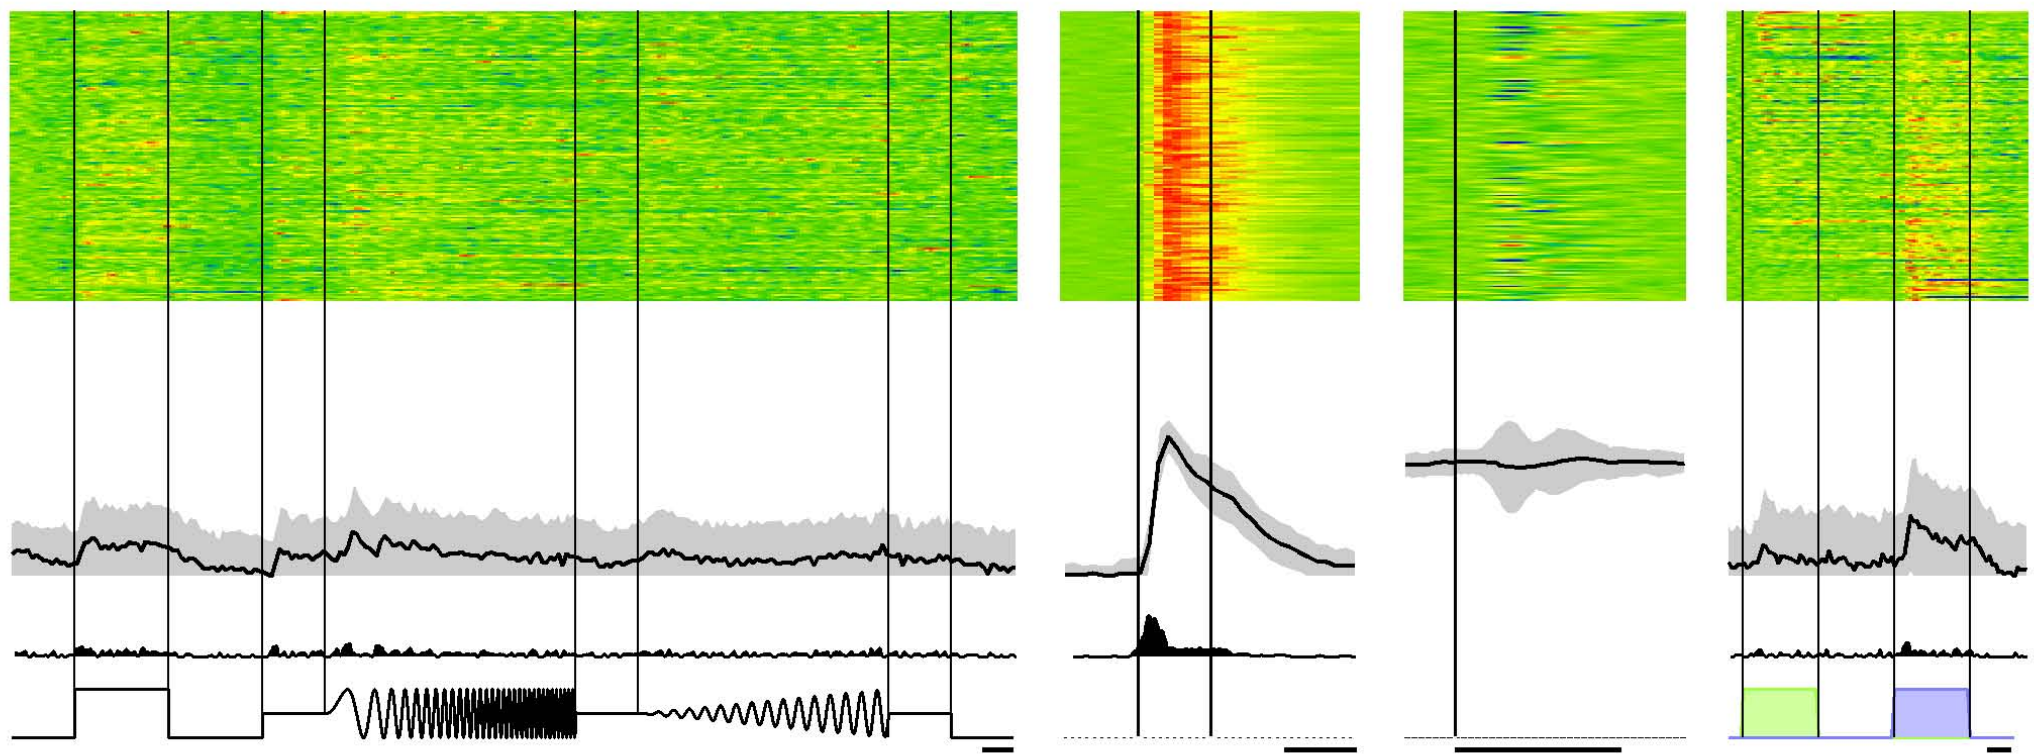

**b**

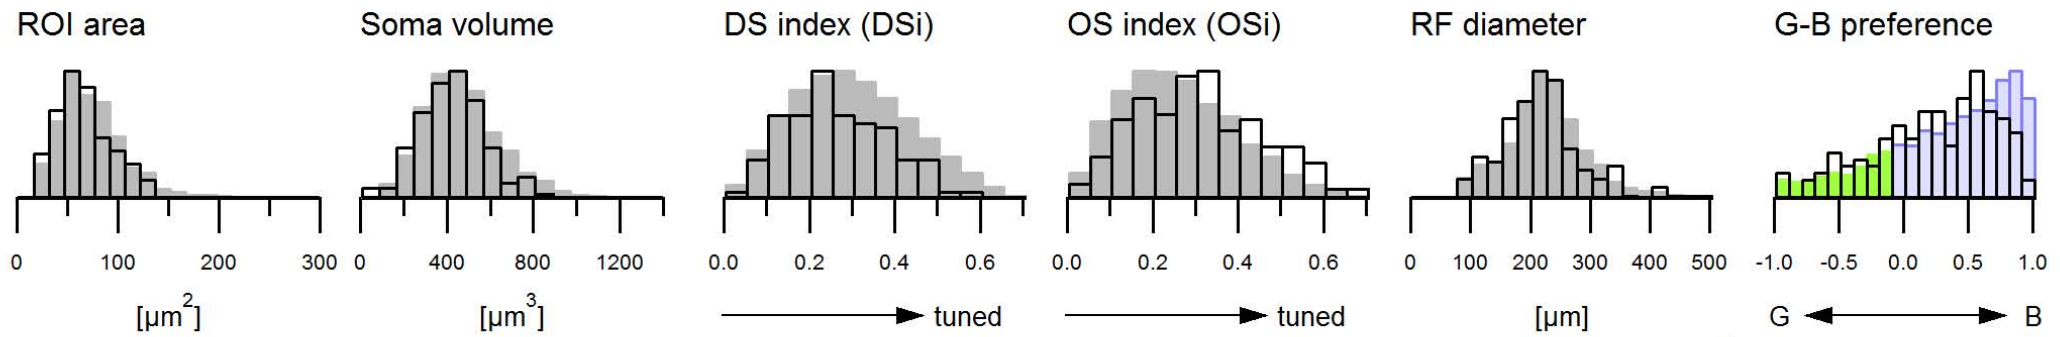

**c**

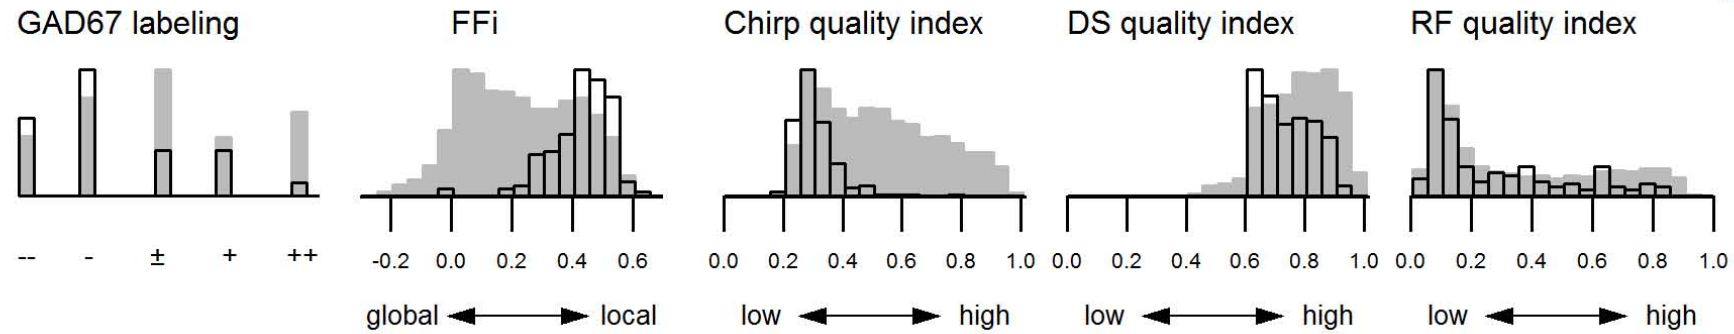

**d**

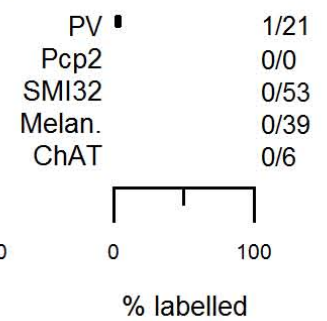

**Group 17** ON local trans., OS (a)  
 n = 169 Cells, 2.12%, (3.36% of RGCs); CF: 2.7

SFig. 3-24 a

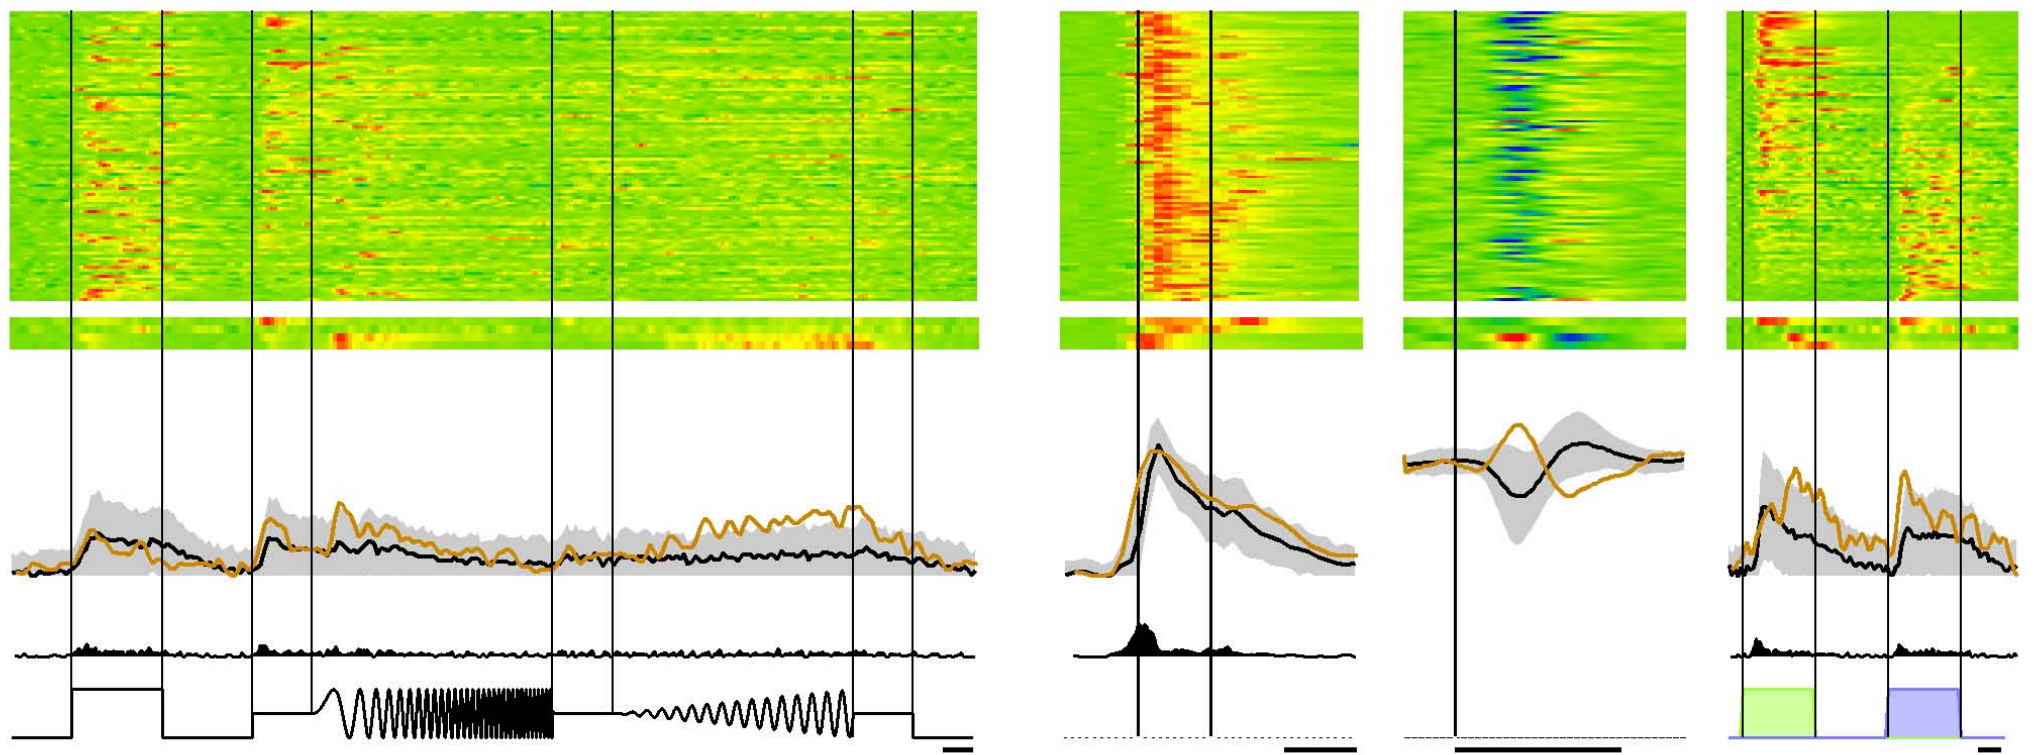

**b**

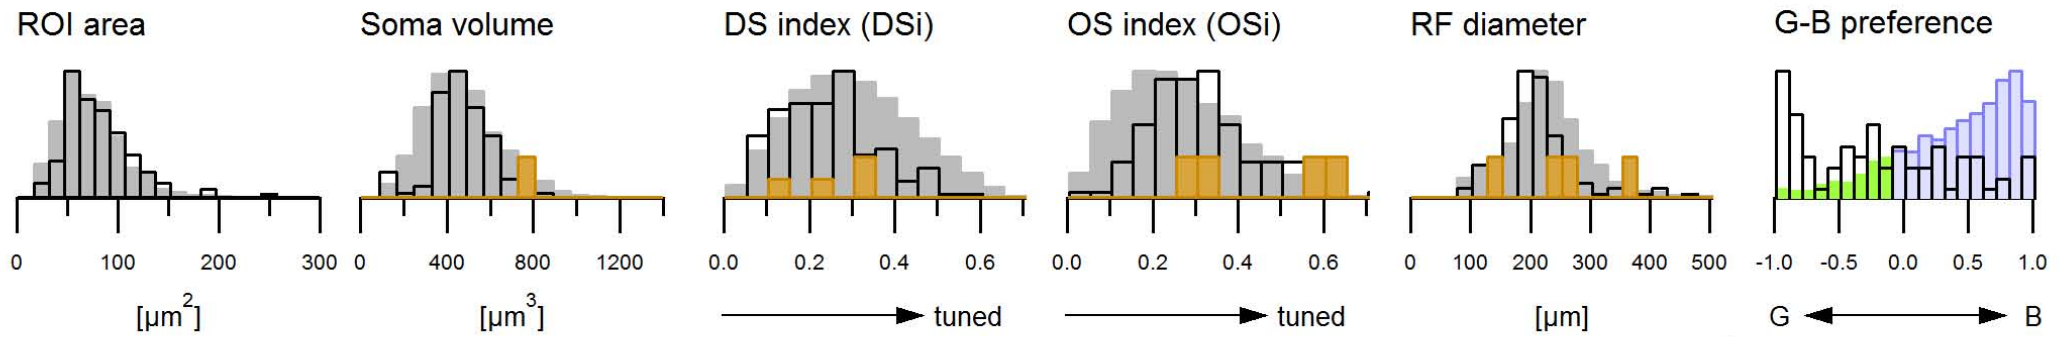

**c**

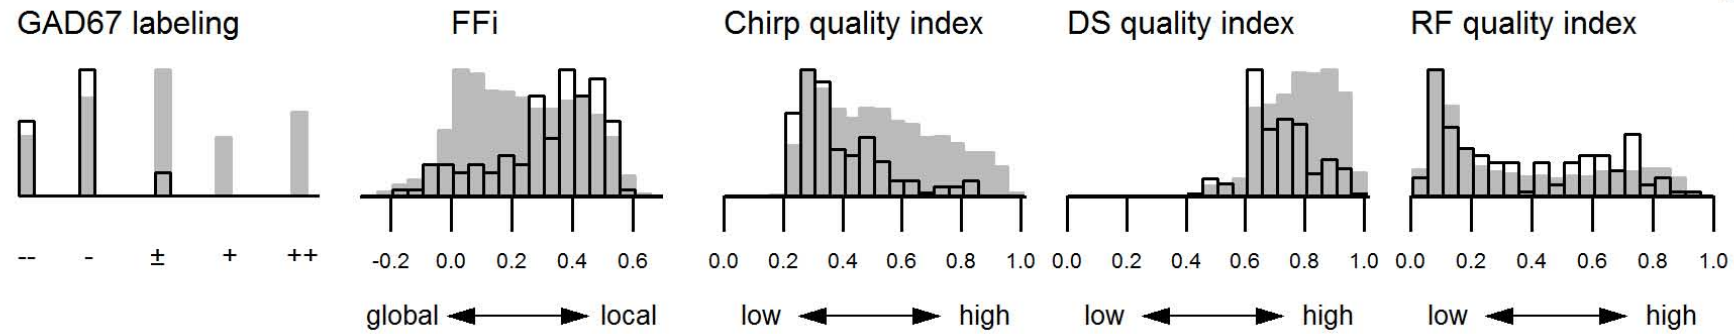

**d**

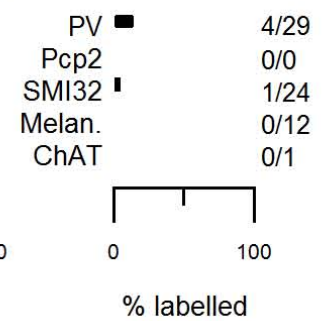

**Group 17** ON local trans., OS (b)

n = 99 Cells, 1.24%, (1.97% of RGCs); CF: 1.41



SFig. 3-25 a

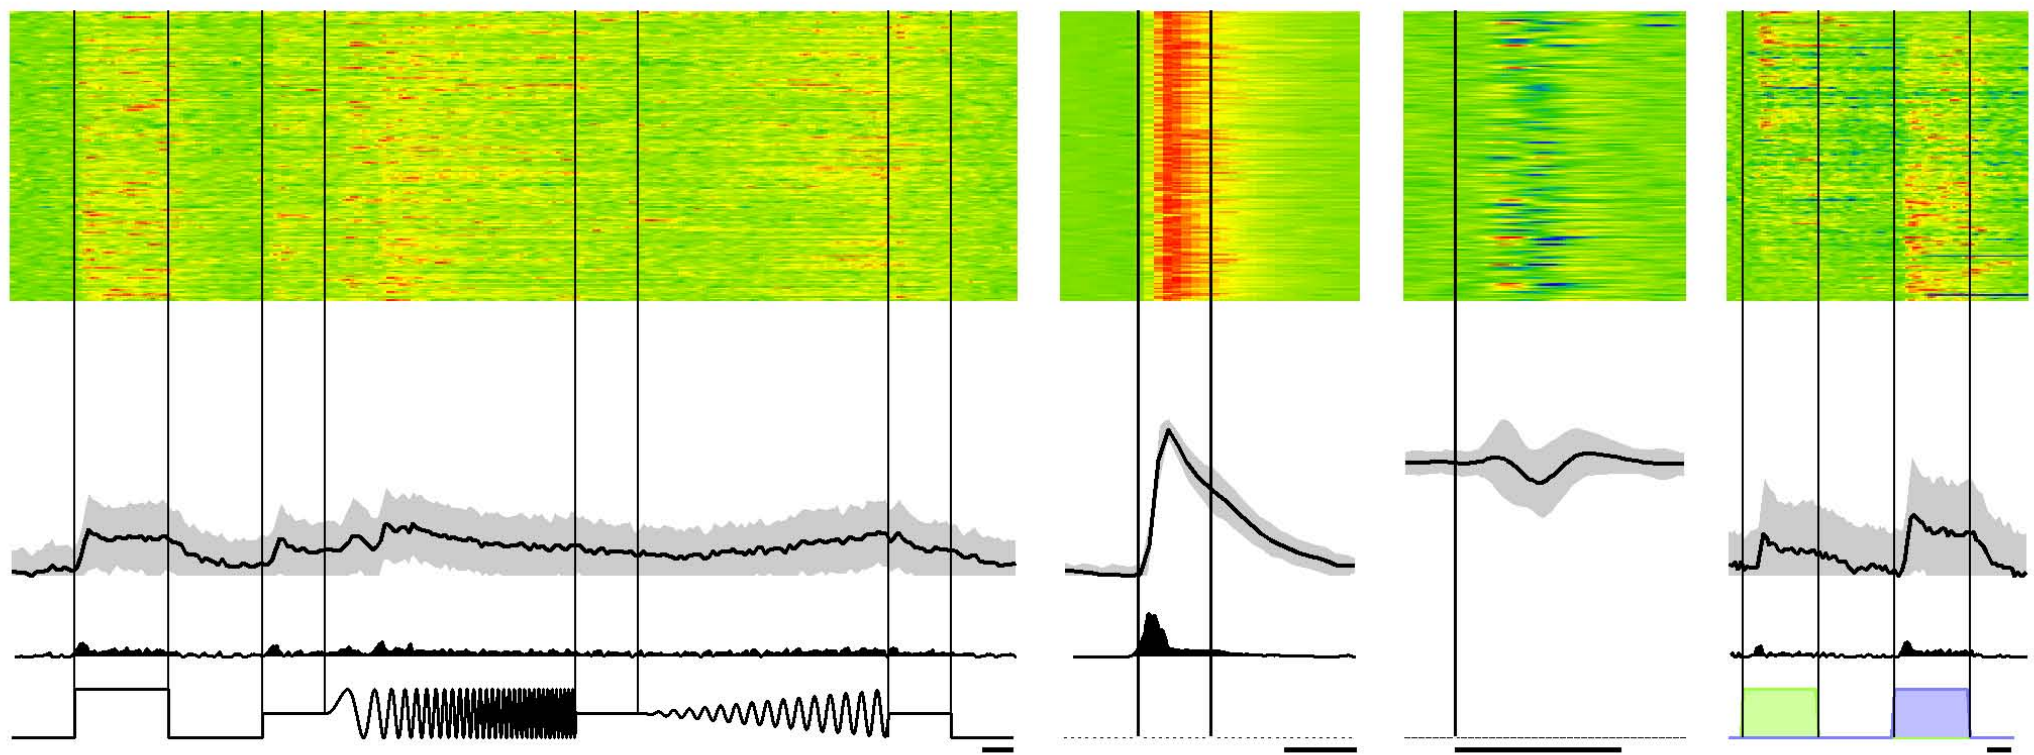

**b**

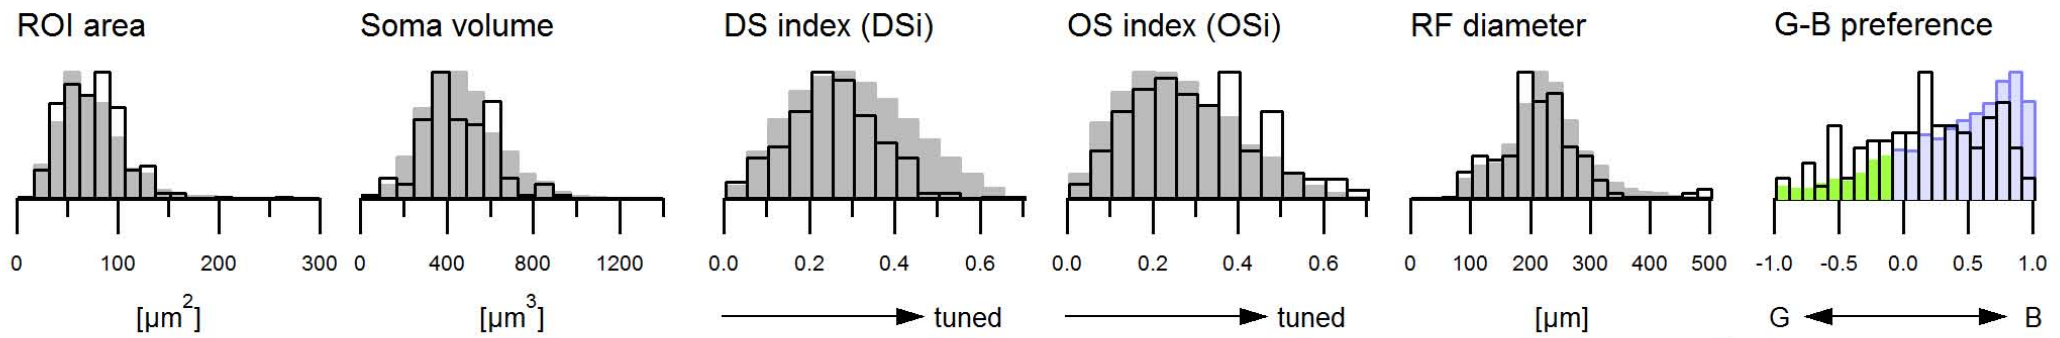

**c**

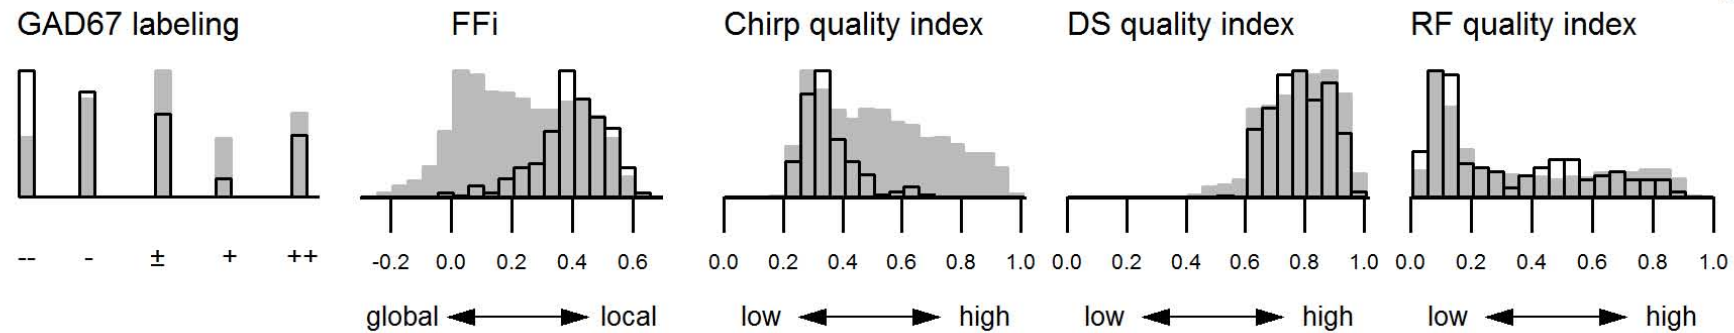

**d**

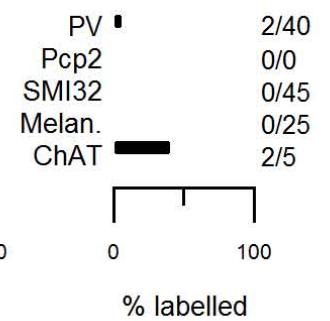

**Group 17** ON local trans., OS (c)  
 n = 171 Cells, 2.14%, (3.4% of RGCs); CF: 2.94

SFig. 3-26 a

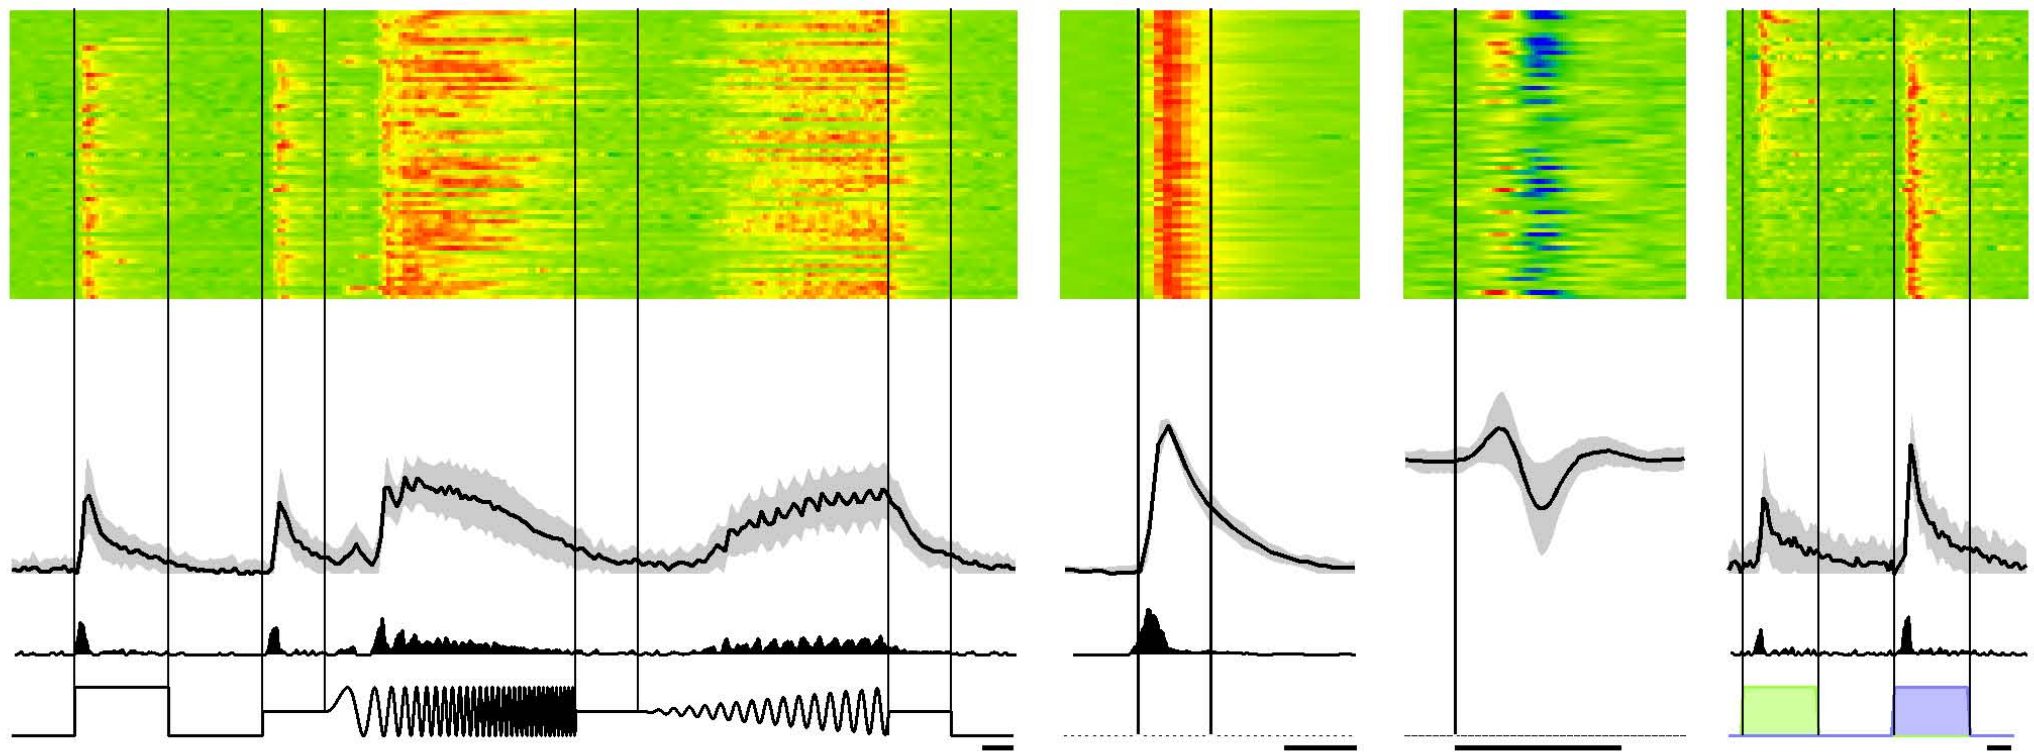

**b**

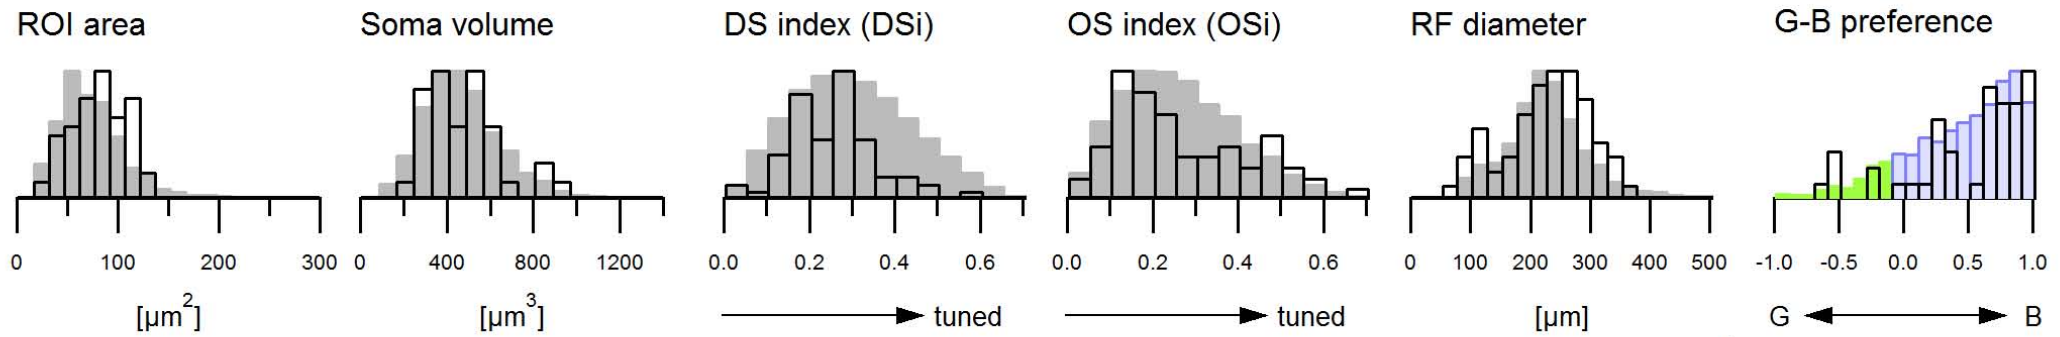

**c**

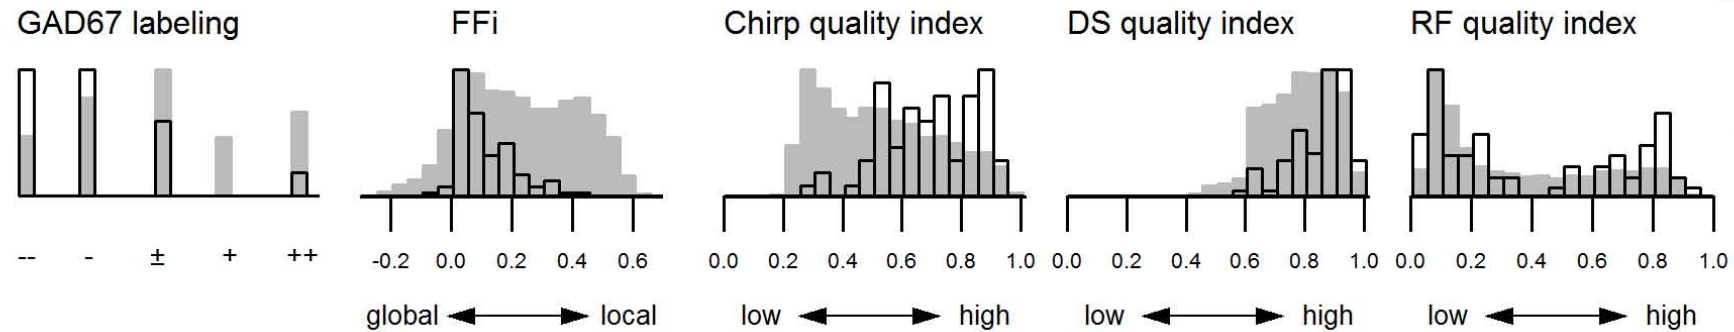

**d**

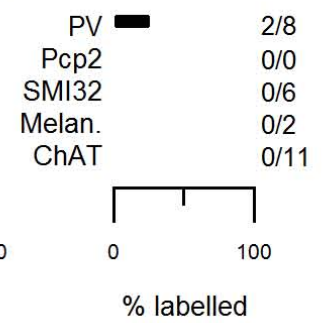

**Group 18 ON trans. (a)**

n = 65 Cells, 0.81%, (1.29% of RGCs); CF: 1.41



SFig. 3-27 a

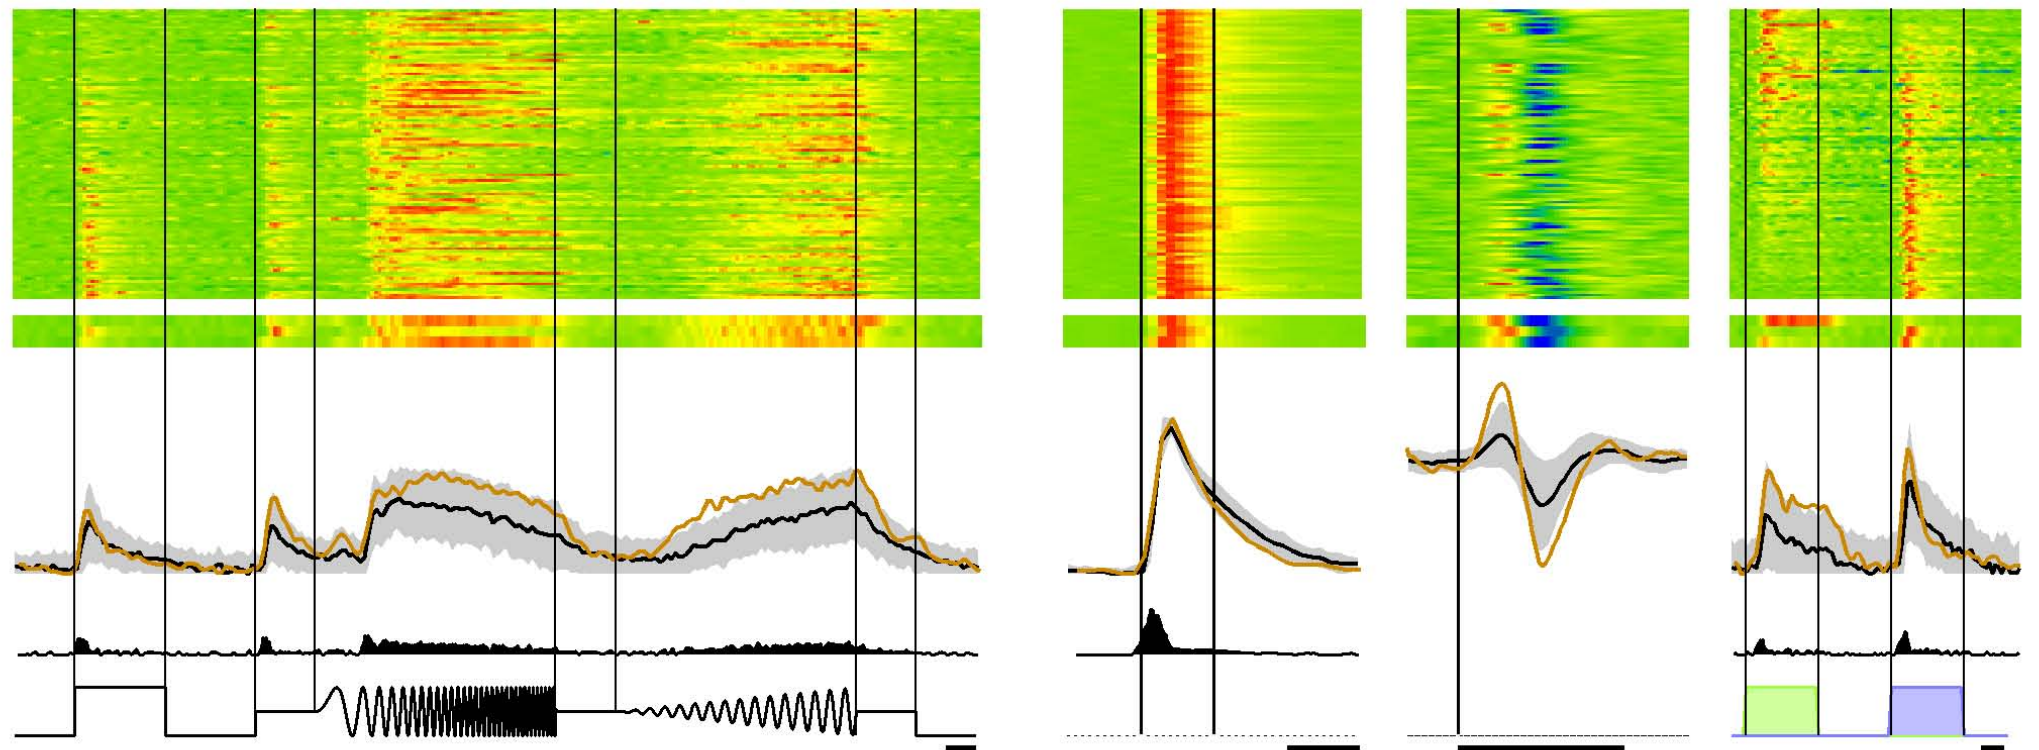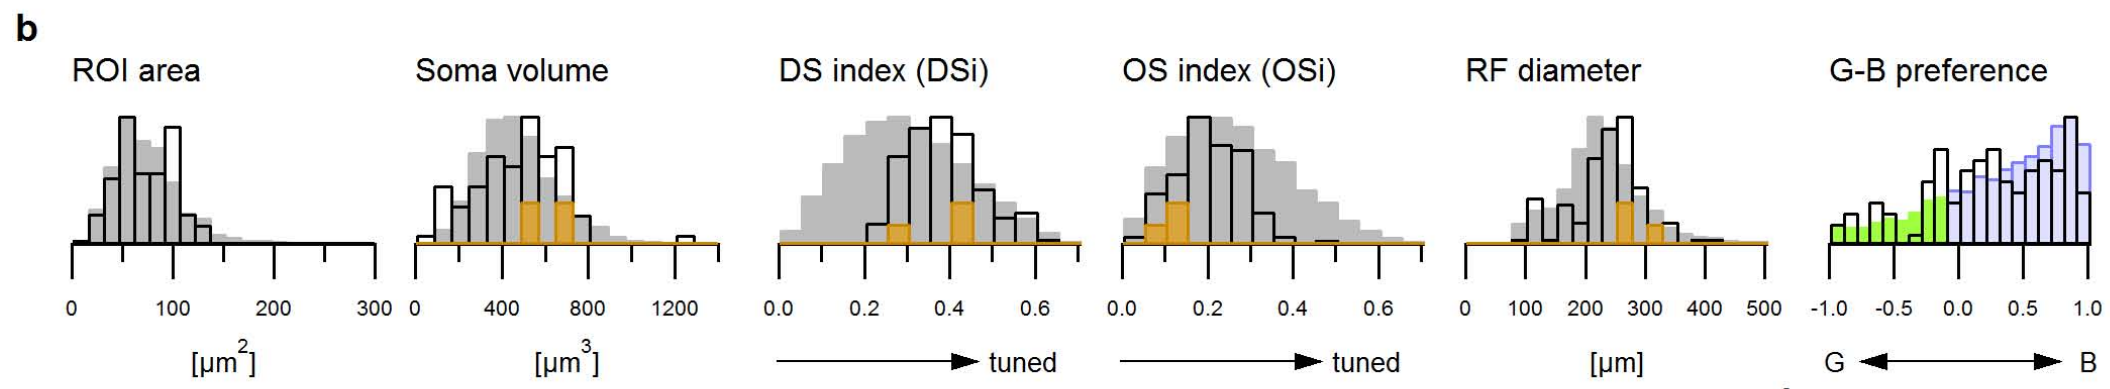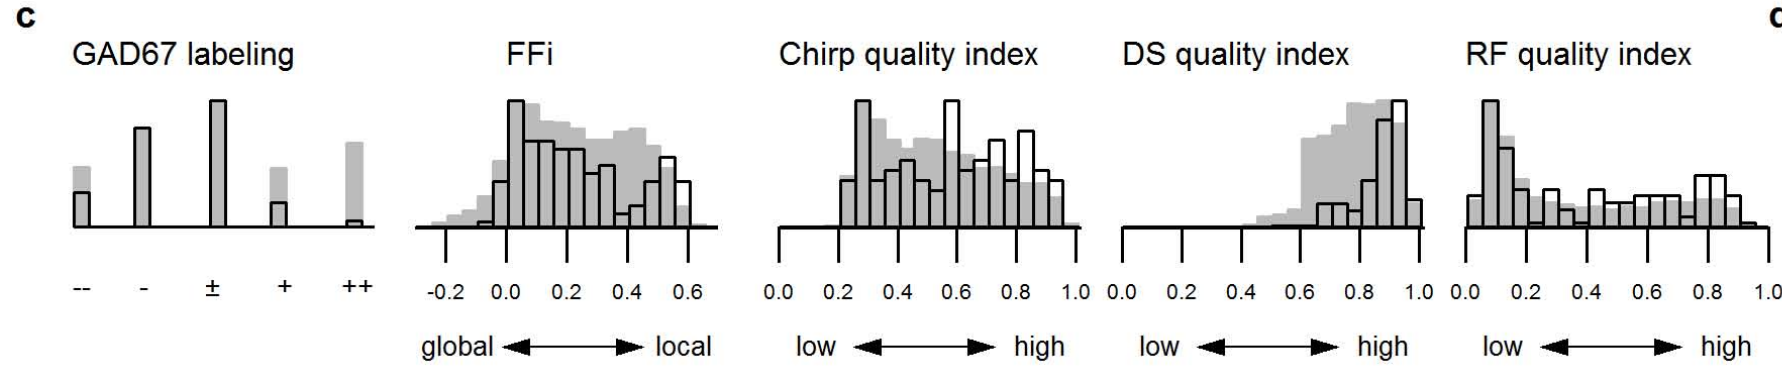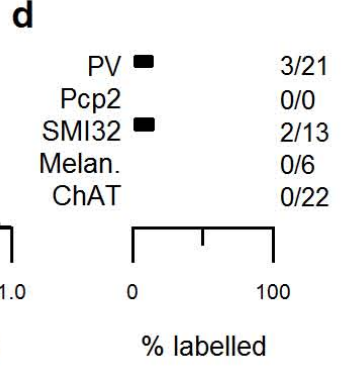

**Group 18 ON trans. (b)**  
 n = 106 Cells, 1.33%, (2.11% of RGCs); CF: 2.2

SFig. 3-28 a

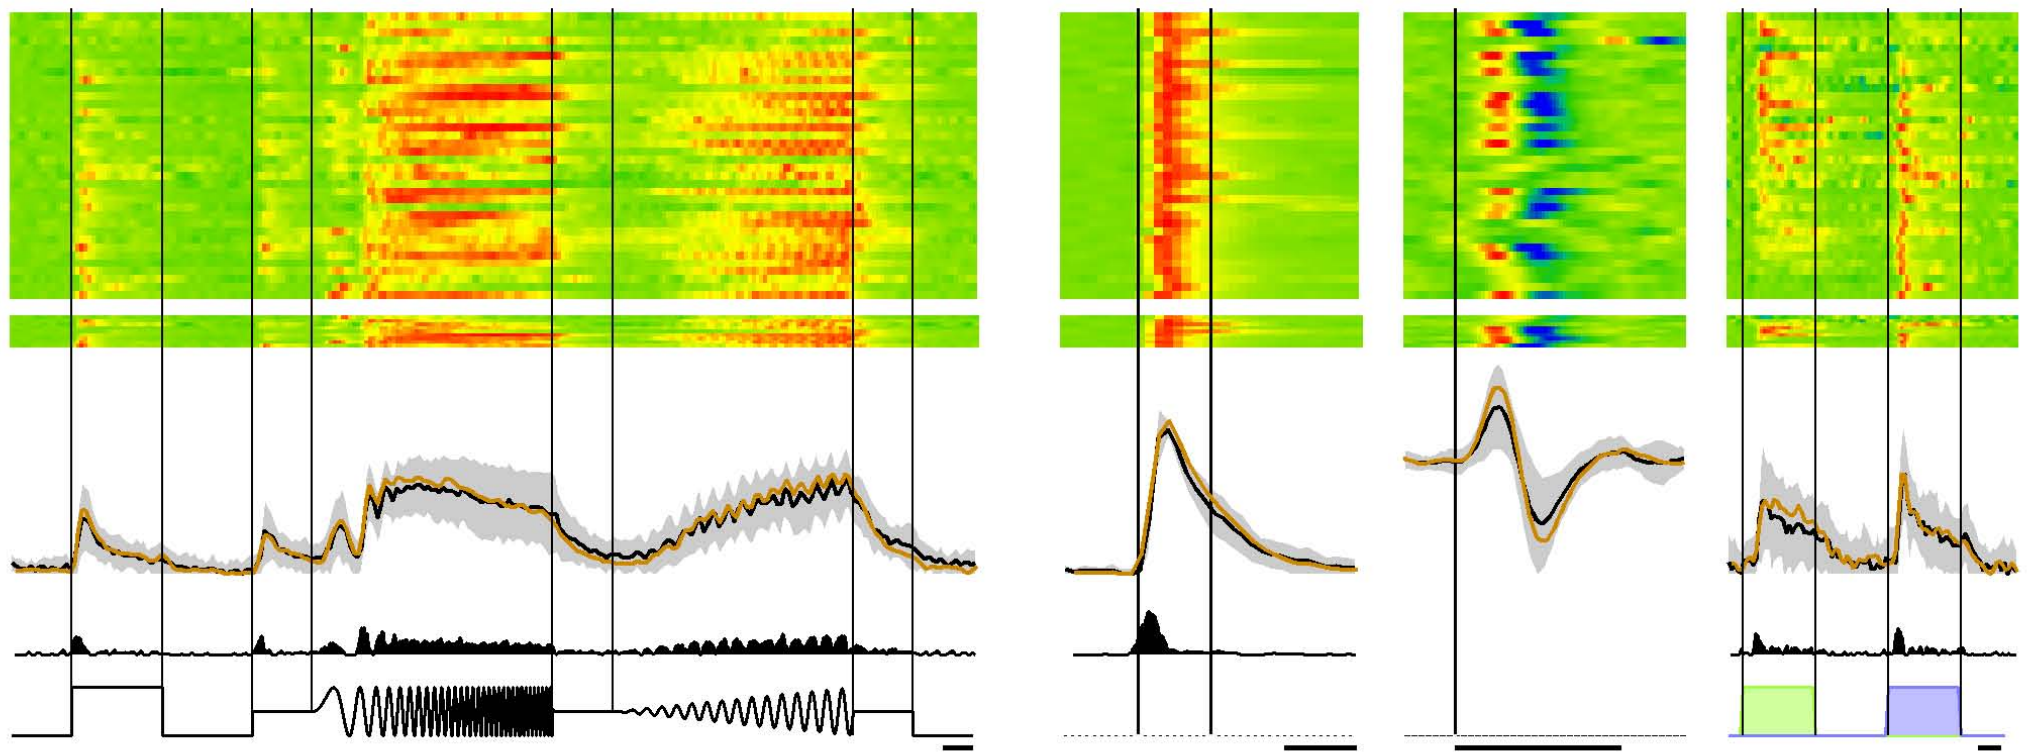

**b**

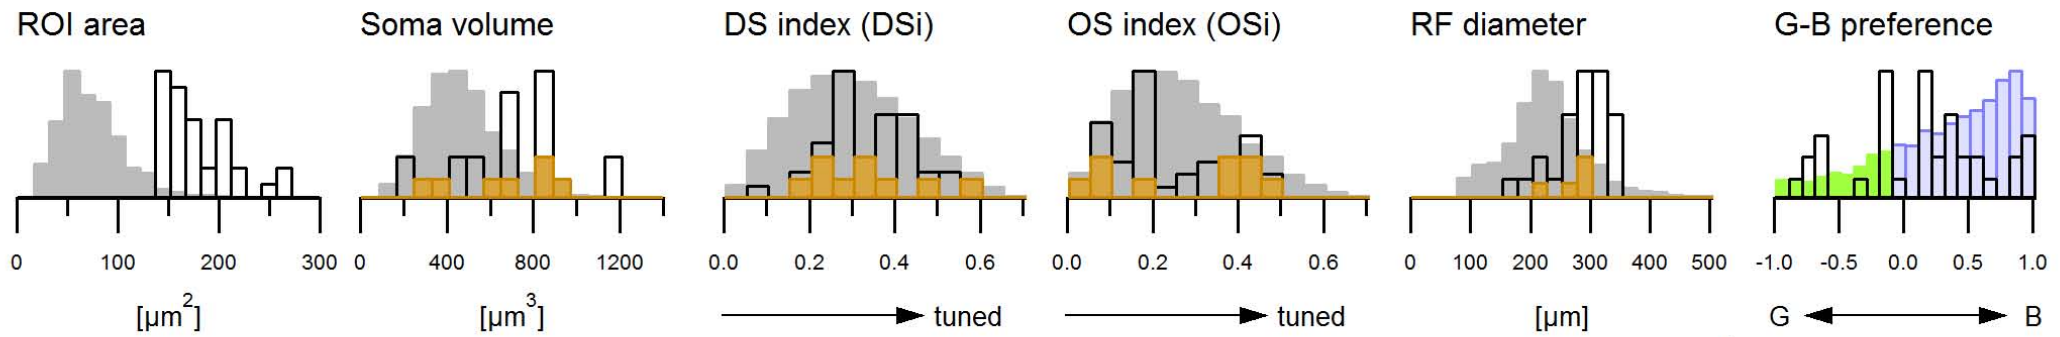

**c**

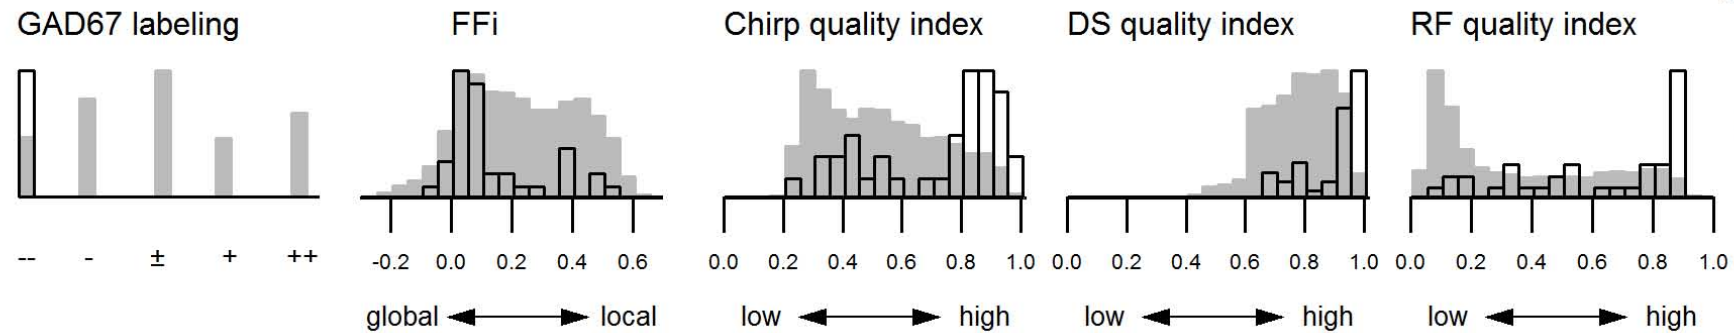

**d**

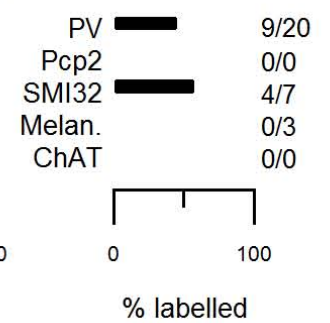

**Group 19** ON trans., large  
 n = 36 Cells, 0.45%, (0.72% of RGCs); CF: 0.97



SFig. 3-29 a

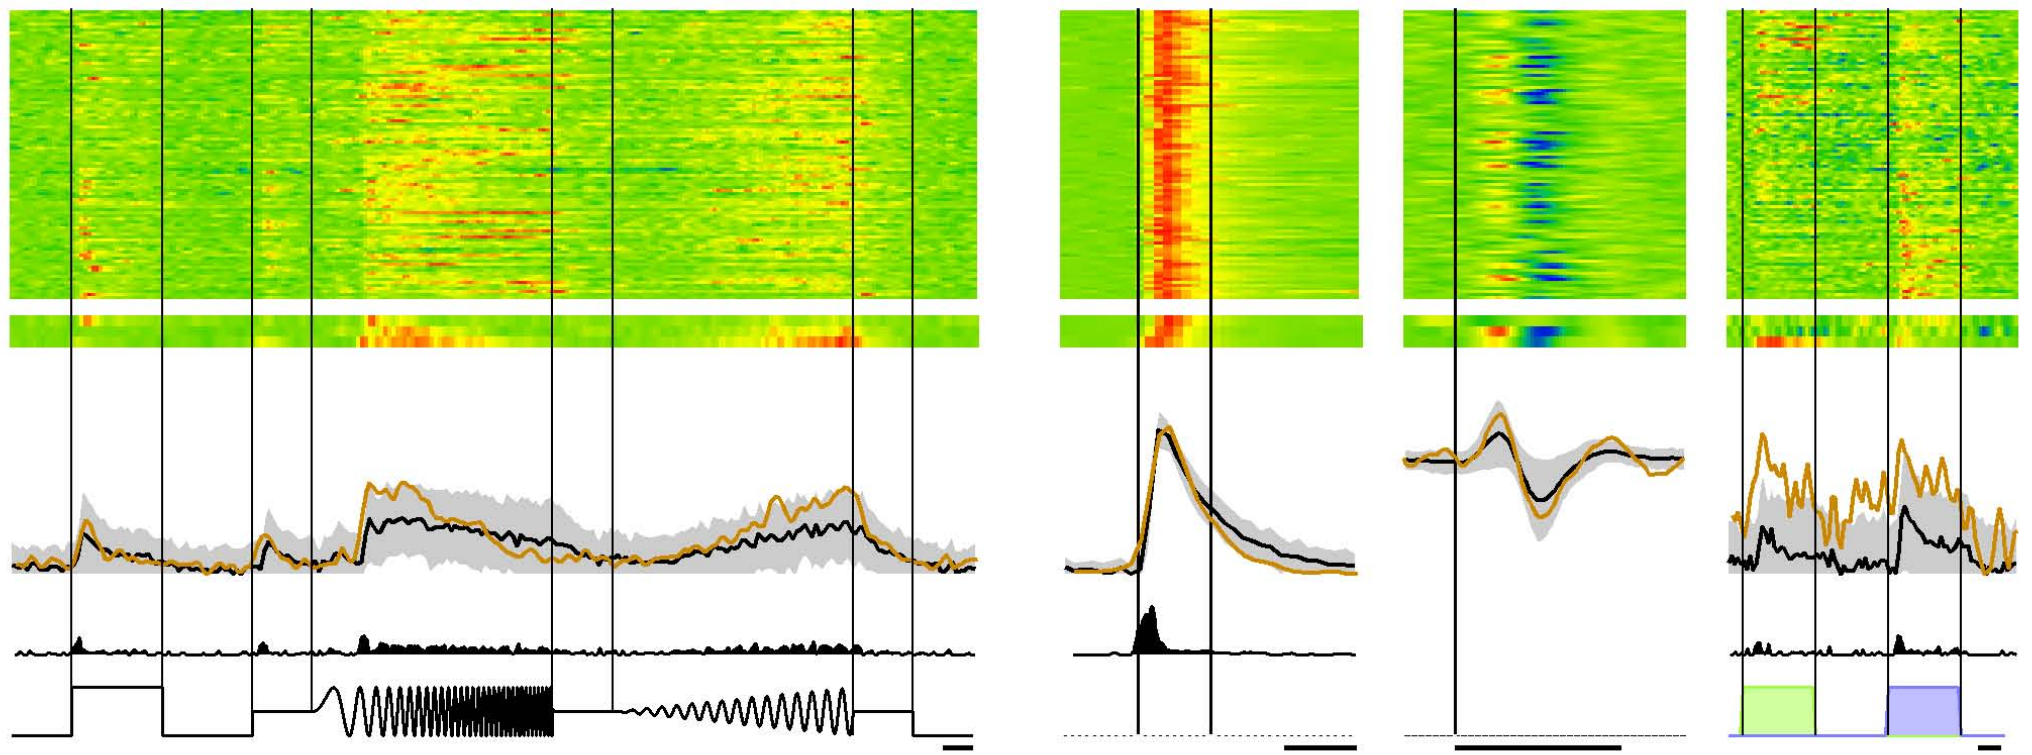

b

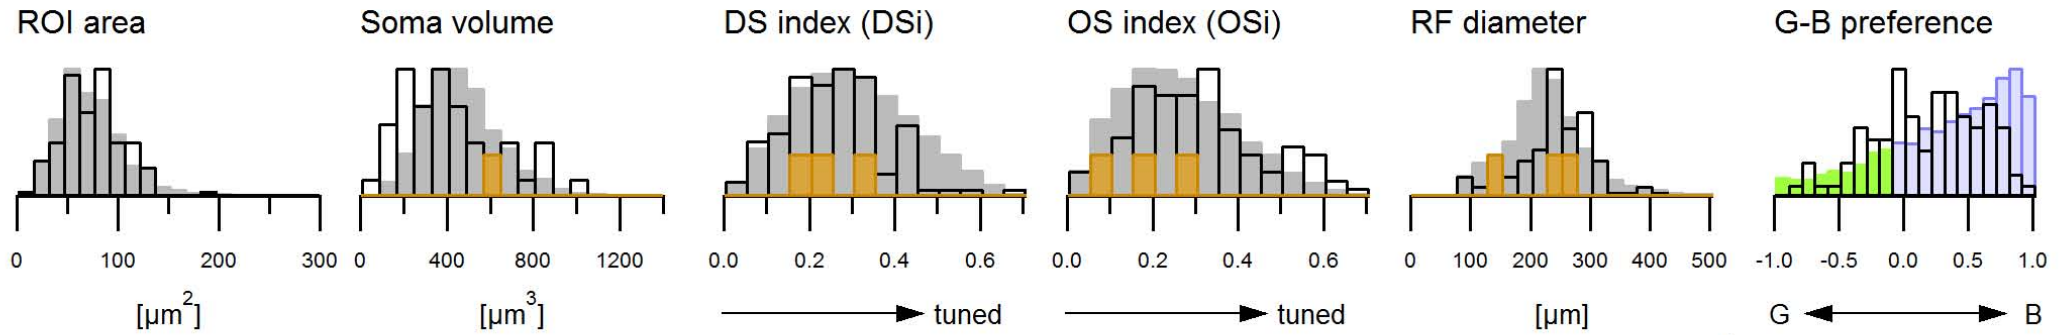

c

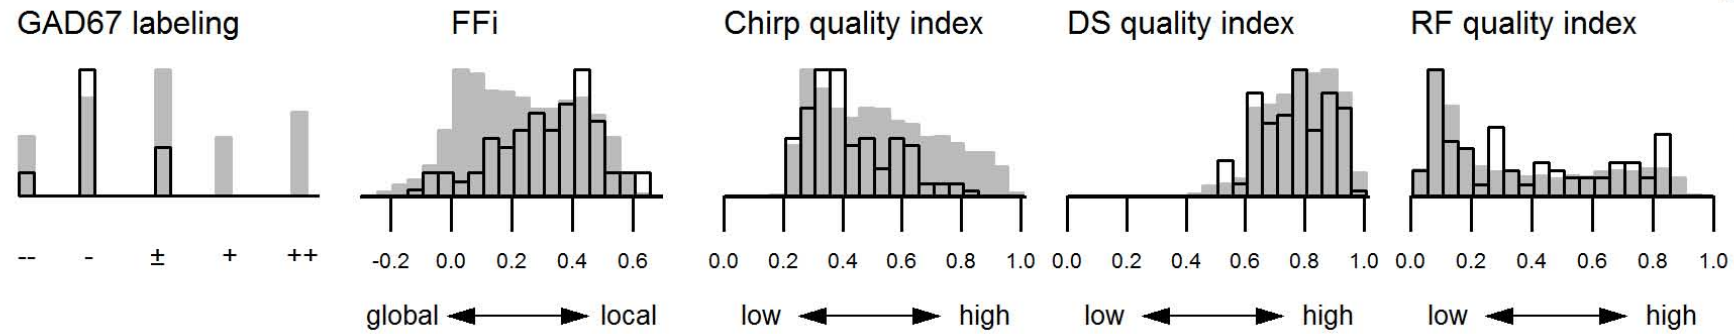

d

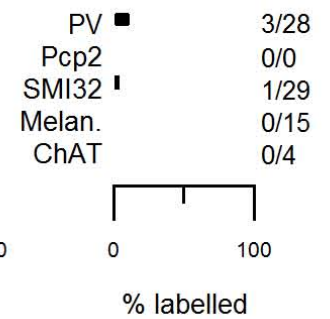

**Group 20** ON high freq.

n = 95 Cells, 1.19%, (1.89% of RGCs); CF: 1.94

SFig. 3-30 a

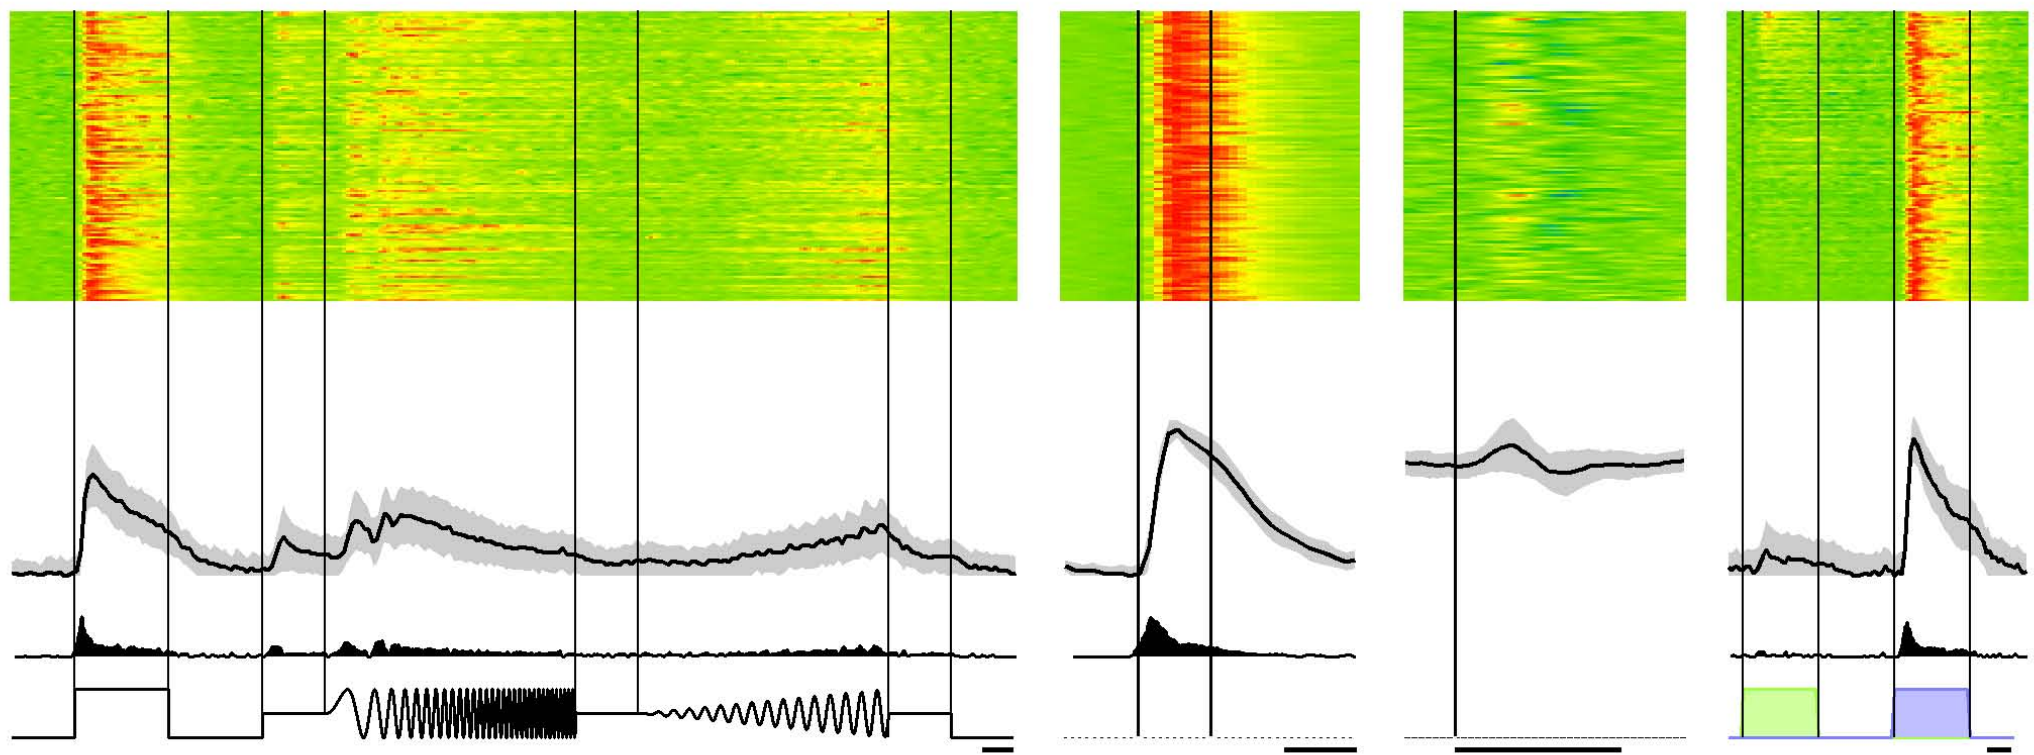

**b**

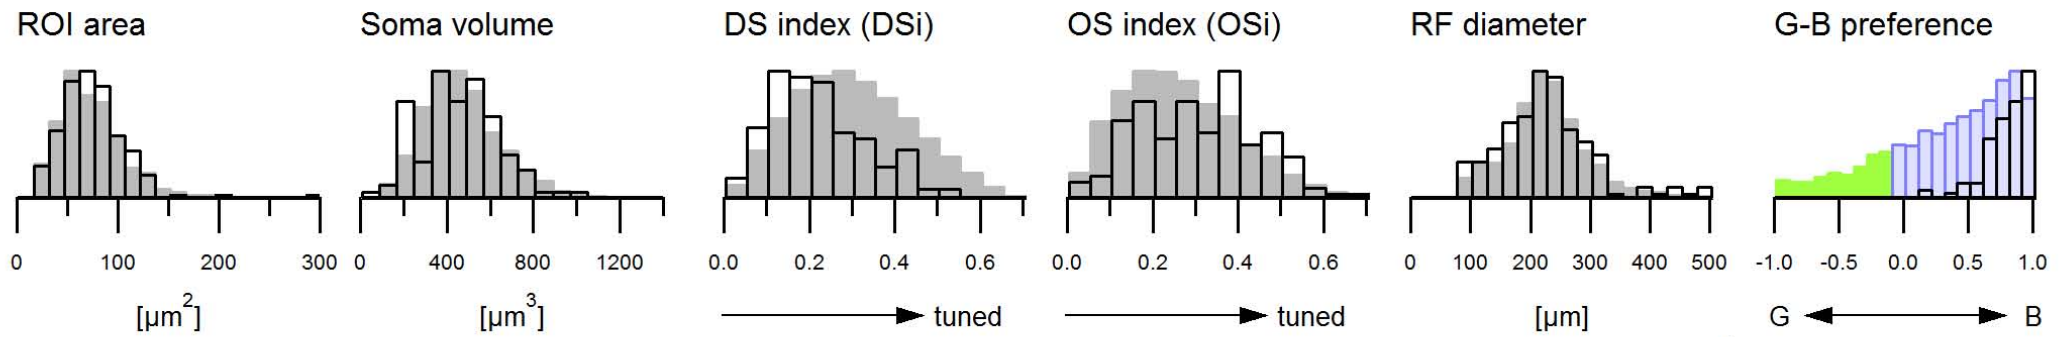

**c**

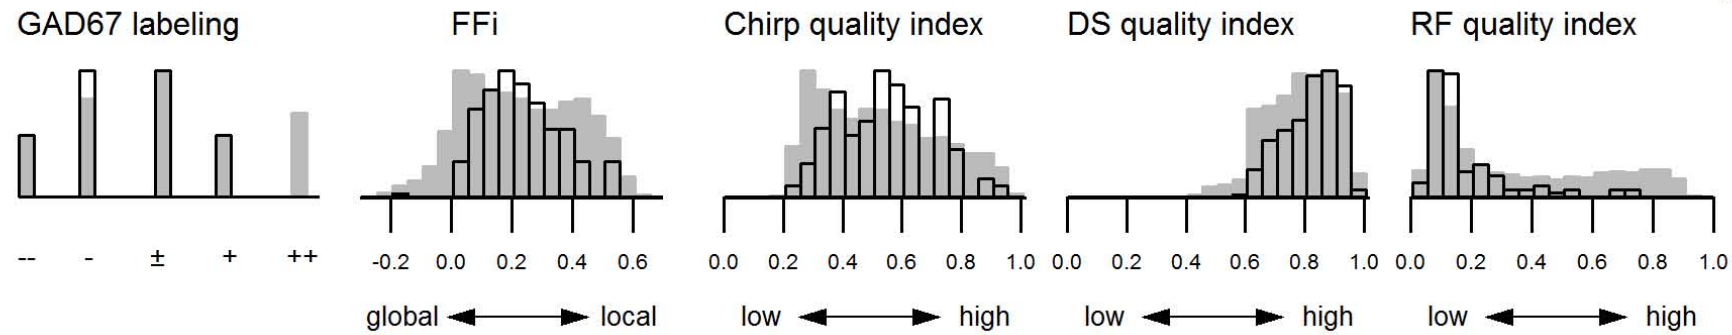

**d**

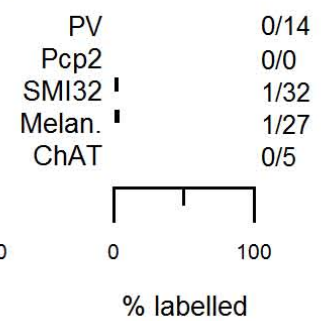

**Group 21** ON low freq.

n = 125 Cells, 1.57%, (2.49% of RGCs); CF: 2.38



SFig. 3-31 a

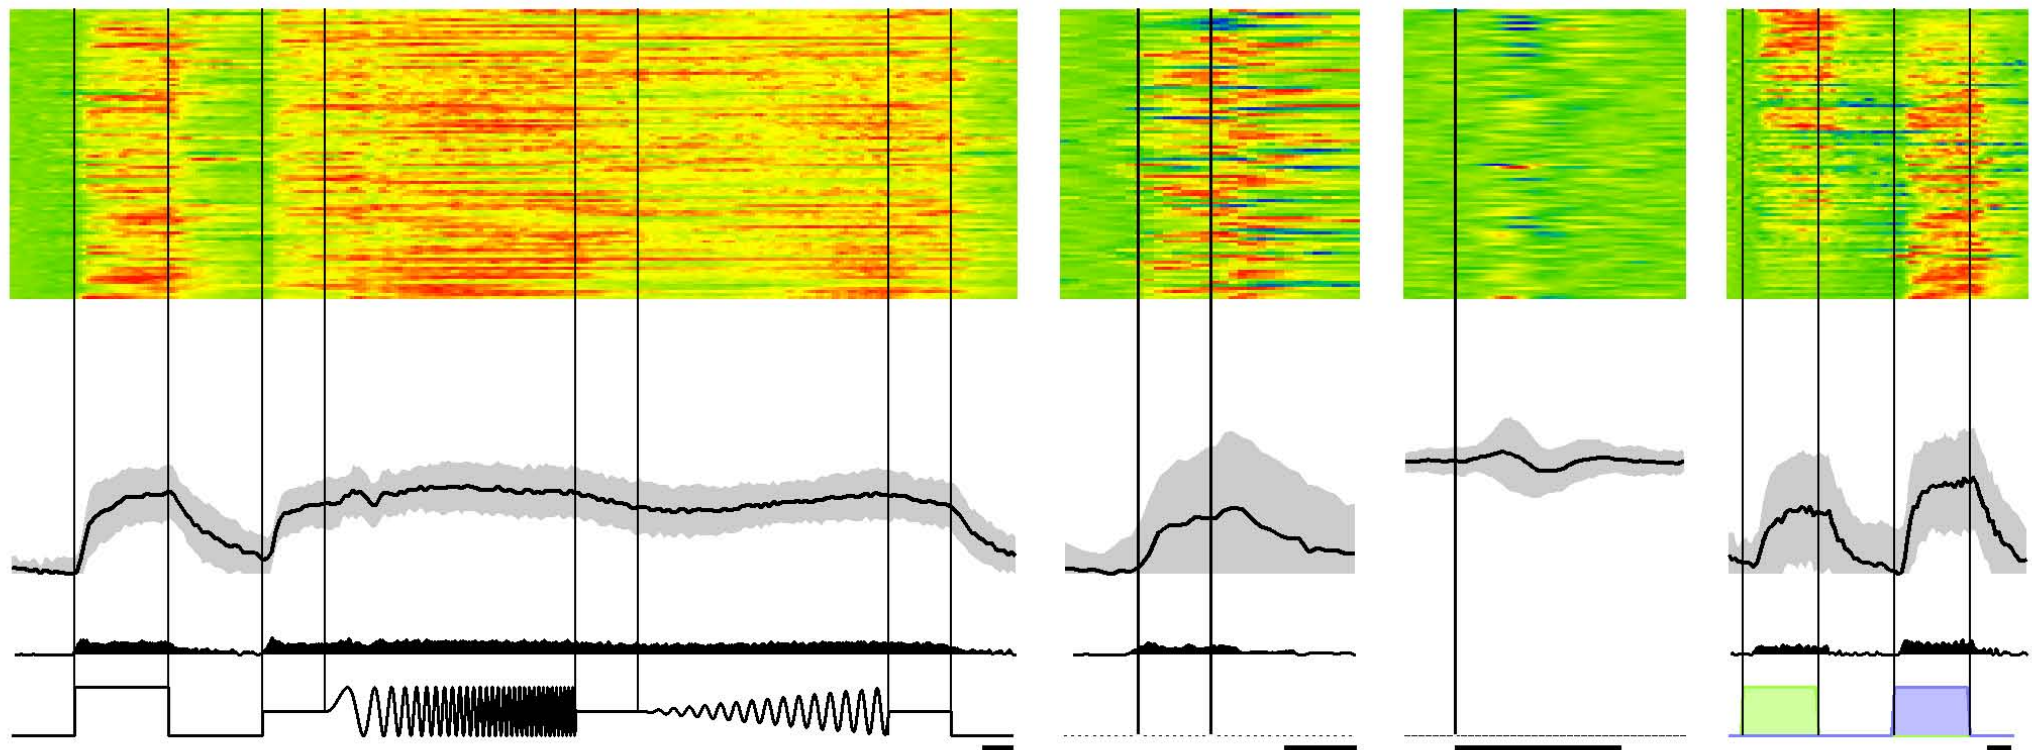

**b**

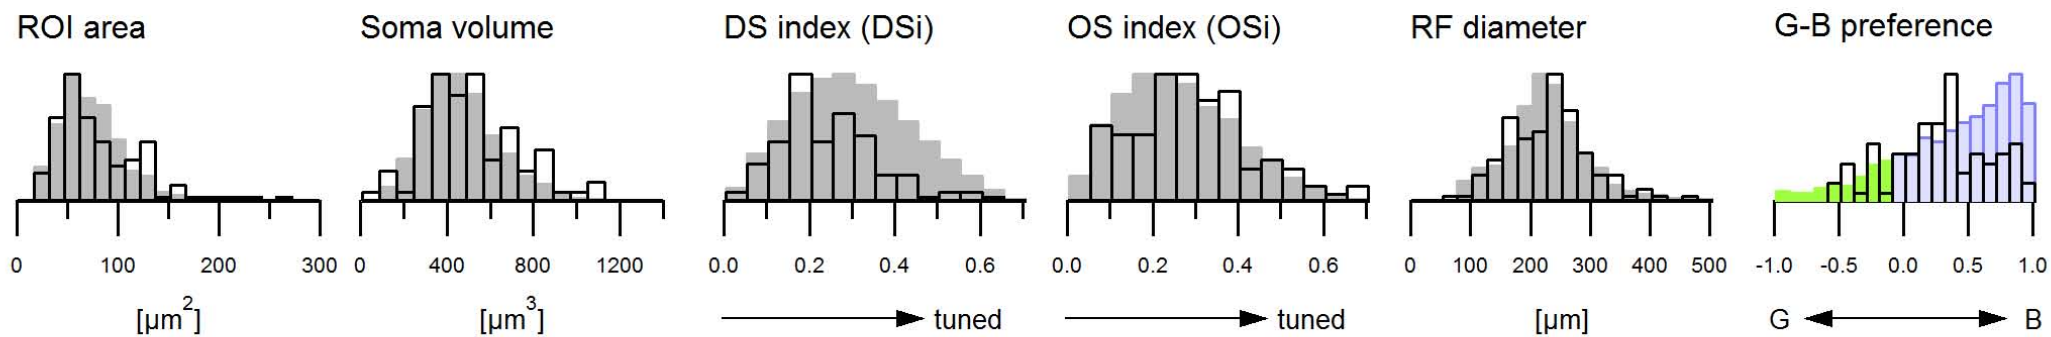

**c**

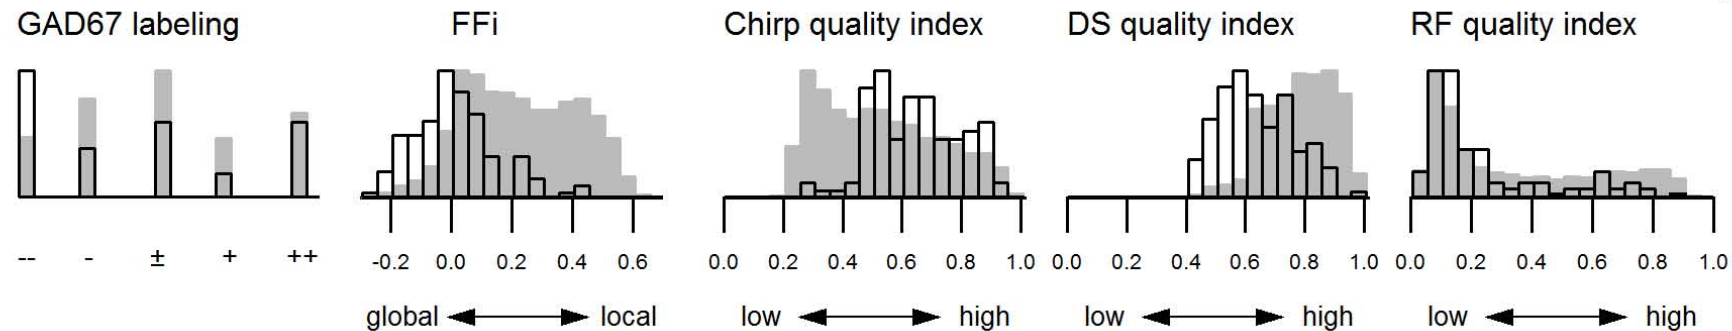

**d**

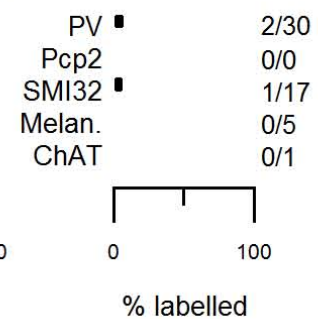

**Group 22 ON sust. (a)**

n = 98 Cells, 1.23%, (1.95% of RGCs); CF: 2.09

SFig. 3-32 a

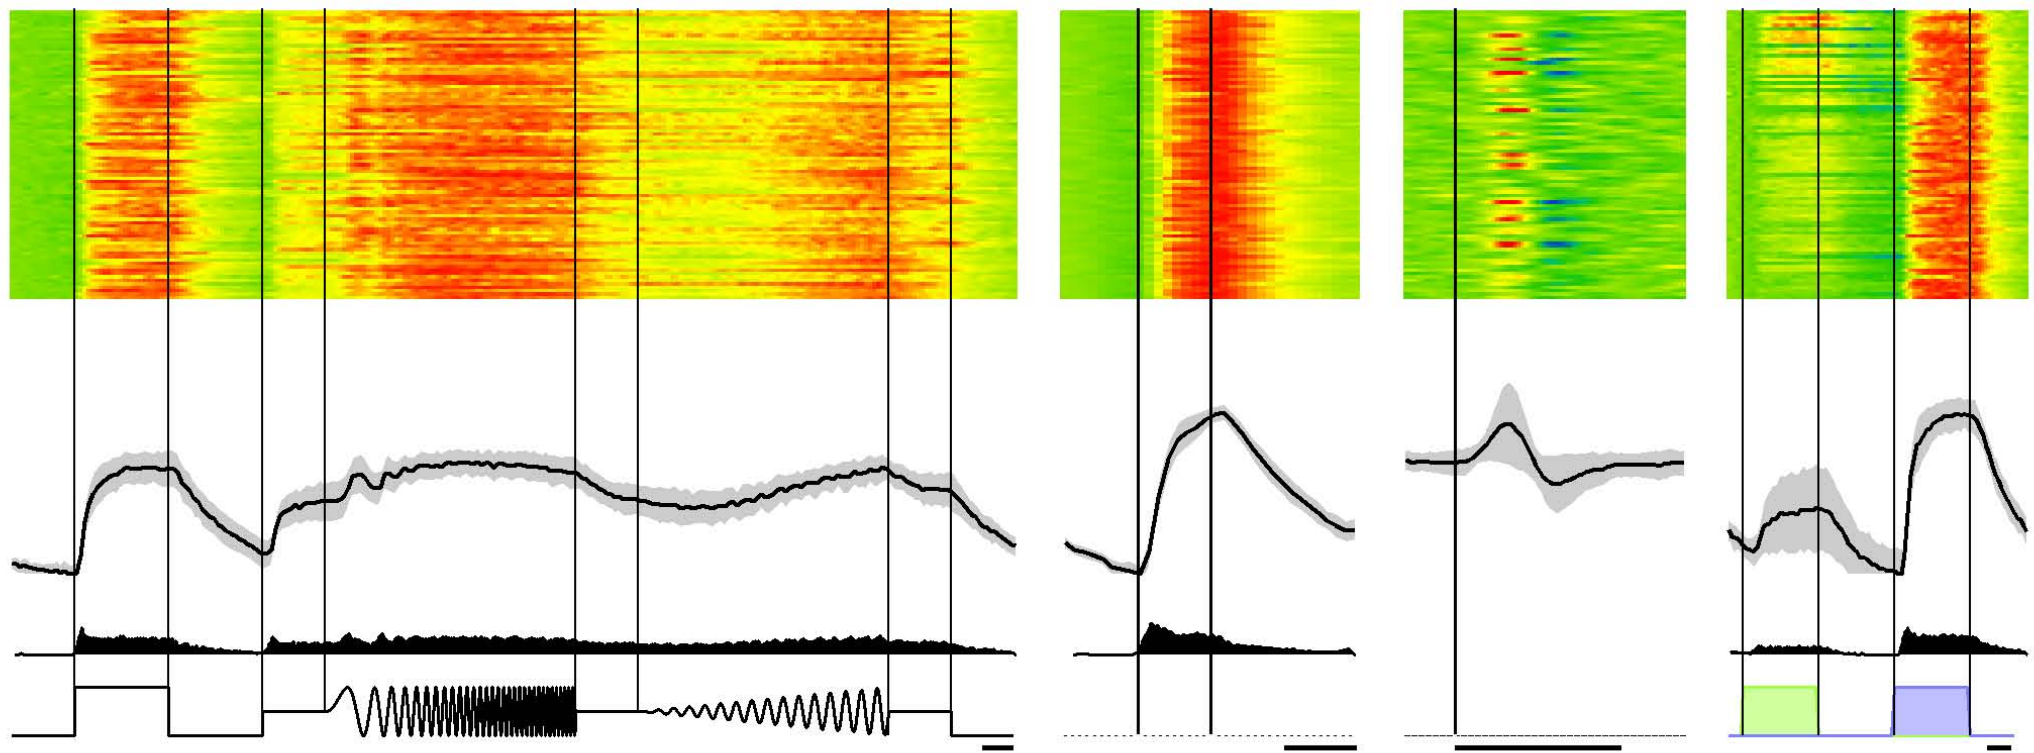

**b**

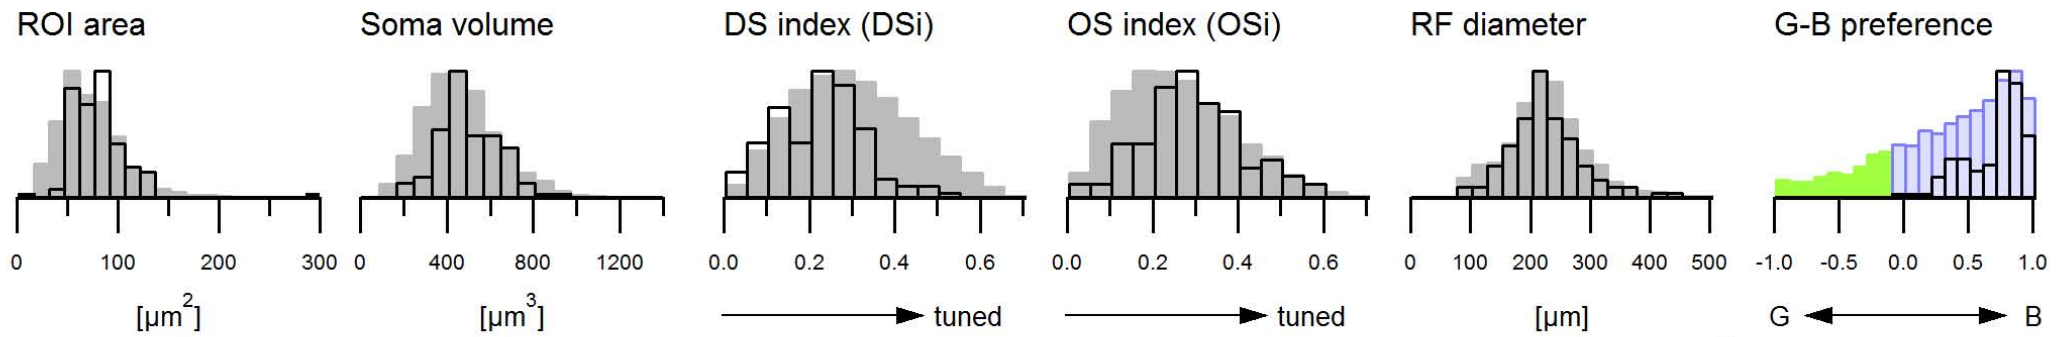

**c**

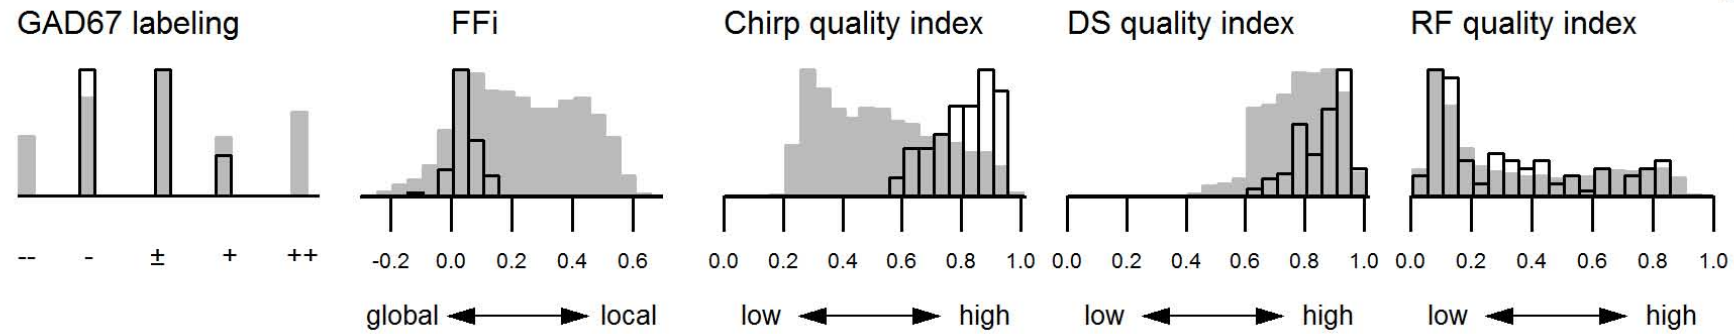

**d**

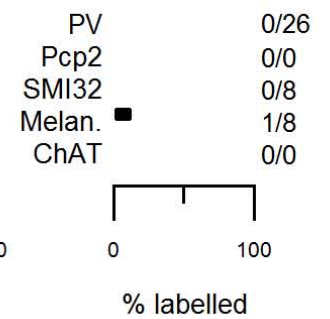

**Group 22 ON sust. (b)**

n = 85 Cells, 1.06%, (1.69% of RGCs); CF: 1.48



SFig. 3-33 a

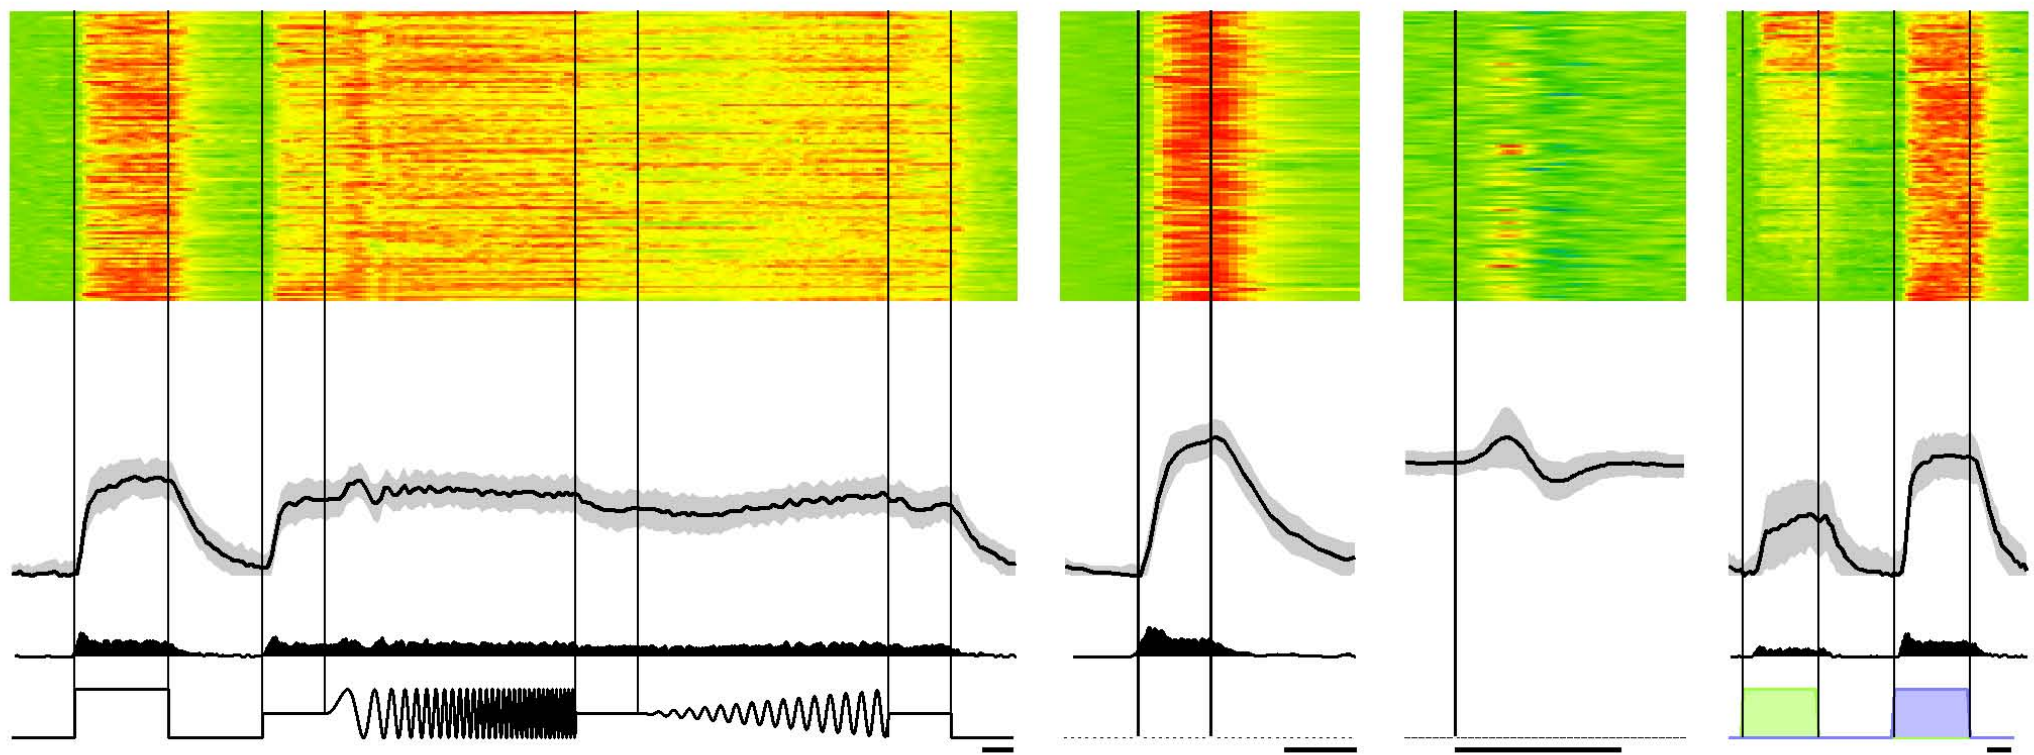

**b**

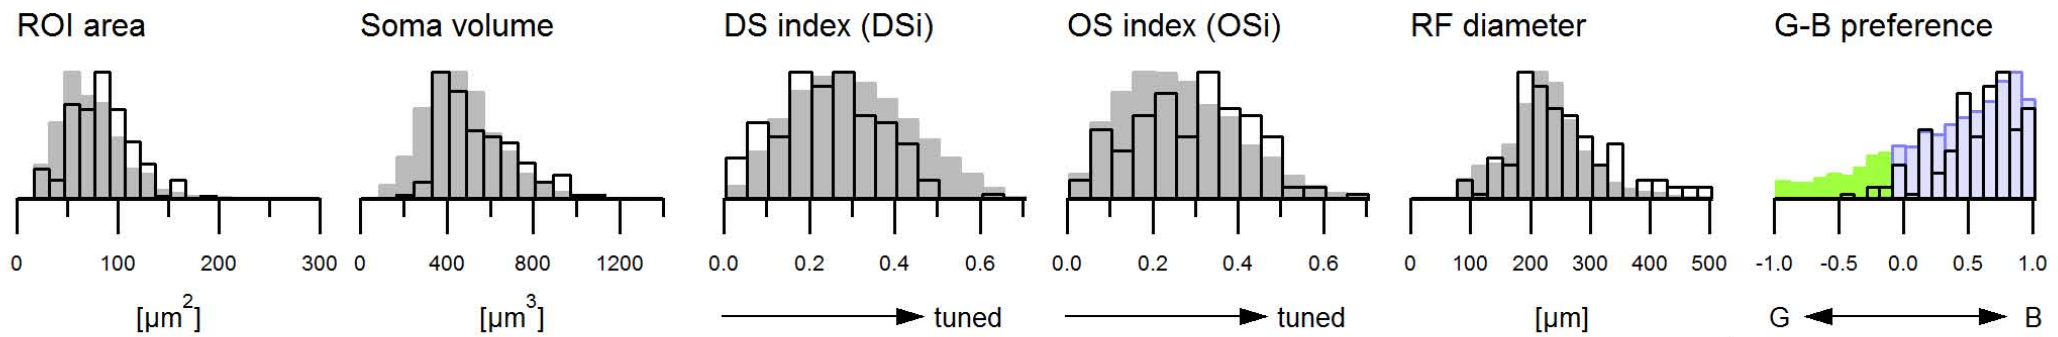

**c**

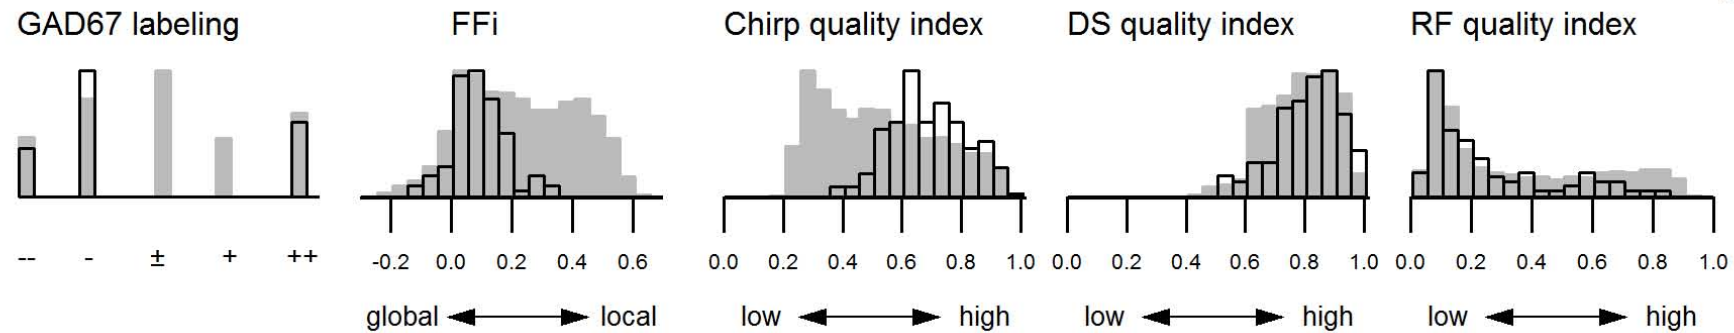

**d**

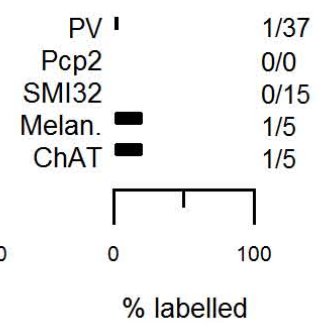

**Group 23** ON "mini" alpha

n = 113 Cells, 1.42%, (2.25% of RGCs); CF: 2.82

SFig. 3-34 a

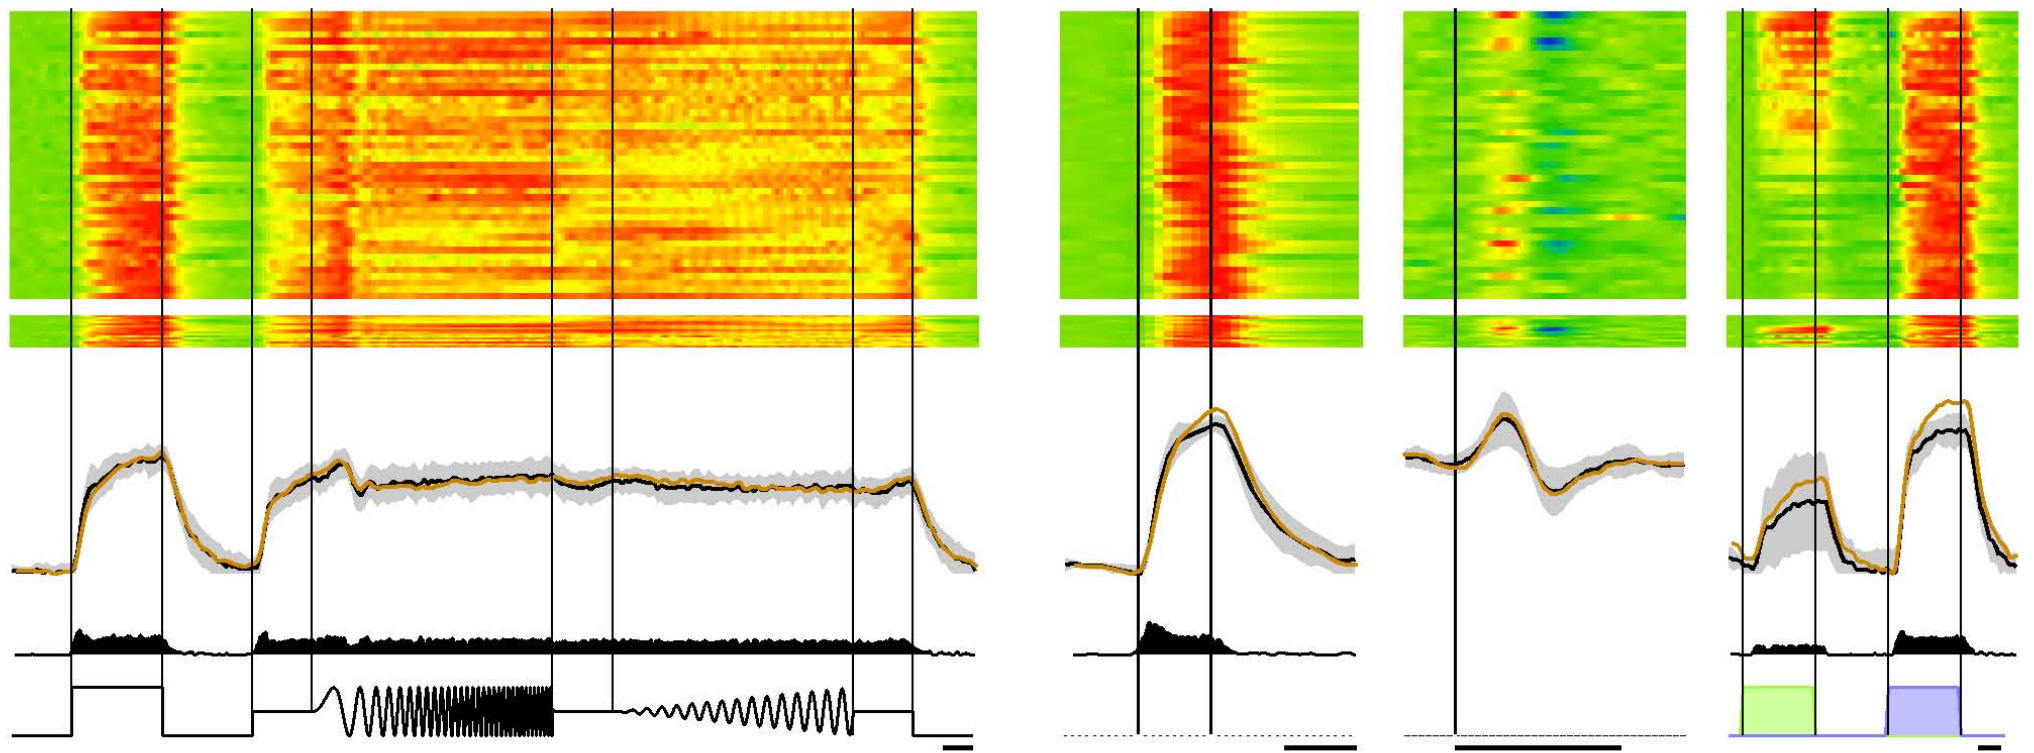

**b**

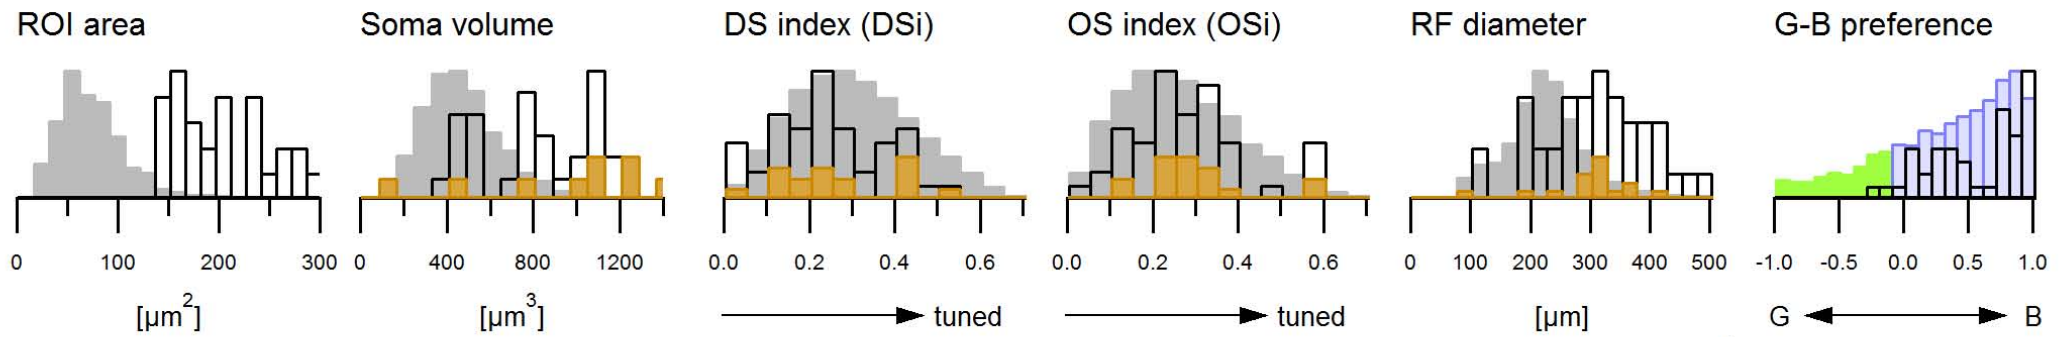

**c**

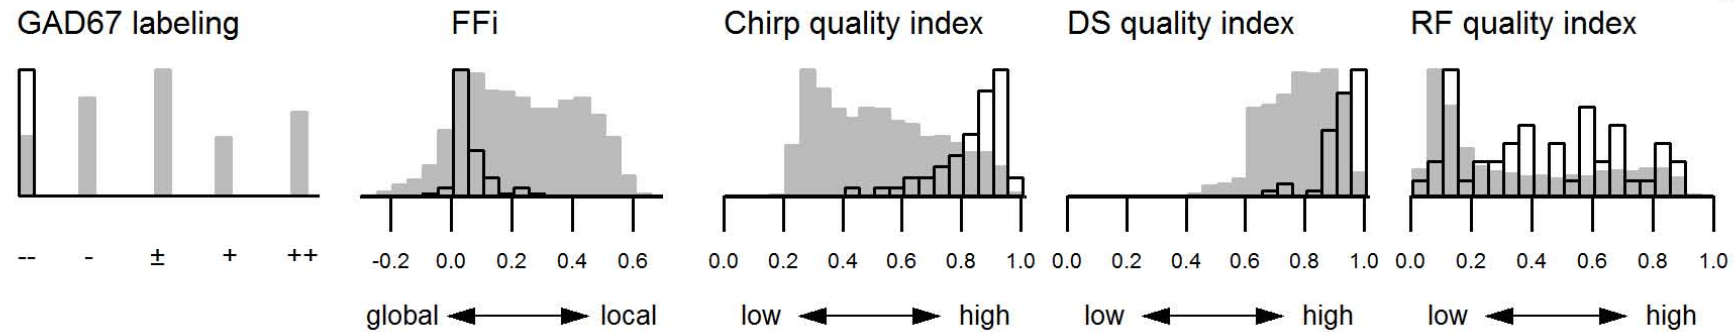

**d**

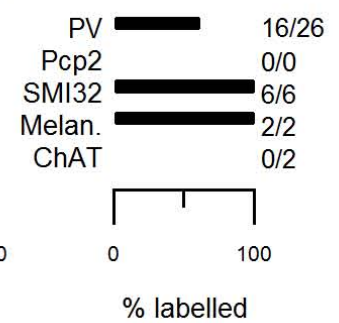

**Group 24 ON alpha**

n = 44 Cells, 0.55%, (0.88% of RGCs); CF: 1.63



SFig. 3-35 a

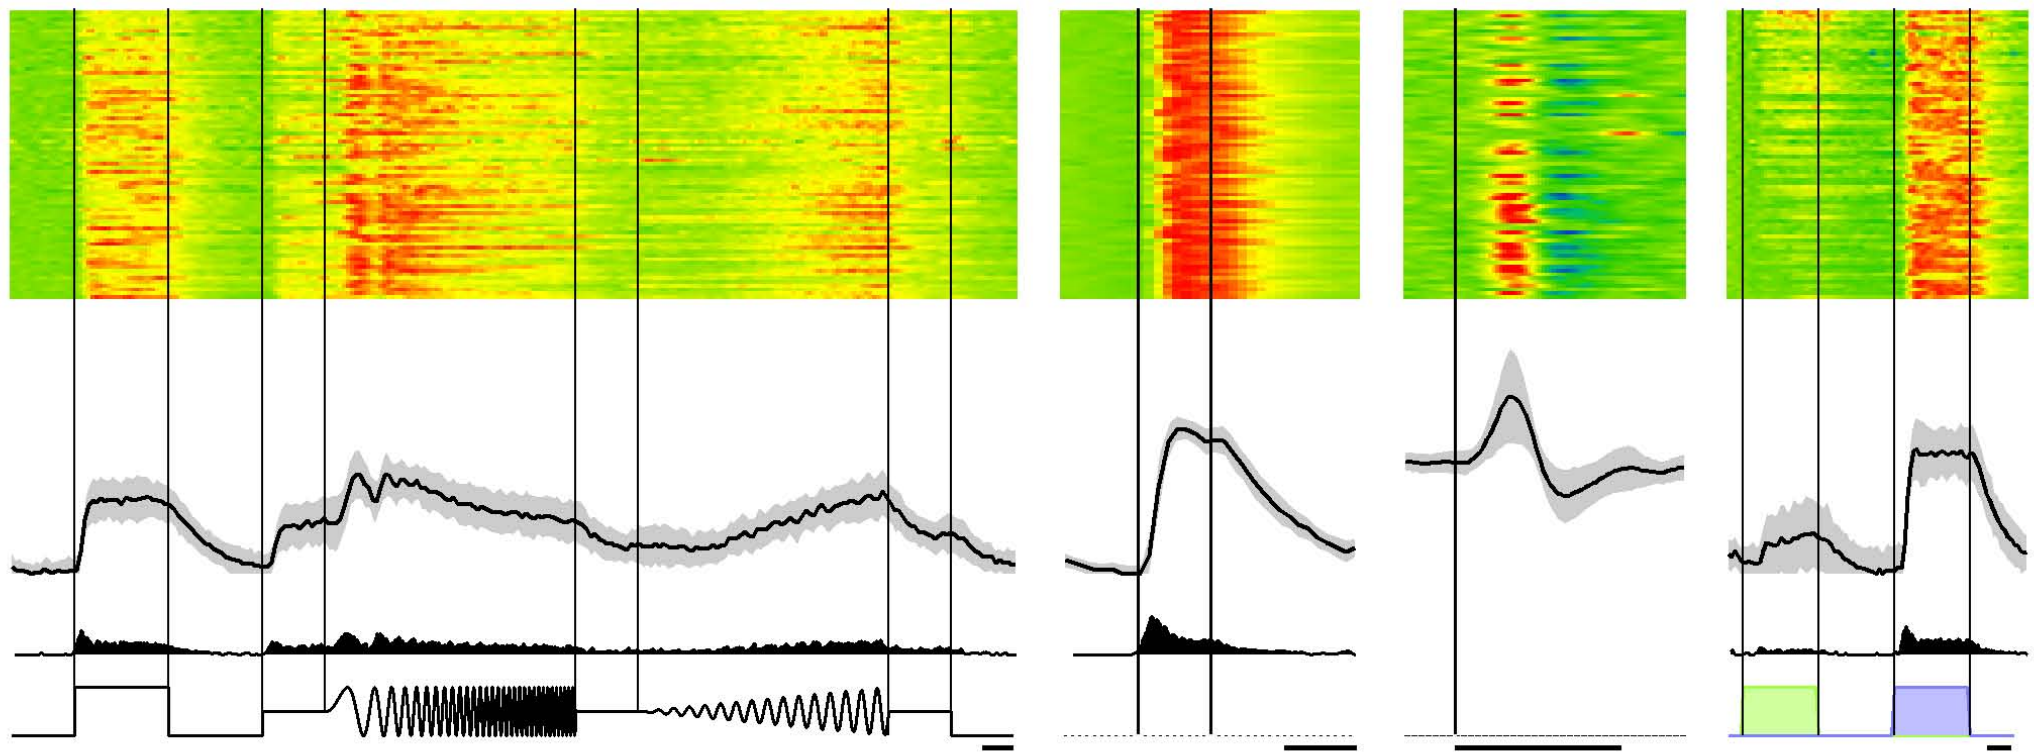

**b**

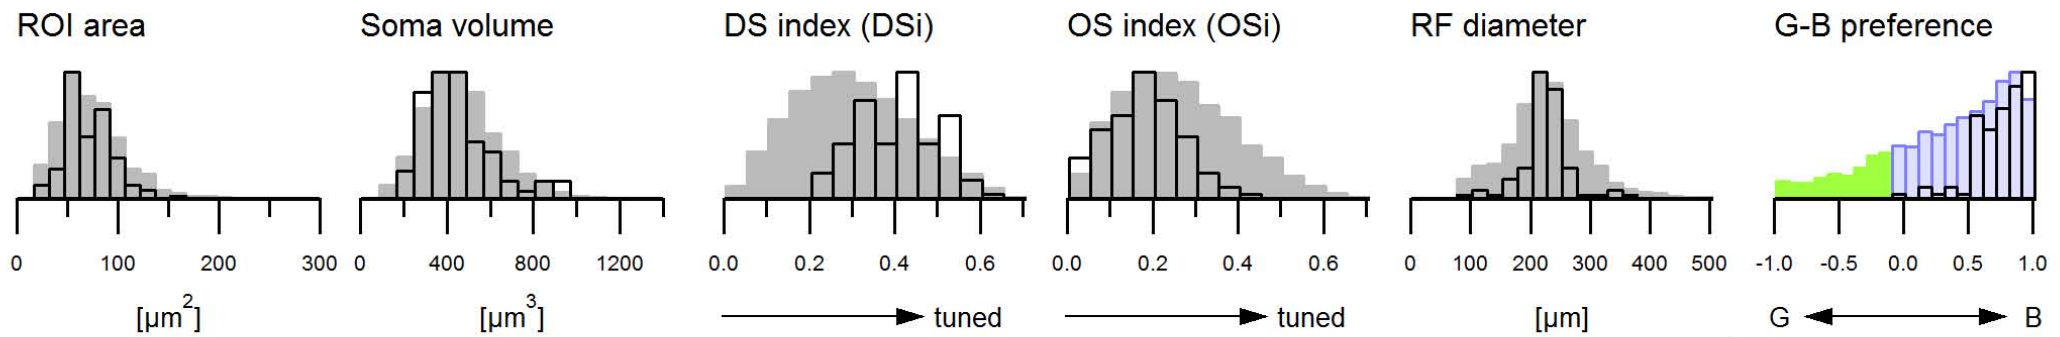

**c**

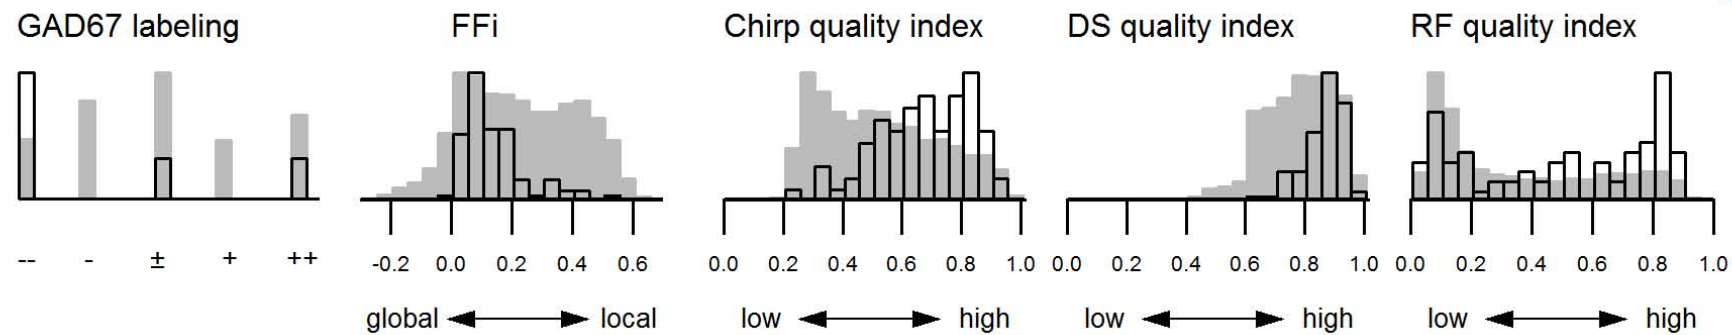

**d**

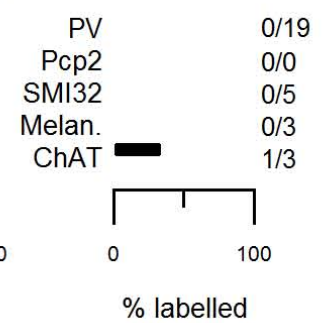

**Group 25 ON DS sust. 1**

n = 76 Cells, 0.95%, (1.51% of RGCs); CF: 1.17

SFig. 3-36 a

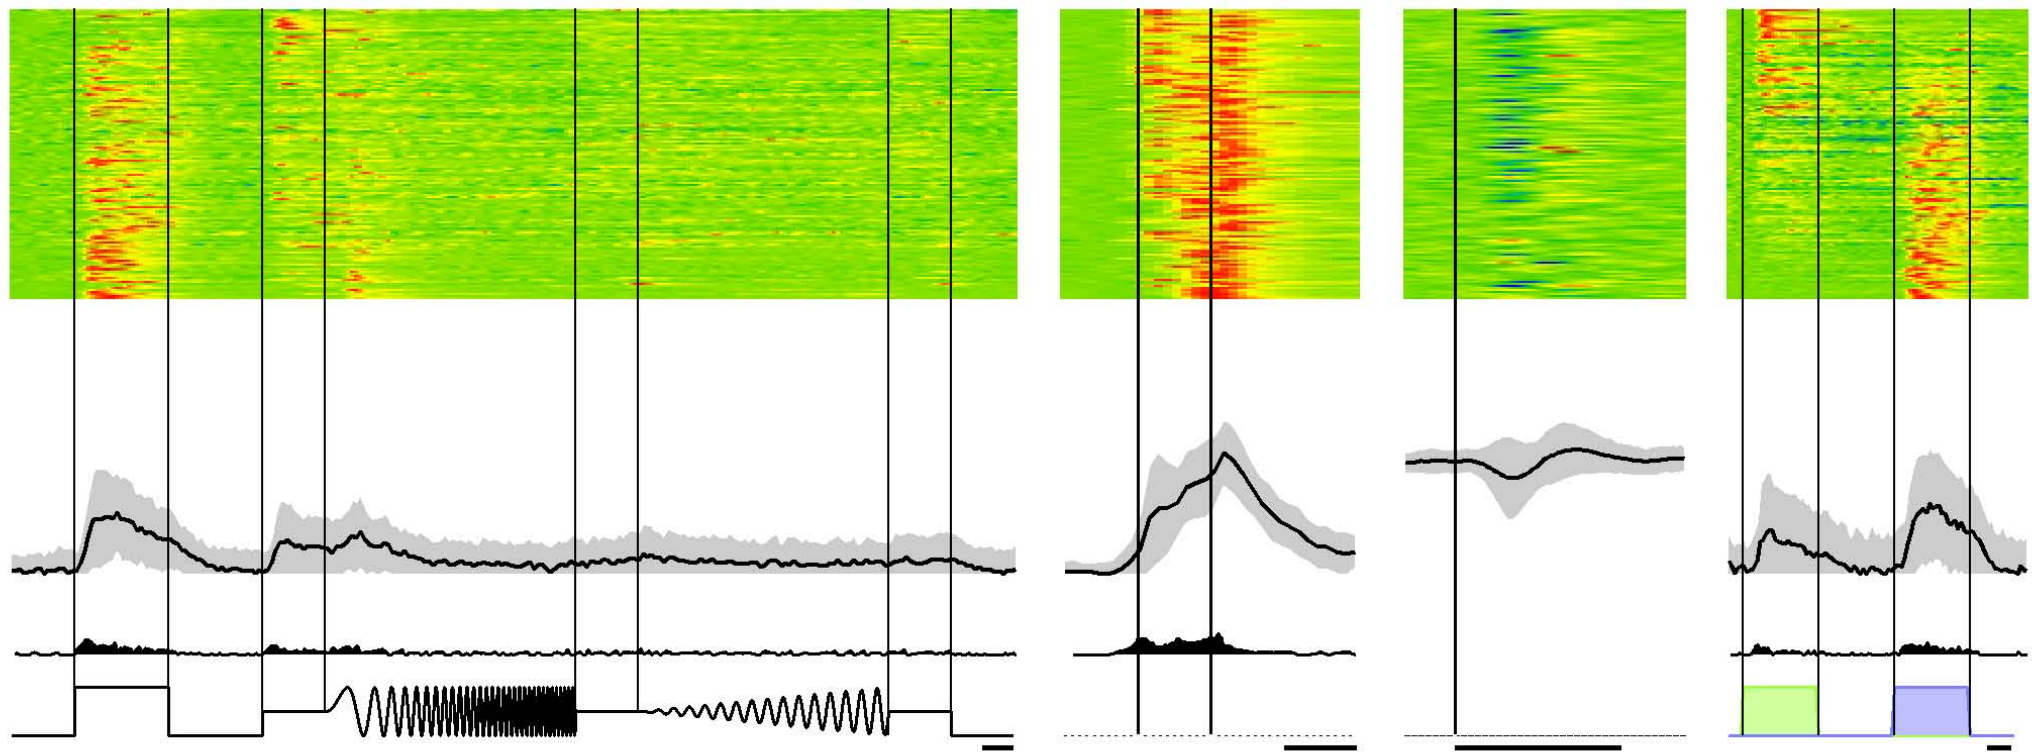

**b**

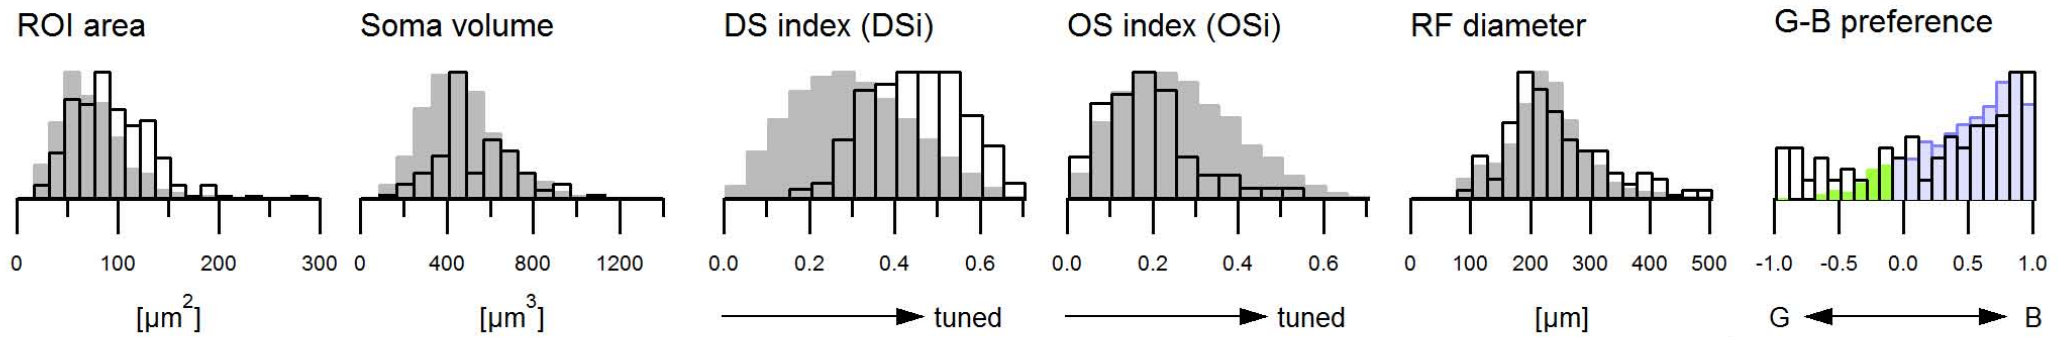

**c**

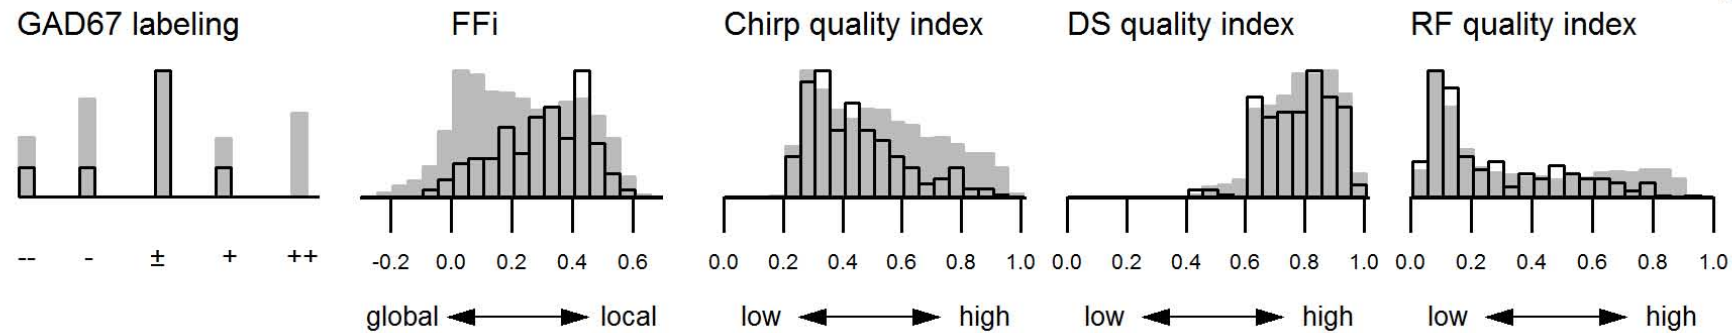

**d**

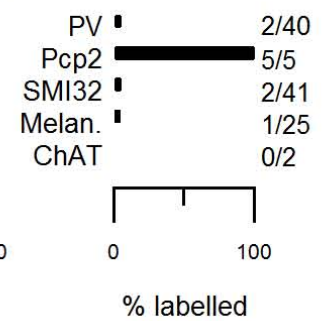

**Group 26 ON DS sust. 2**

n = 141 Cells, 1.77%, (2.81% of RGCs); CF: 2.44



SFig. 3-37 a

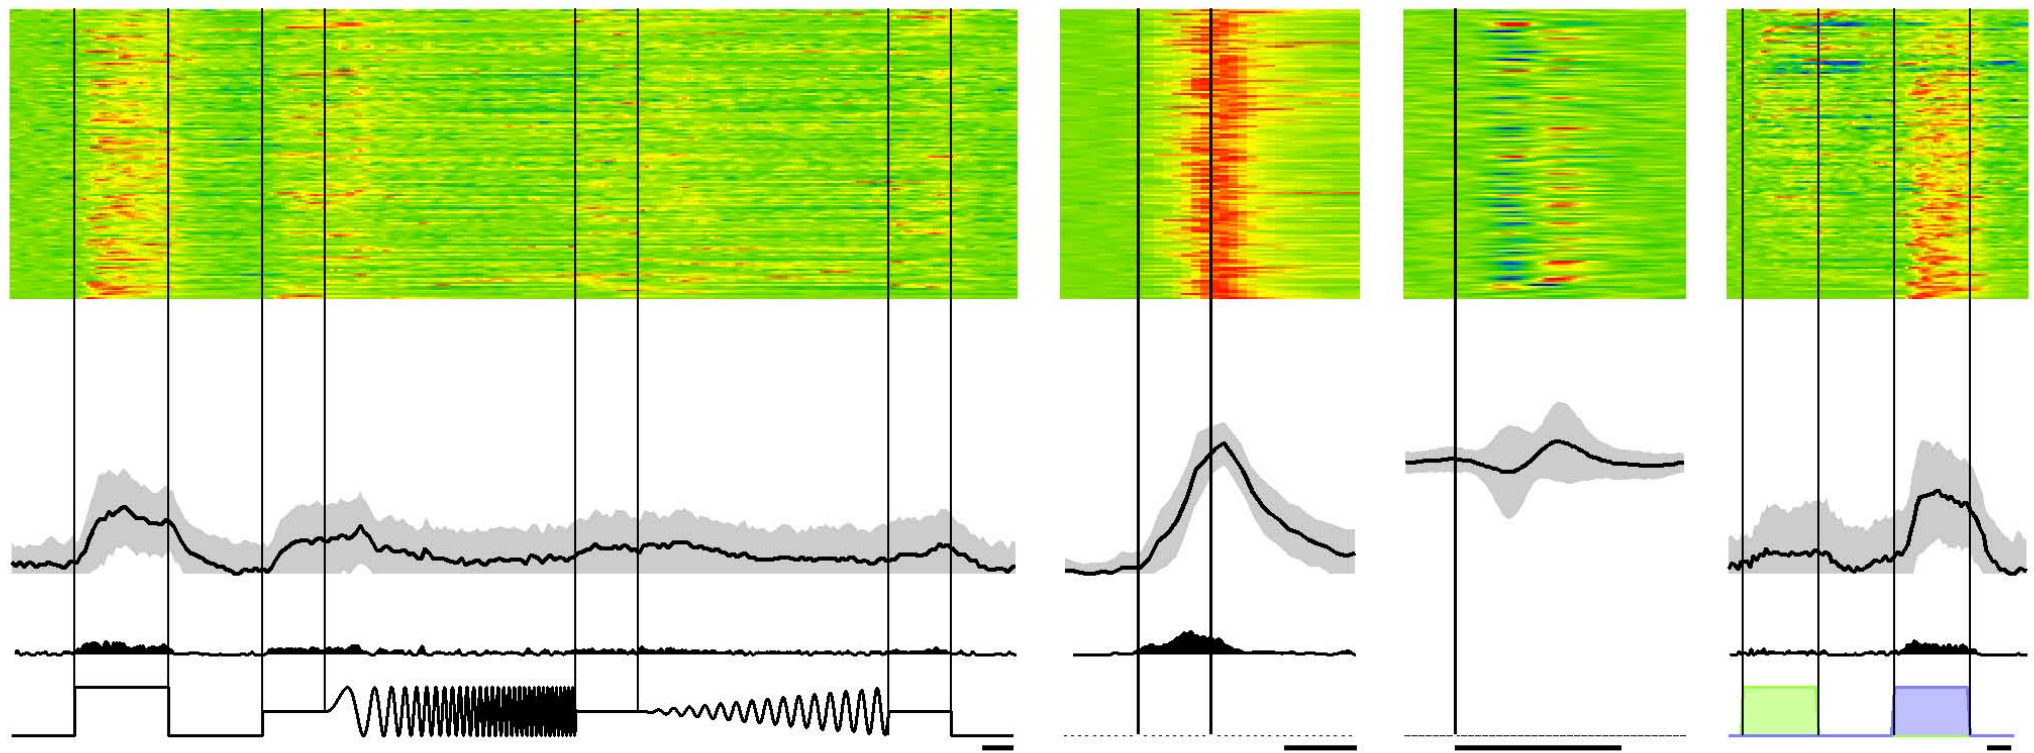

**b**

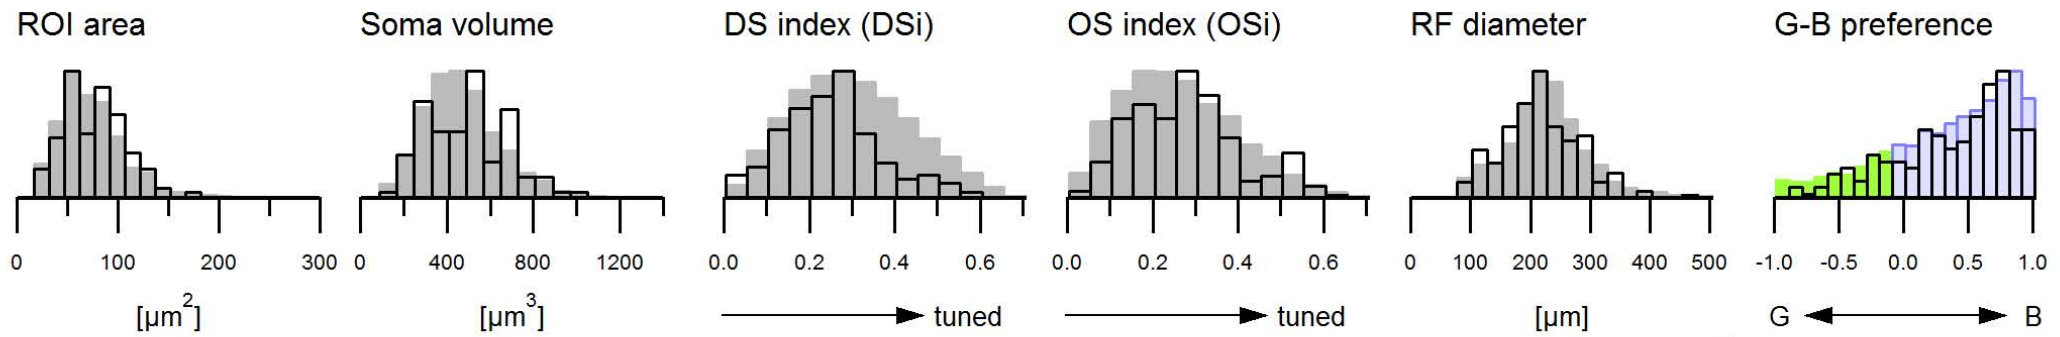

**c**

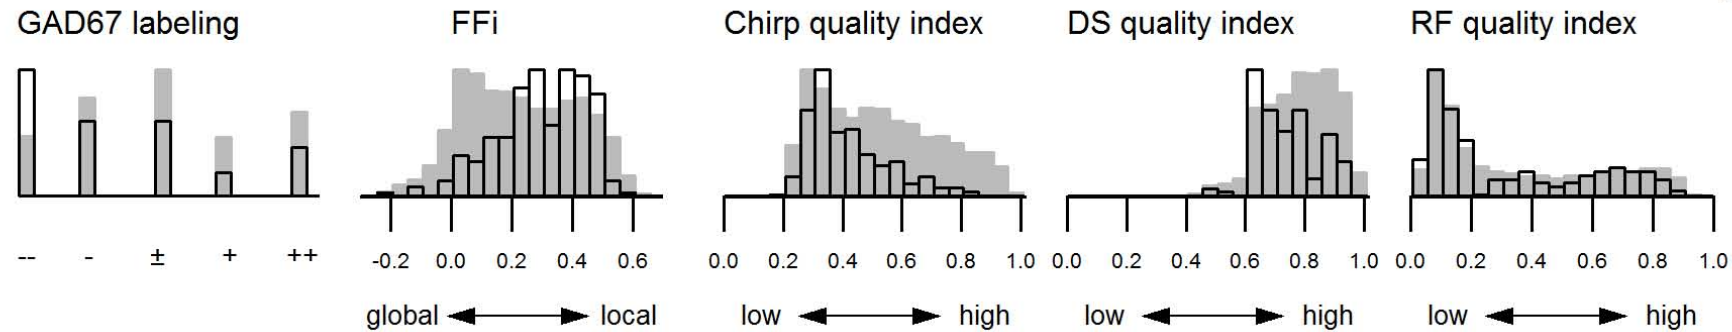

**d**

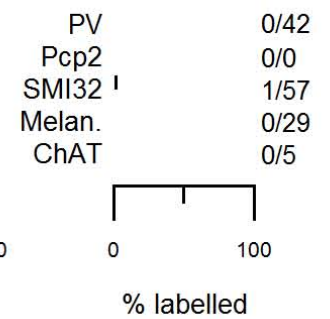

**Group 27 ON slow**

n = 152 Cells, 1.9%, (3.03% of RGCs); CF: 2.4

SFig. 3-38 a

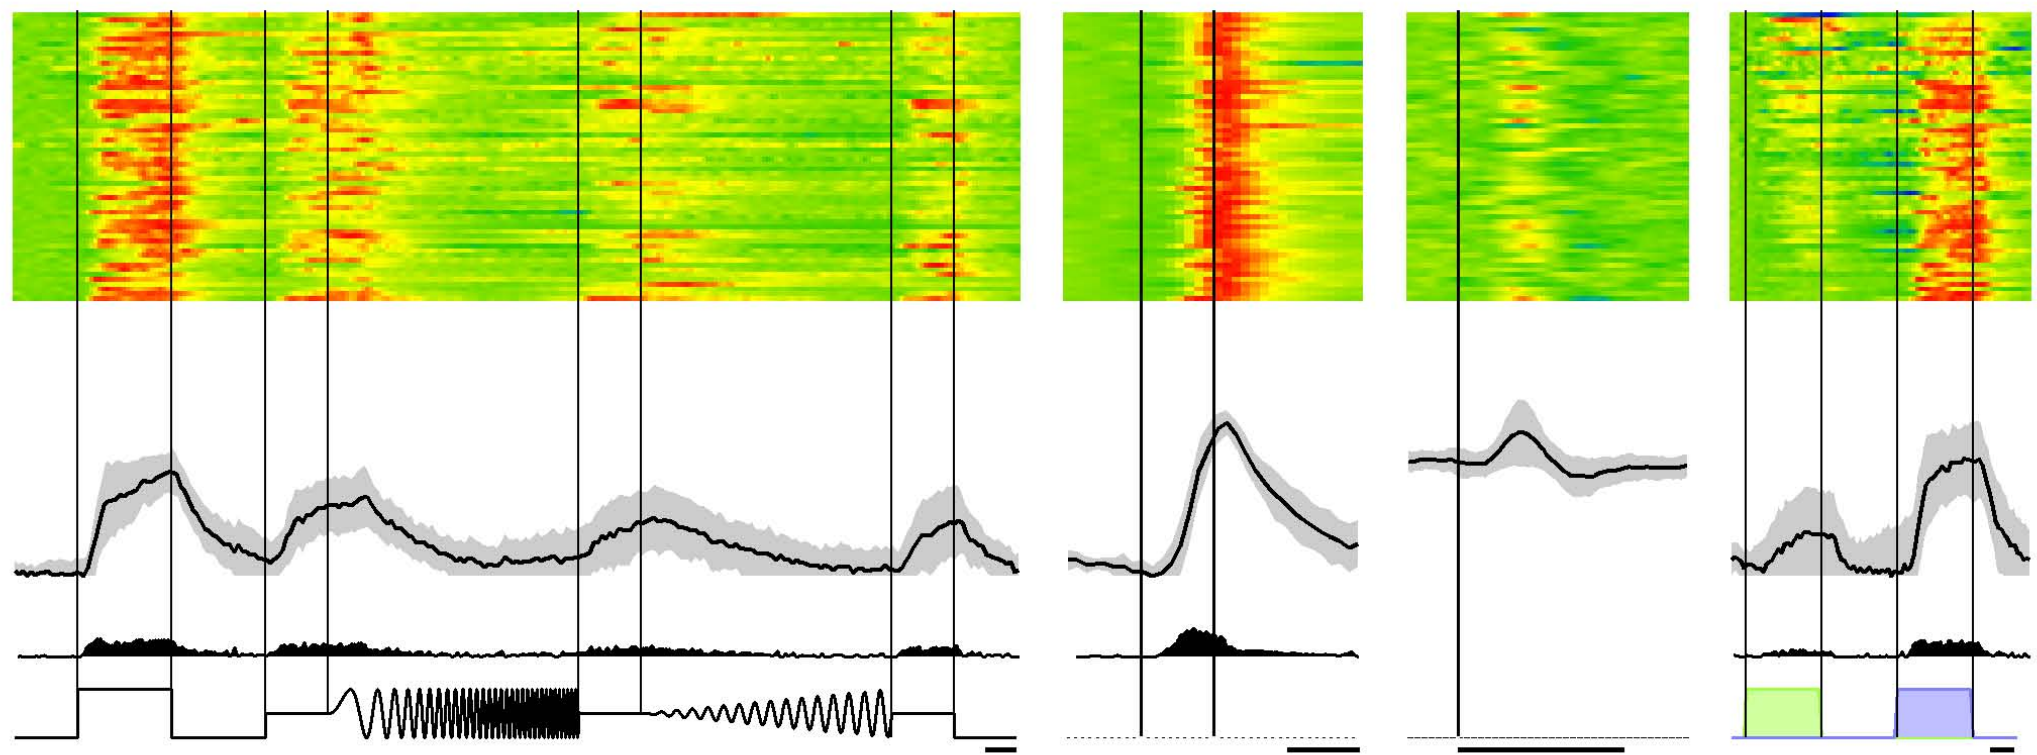

**b**

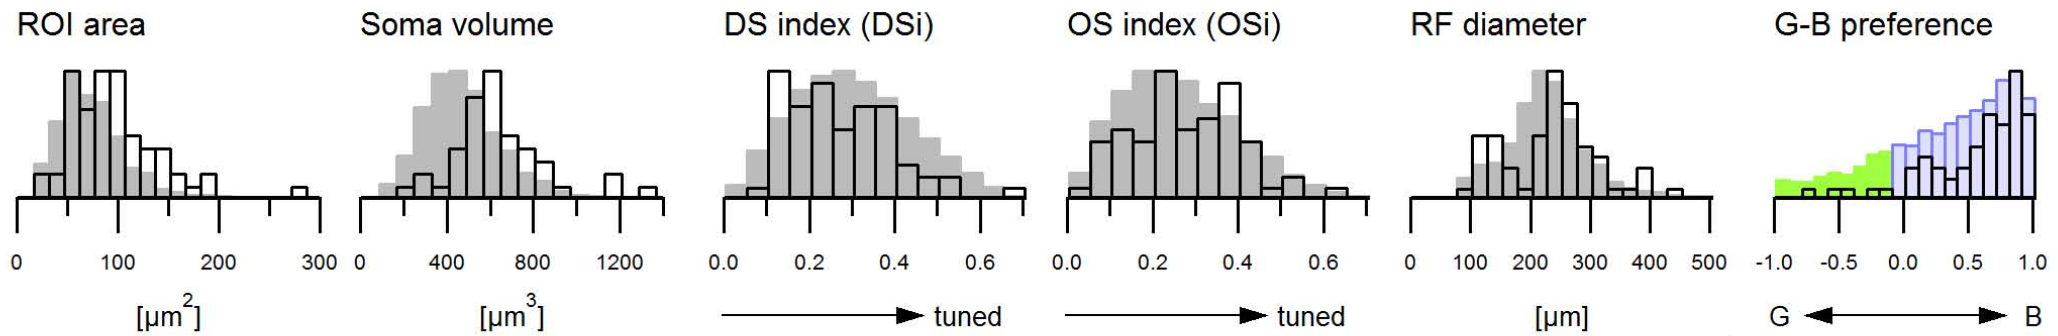

**c**

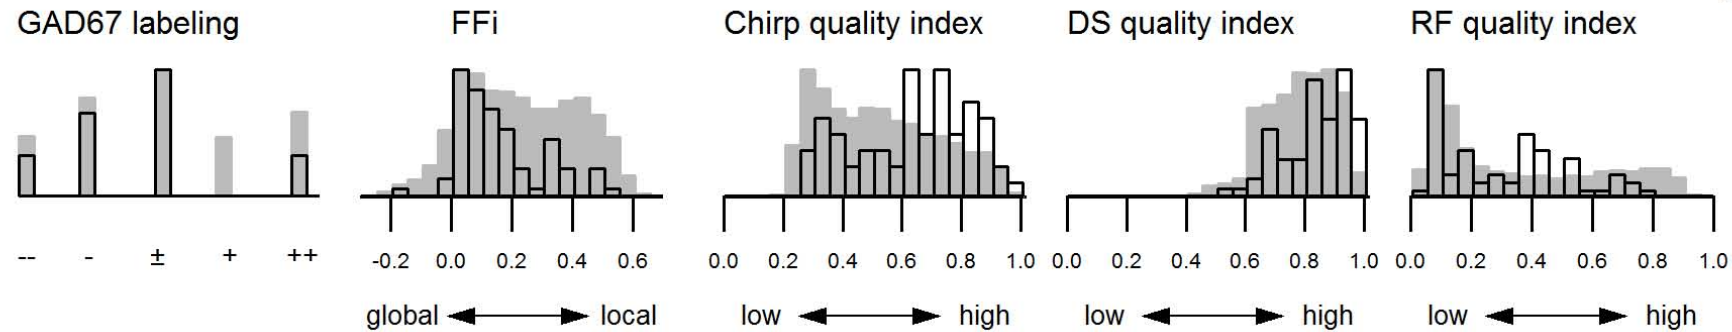

**d**

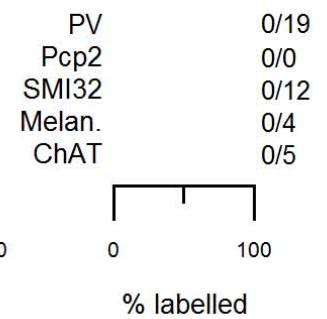

**Group 28** ON contrast suppr. (a)

n = 60 Cells, 0.75%, (1.19% of RGCs); CF: 1.35



SFig. 3-39 a

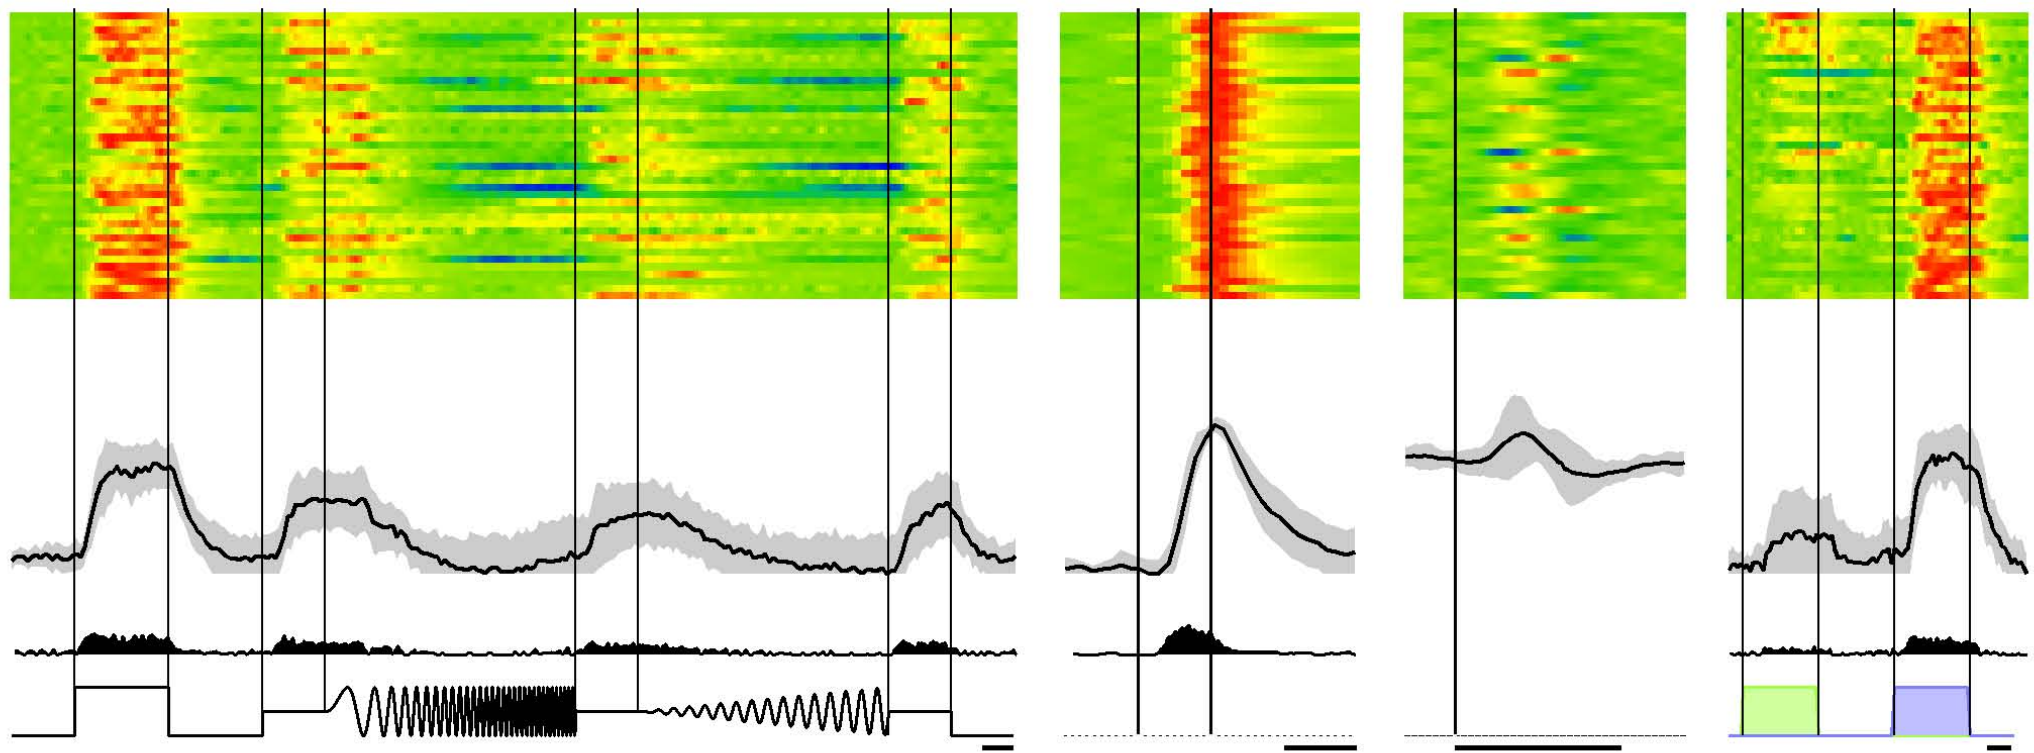

**b**

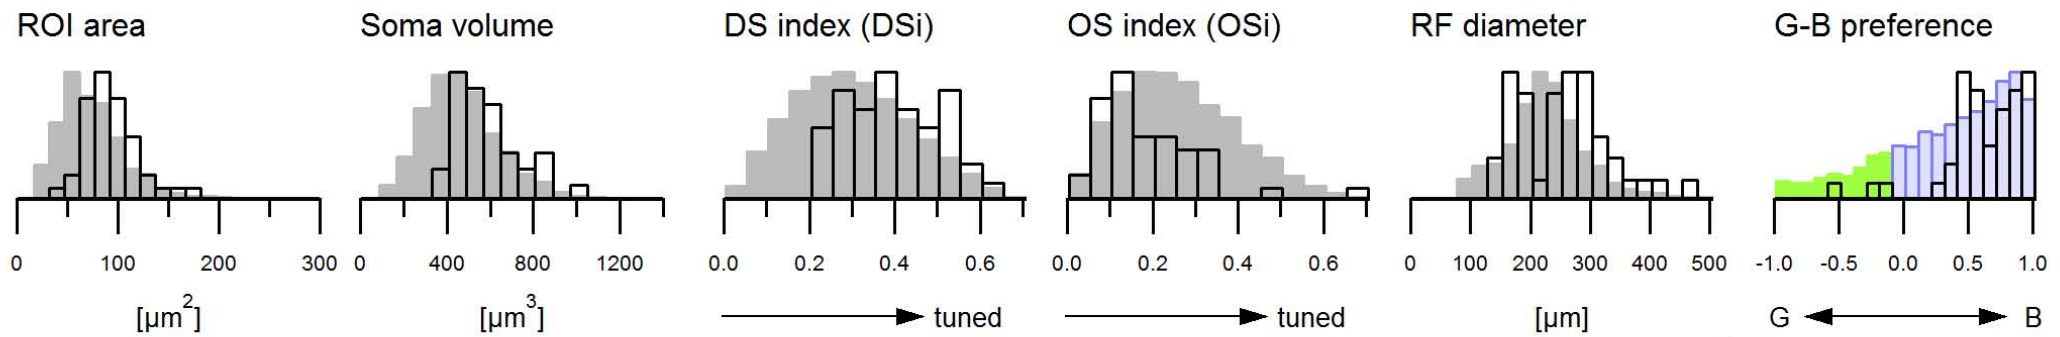

**c**

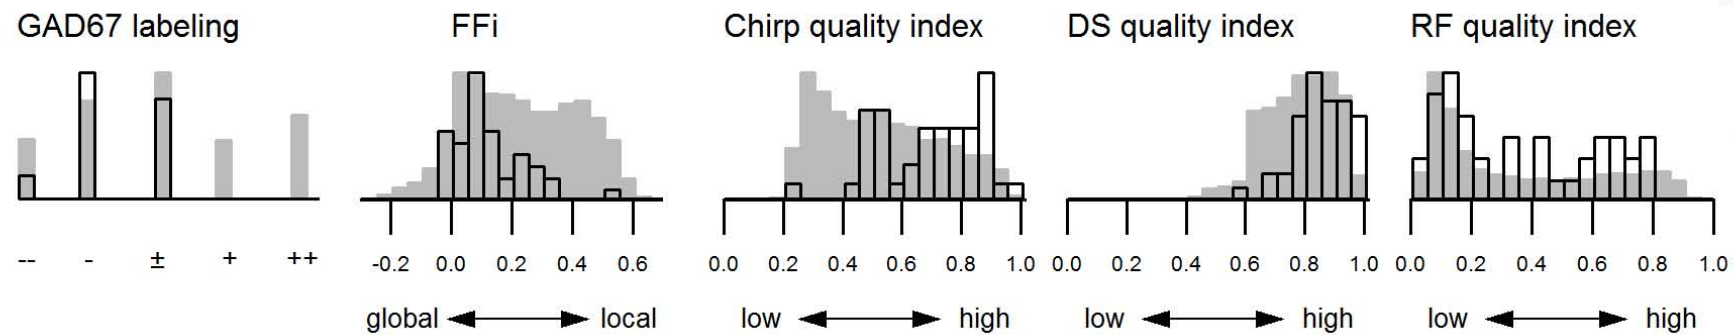

**d**

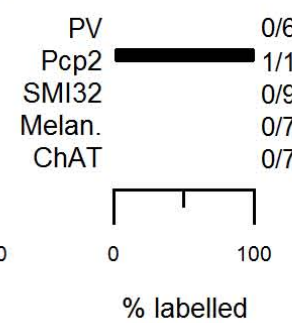

**Group 28** ON contrast suppr. (b)

n = 40 Cells, 0.5%, (0.8% of RGCs); CF: 0.92

SFig. 3-40 a

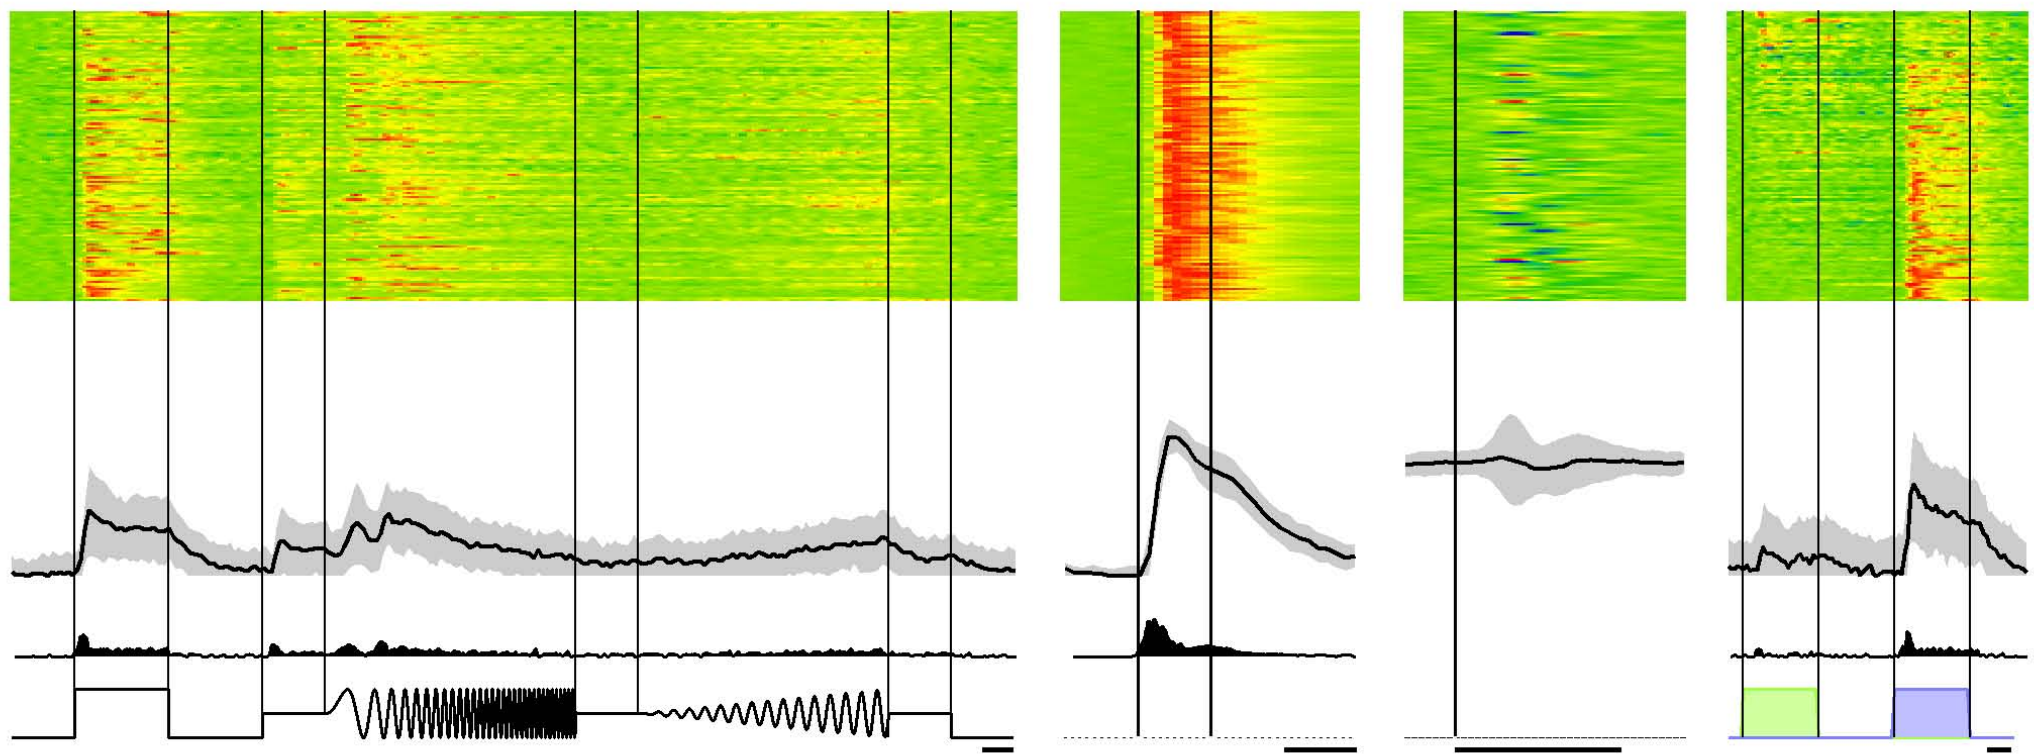

**b**

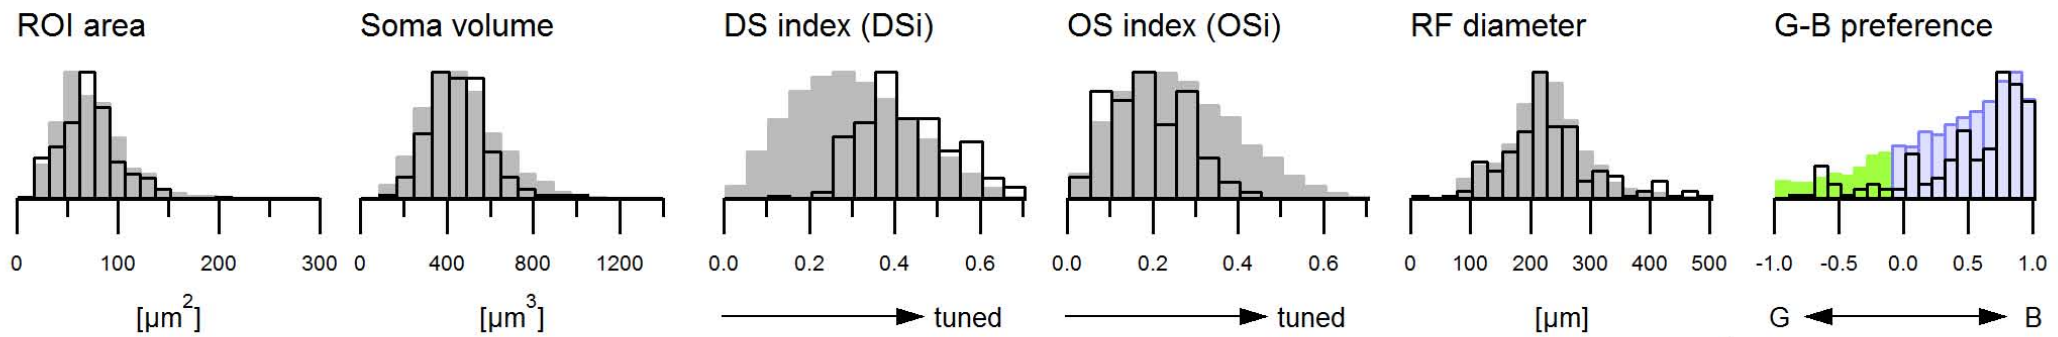

**c**

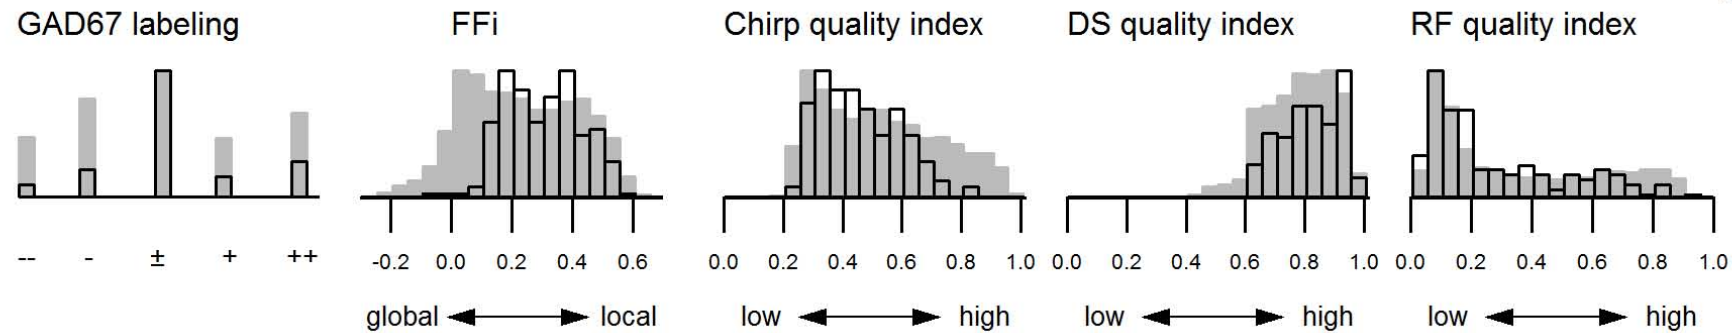

**d**

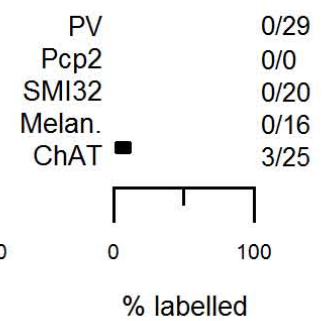

**Group 29 ON DS sust. 3**

n = 130 Cells, 1.63%, (2.59% of RGCs); CF: 2.34



SFig. 3-41 a

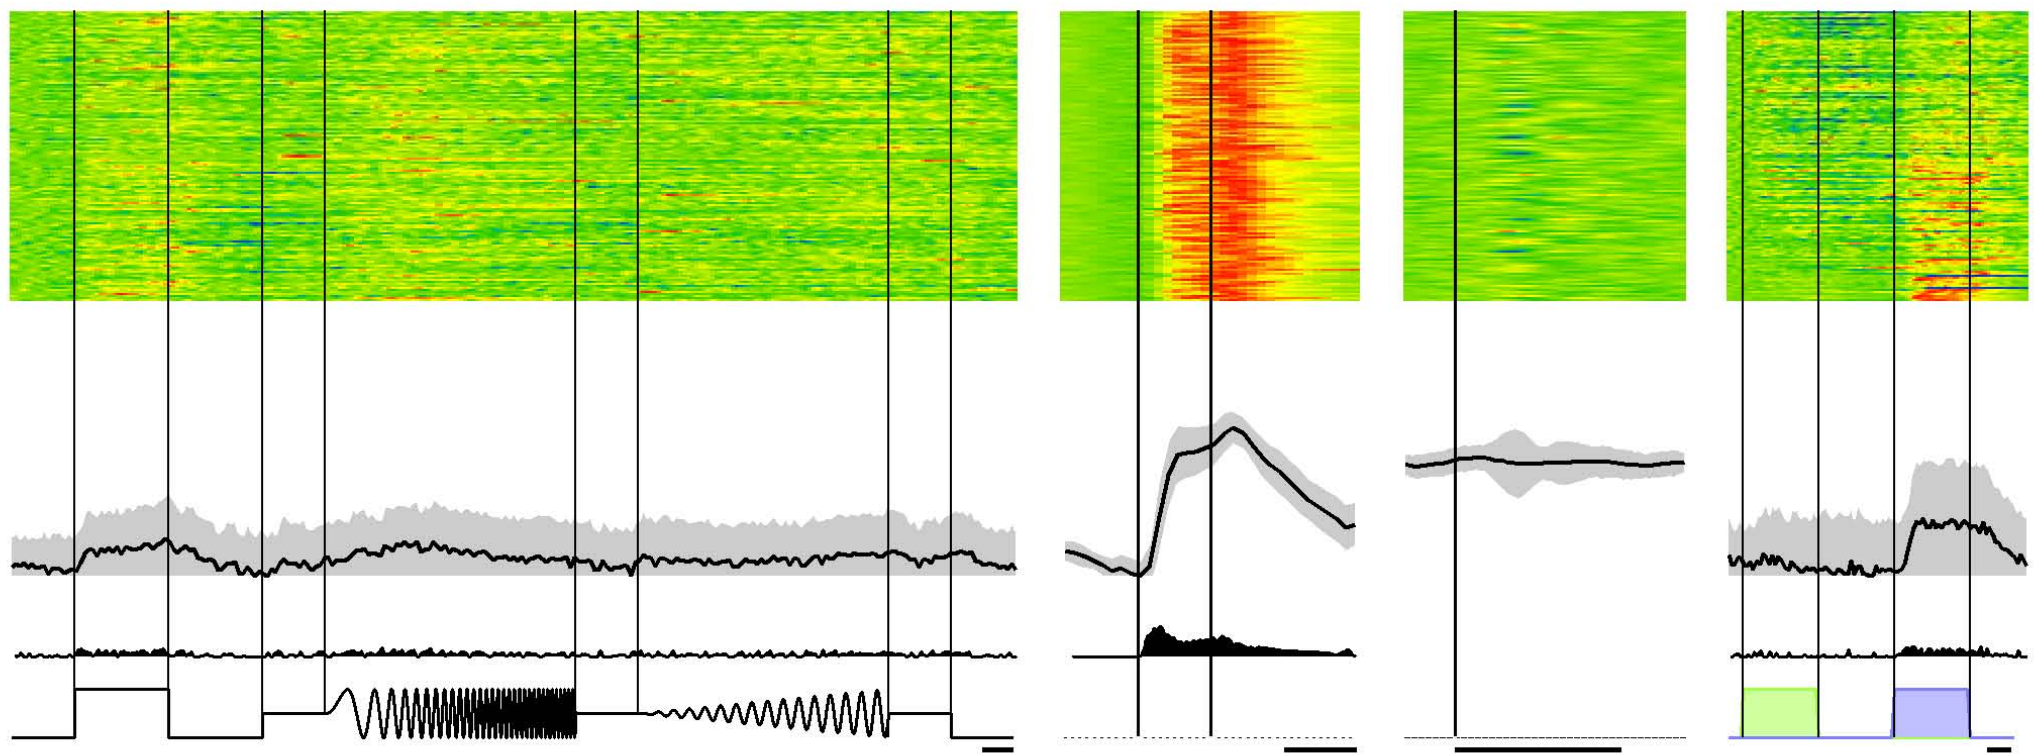

**b**

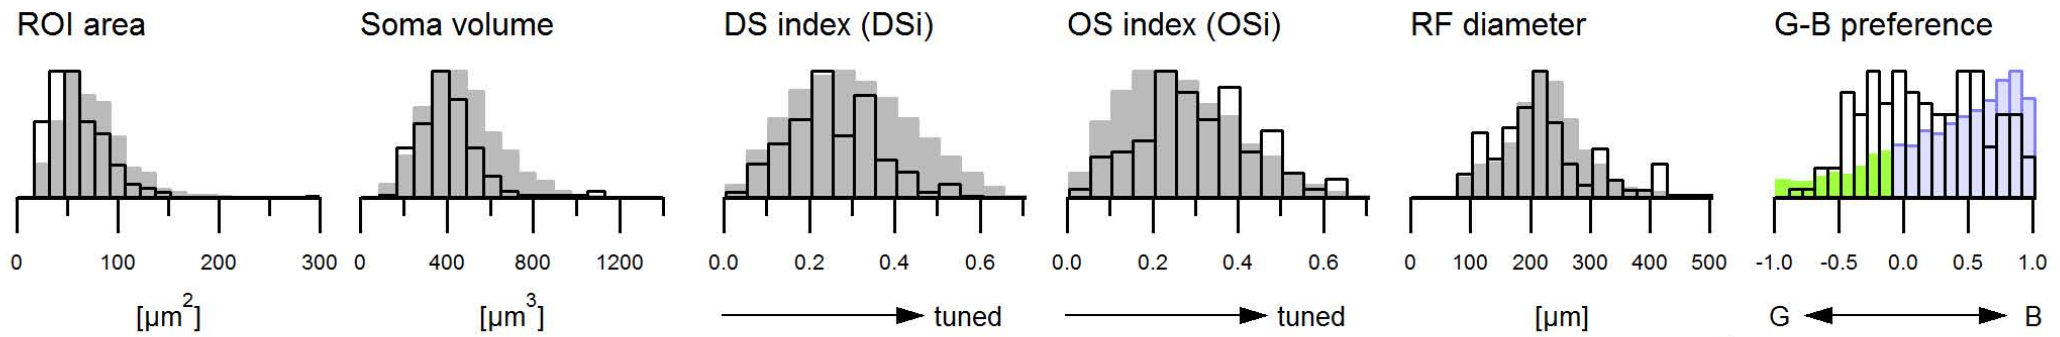

**c**

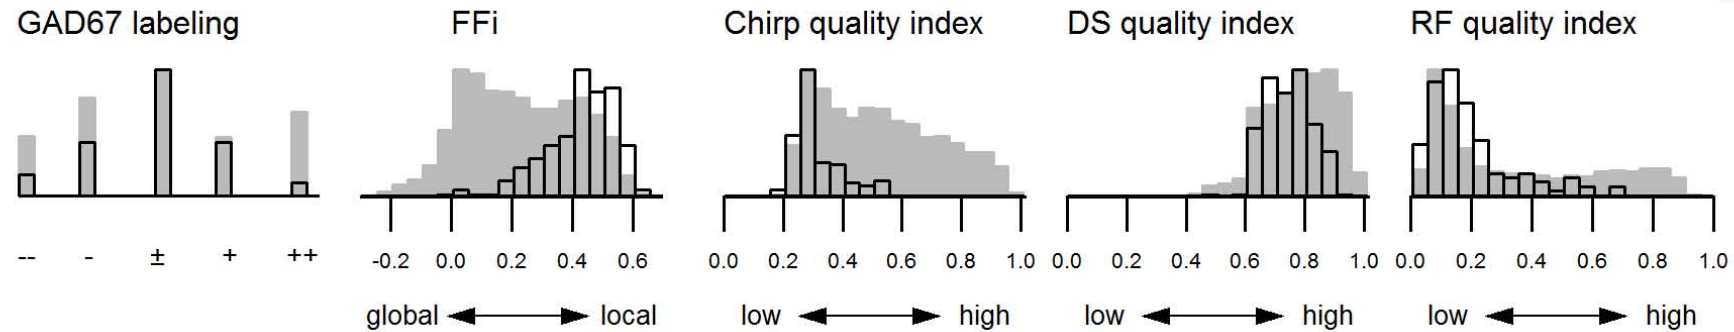

**d**

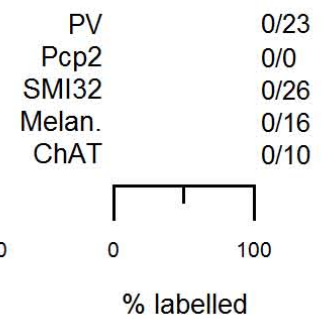

**Group 30** ON local sust., OS  
 n = 143 Cells, 1.79%, (2.85% of RGCs); CF: 2.43

SFig. 3-42 a

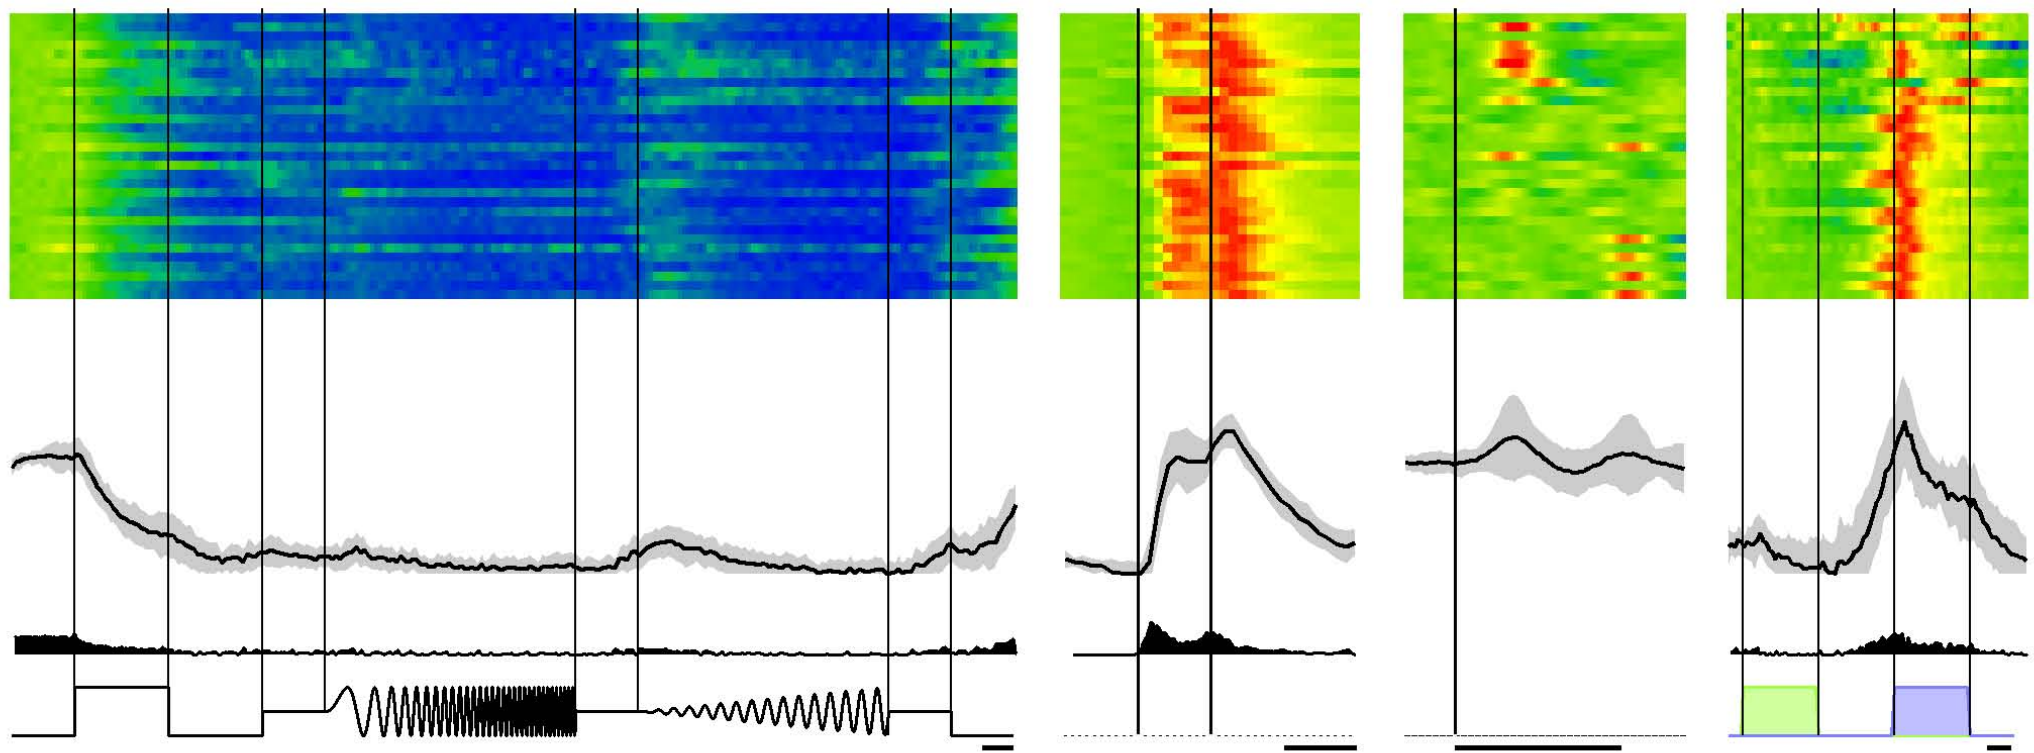

**b**

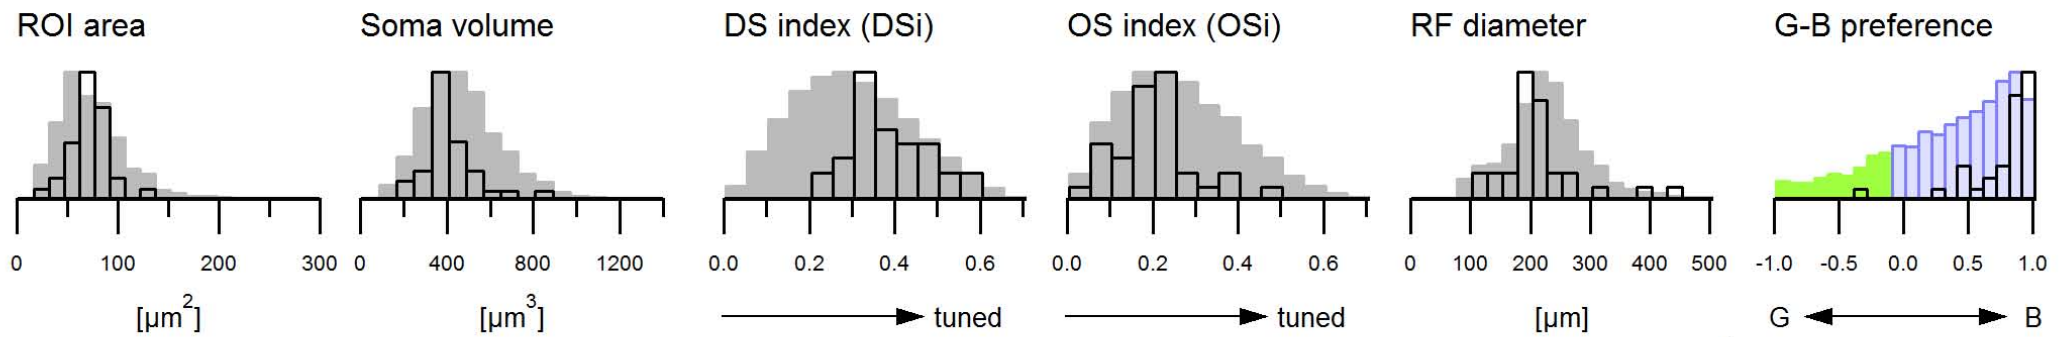

**c**

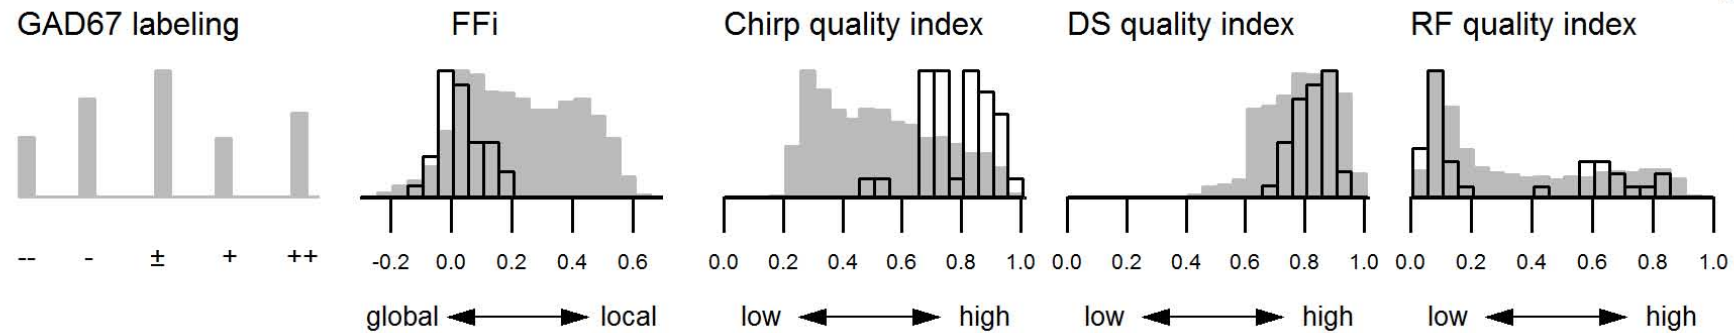

**d**

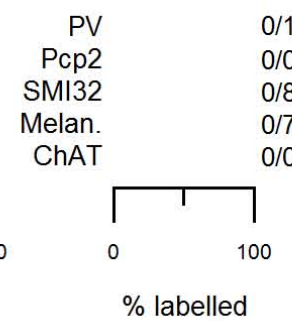

**Group 31** OFF suppr. 1 (a)

n = 31 Cells, 0.39%, (0.62% of RGCs); CF: 0.4



SFig. 3-43 a

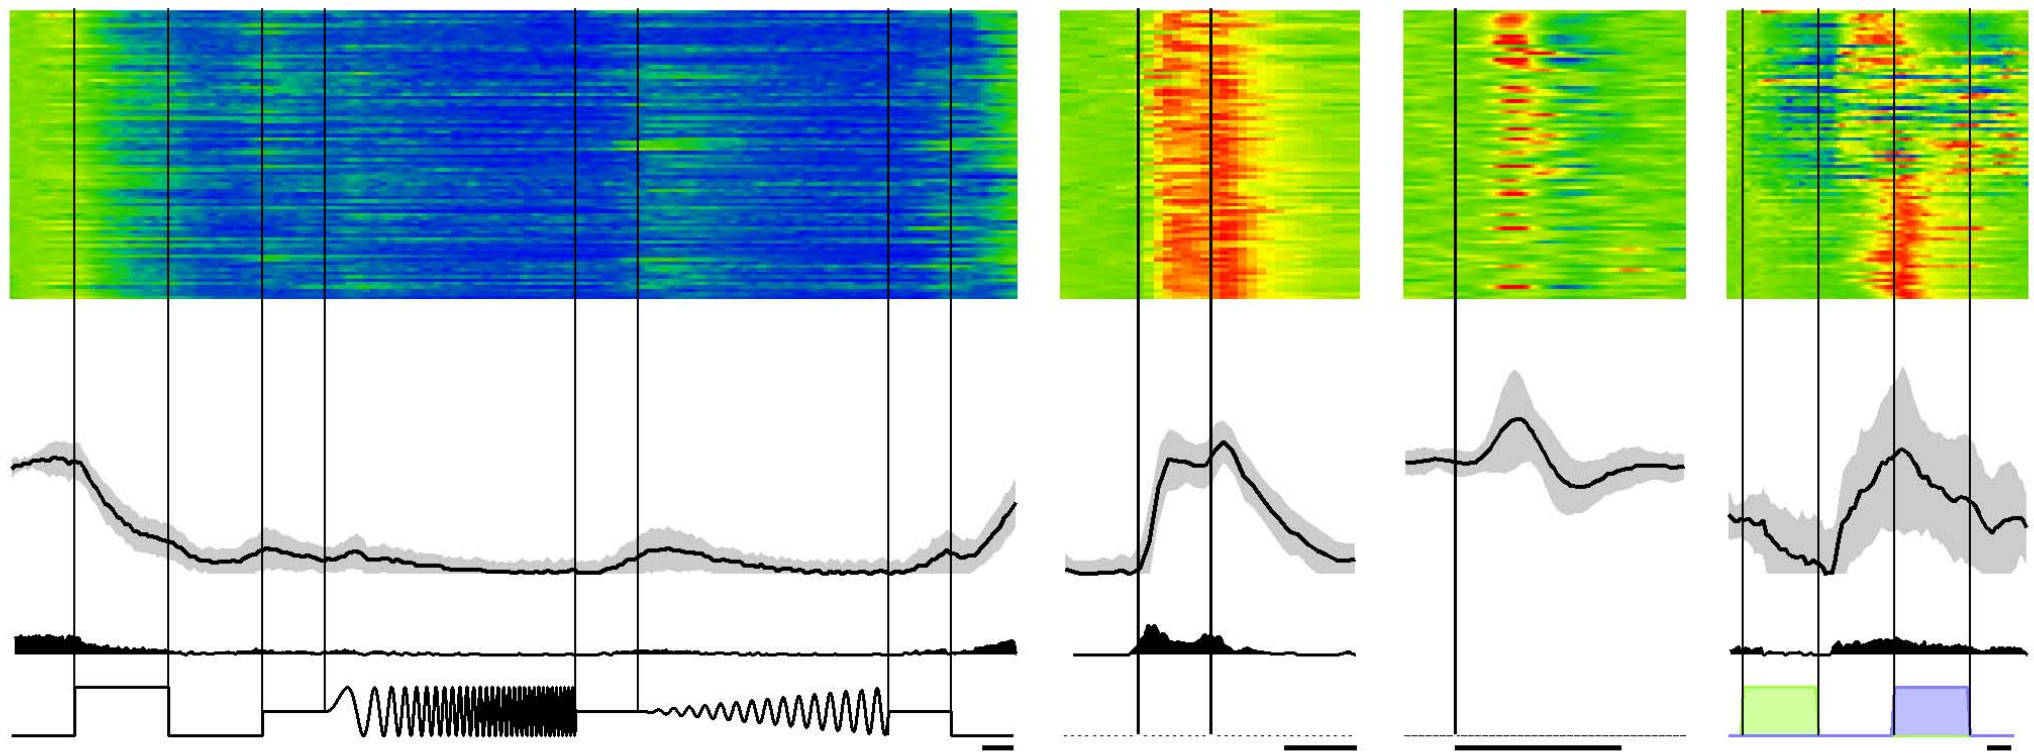

**b**

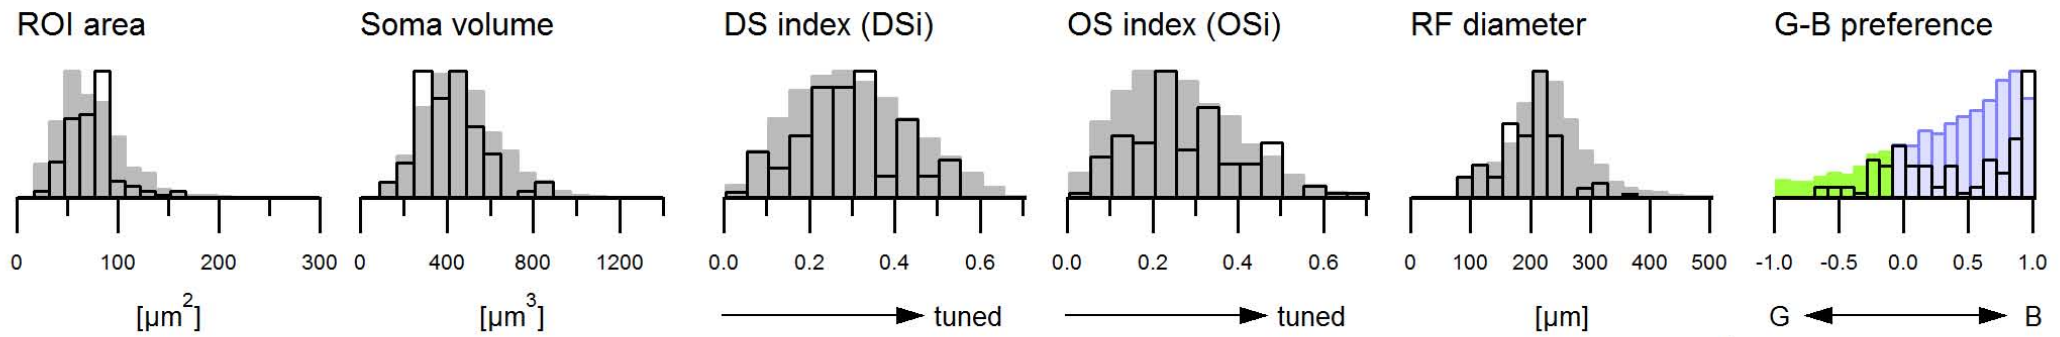

**c**

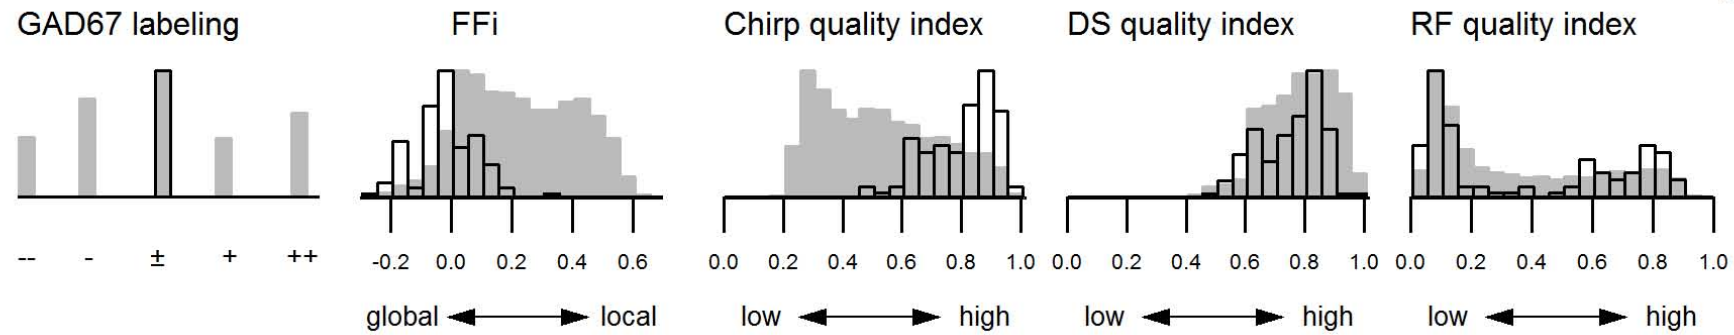

**d**

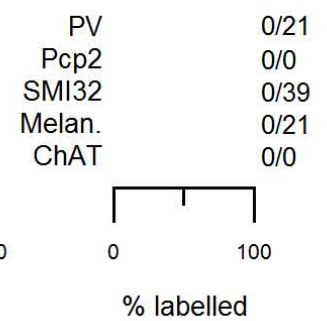

**Group 31 OFF suppr. 1 (b)**

n = 84 Cells, 1.05%, (1.67% of RGCs); CF: 1.18

SFig. 3-44 a

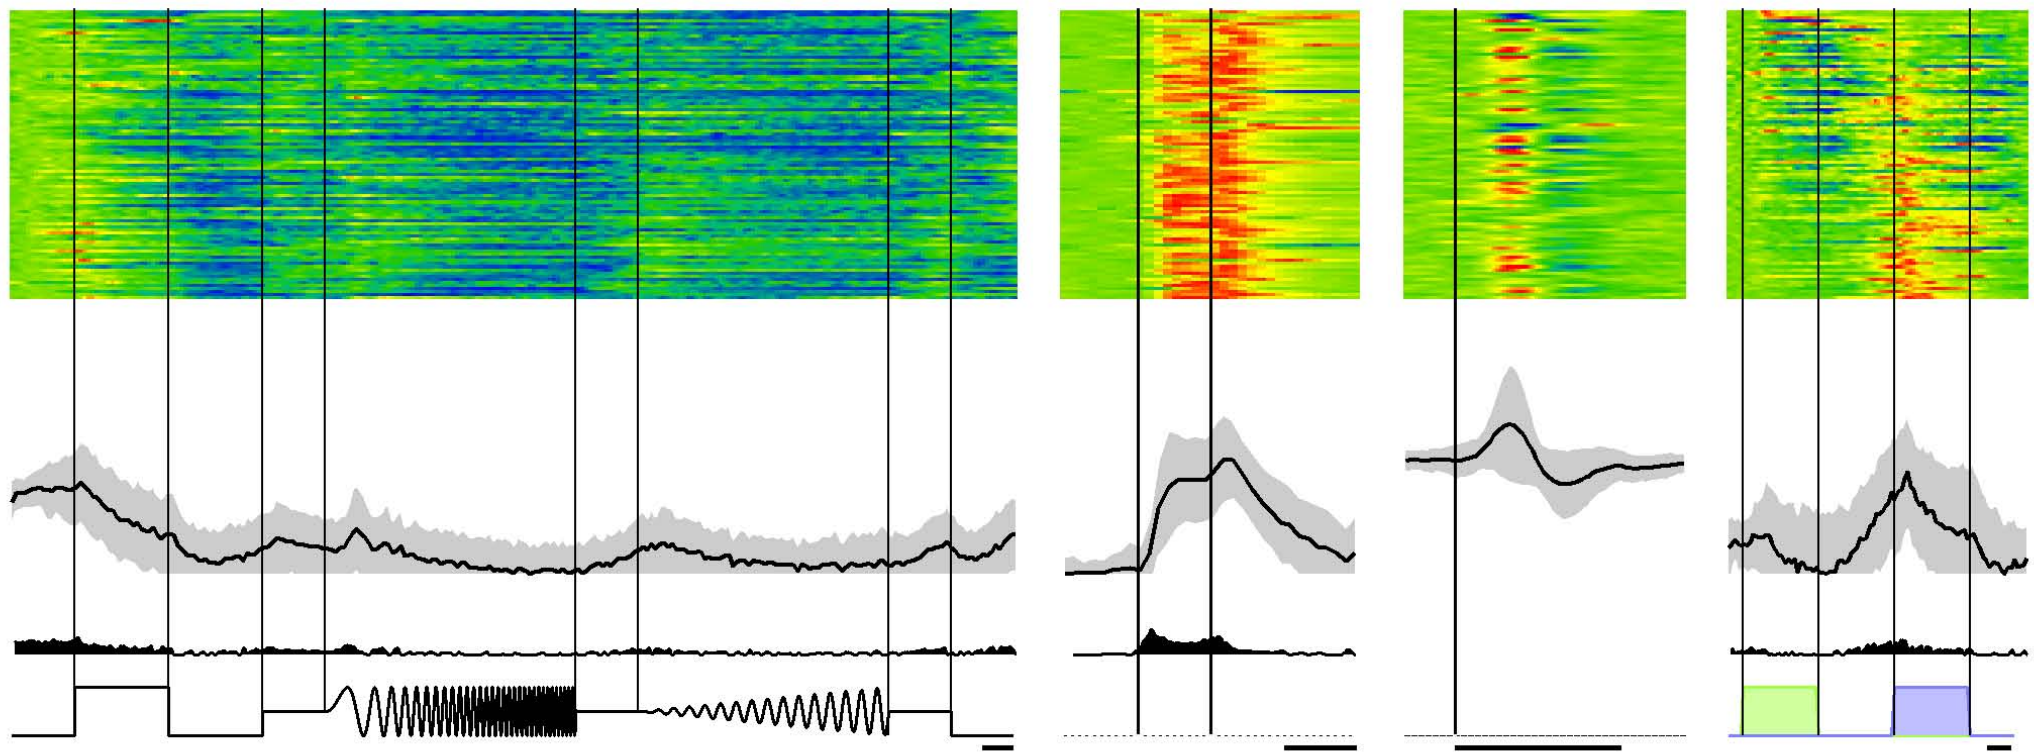

**b**

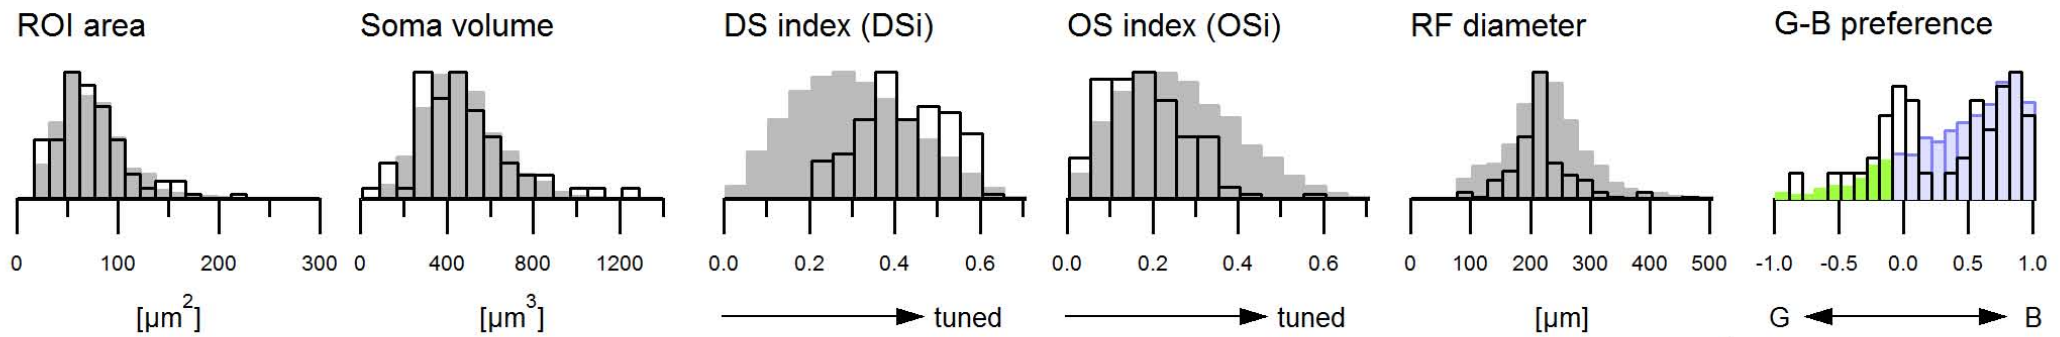

**c**

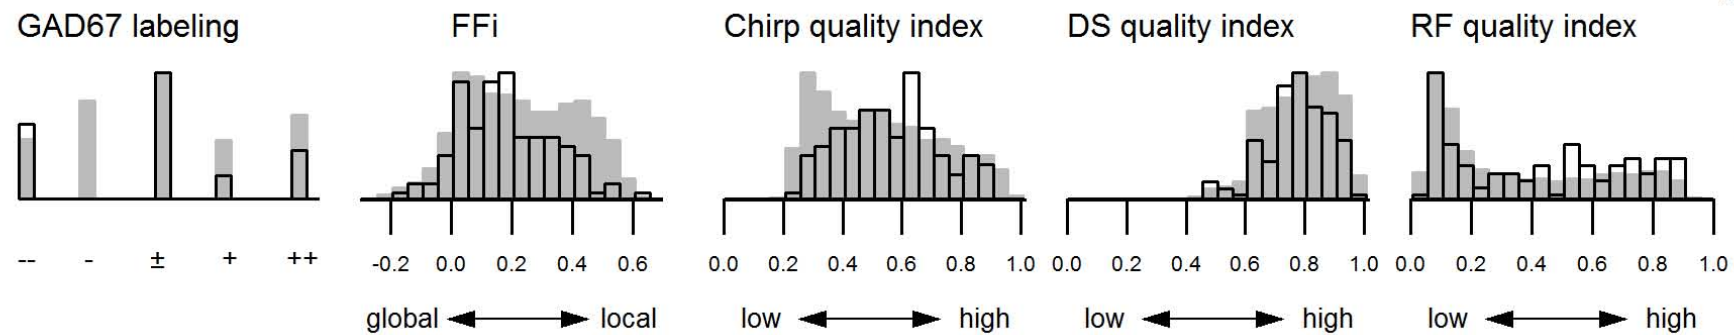

**d**

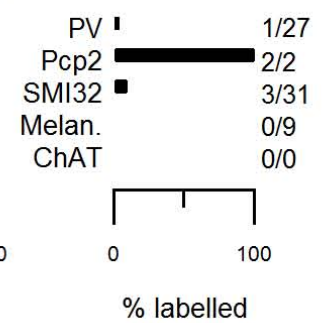

**Group 31 OFF suppr. 1 (c)**

n = 94 Cells, 1.18%, (1.87% of RGCs); CF: 1.52



SFig. 3-45 a

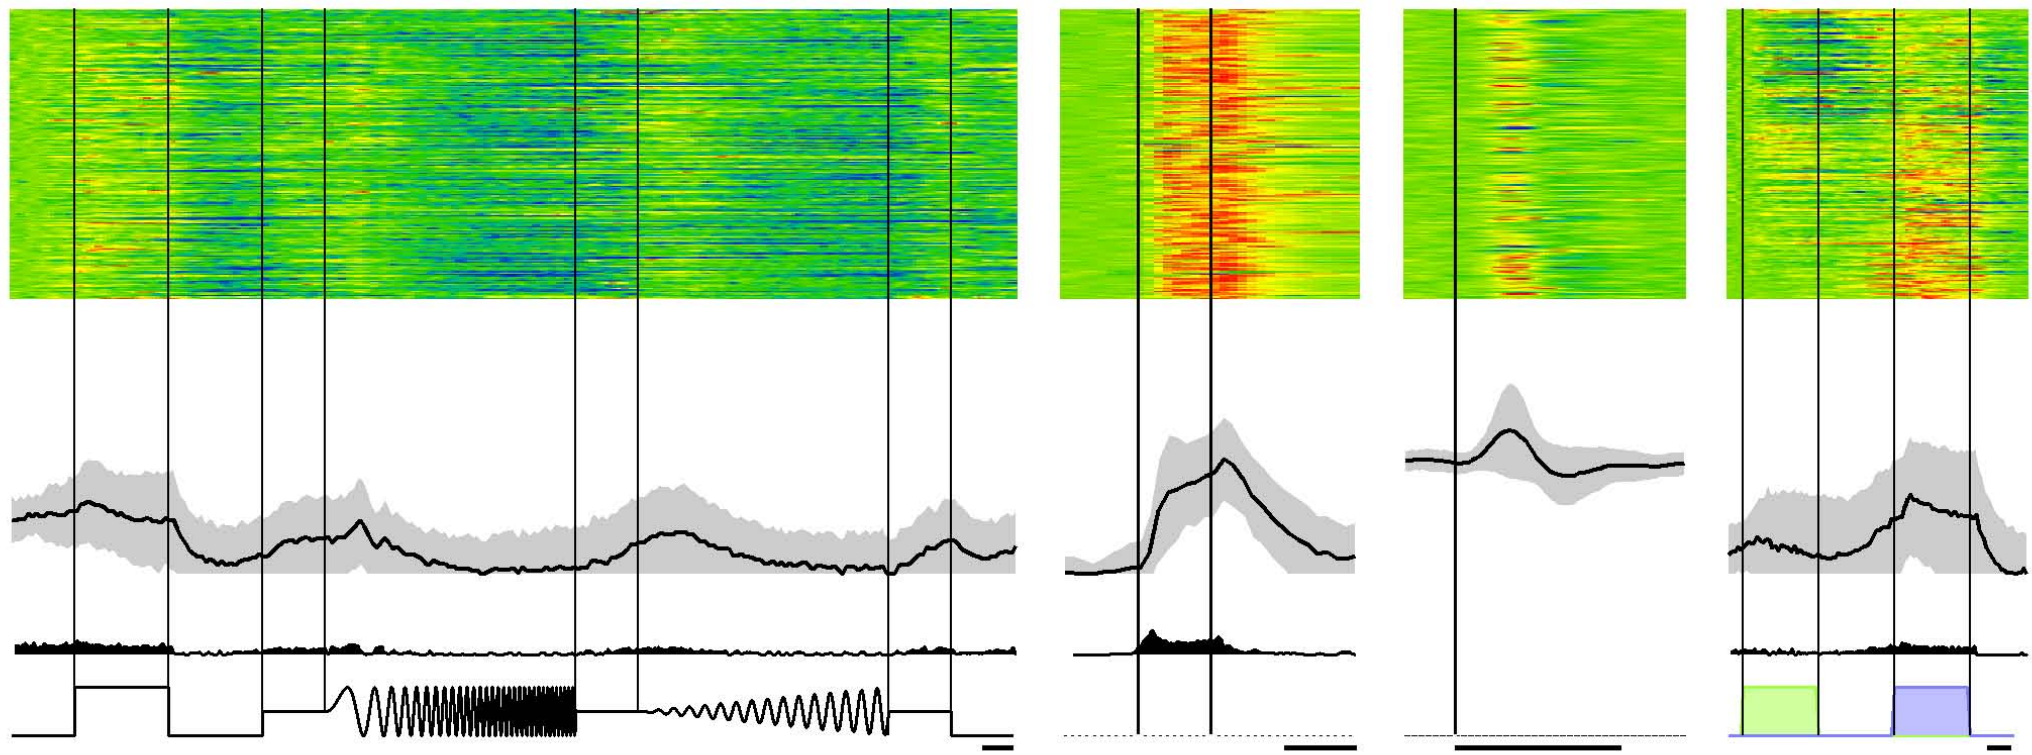

**b**

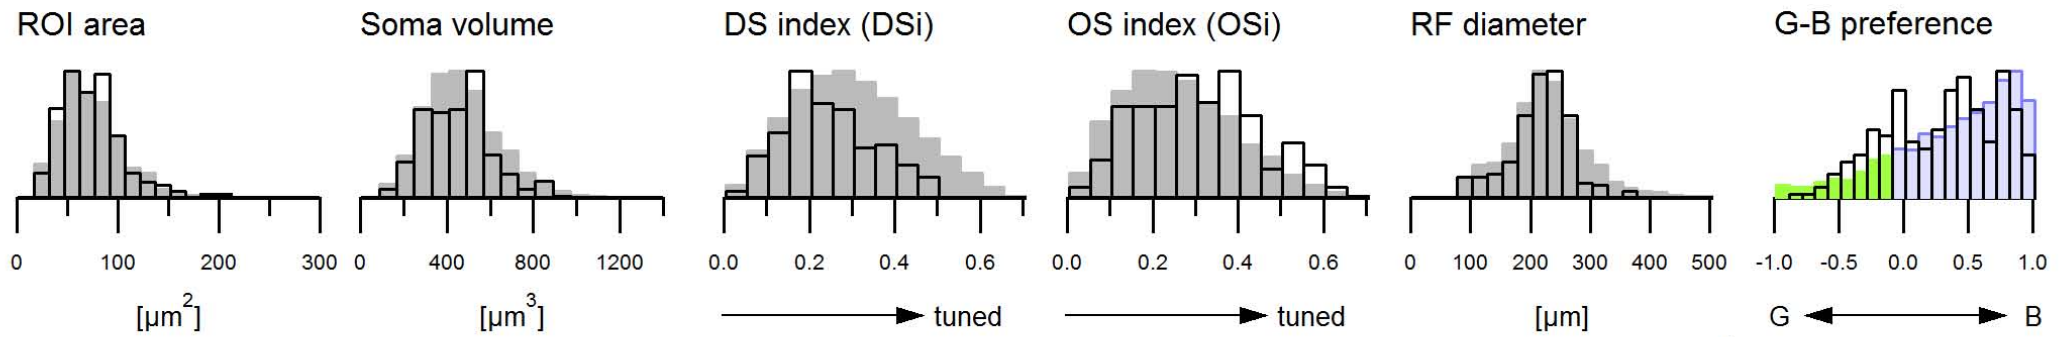

**c**

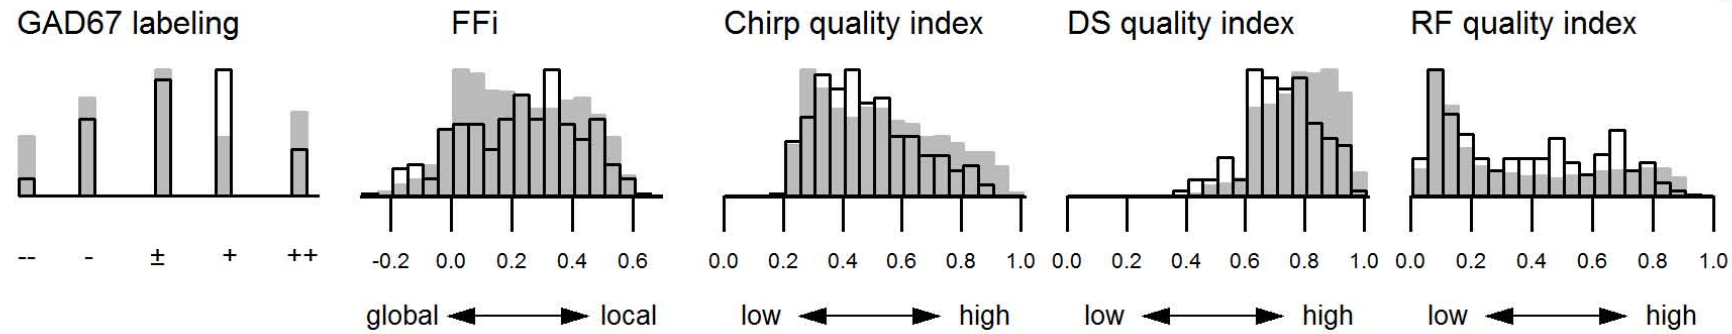

**d**

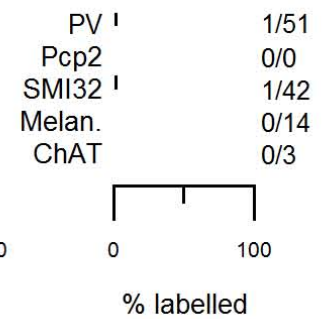

**Group 31** OFF suppr. 1 (d)

n = 207 Cells, 2.59%, (4.12% of RGCs); CF: 3.41

SFig. 3-46 a

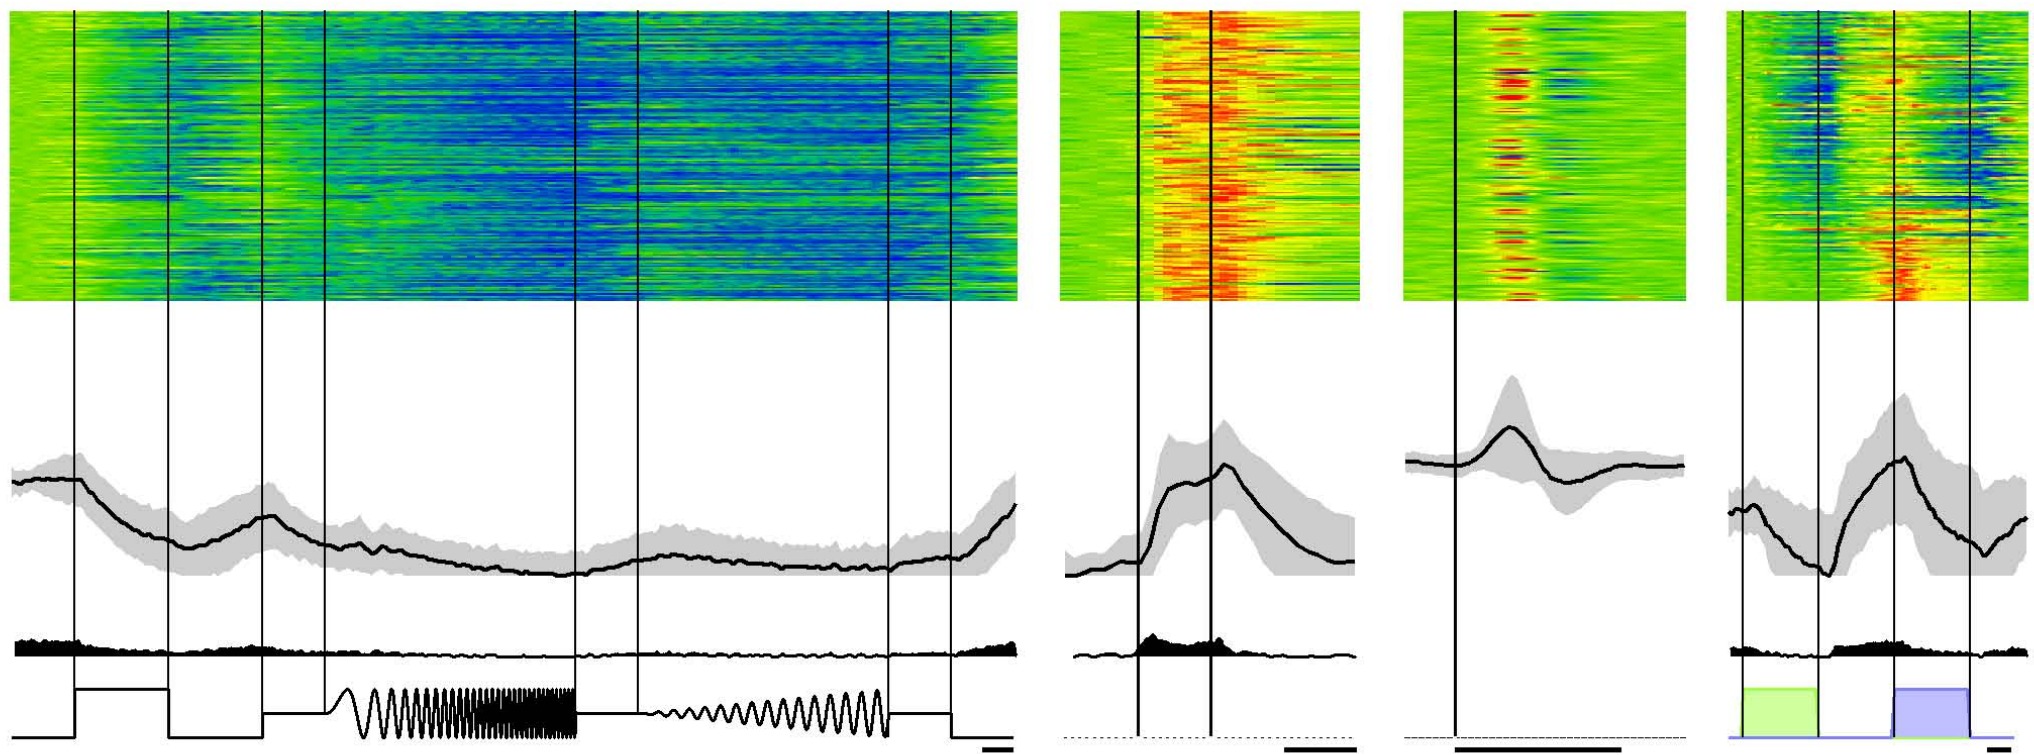

**b**

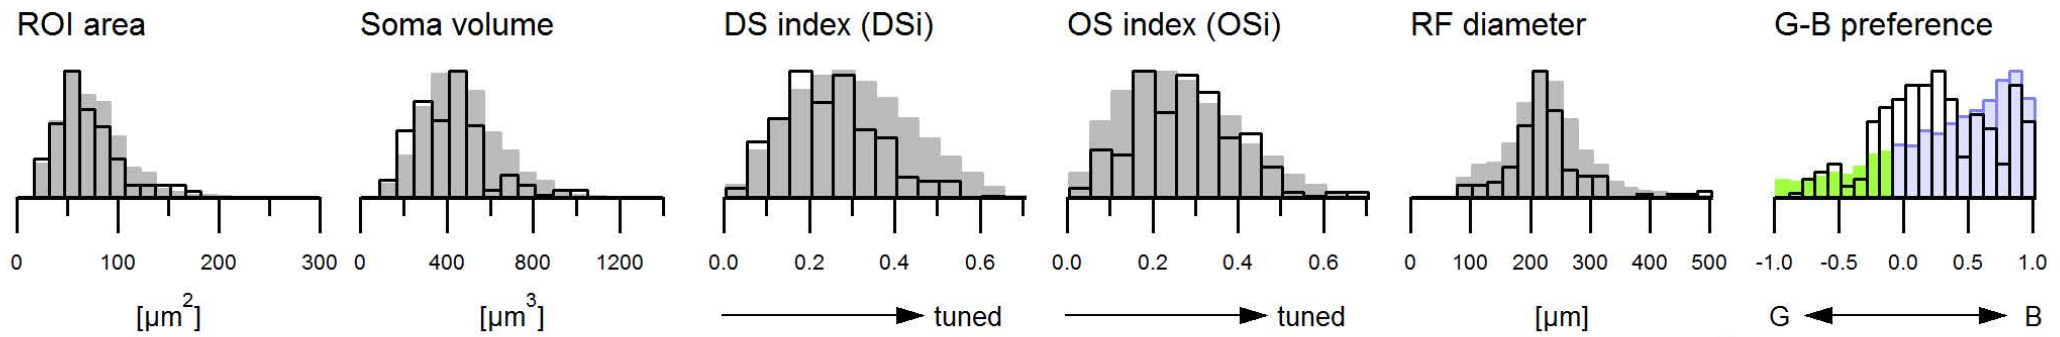

**c**

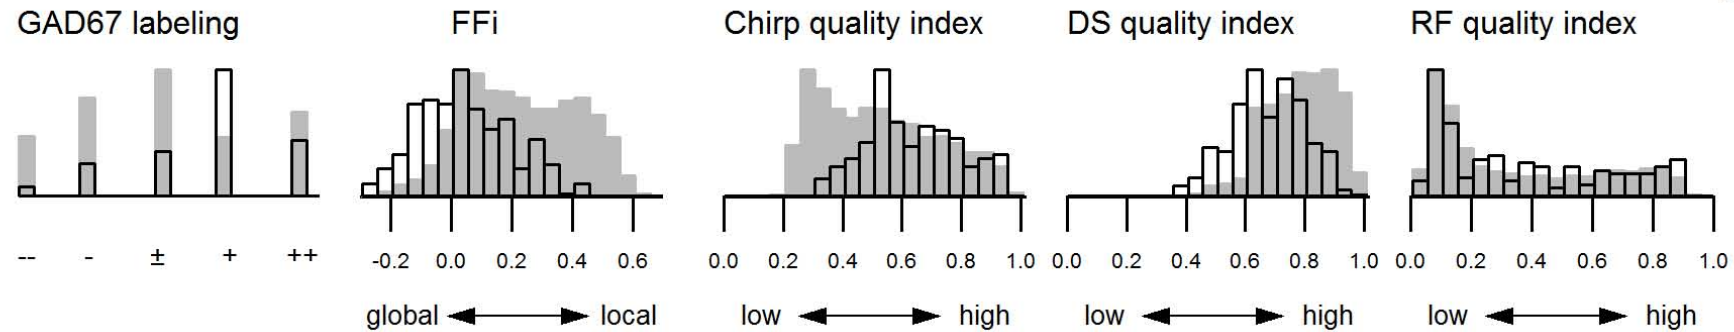

**d**

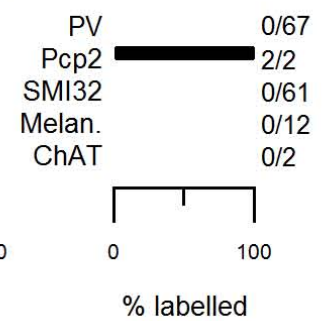

**Group 31 OFF suppr. 1 (e)**

n = 180 Cells, 2.26%, (3.58% of RGCs); CF: 2.86



SFig. 3-47 a

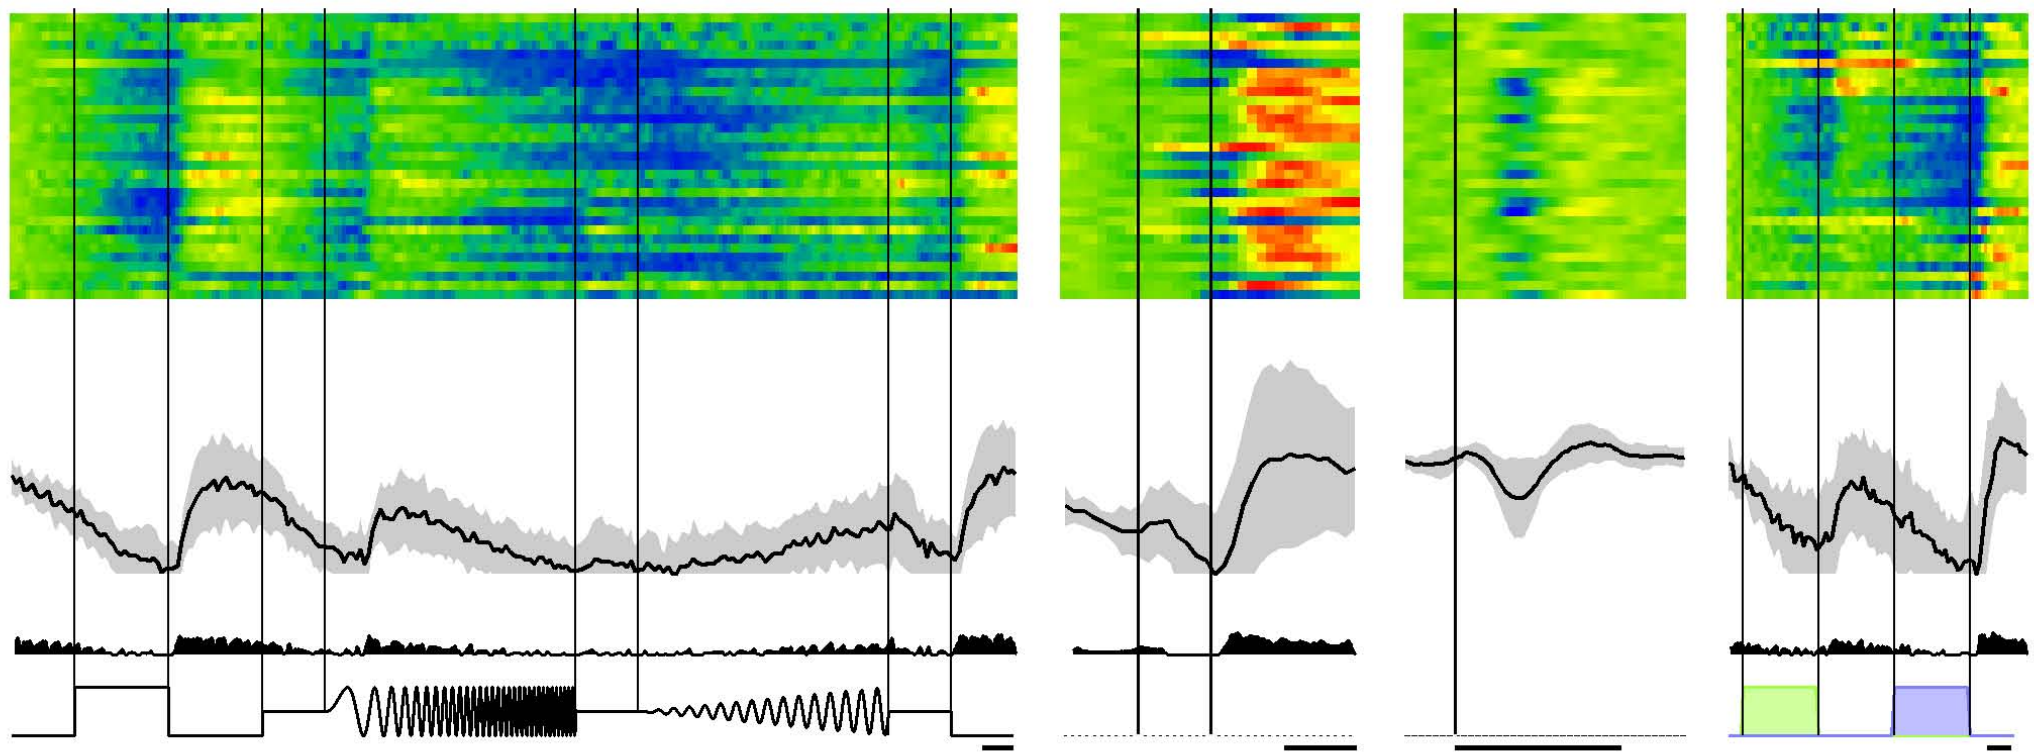

**b**

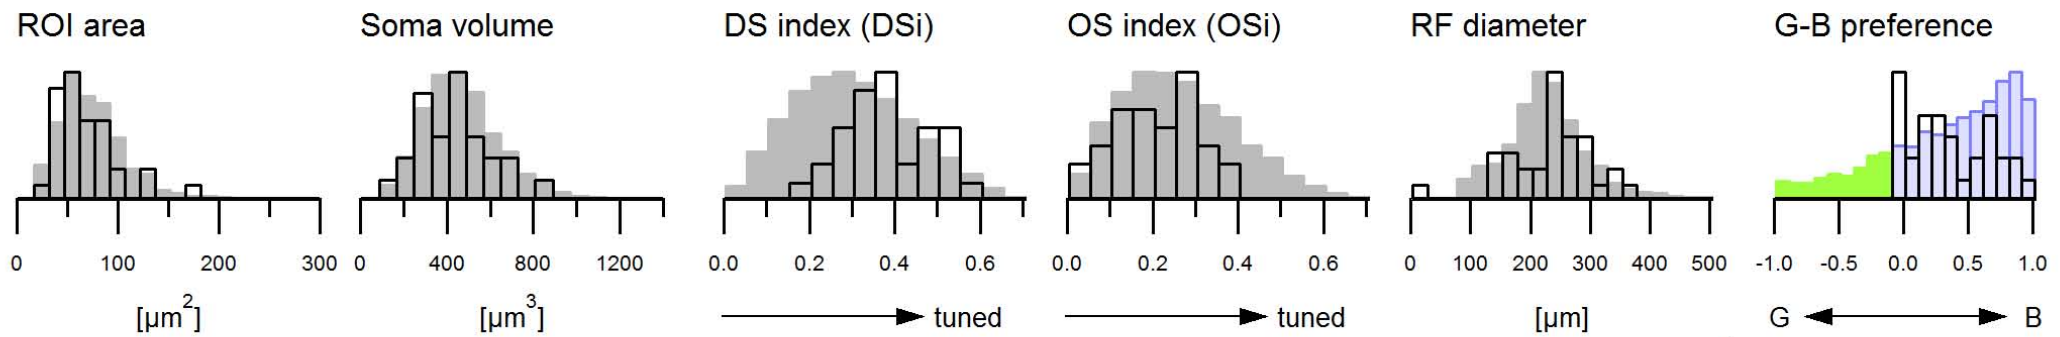

**c**

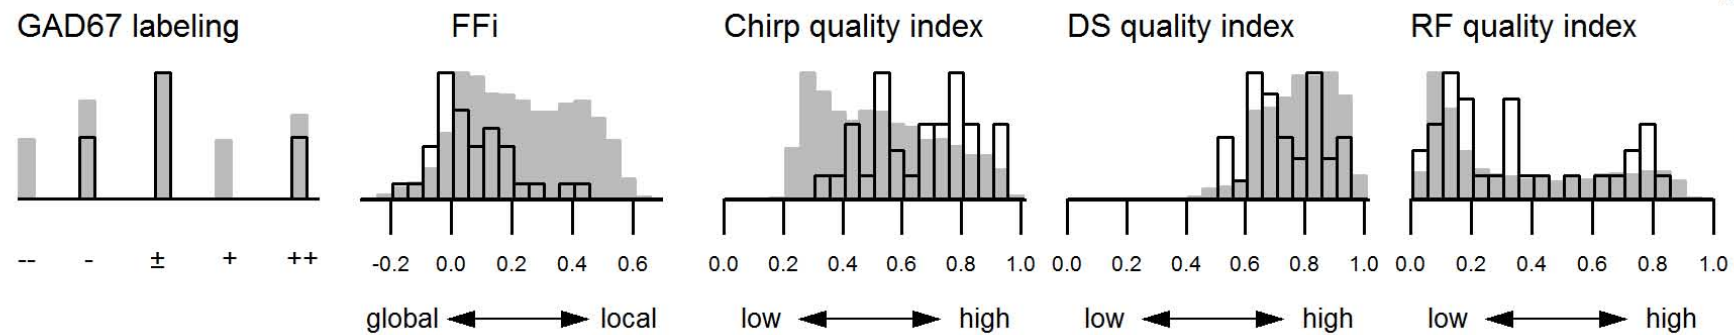

**d**

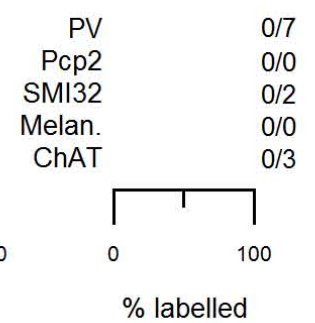

**Group 32 OFF suppr. 2 (a)**

n = 31 Cells, 0.39%, (0.62% of RGCs); CF: 0.71

SFig. 3-48 a

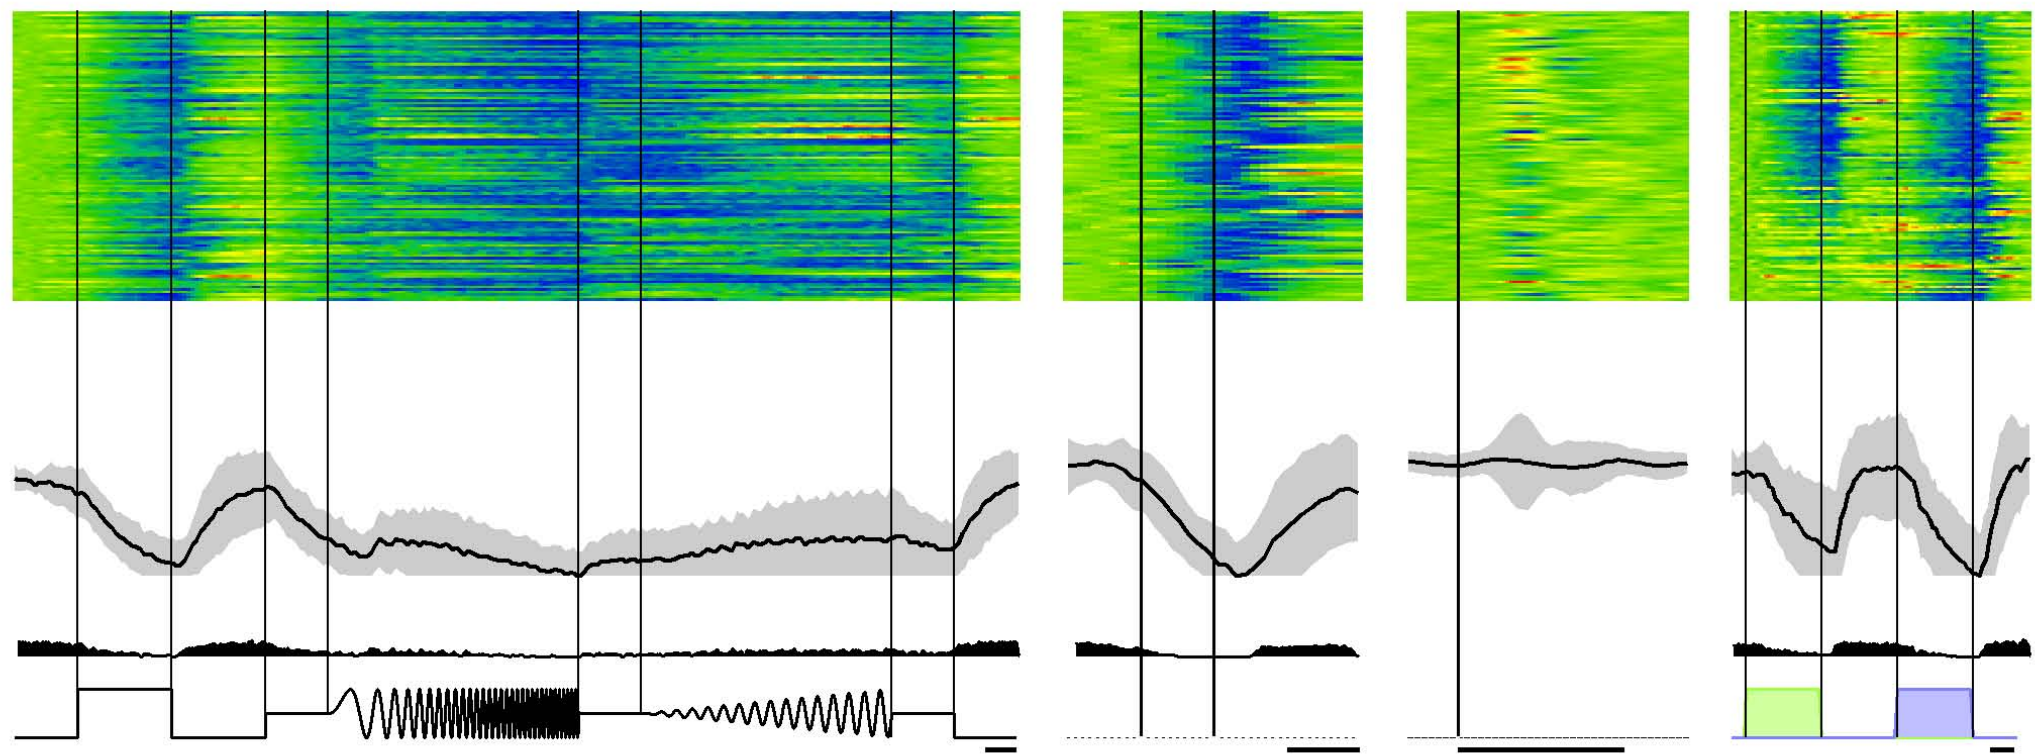

**b**

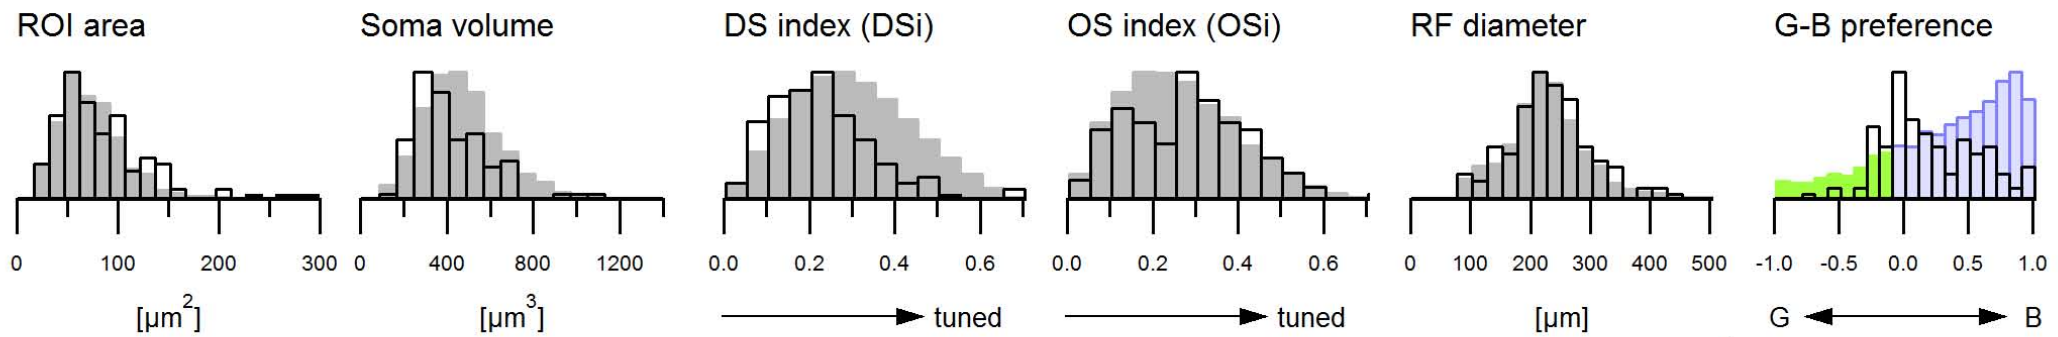

**c**

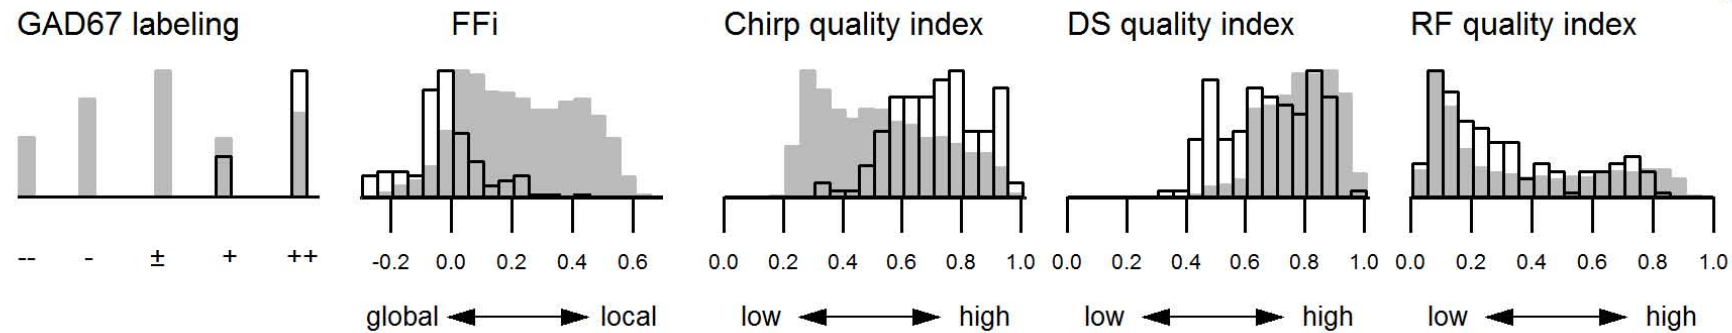

**d**

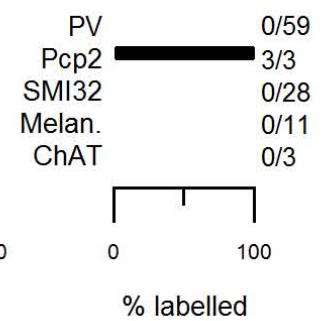

**Group 32 OFF suppr. 2 (b)**

n = 112 Cells, 1.4%, (2.23% of RGCs); CF: 2.08



SFig. 3-49 a

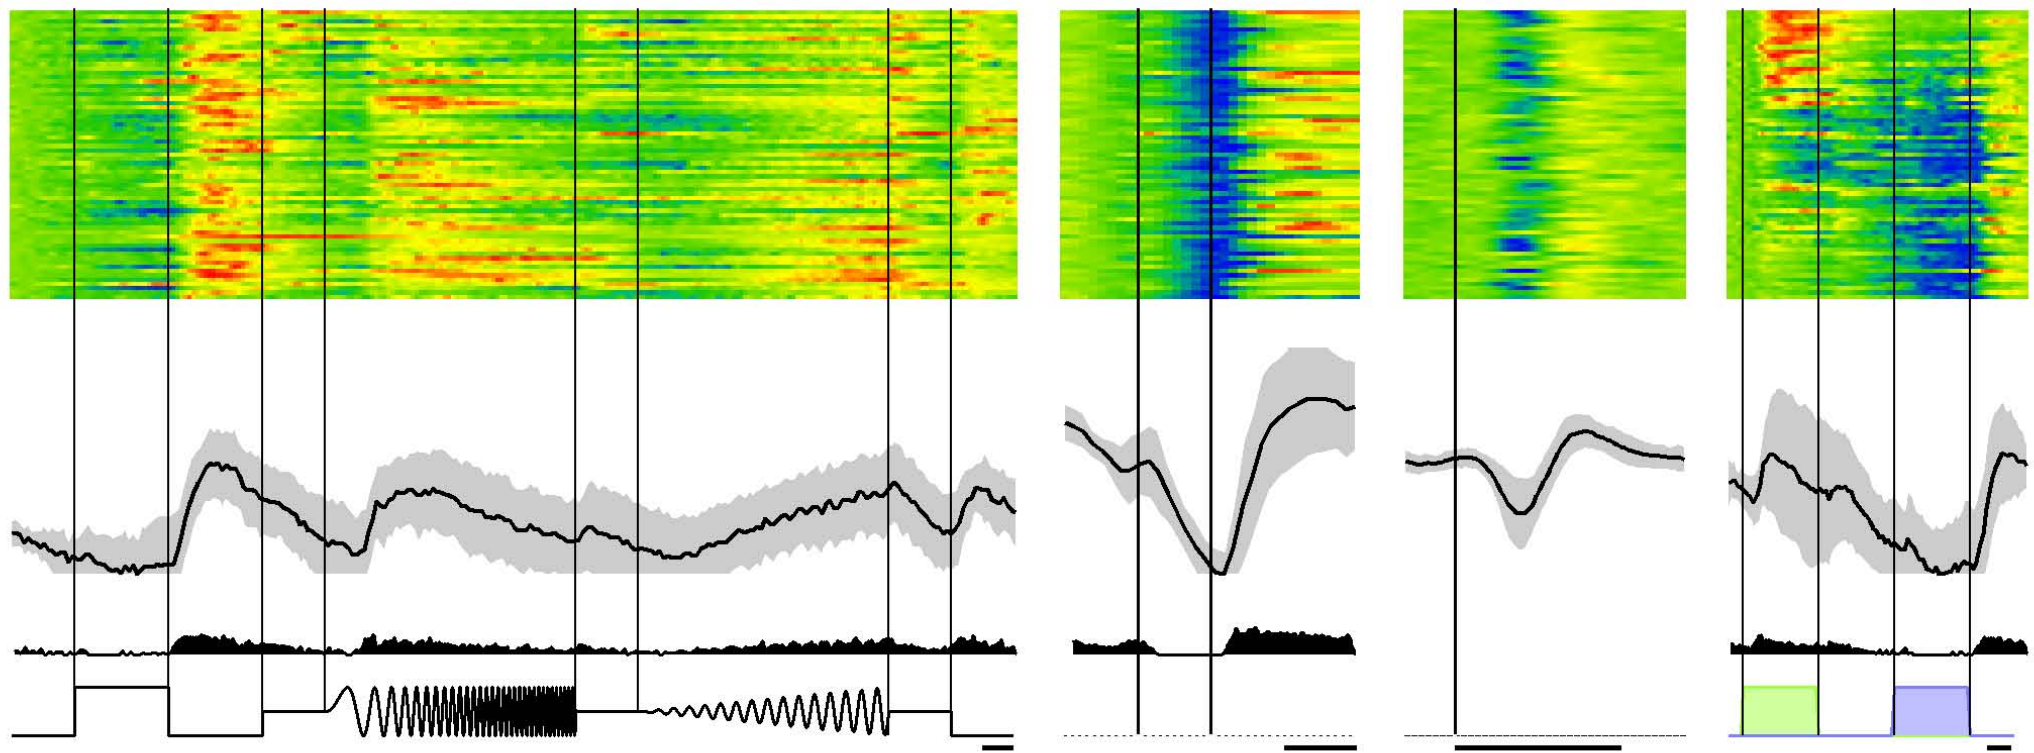

**b**

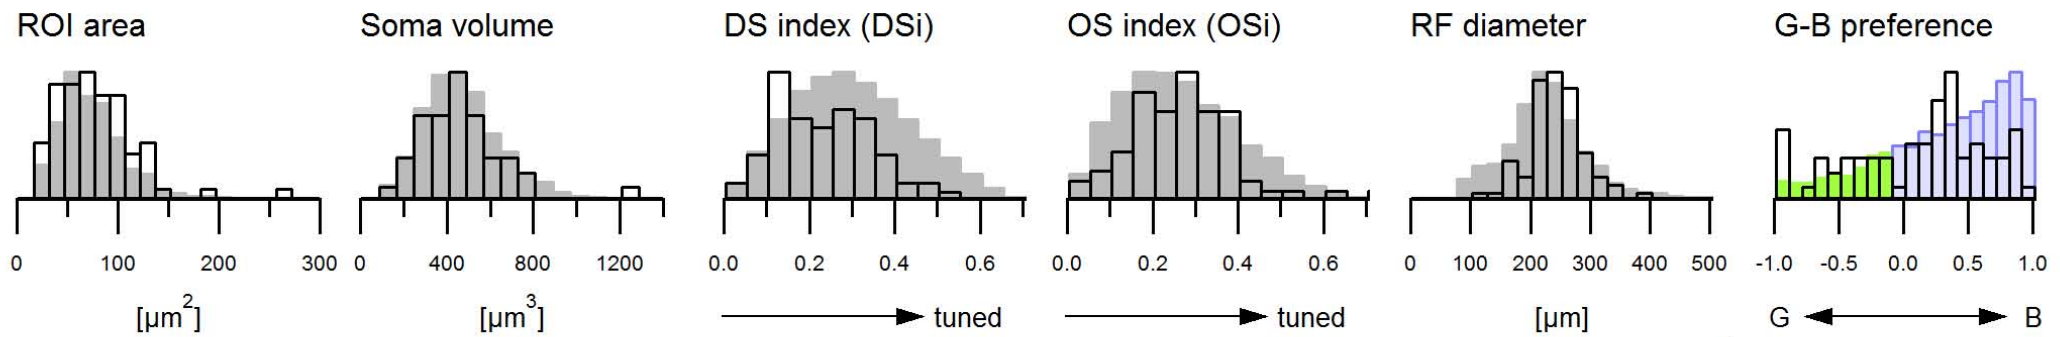

**c**

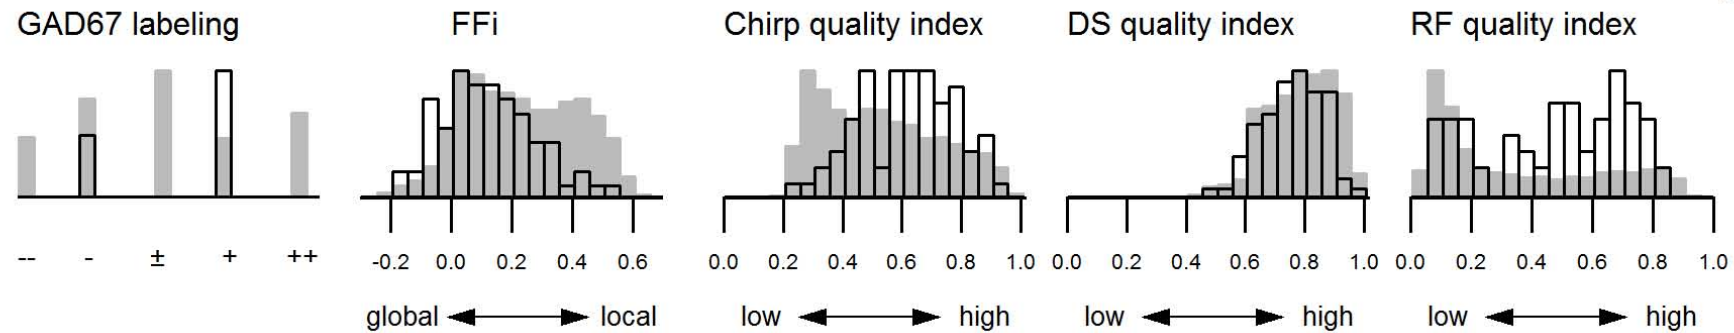

**d**

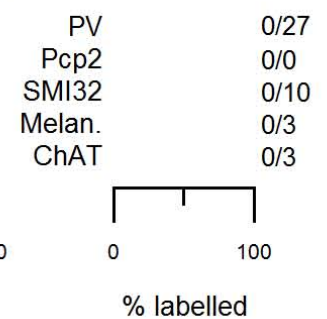

**Group 32 OFF suppr. 2 (c)**

n = 67 Cells, 0.84%, (1.33% of RGCs); CF: 1.3

SFig. 3-50 a

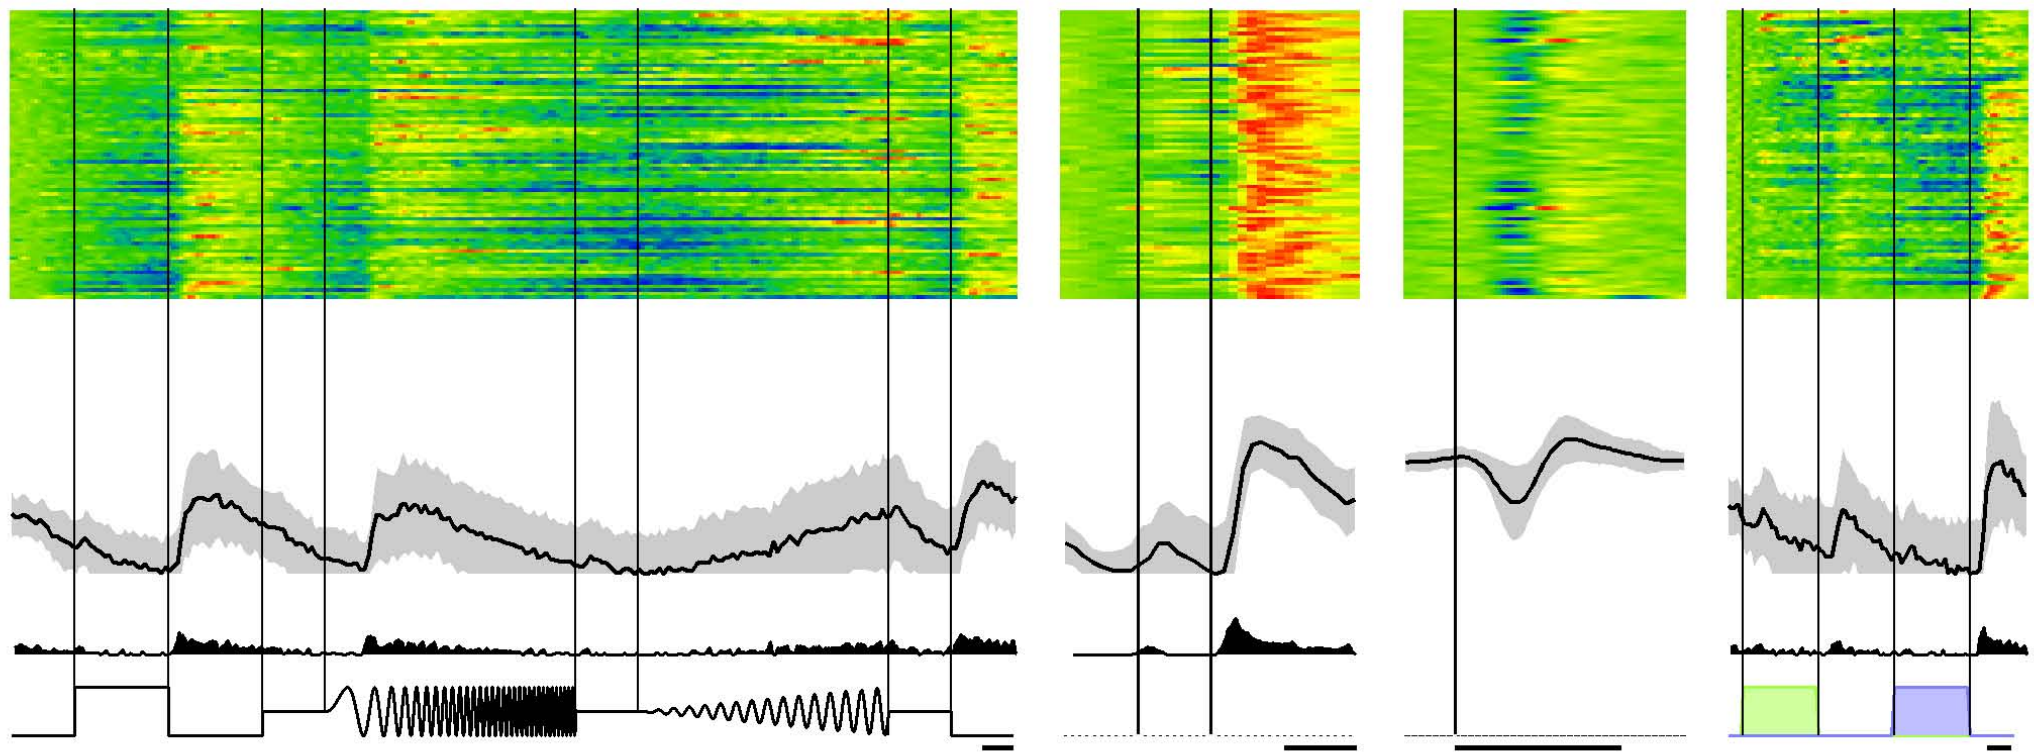

**b**

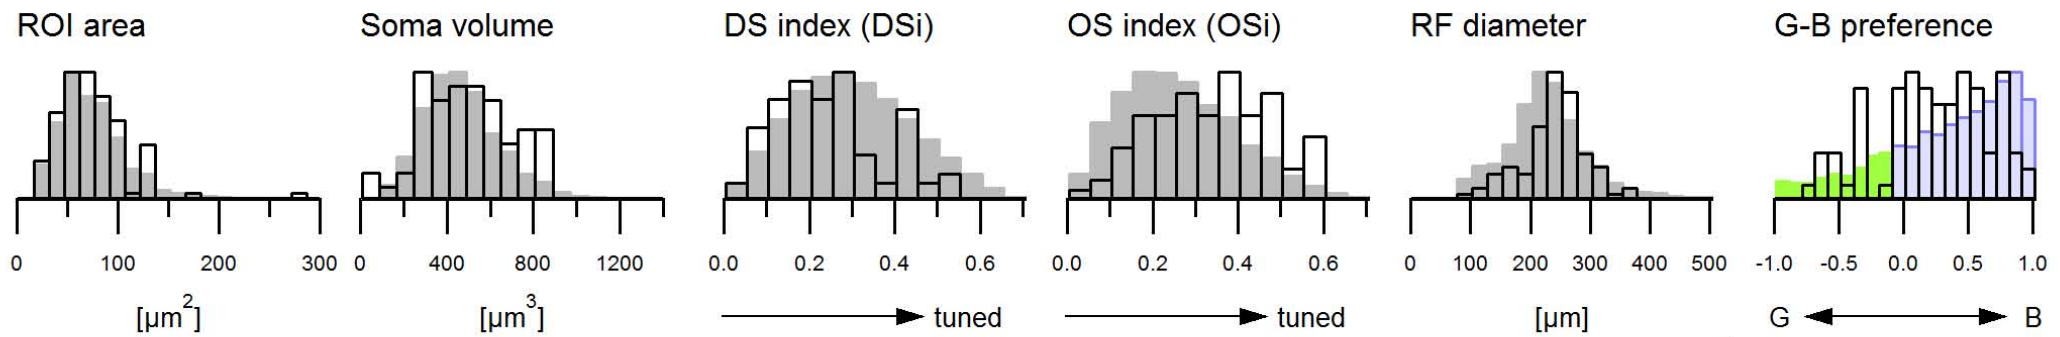

**c**

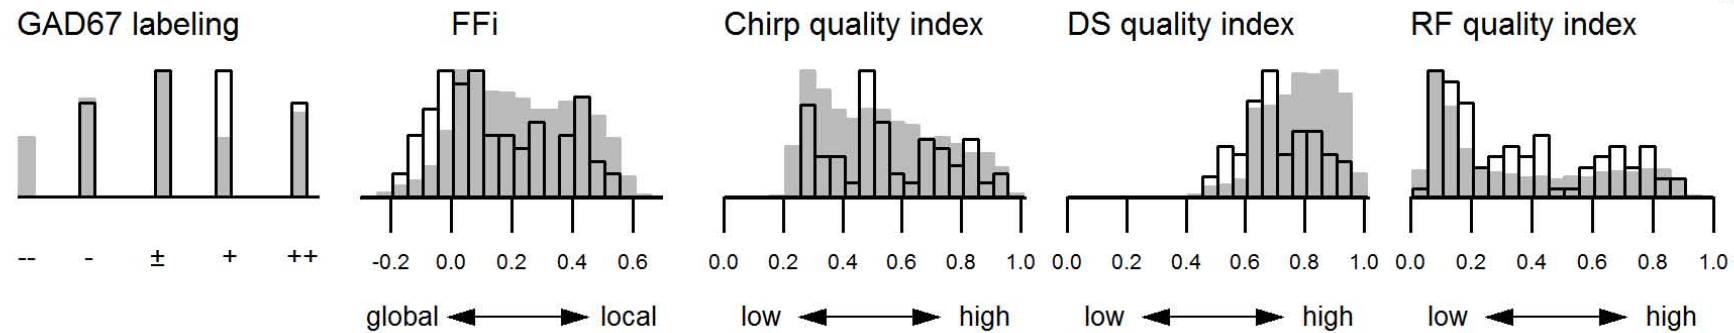

**d**

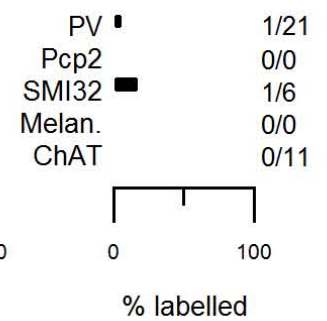

**Group 33 AC OFF**

81 Cells, 1.01%, (2.74% of ACs); CF: 1.61



SFig. 3-51 a

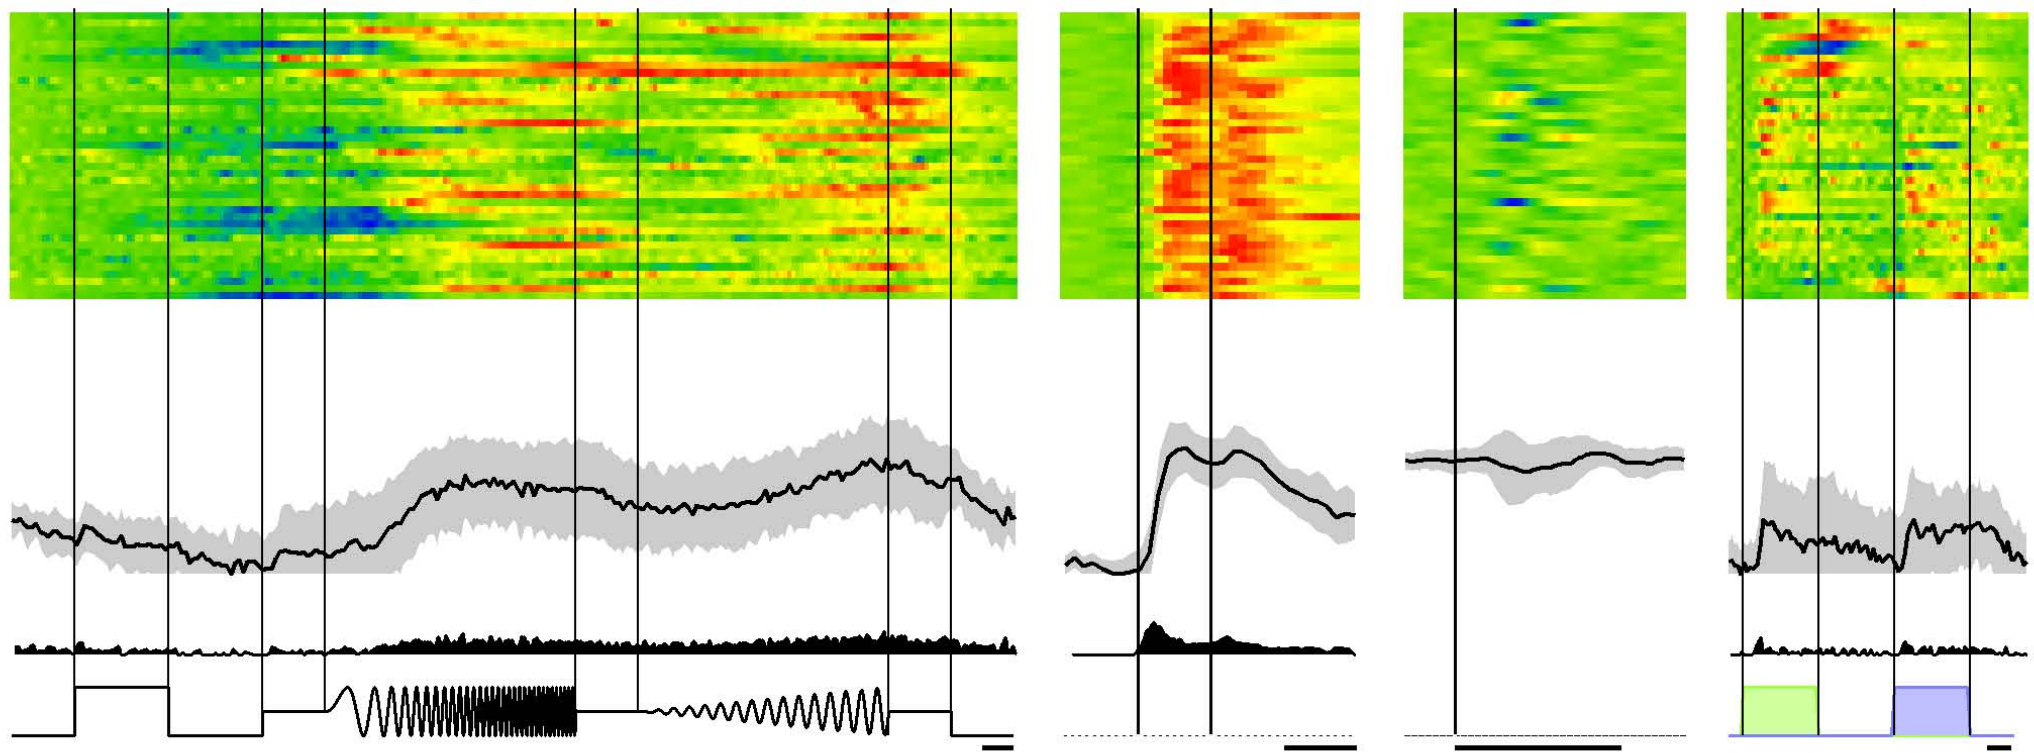

**b**

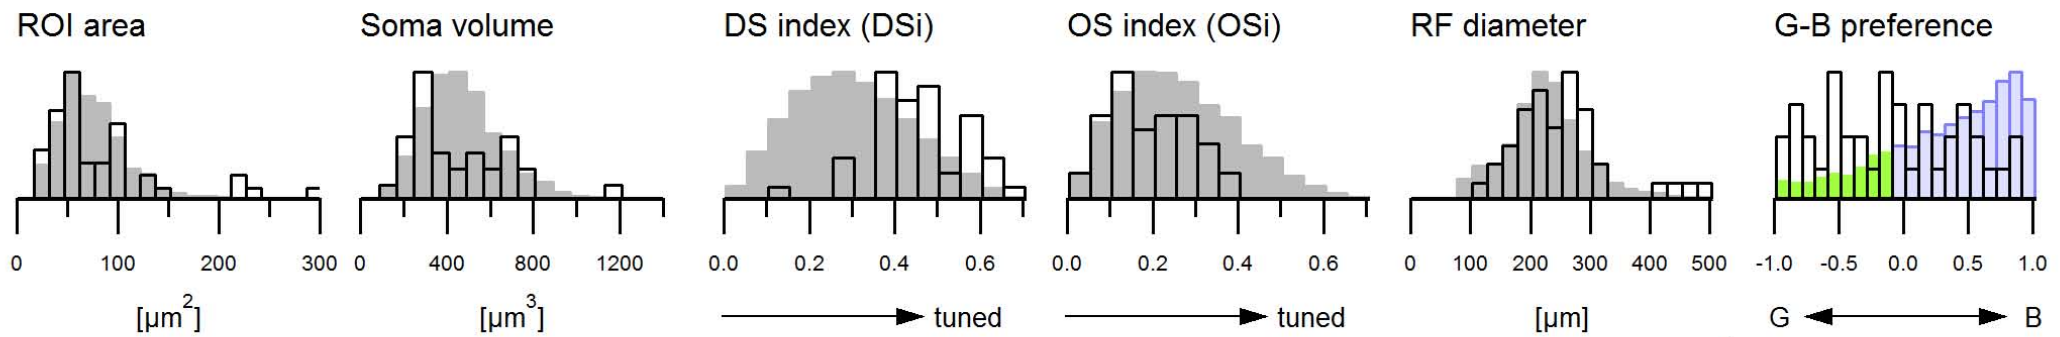

**c**

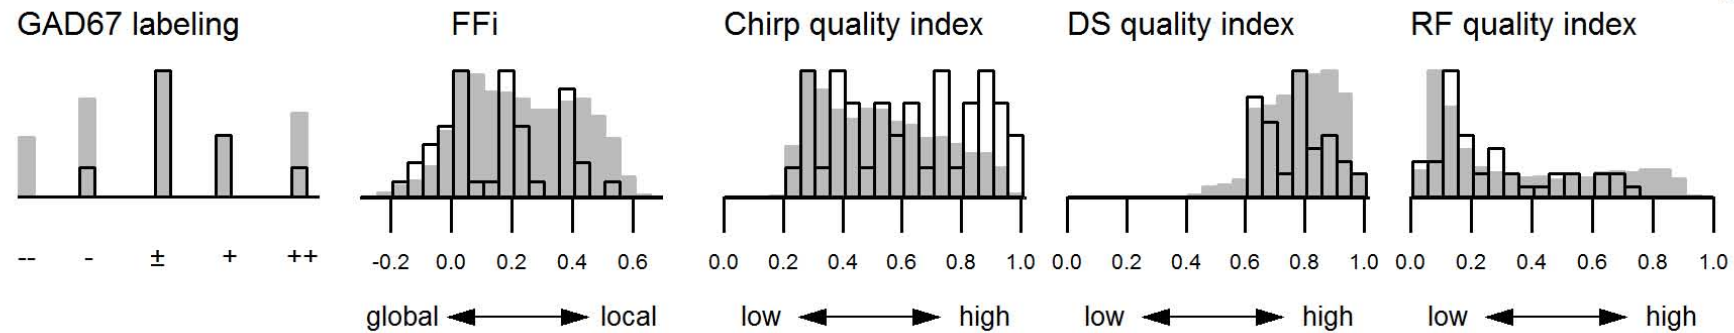

**d**

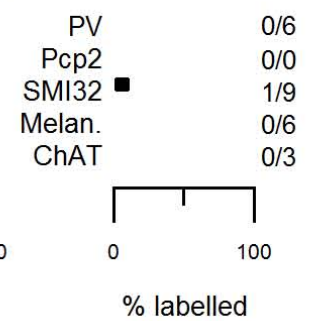

**Group 34** AC ON high freq. sust. 1 (a)  
40 Cells, 0.5%, (1.35% of ACs); CF: 0.75

SFig. 3-52 a

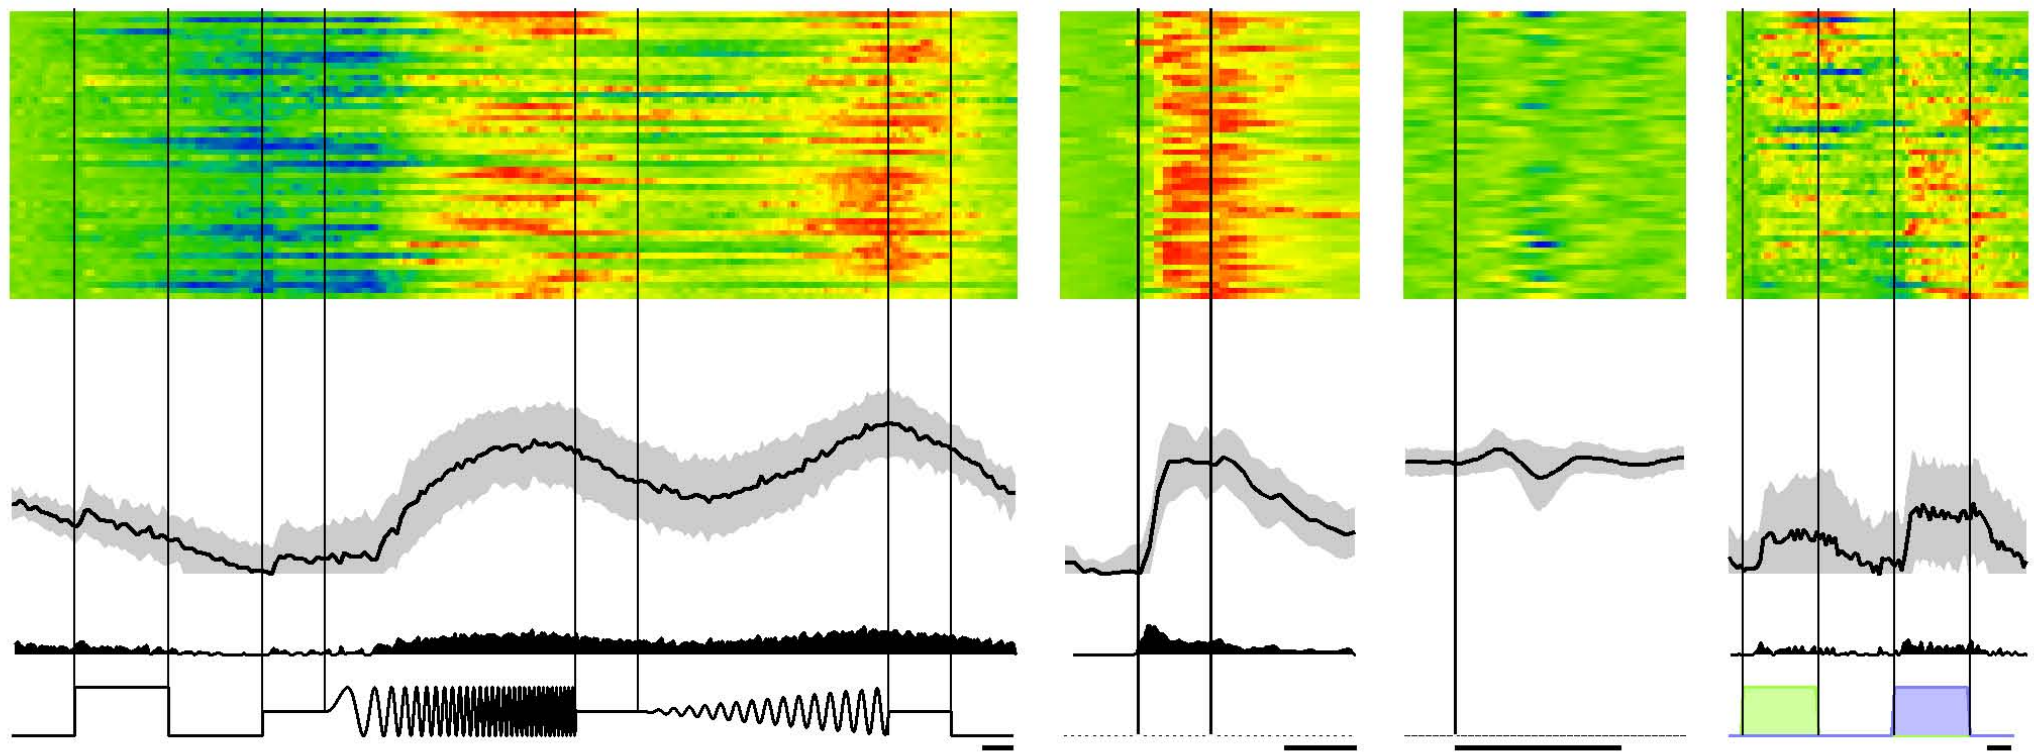

**b**

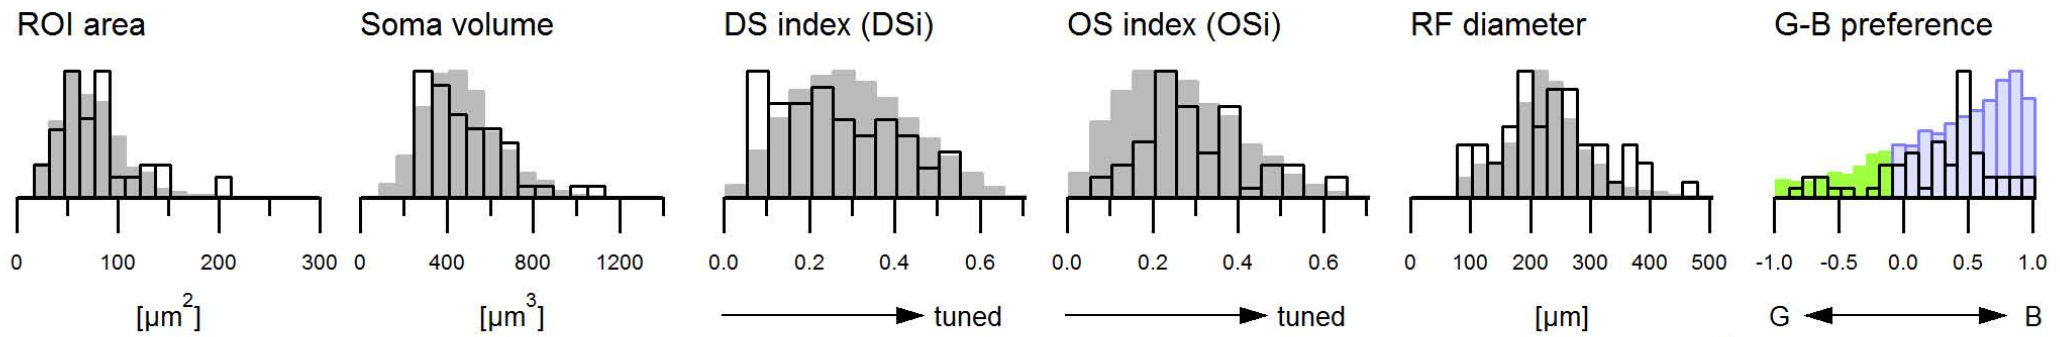

**c**

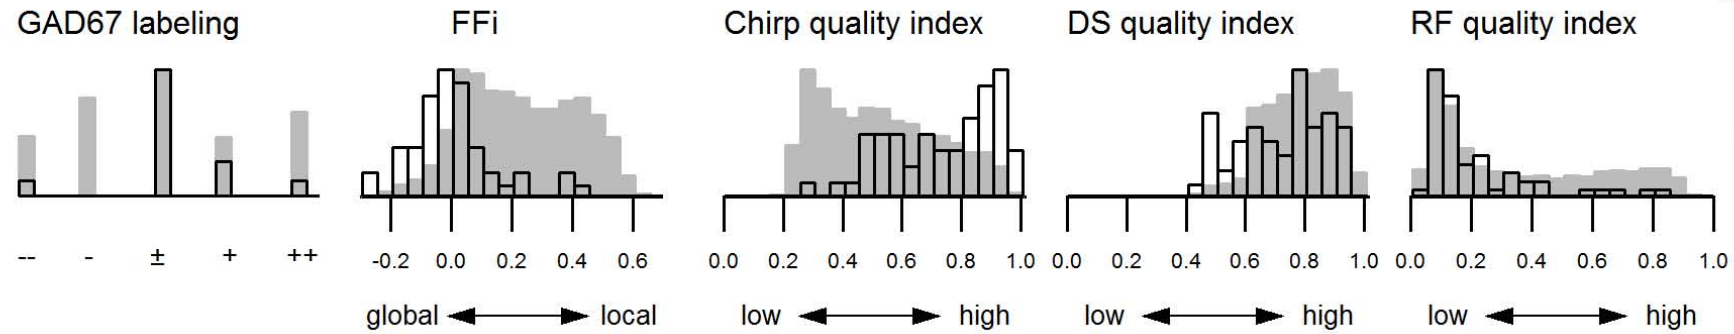

**d**

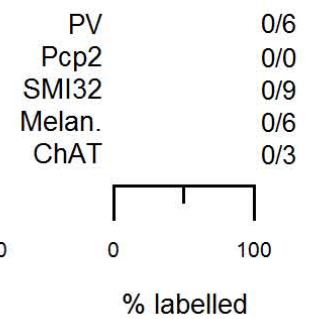

**Group 34** AC ON high freq. sust. 1 (b)  
50 Cells, 0.63%, (1.69% of ACs); CF: 1.18



SFig. 3-53 a

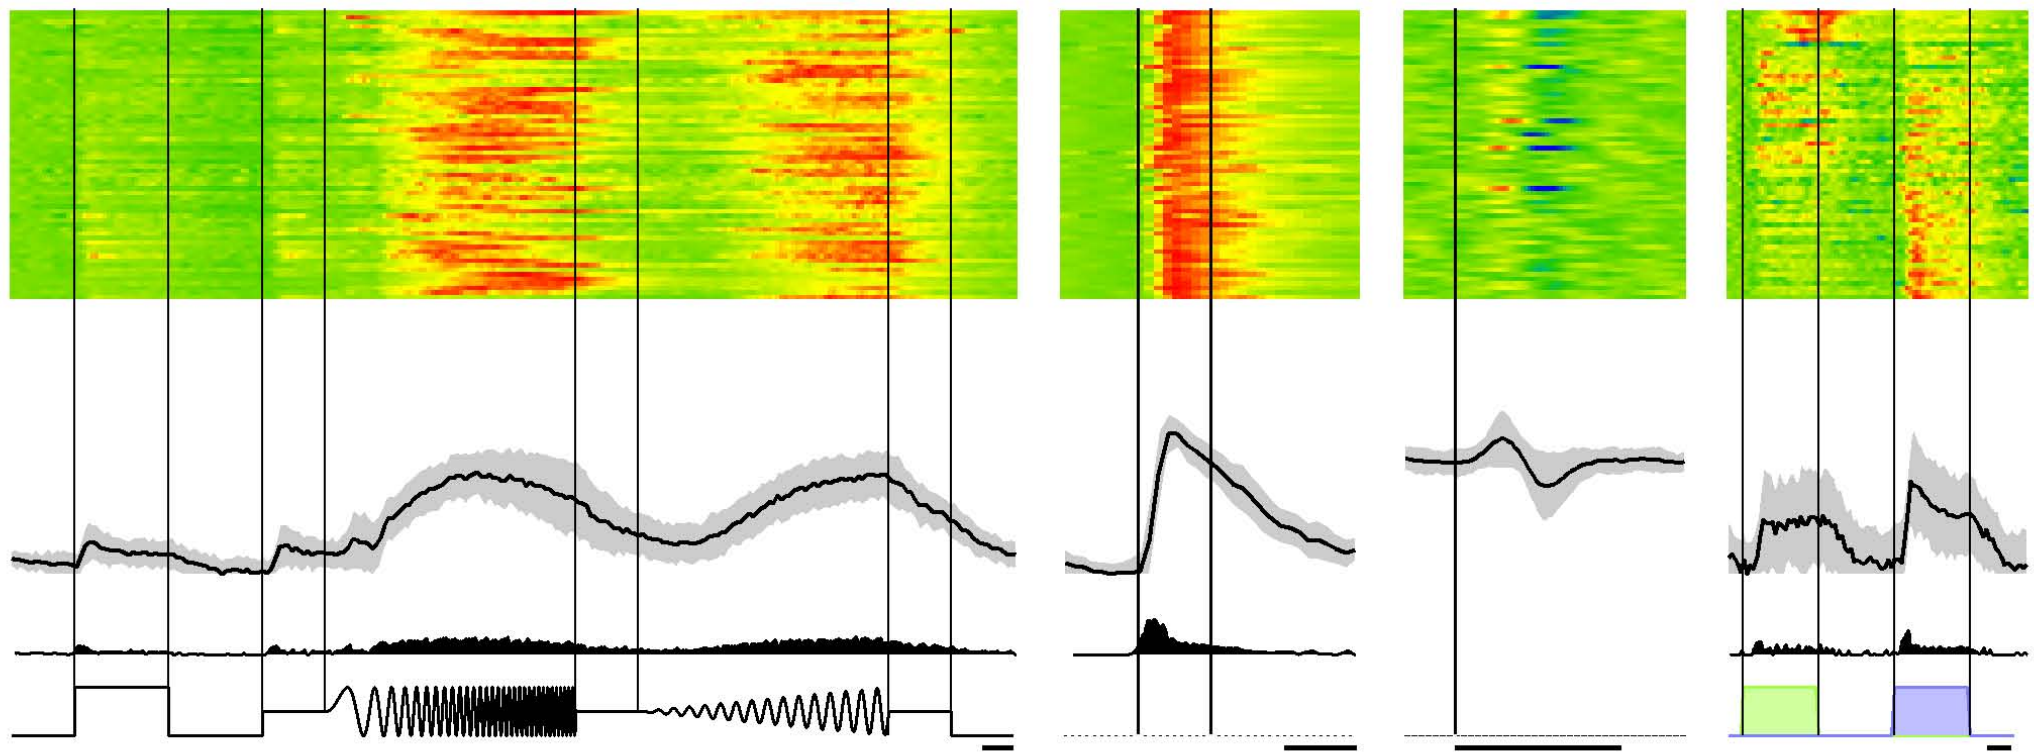

**b**

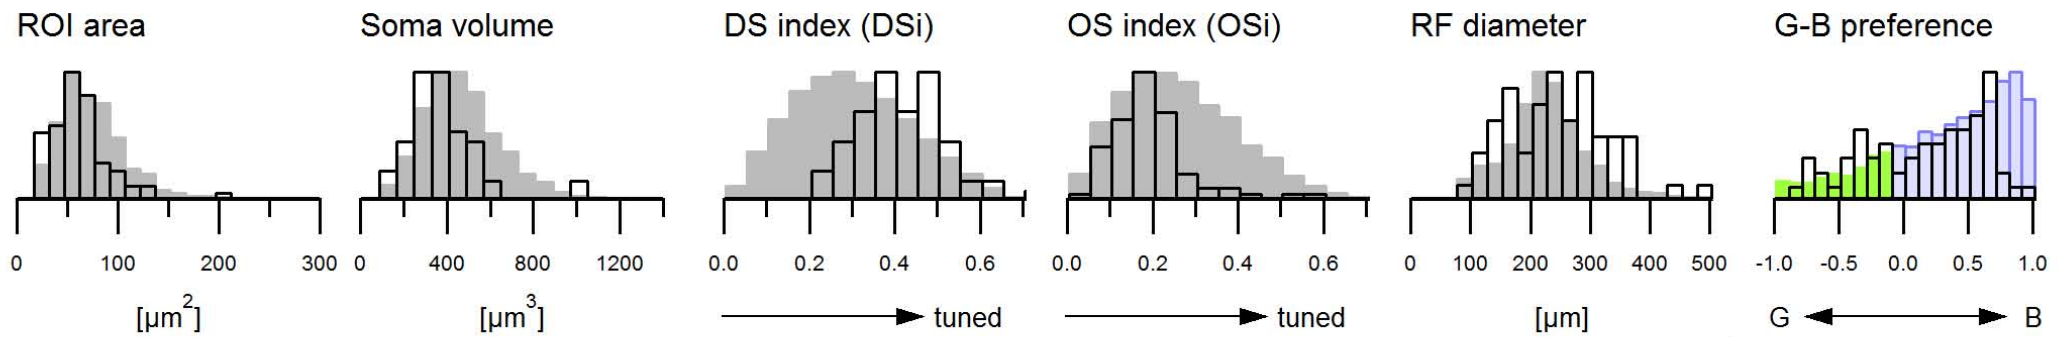

**c**

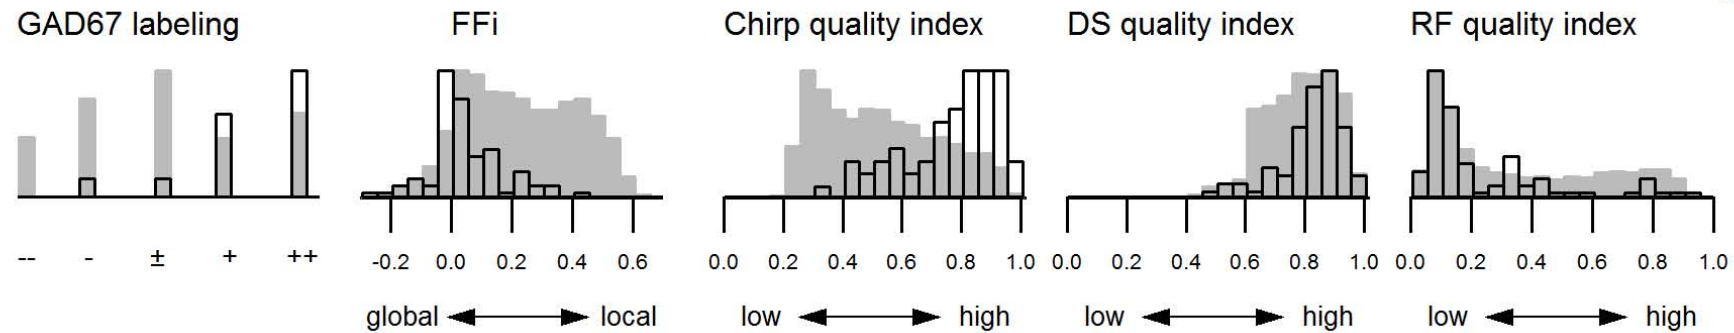

**d**

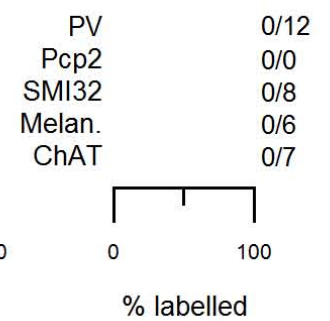

**Group 35** AC ON high freq. trans. (a)  
64 Cells, 0.8%, (2.16% of ACs); CF: 1.42

SFig. 3-54 a

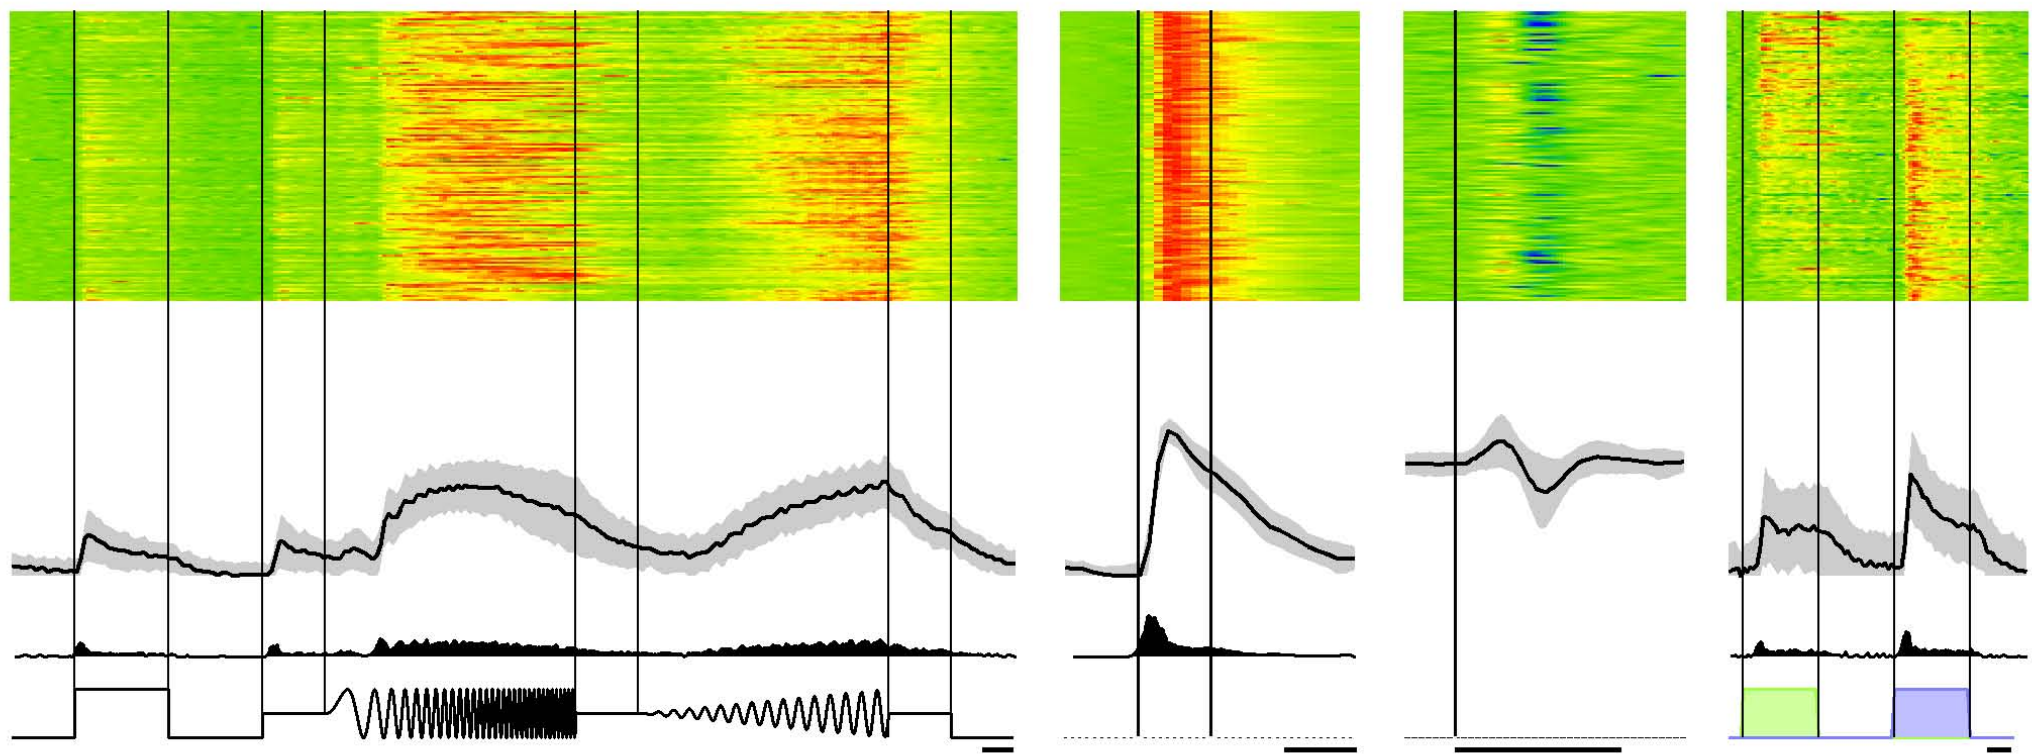

**b**

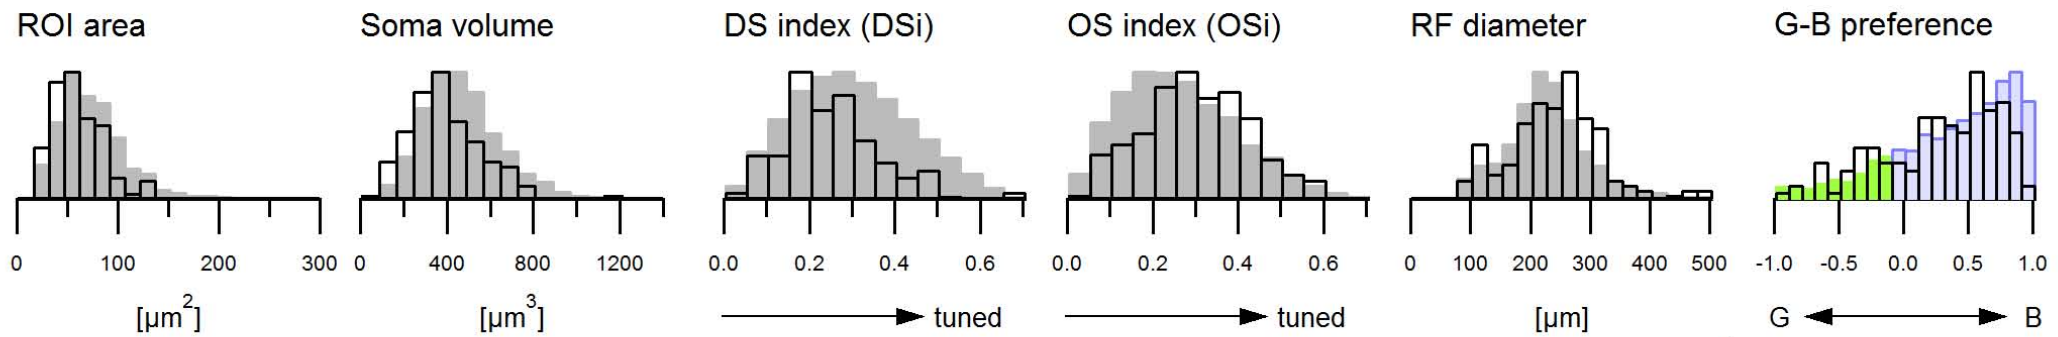

**c**

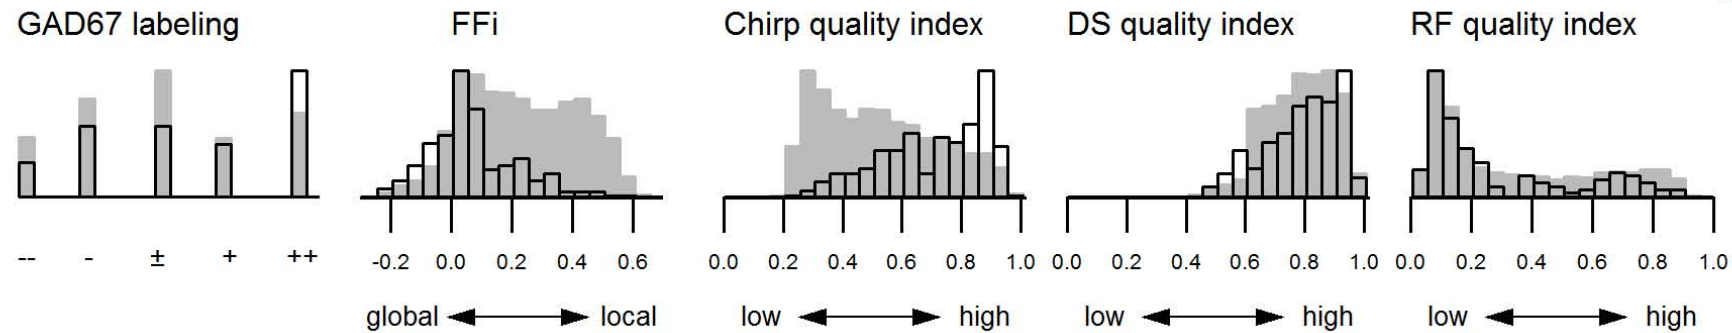

**d**

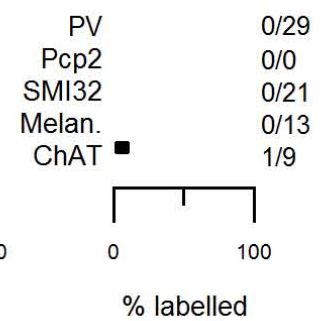

**Group 35** AC ON high freq. trans. (b)  
155 Cells, 1.94%, (5.24% of ACs); CF: 3.35



SFig. 3-55 a

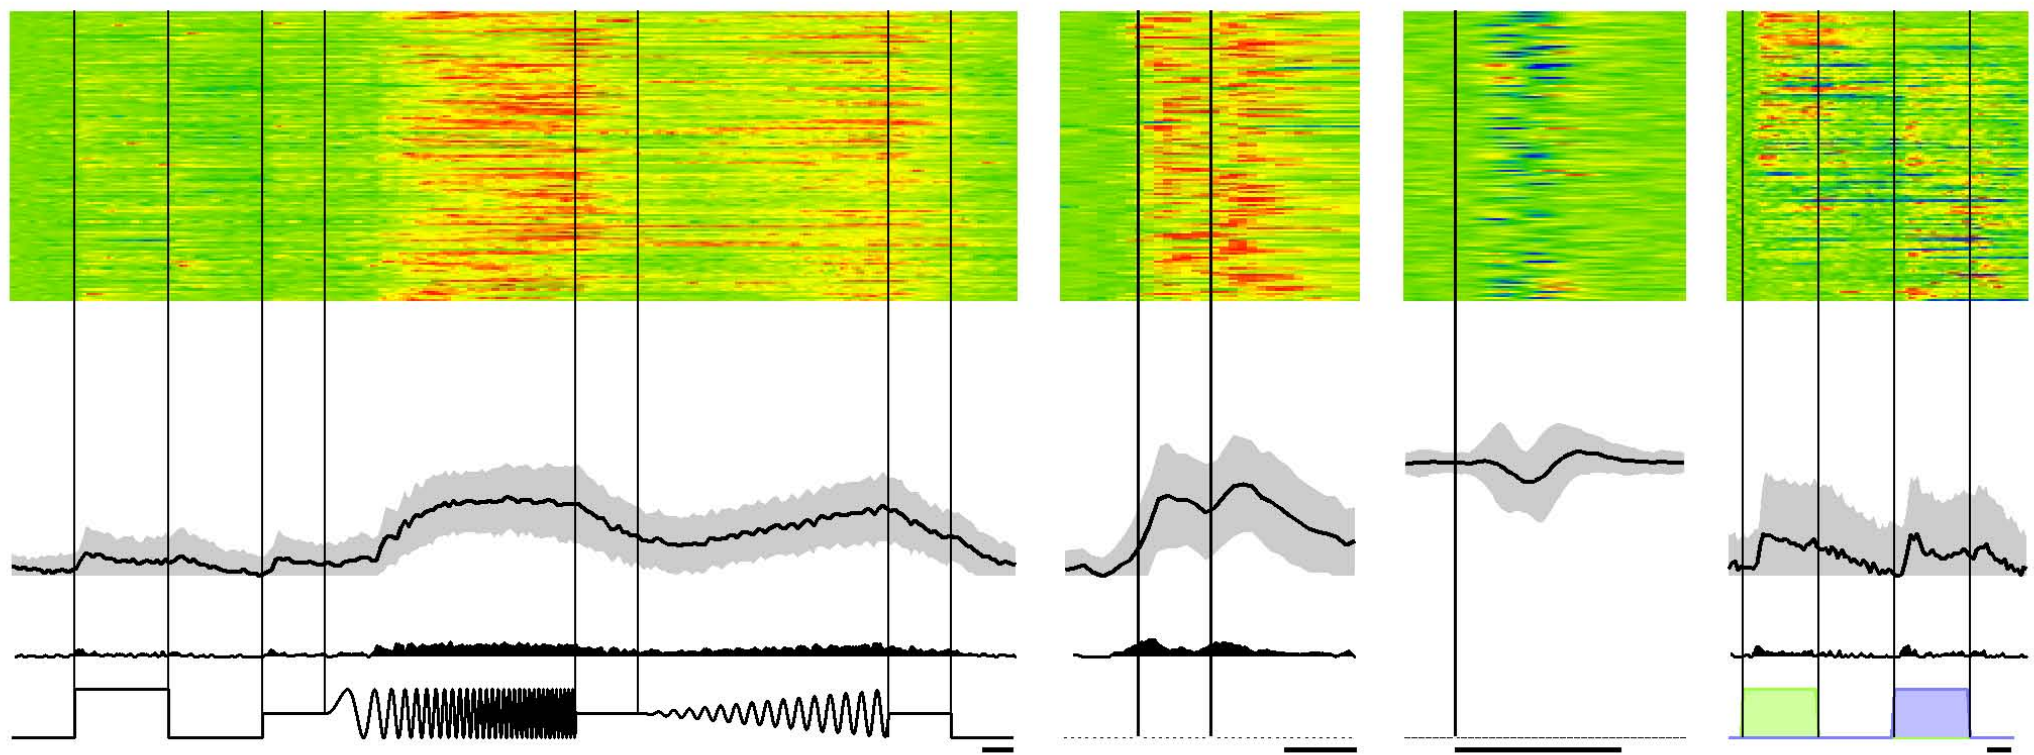

**b**

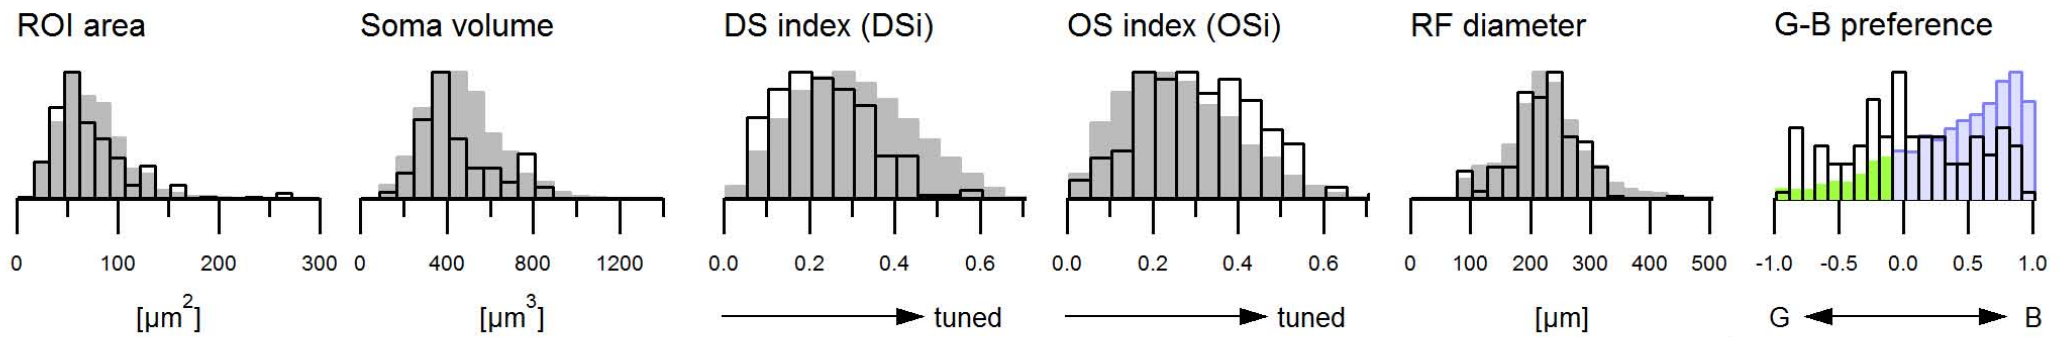

**c**

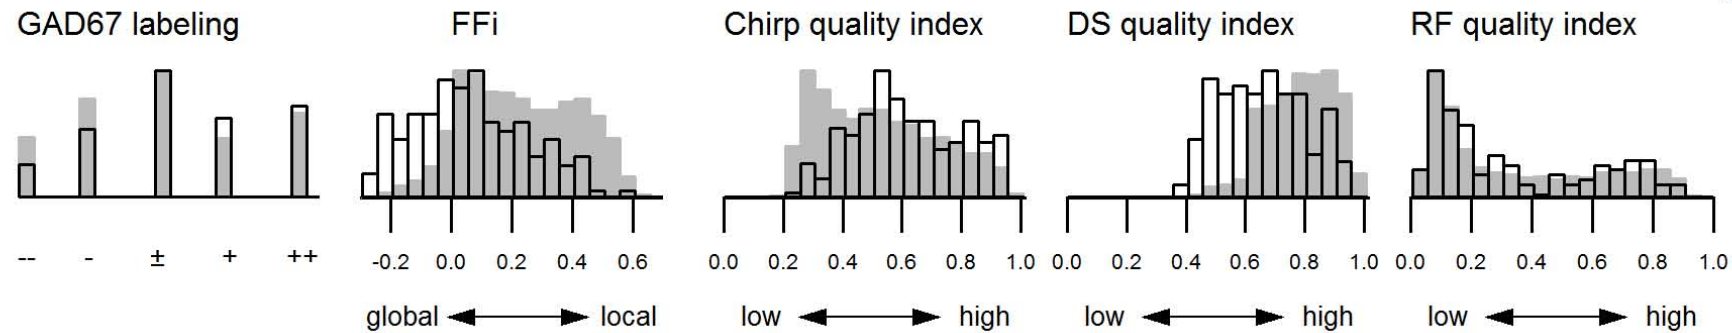

**d**

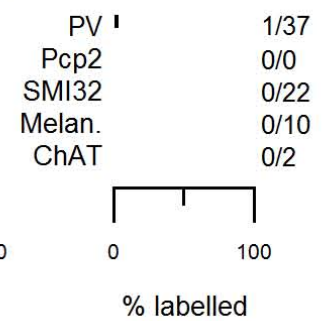

**Group 36** AC ON-OFF high freq.  
137 Cells, 1.72%, (4.63% of ACs); CF: 2.44

SFig. 3-56 a

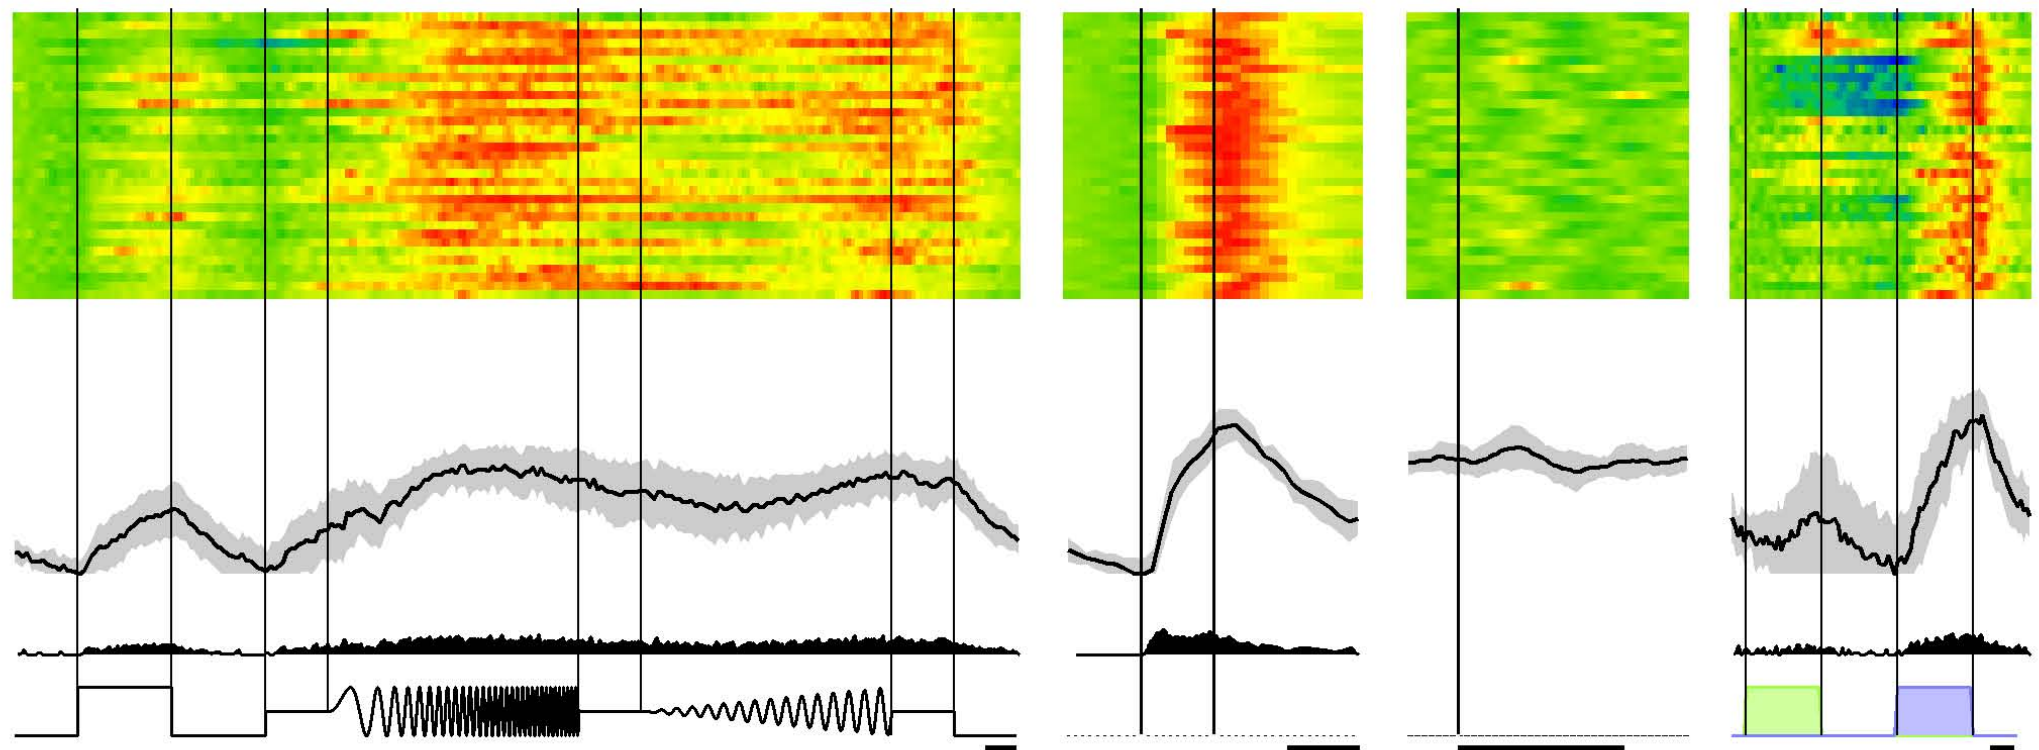

**b**

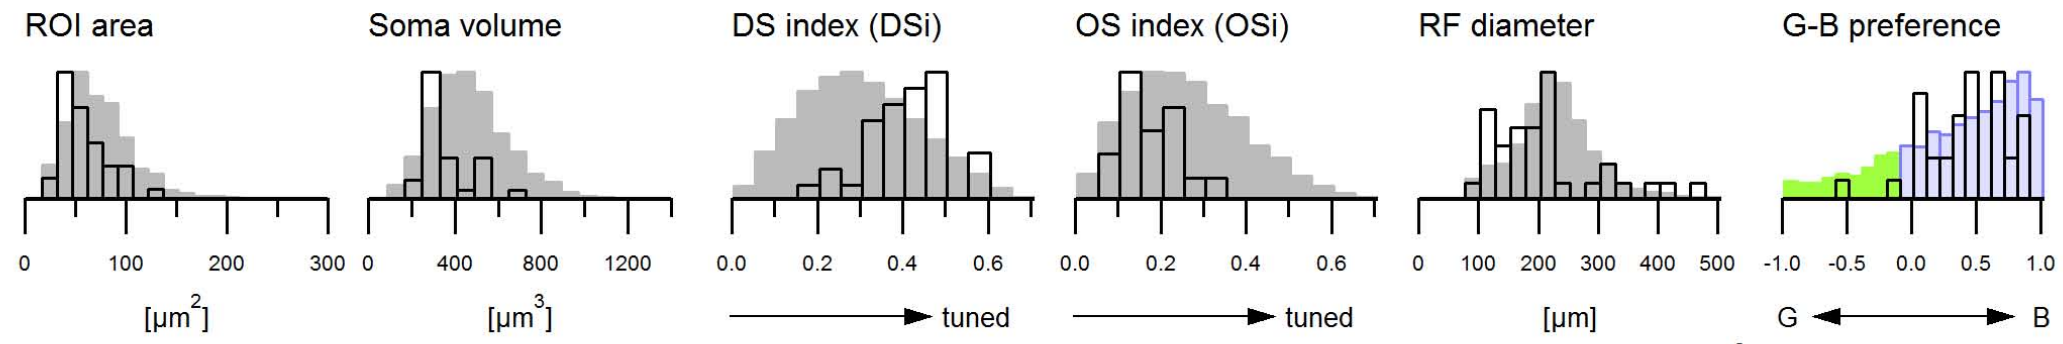

**c**

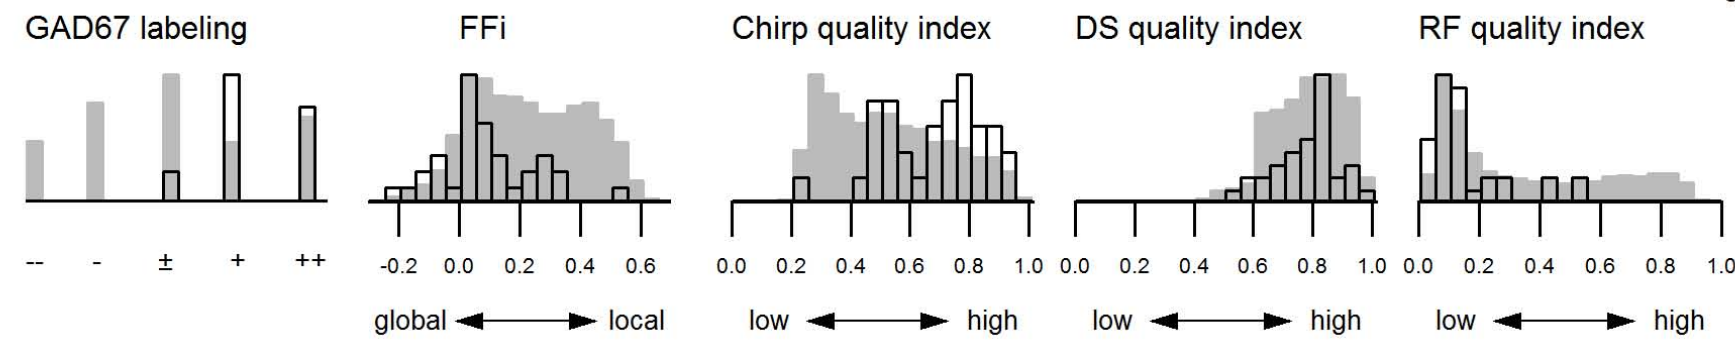

**d**

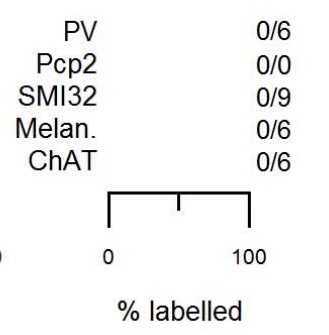

**Group 37** AC ON high freq. sust. 2 (a)  
33 Cells, 0.41%, (1.12% of ACs); CF: 2.75



SFig. 3-57 a

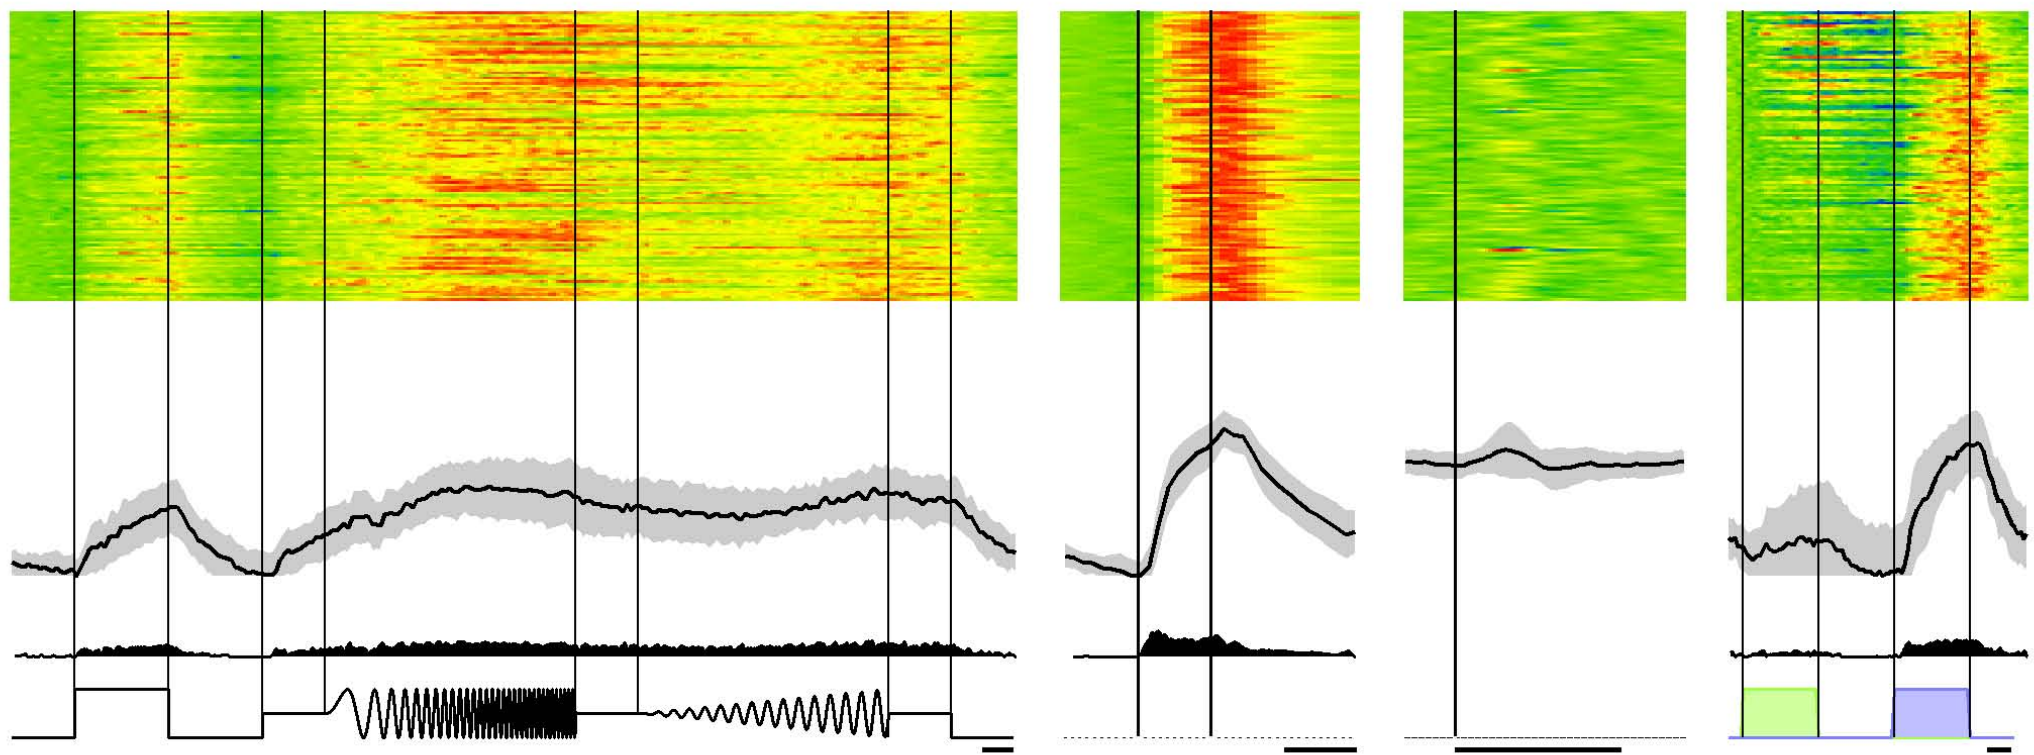

**b**

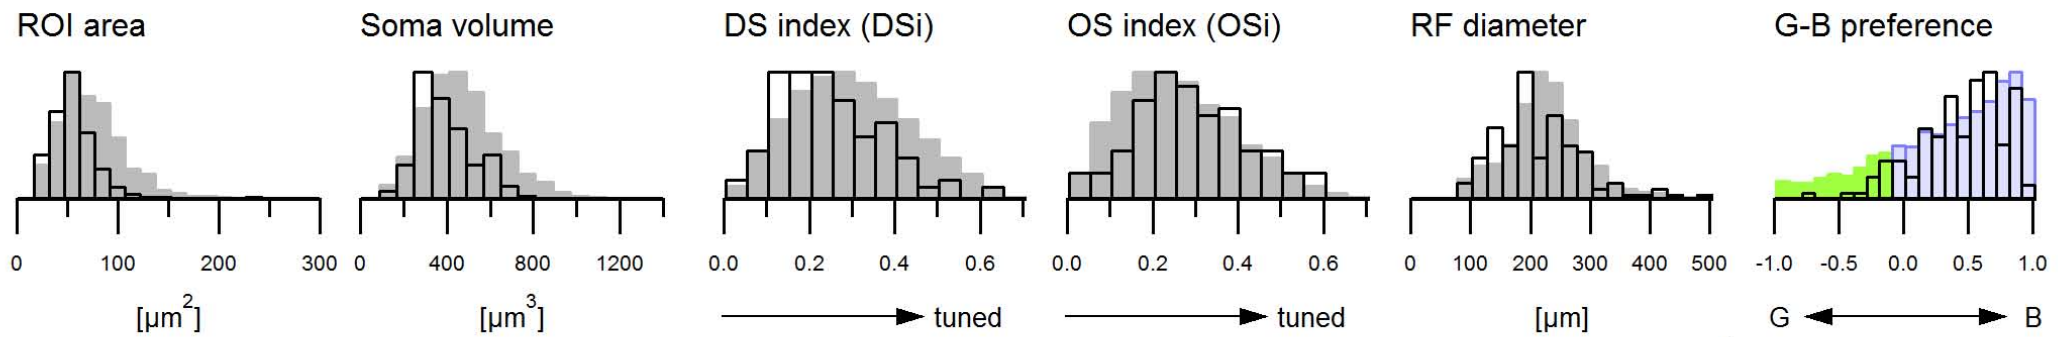

**c**

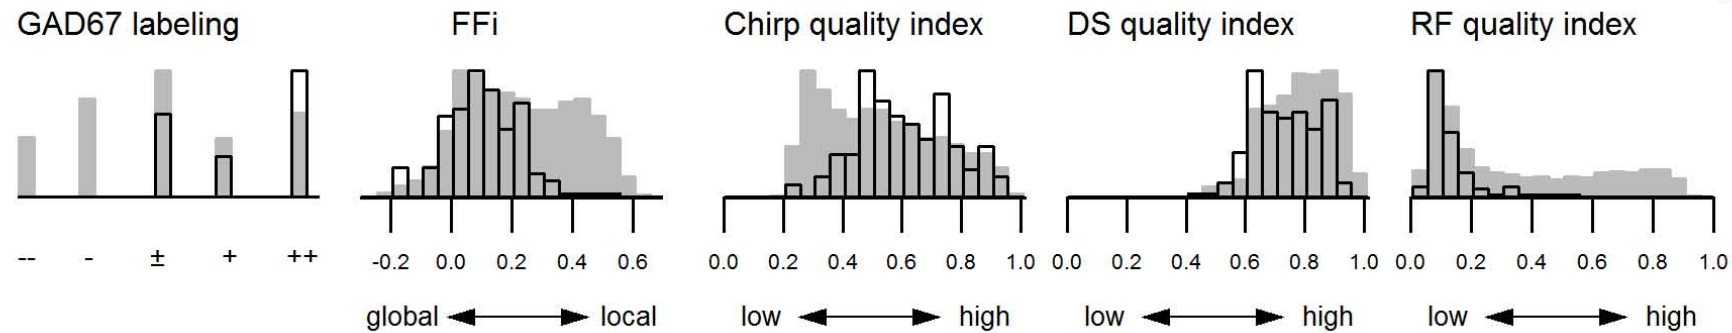

**d**

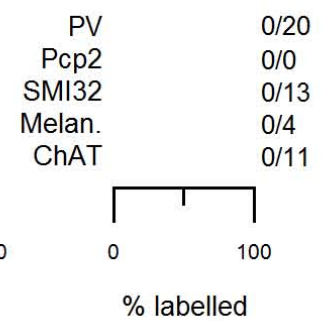

**Group 37** AC ON high freq. sust. 2 (a)  
 111 Cells, 1.39%, (3.75% of ACs); CF: 1.02

SFig. 3-58 a

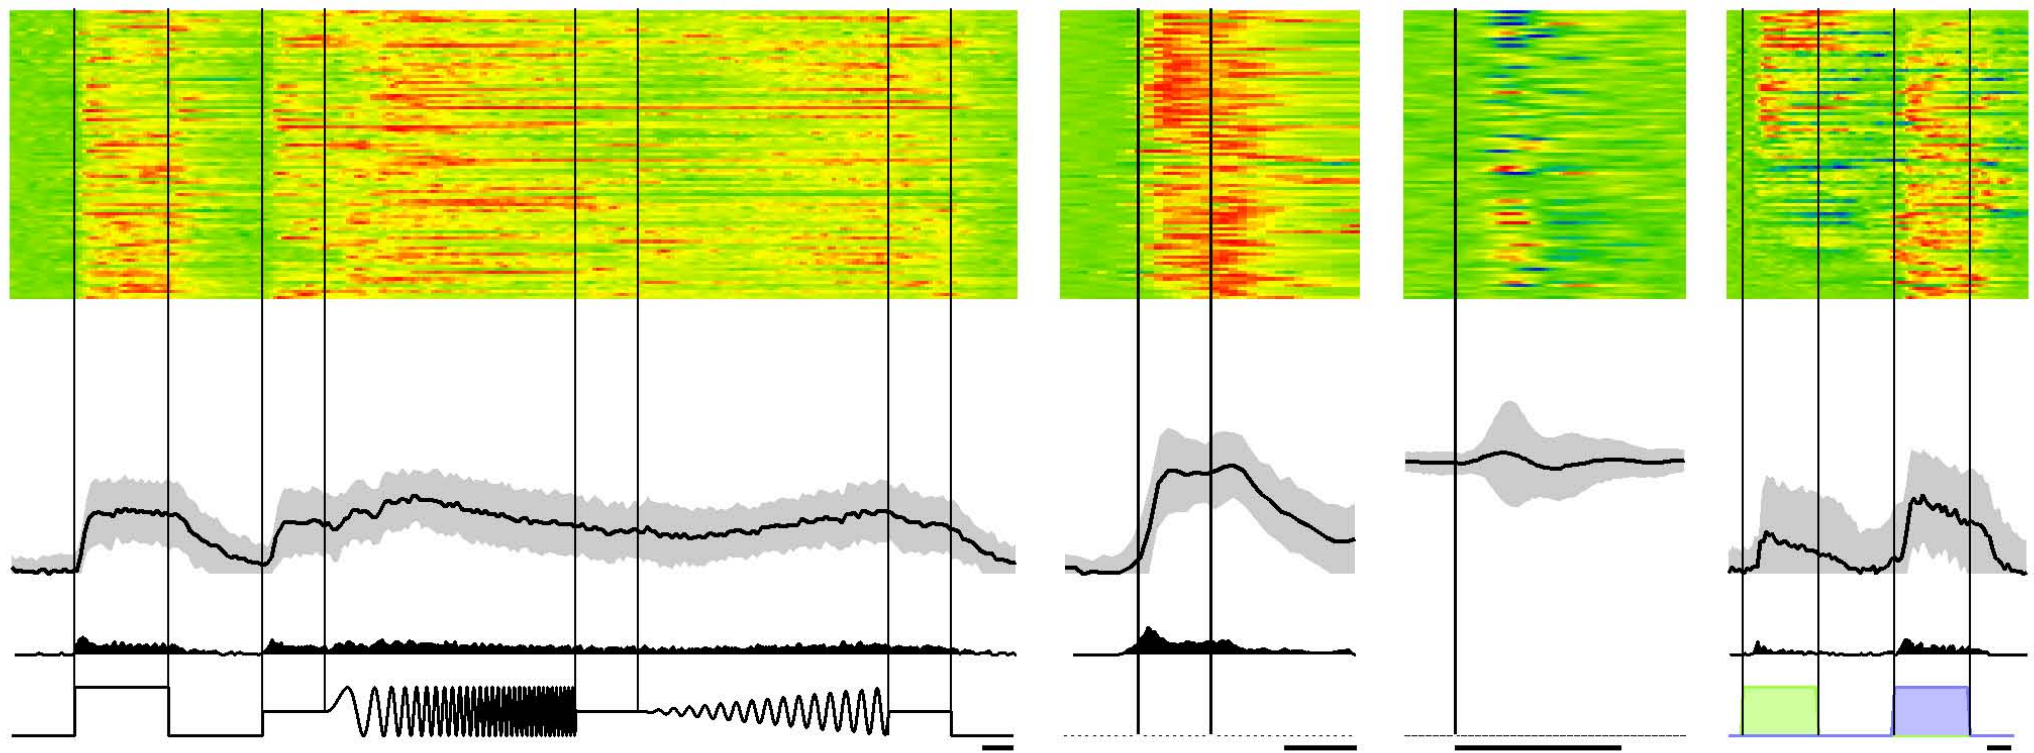

**b**

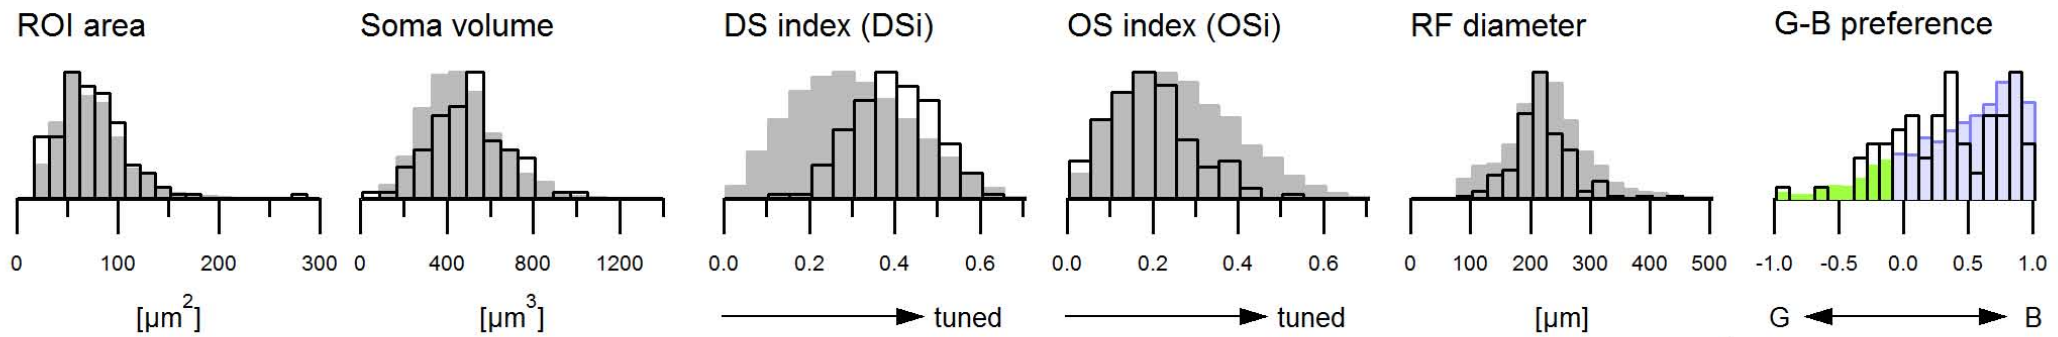

**c**

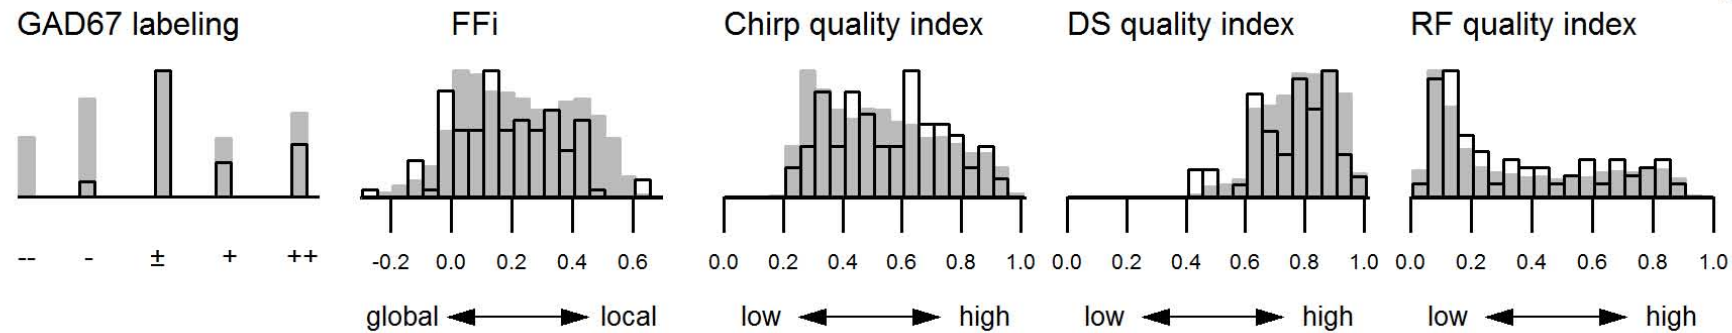

**d**

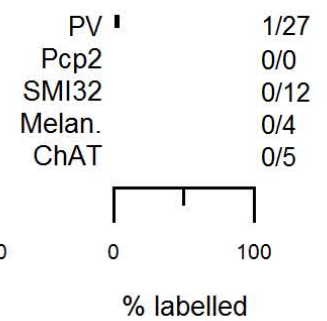

**Group 38 AC ON sust. 1 (a)**

93 Cells, 1.17%, (3.14% of ACs); CF: 0.59



SFig. 3-59 a

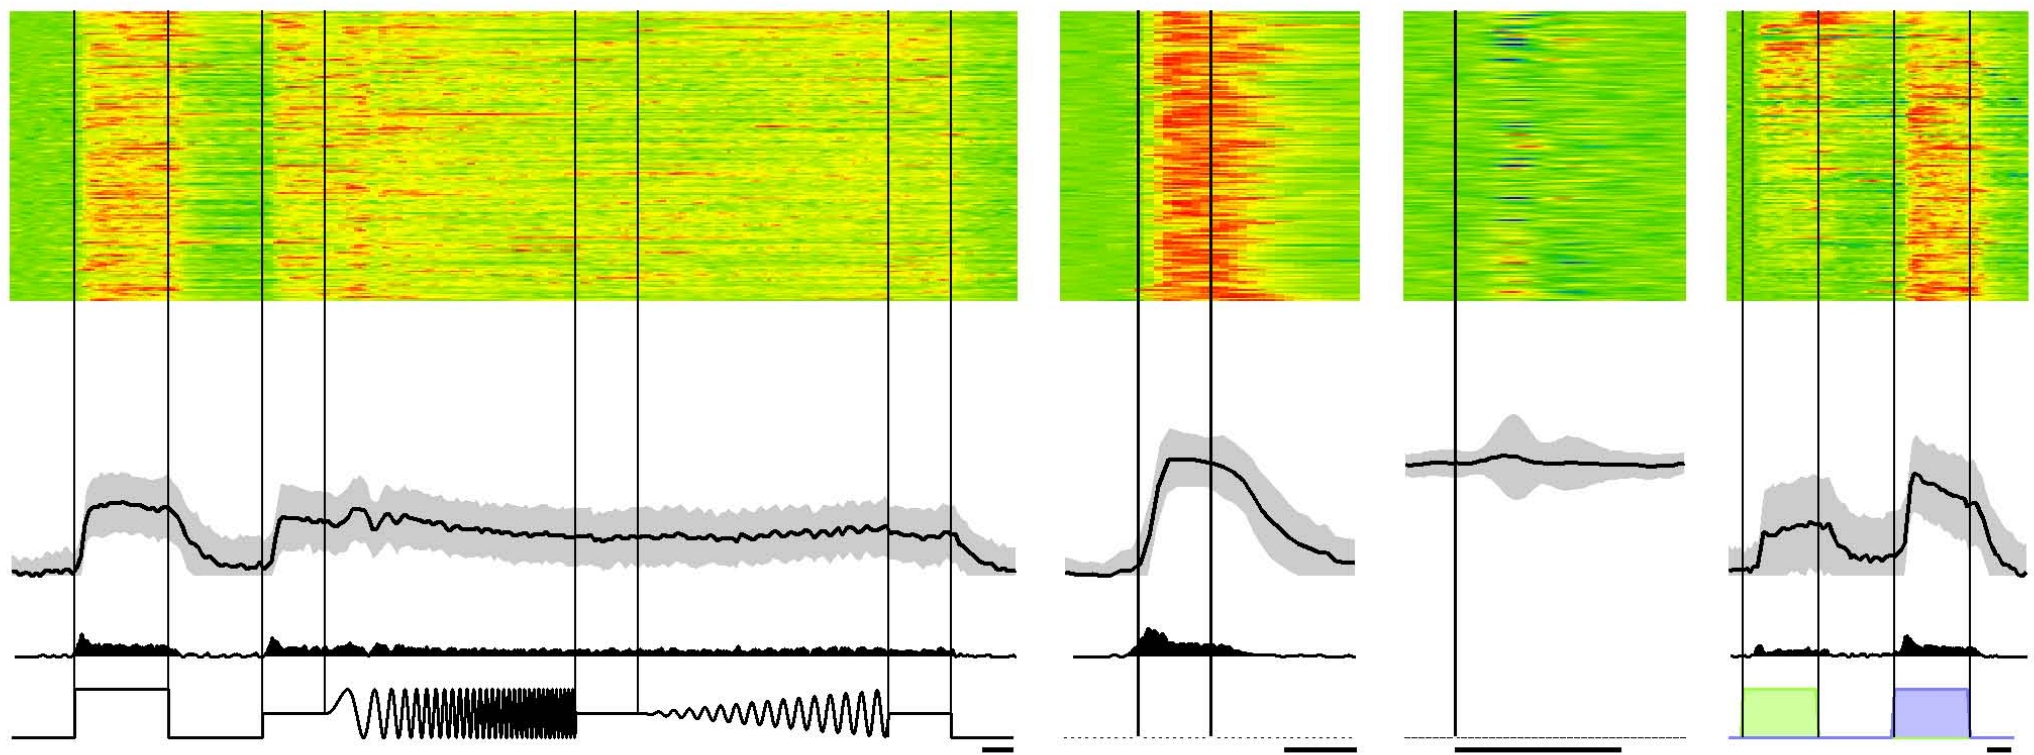

**b**

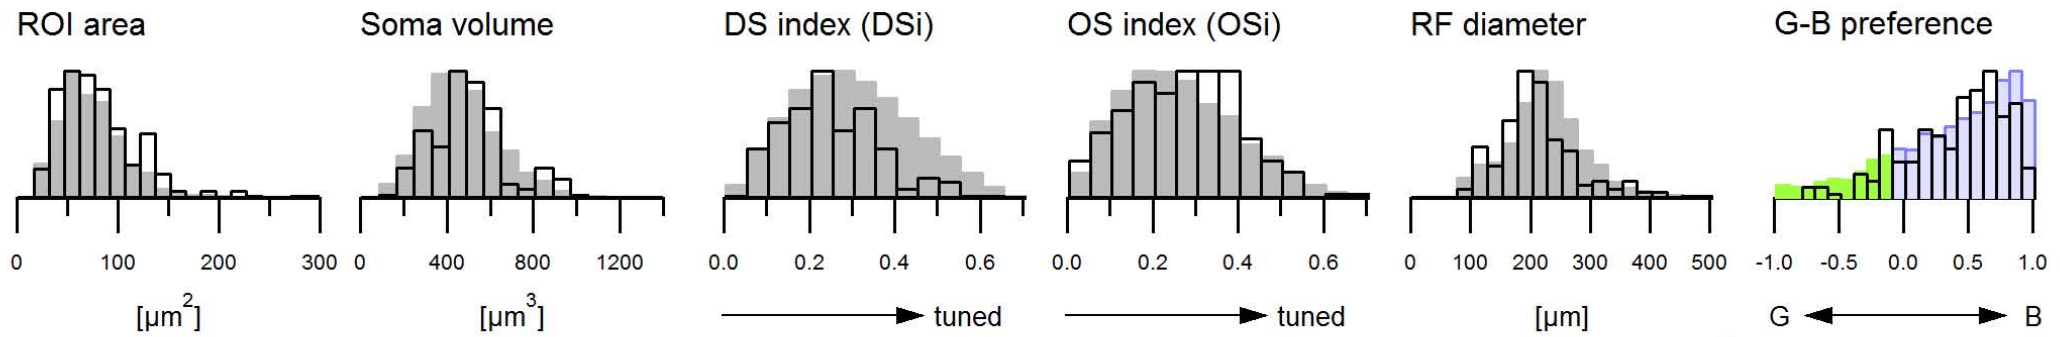

**c**

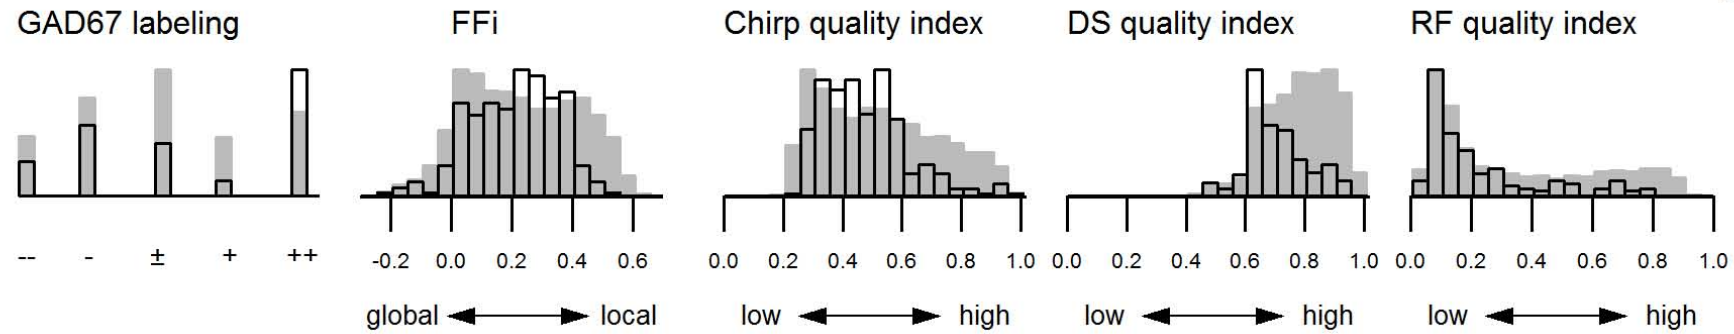

**d**

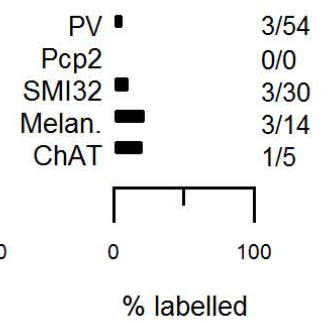

**Group 38 AC ON sust. 1 (b)**  
 170 Cells, 2.13%, (5.75% of ACs); CF: 2.03

SFig. 3-60 a

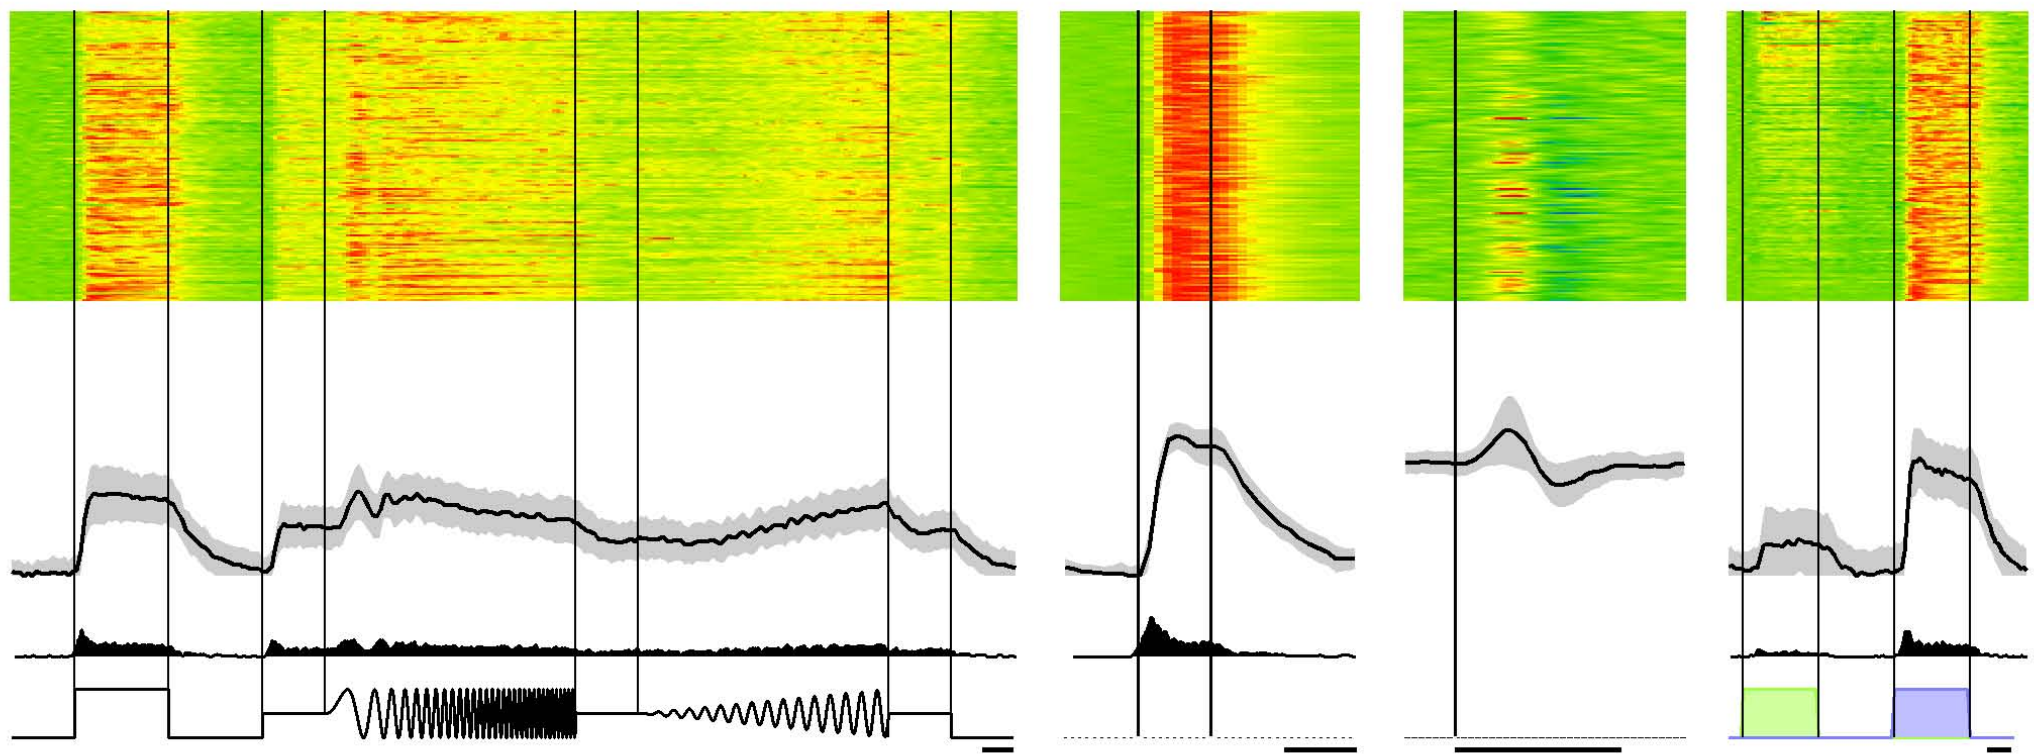

**b**

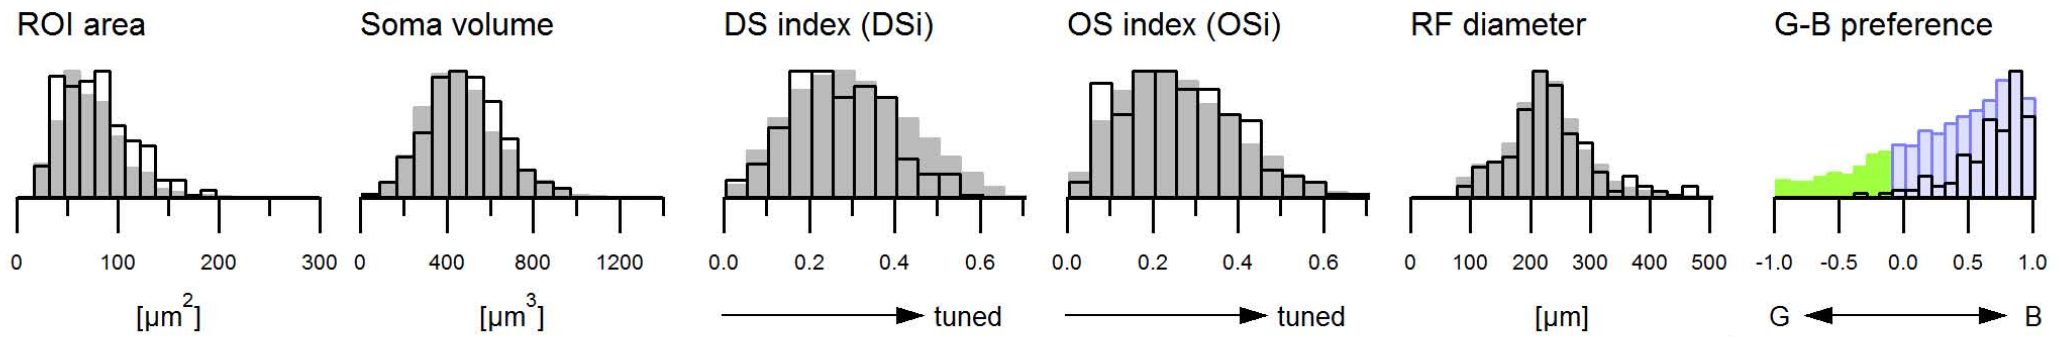

**c**

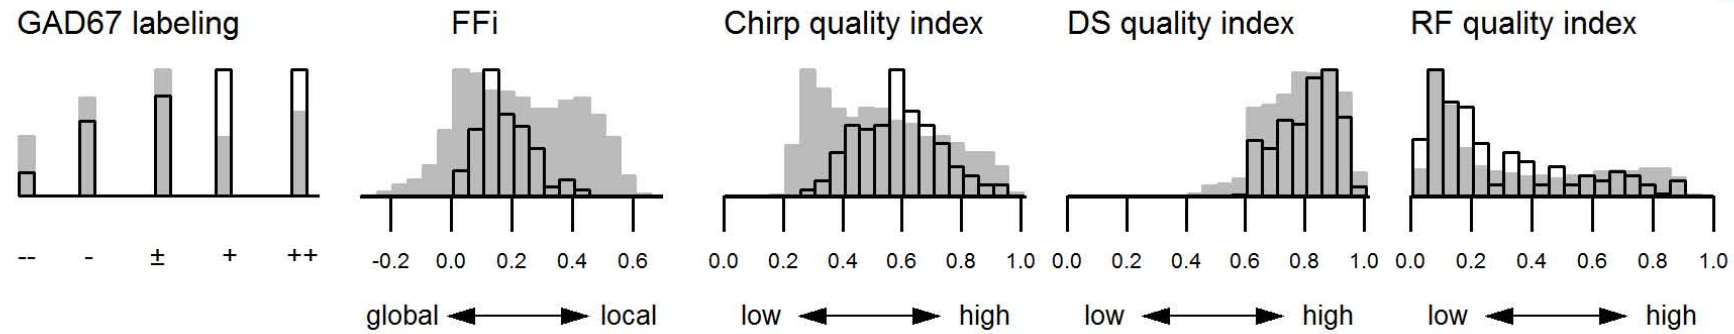

**d**

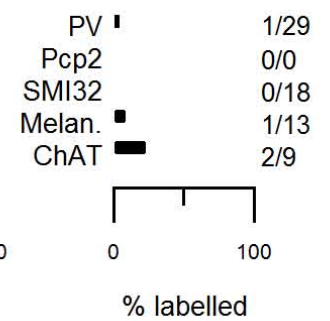

**Group 38** AC ON sust. 1 (c)

156 Cells, 1.95%, (5.27% of ACs); CF: 1.41



SFig. 3-61 a

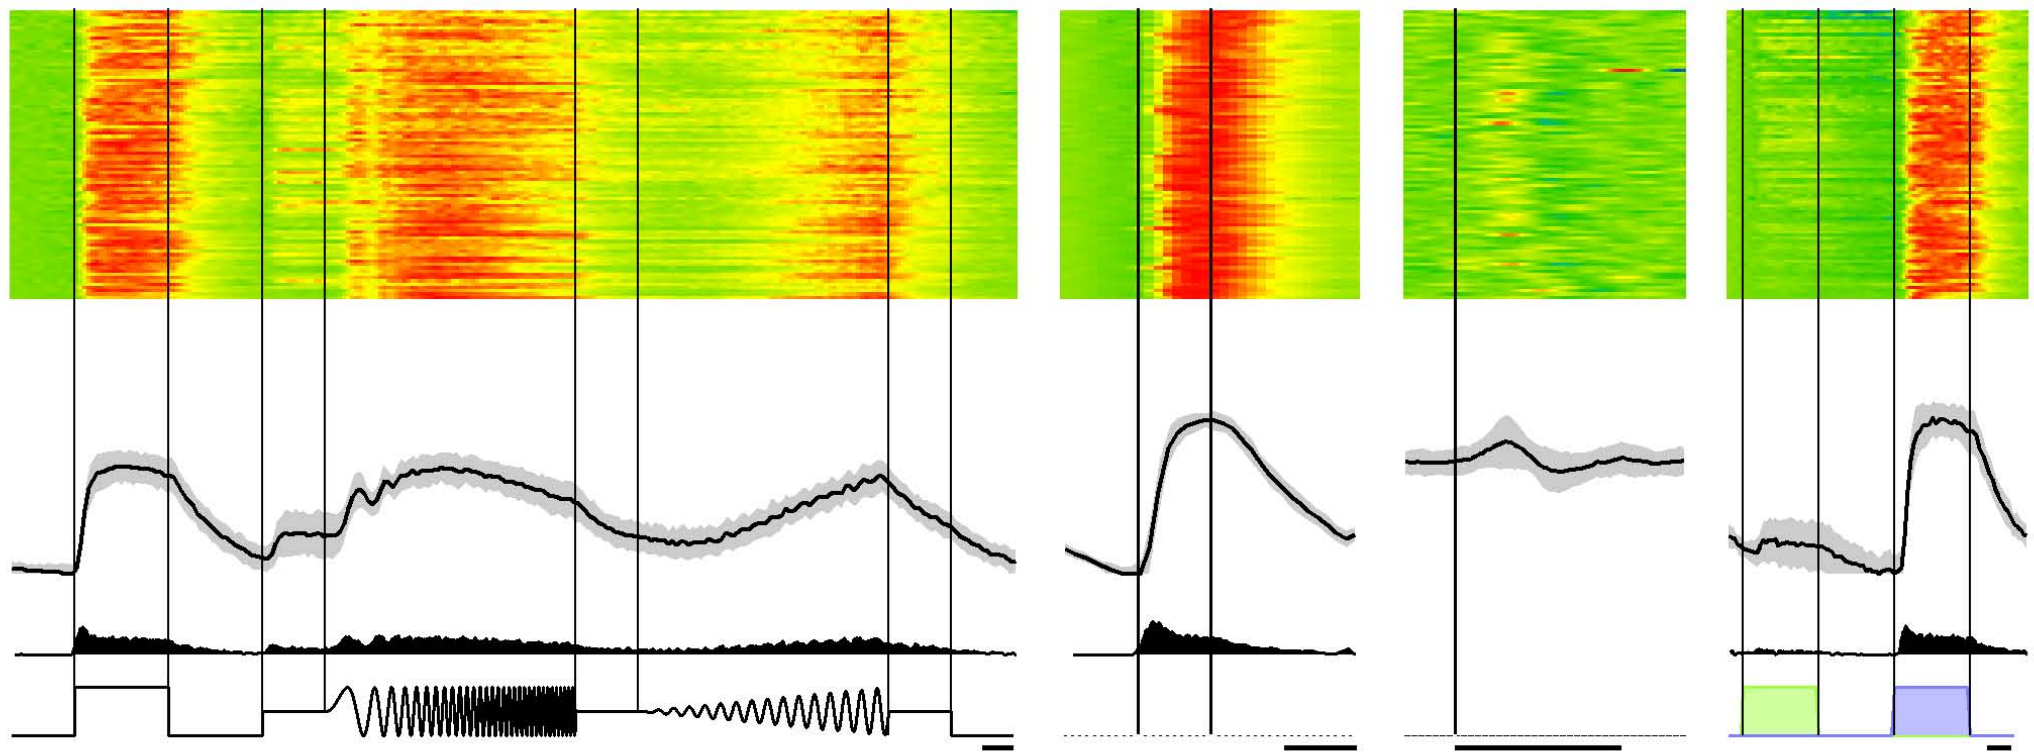

**b**

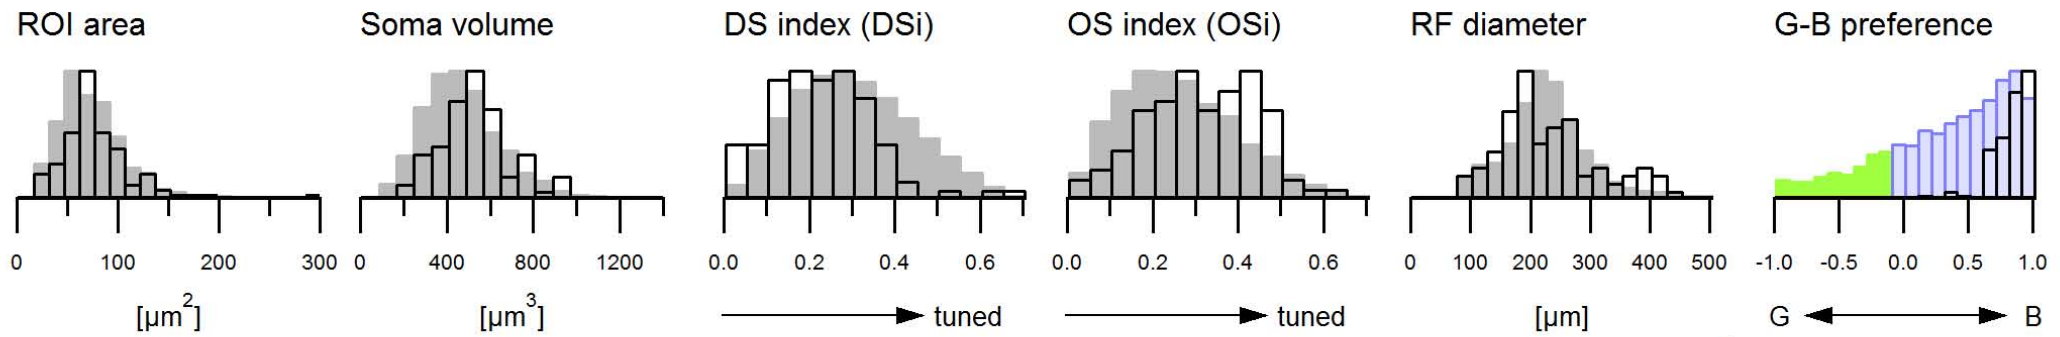

**c**

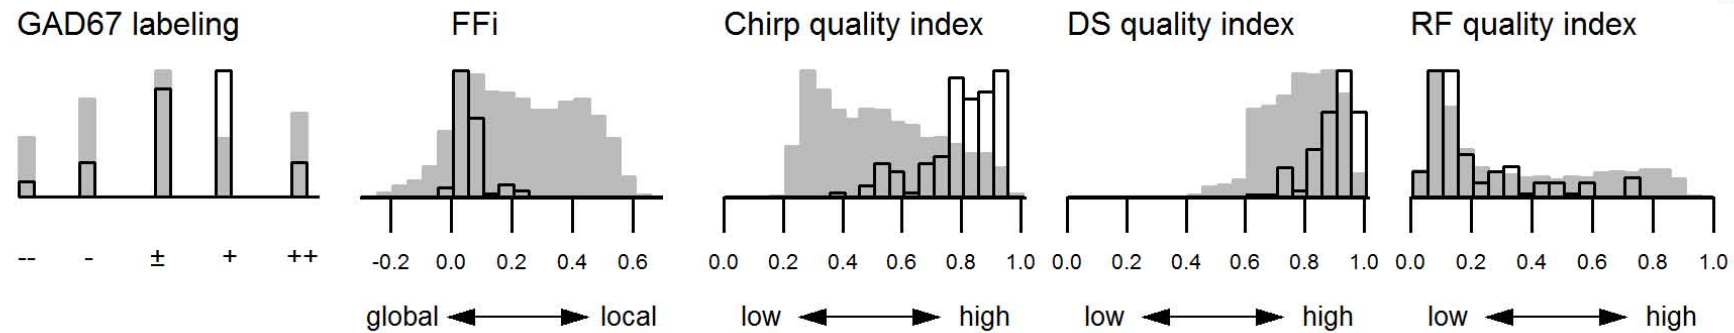

**d**

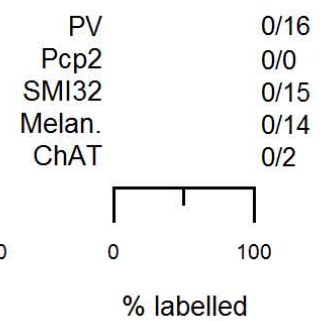

**Group 39 AC ON sust. 2**

88 Cells, 1.1%, (2.97% of ACs); CF: 2.86

SFig. 3-62 a

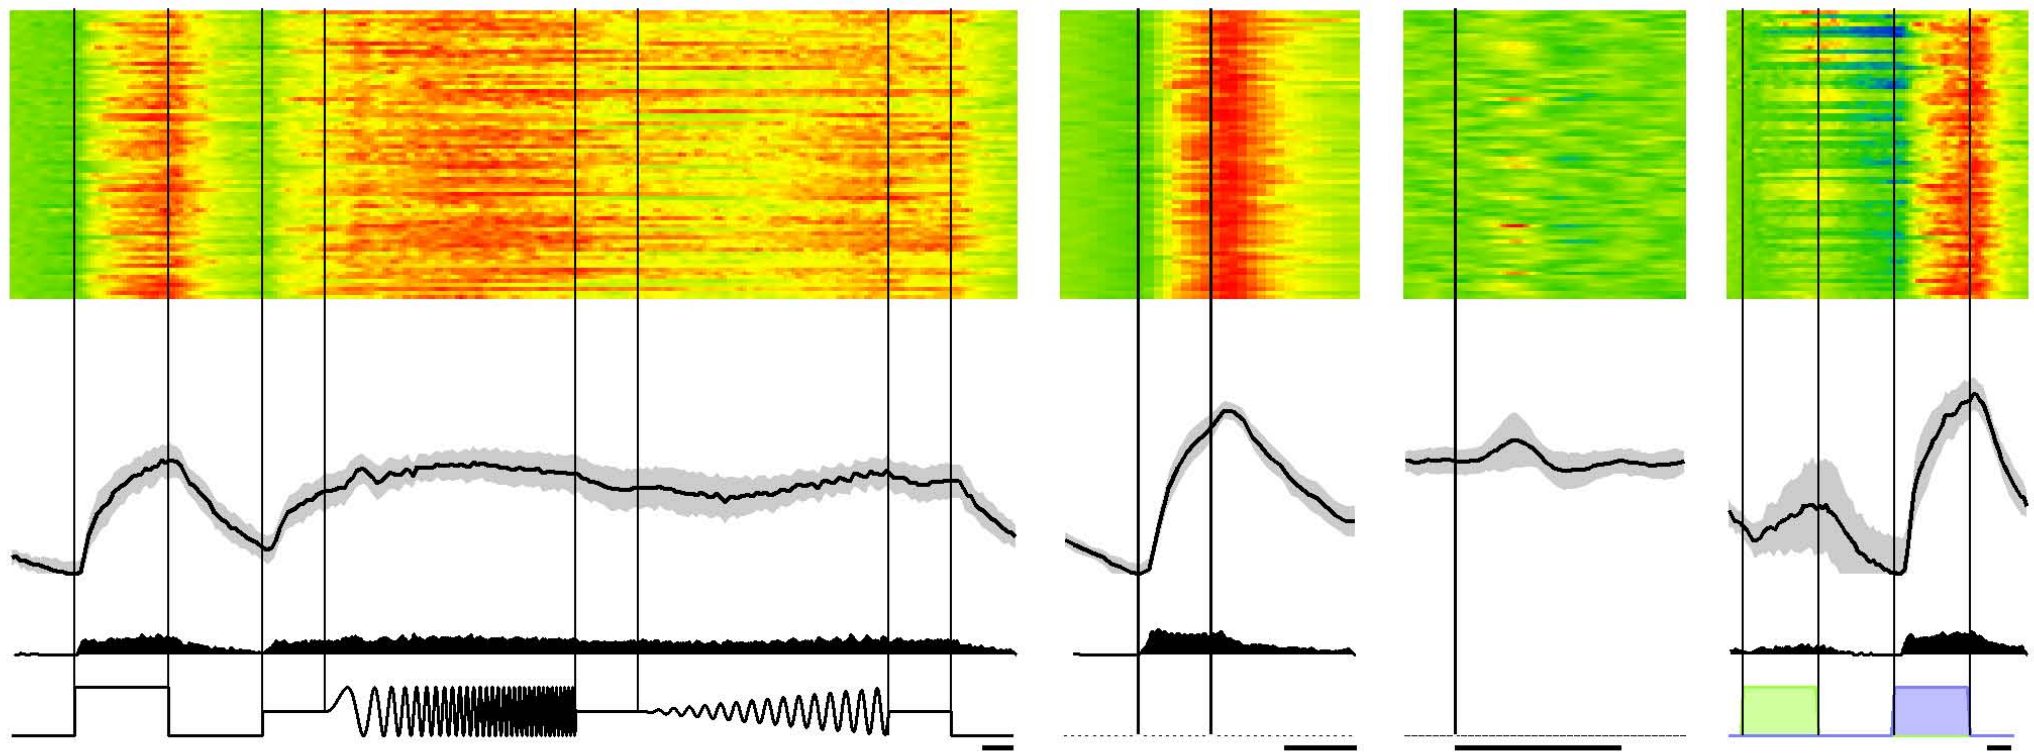

**b**

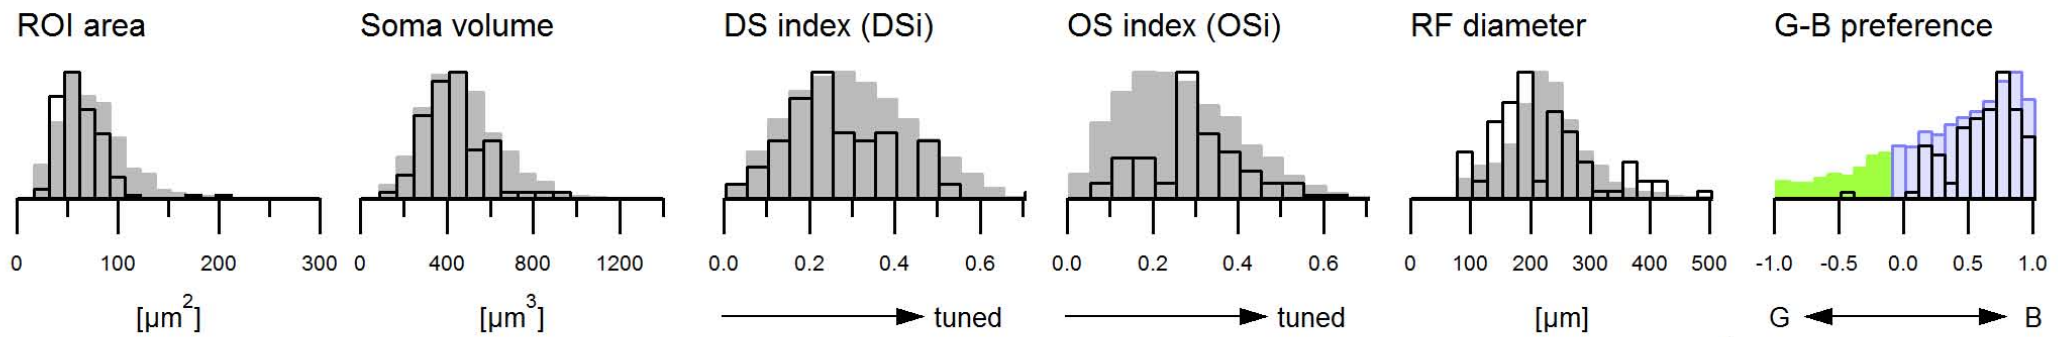

**c**

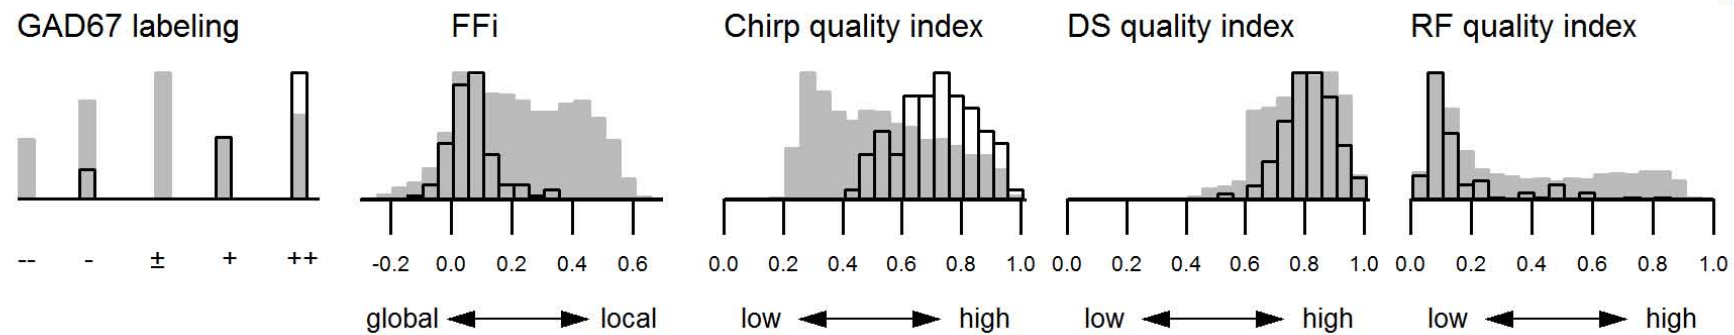

**d**

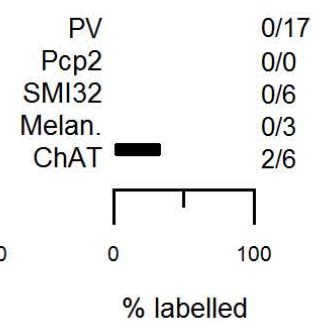

**Group 40 AC ON sust. 3 (a)**

73 Cells, 0.91%, (2.47% of ACs); CF: 2.94



SFig. 3-63 a

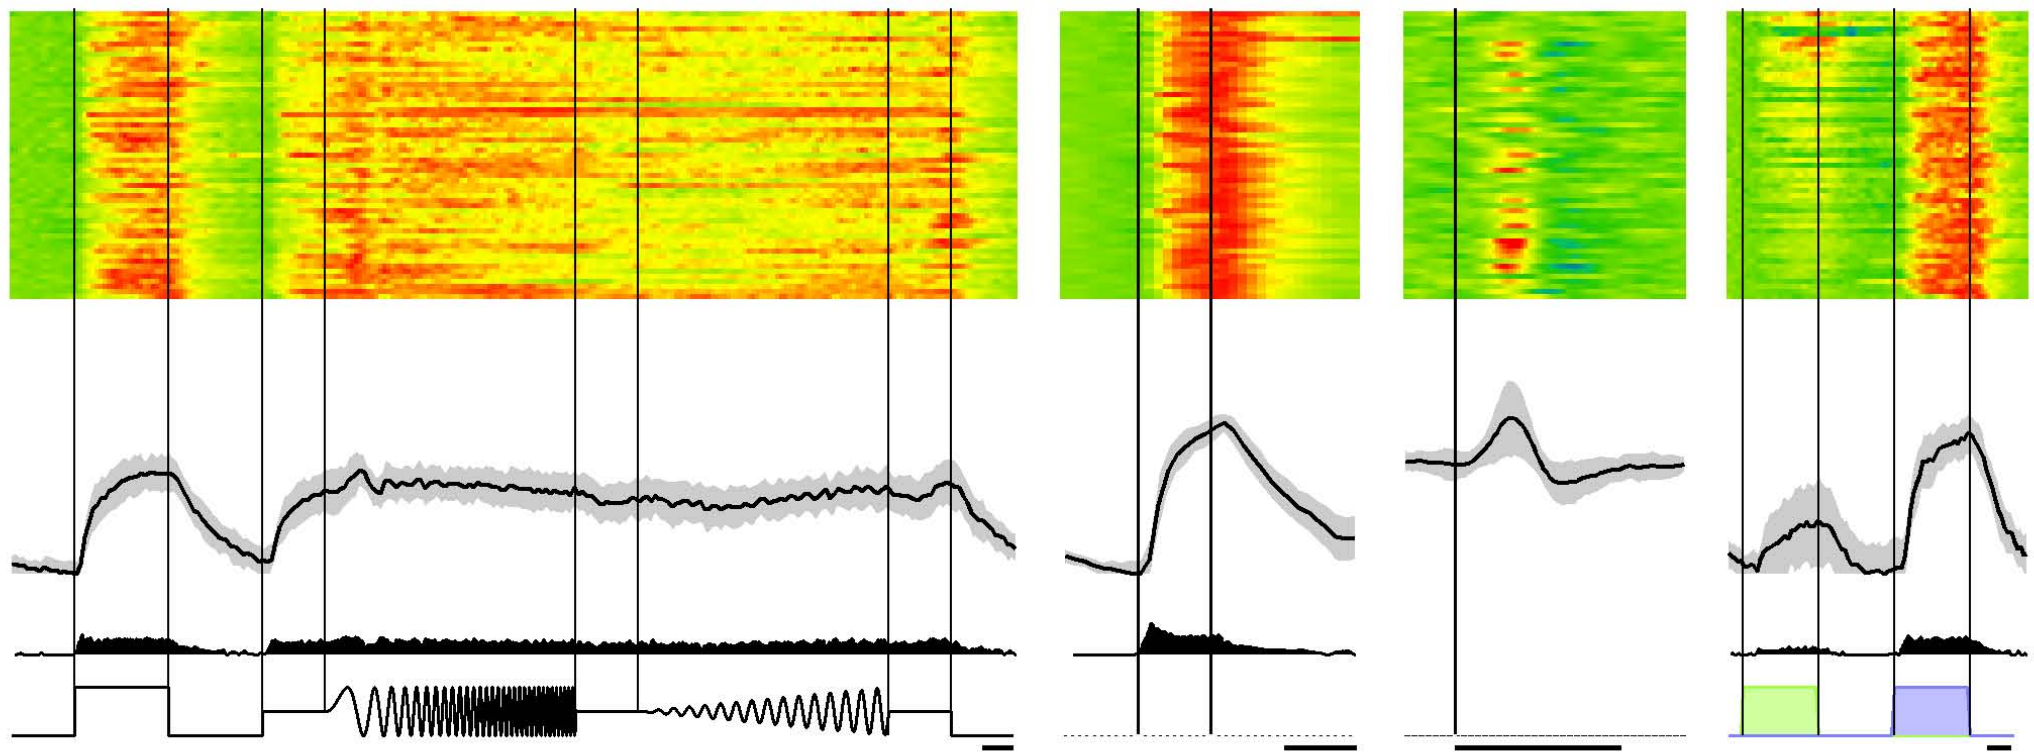

**b**

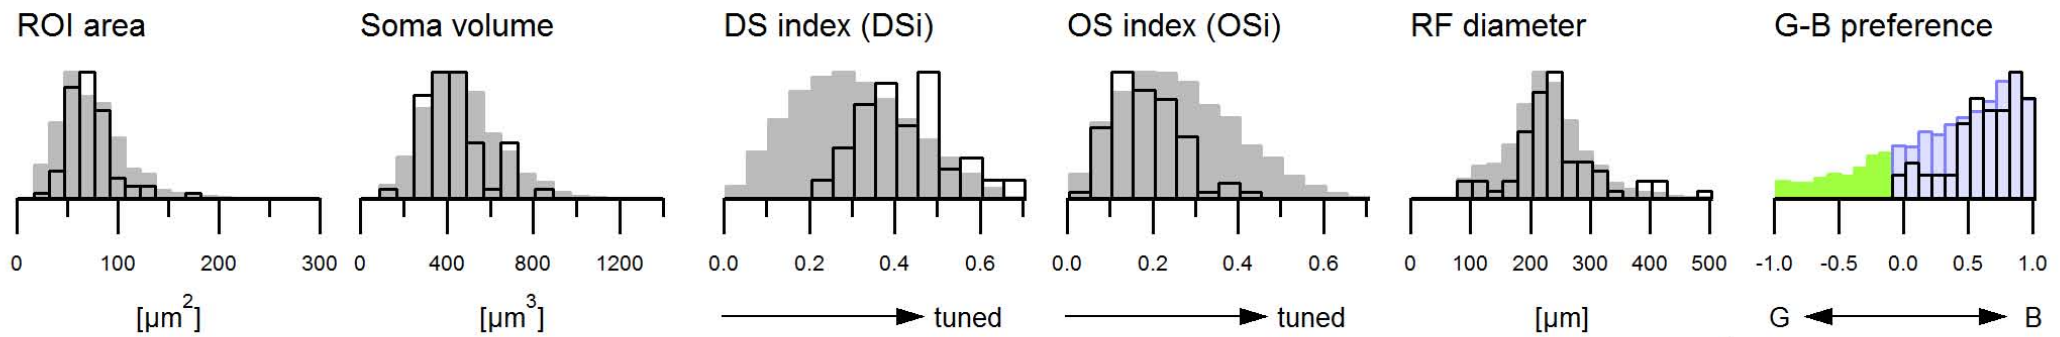

**c**

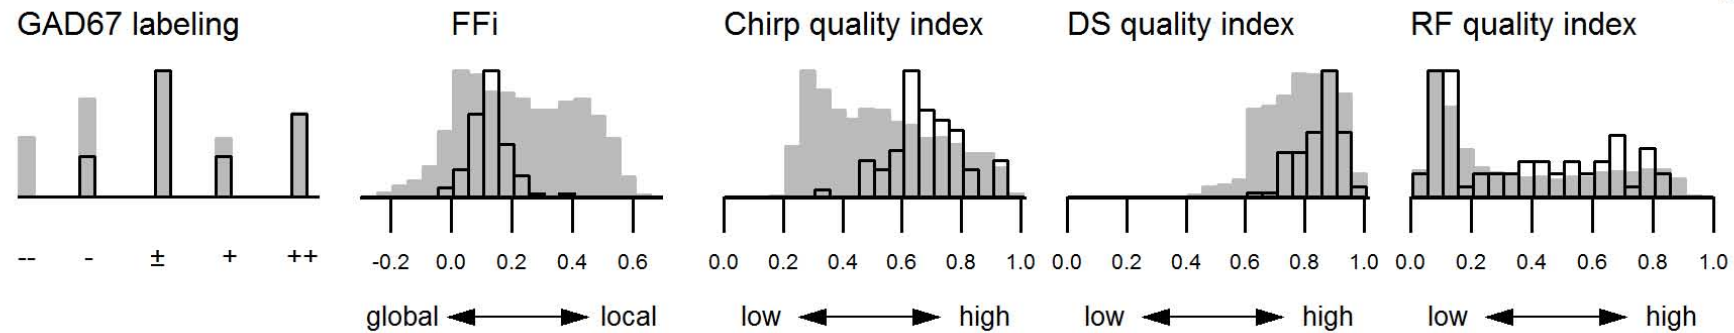

**d**

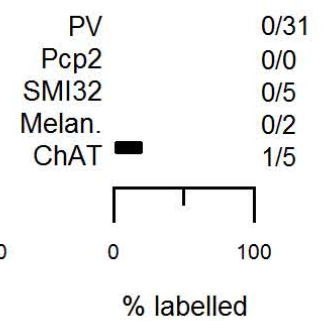

**Group 40 AC ON sust. 3 (b)**  
57 Cells, 0.71%, (1.93% of ACs); CF: 2.59

SFig. 3-64 a

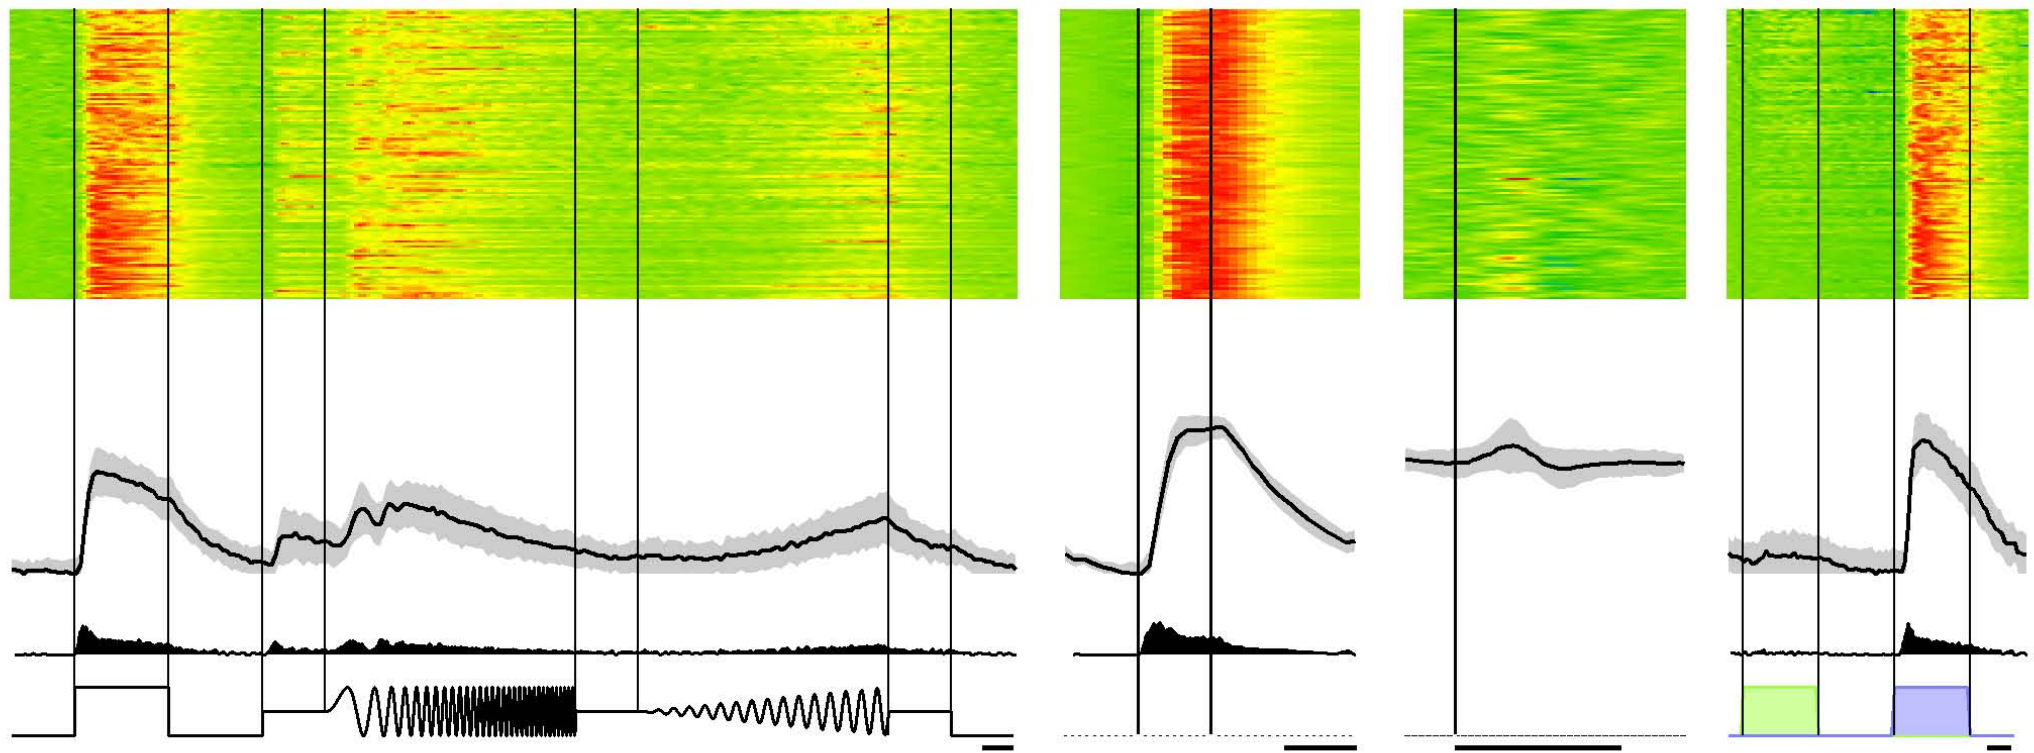

**b**

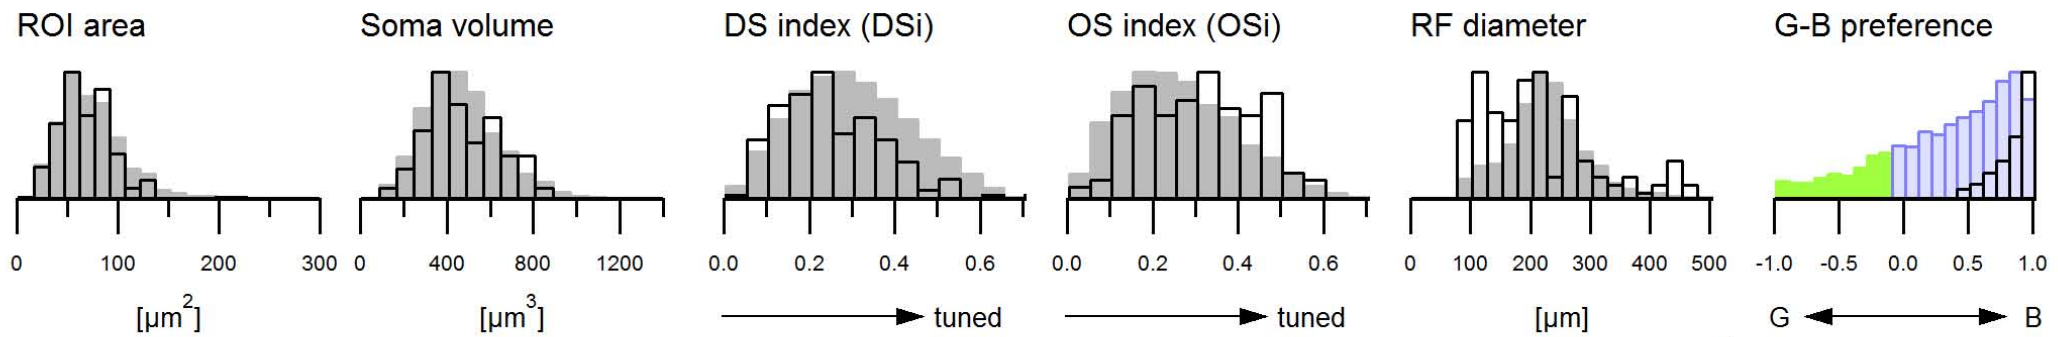

**c**

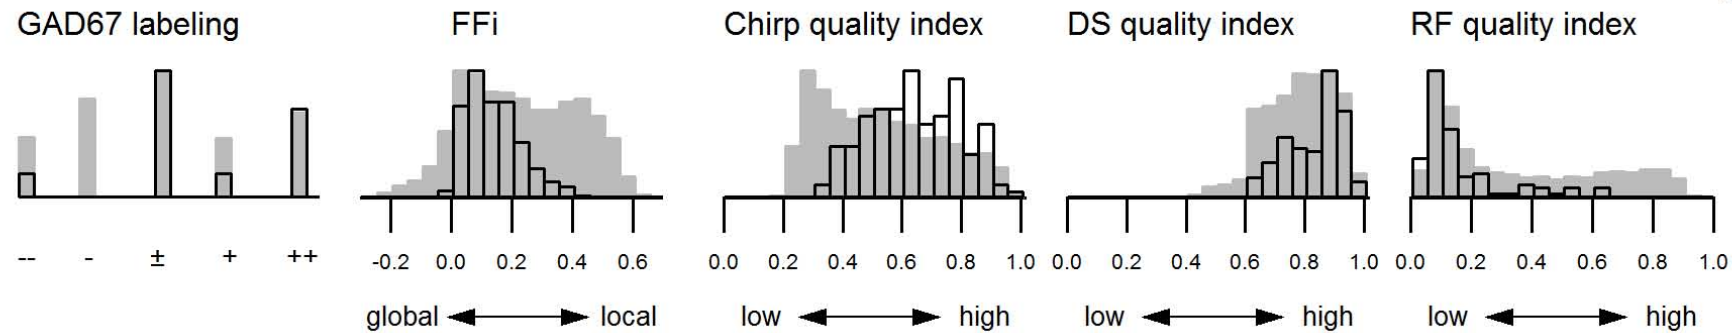

**d**

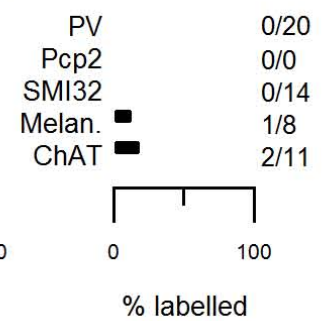

**Group 41 AC ON sust. 4**

124 Cells, 1.55%, (4.19% of ACs); CF: 2.66



SFig. 3-65 a

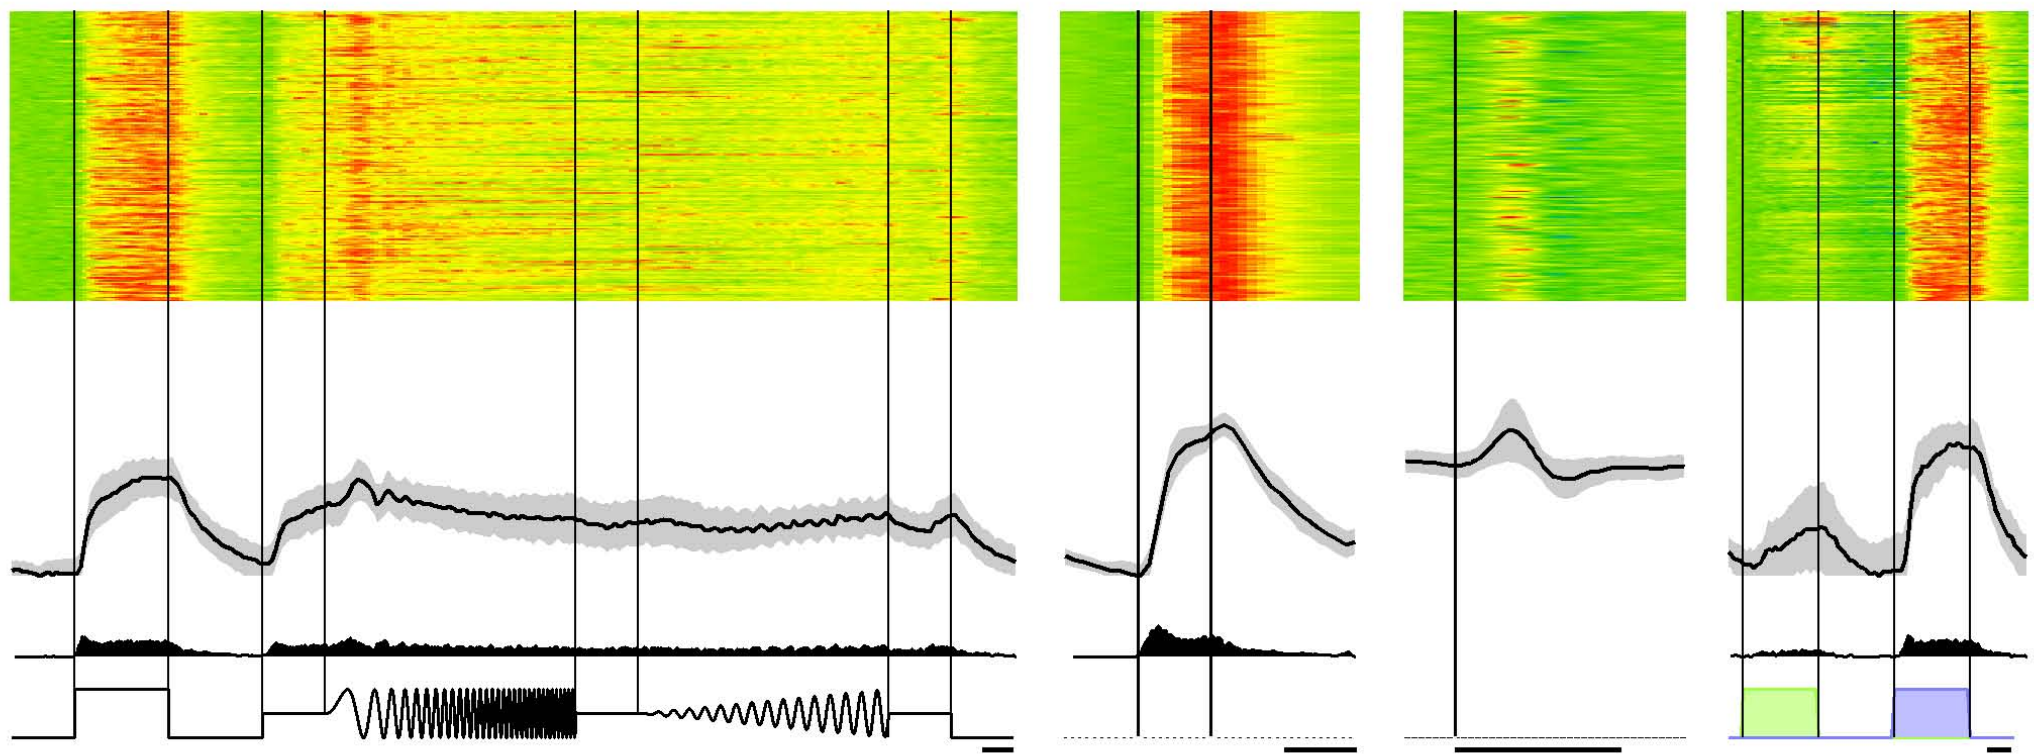

**b**

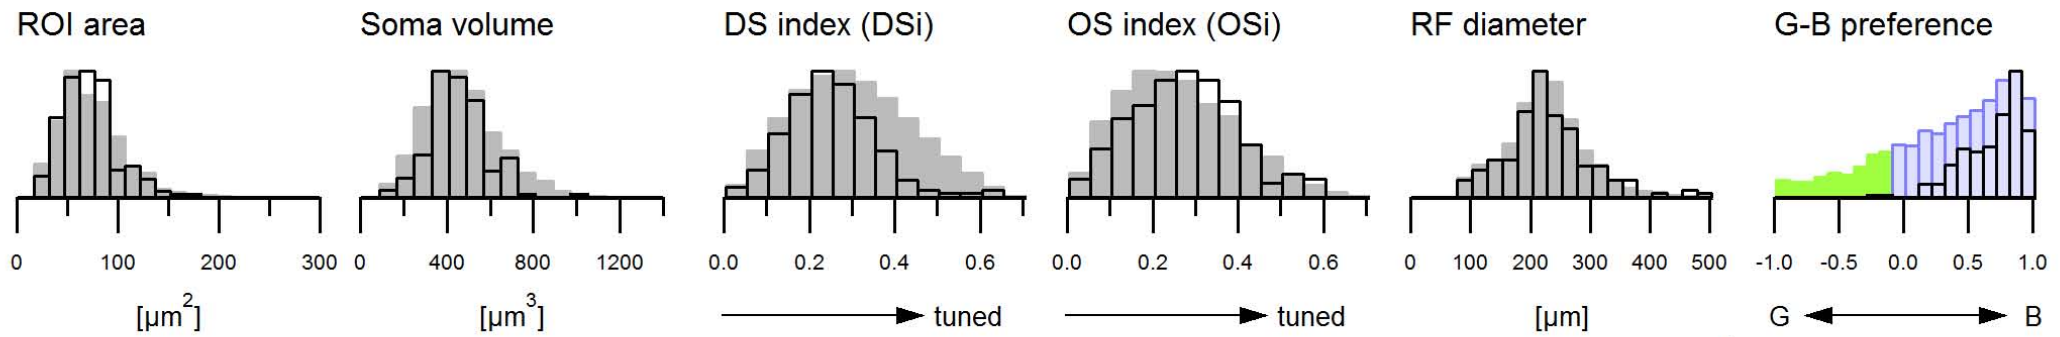

**c**

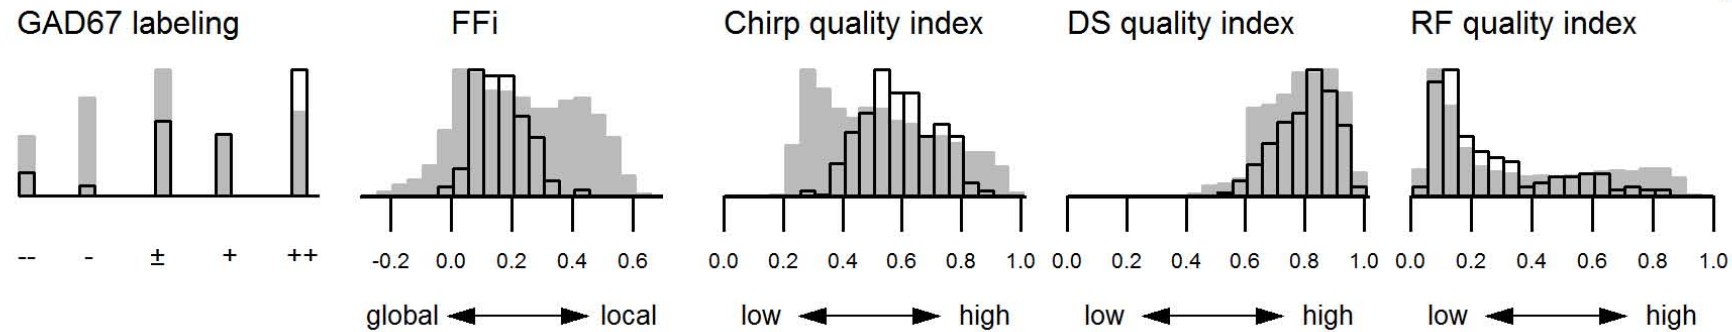

**d**

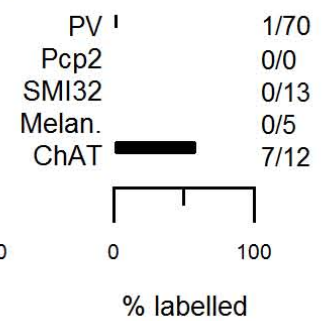

**Group 42 AC ON starburst (a)**

195 Cells, 2.44%, (6.59% of ACs); CF: 2.05

SFig. 3-66 a

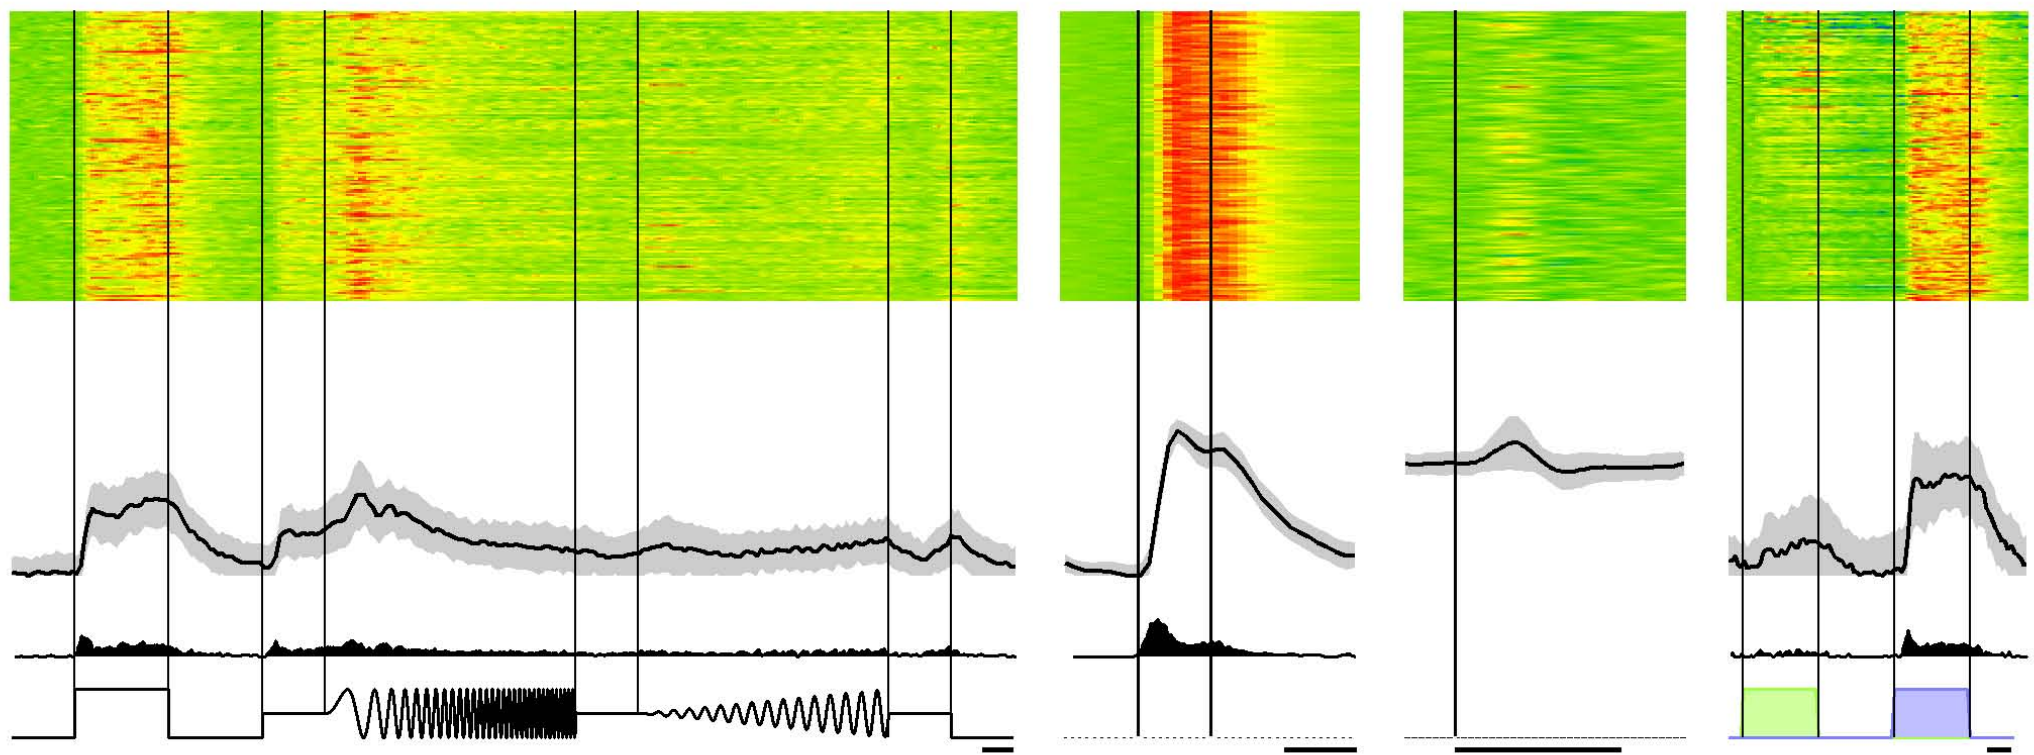

**b**

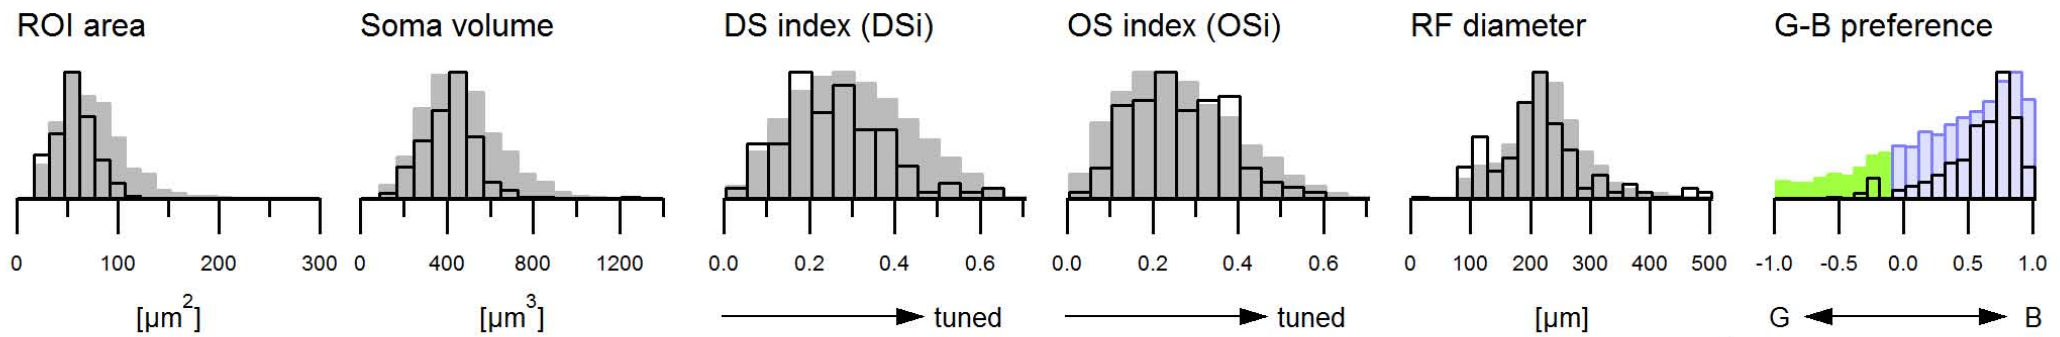

**c**

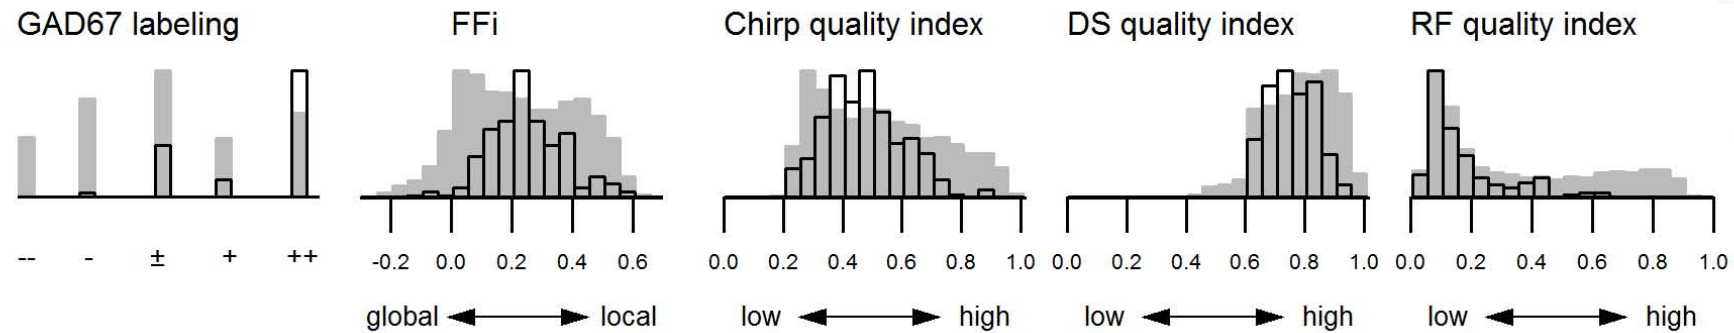

**d**

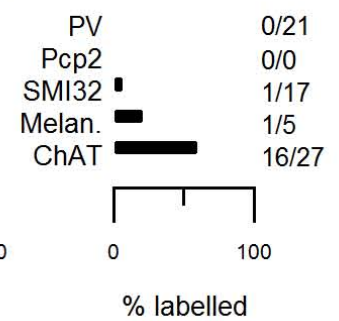

**Group 42 AC ON starburst (b)**

155 Cells, 1.94%, (5.24% of ACs); CF: 3.64



SFig. 3-67 a

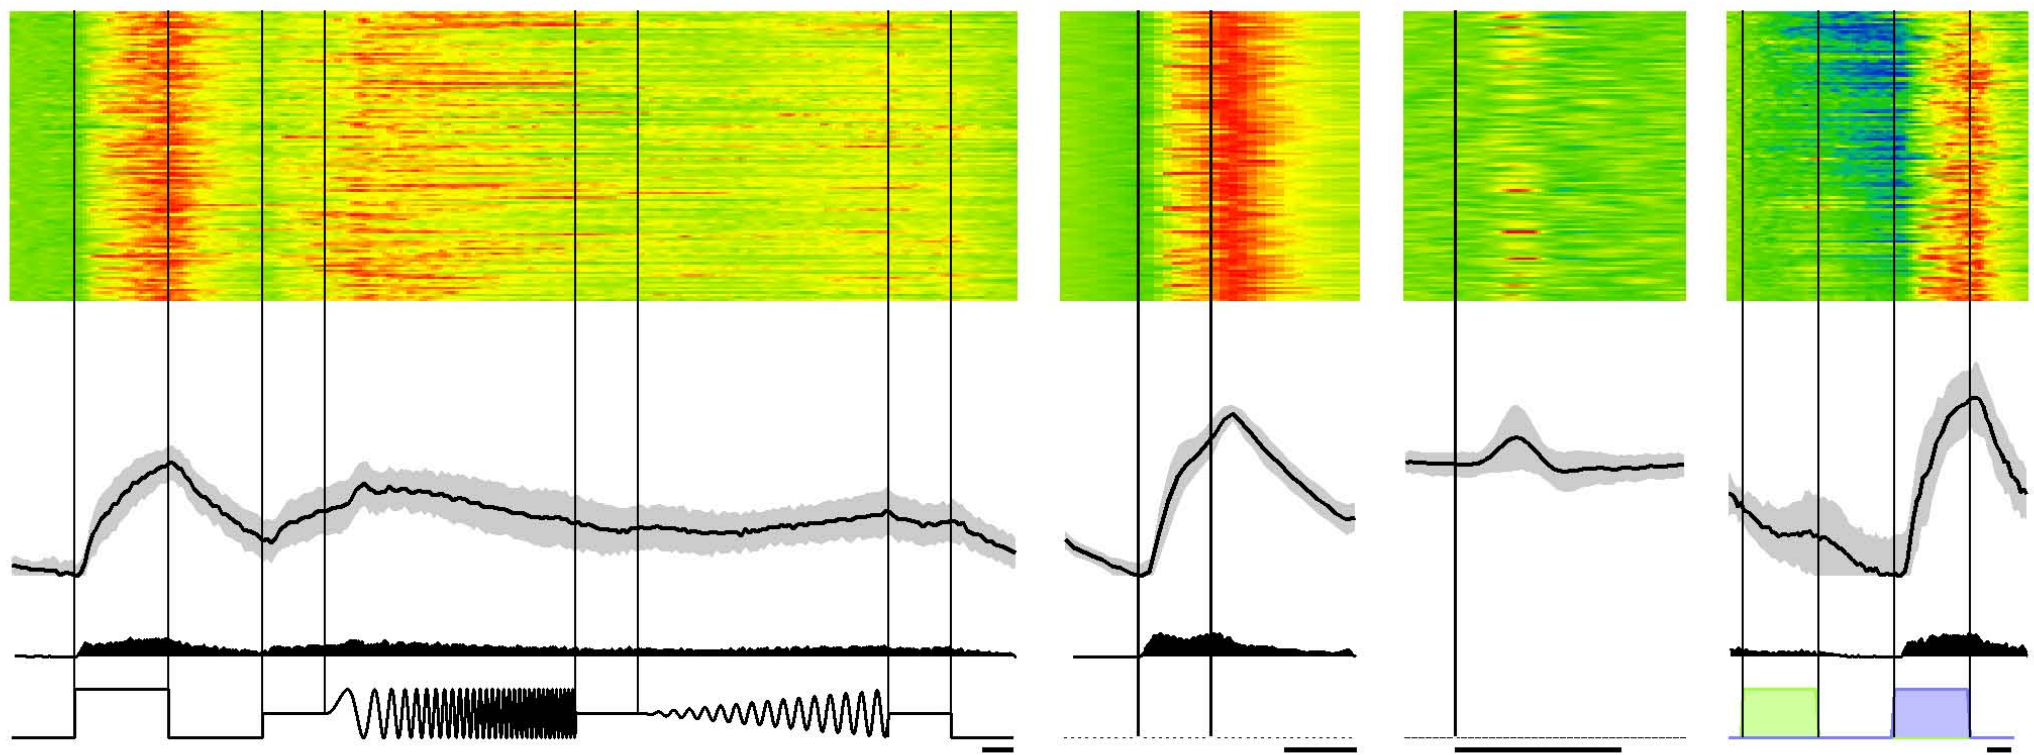

**b**

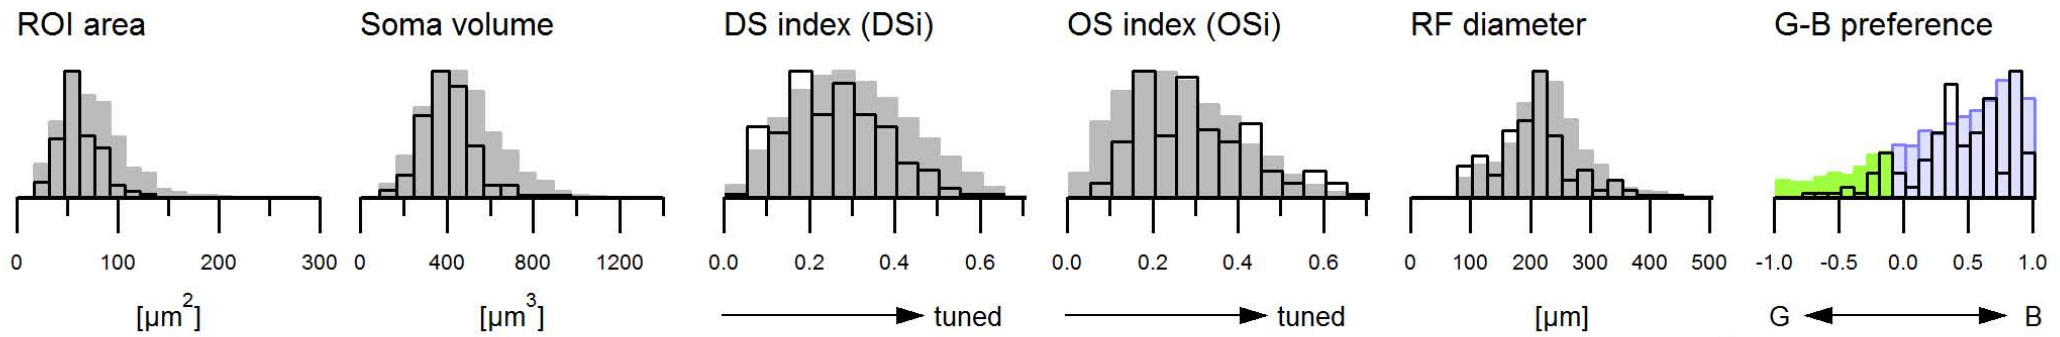

**c**

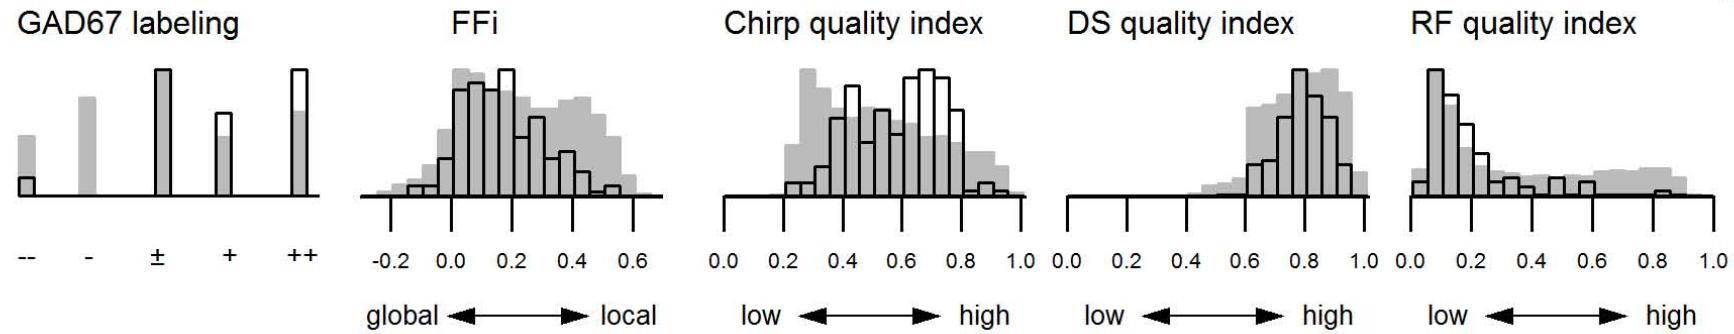

**d**

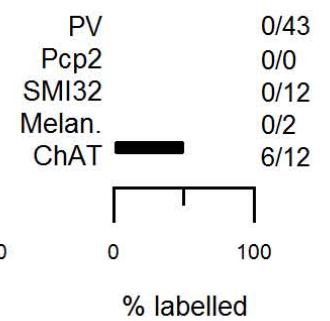

**Group 42 AC ON starburst (c)**

119 Cells, 1.49%, (4.02% of ACs); CF: 1.02

SFig. 3-68 a

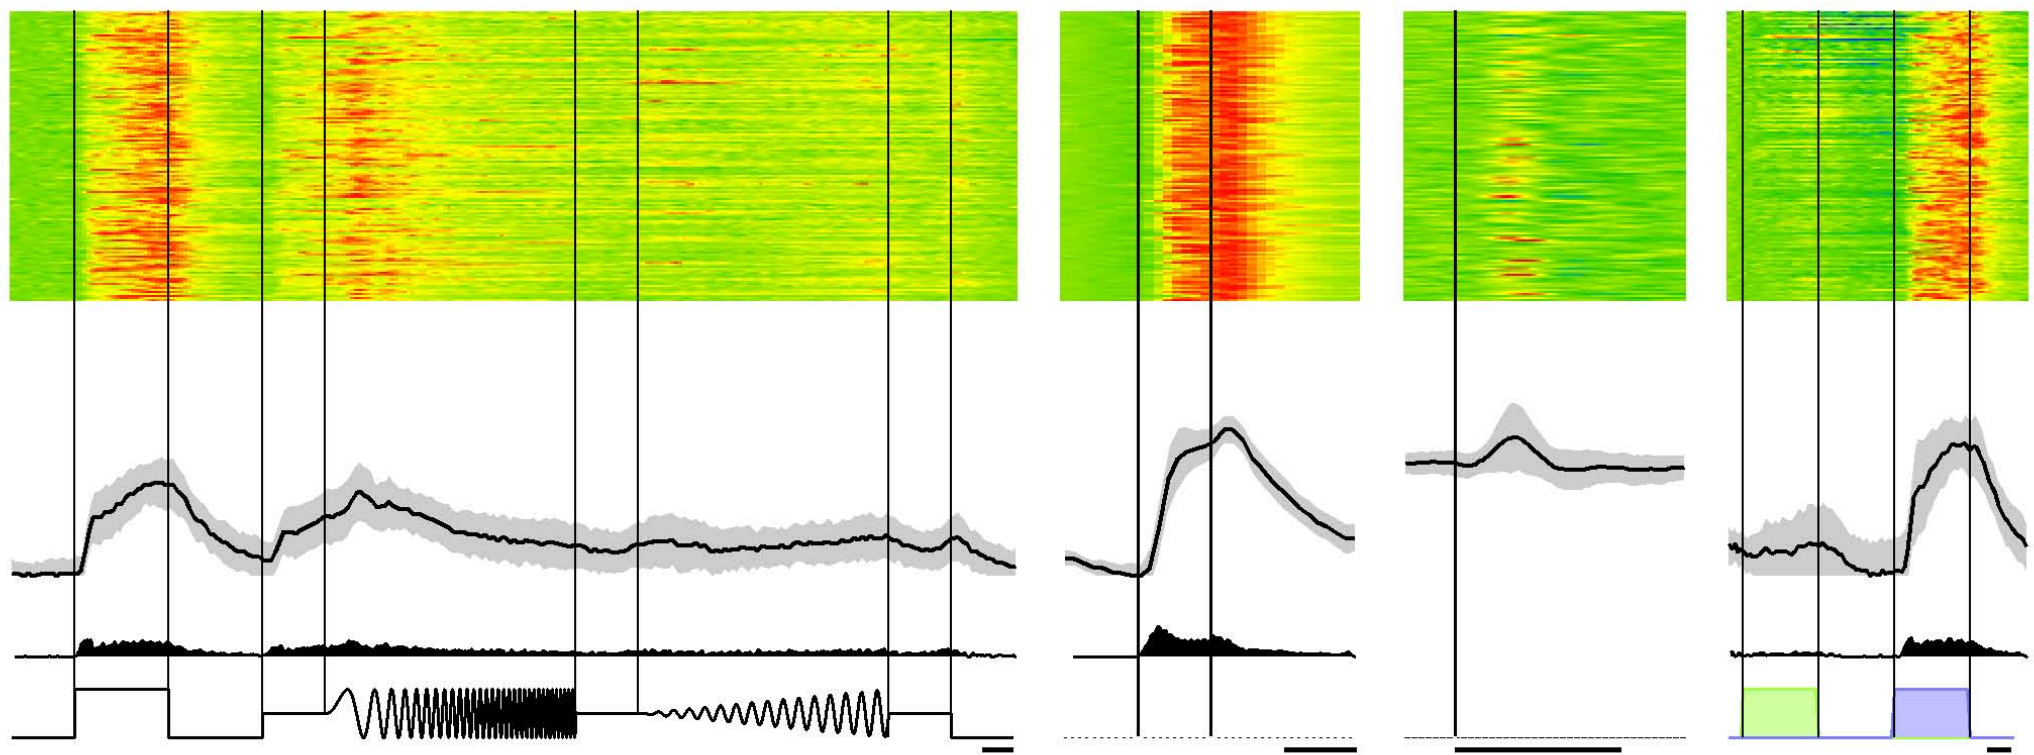

**b**

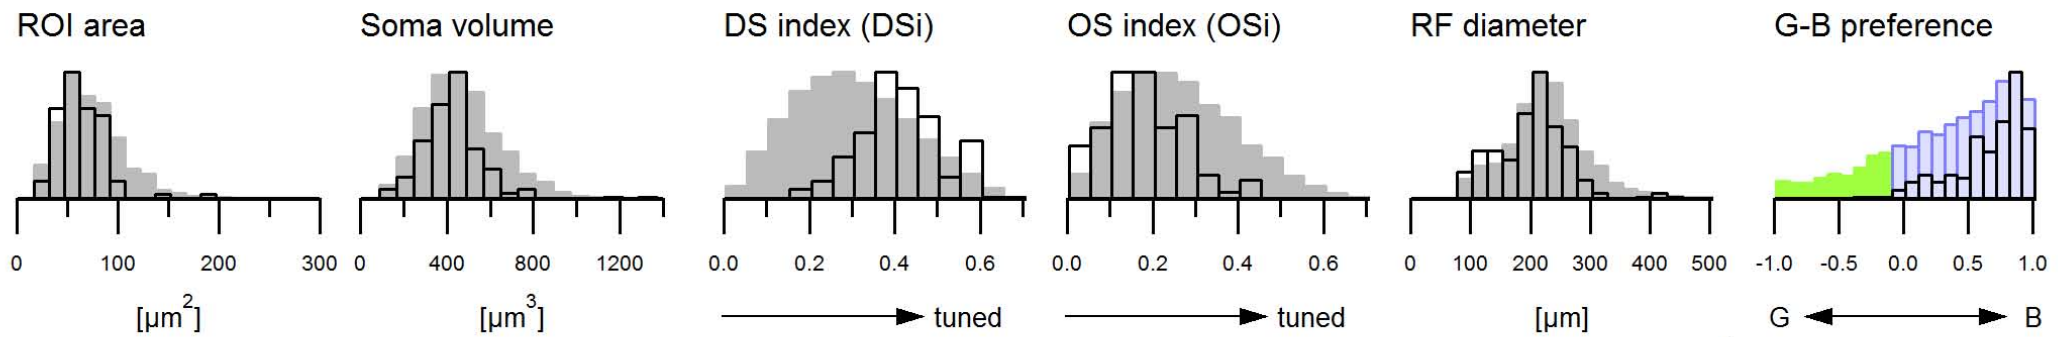

**c**

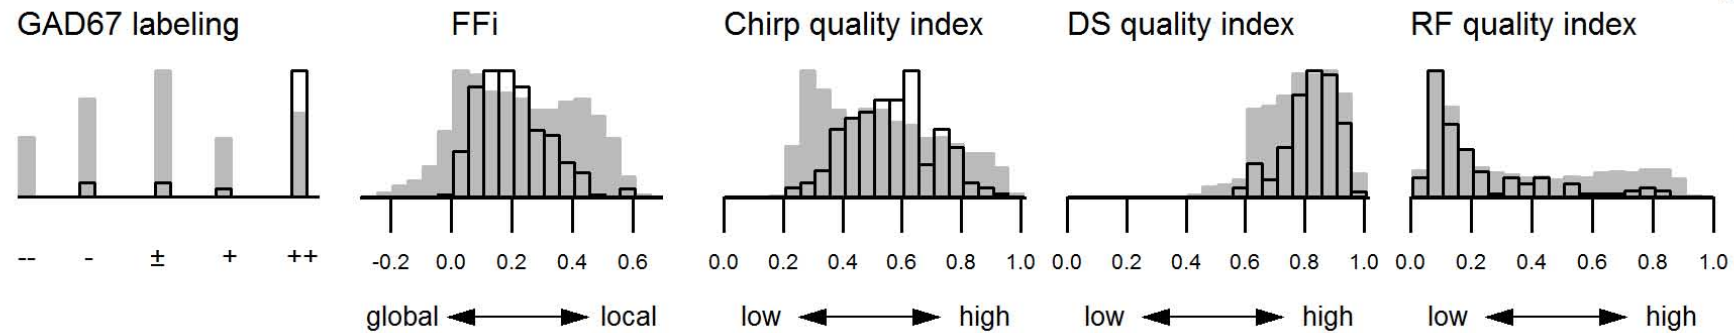

**d**

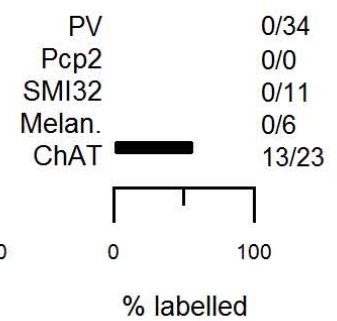

**Group 42** AC ON starburst (d)

140 Cells, 1.75%, (4.73% of ACs); CF: 1.42



SFig. 3-69 a

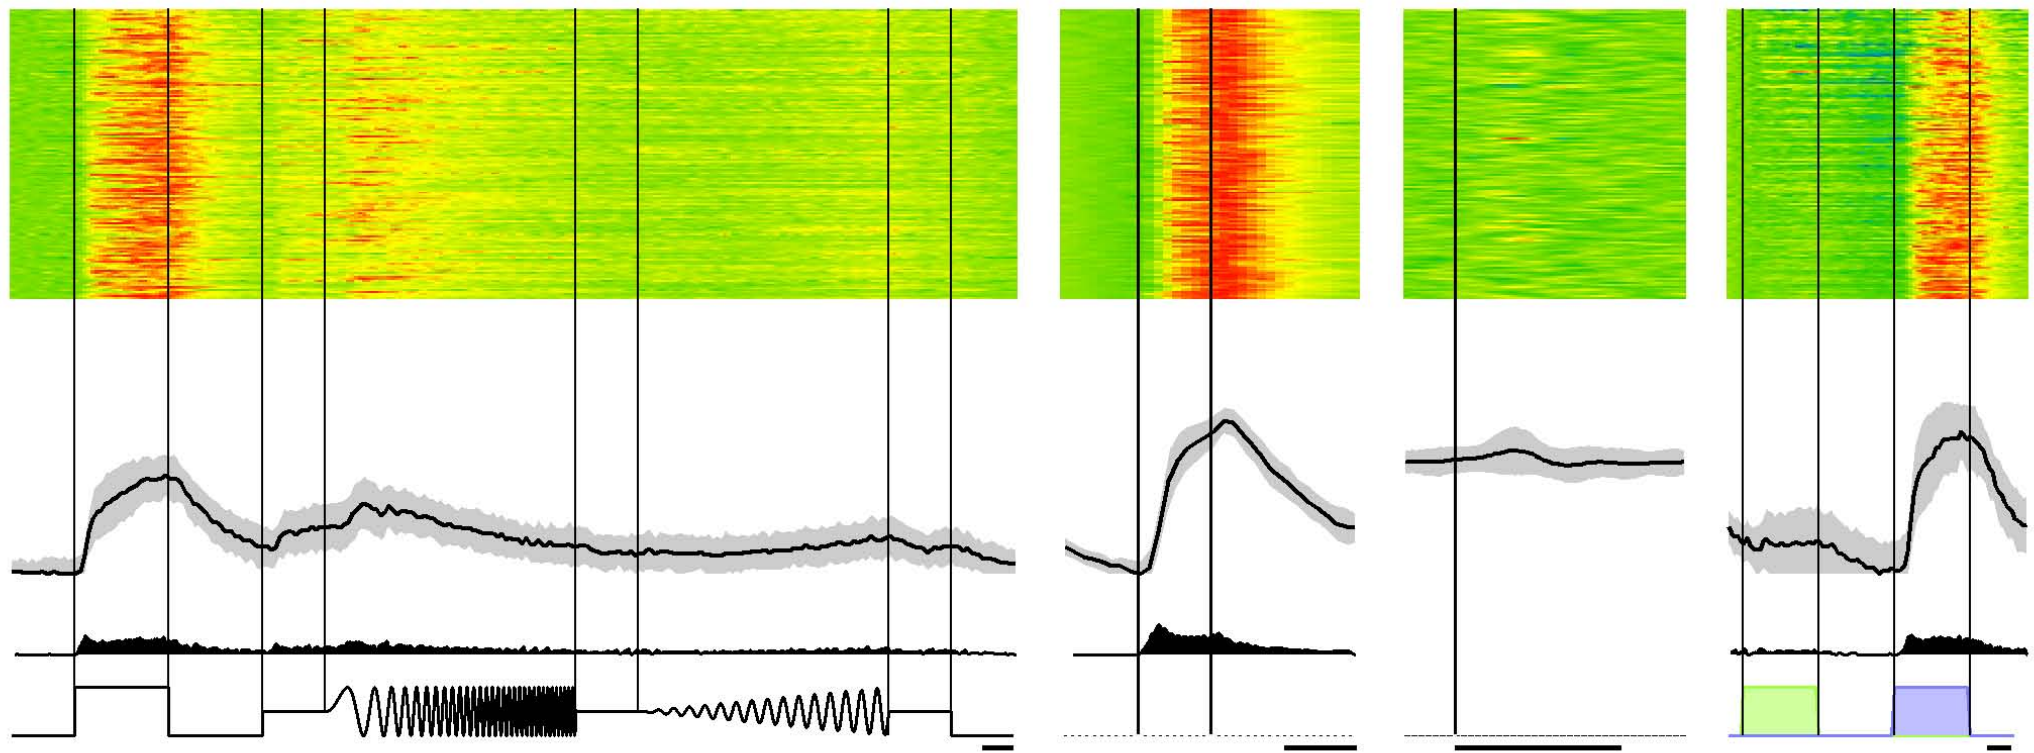

**b**

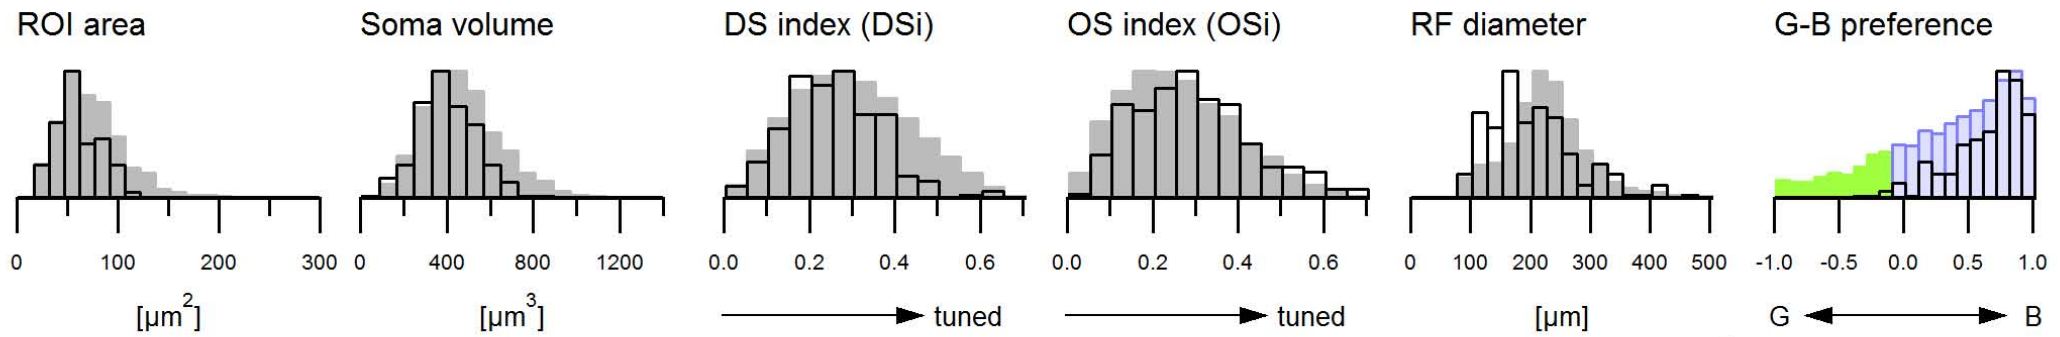

**c**

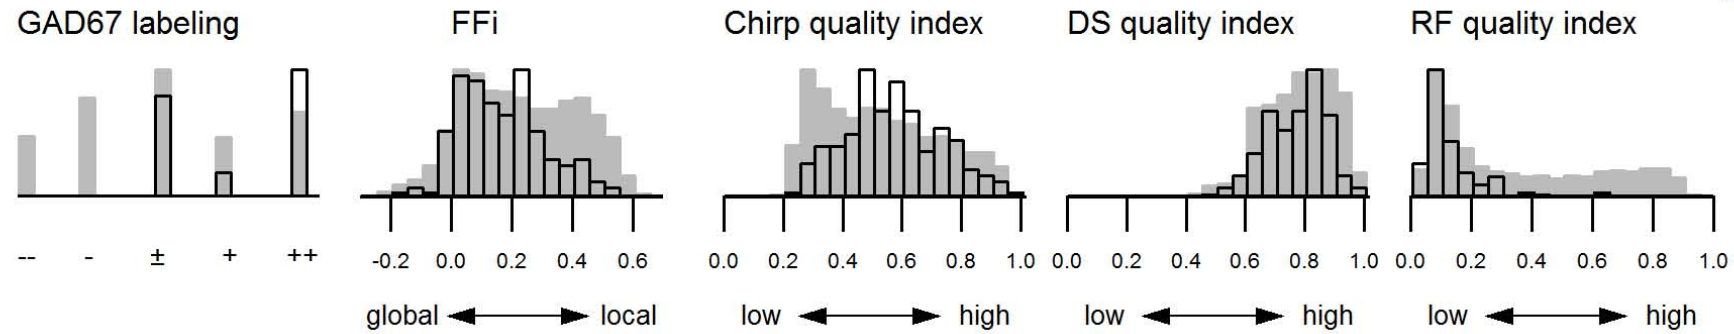

**d**

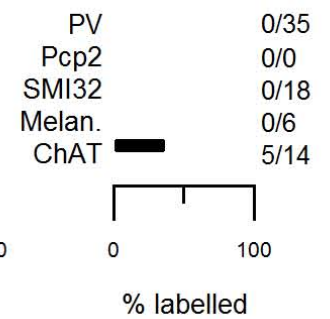

**Group 42** AC ON starburst (e)

151 Cells, 1.89%, (5.1% of ACs); CF: 2.01

SFig. 3-70 a

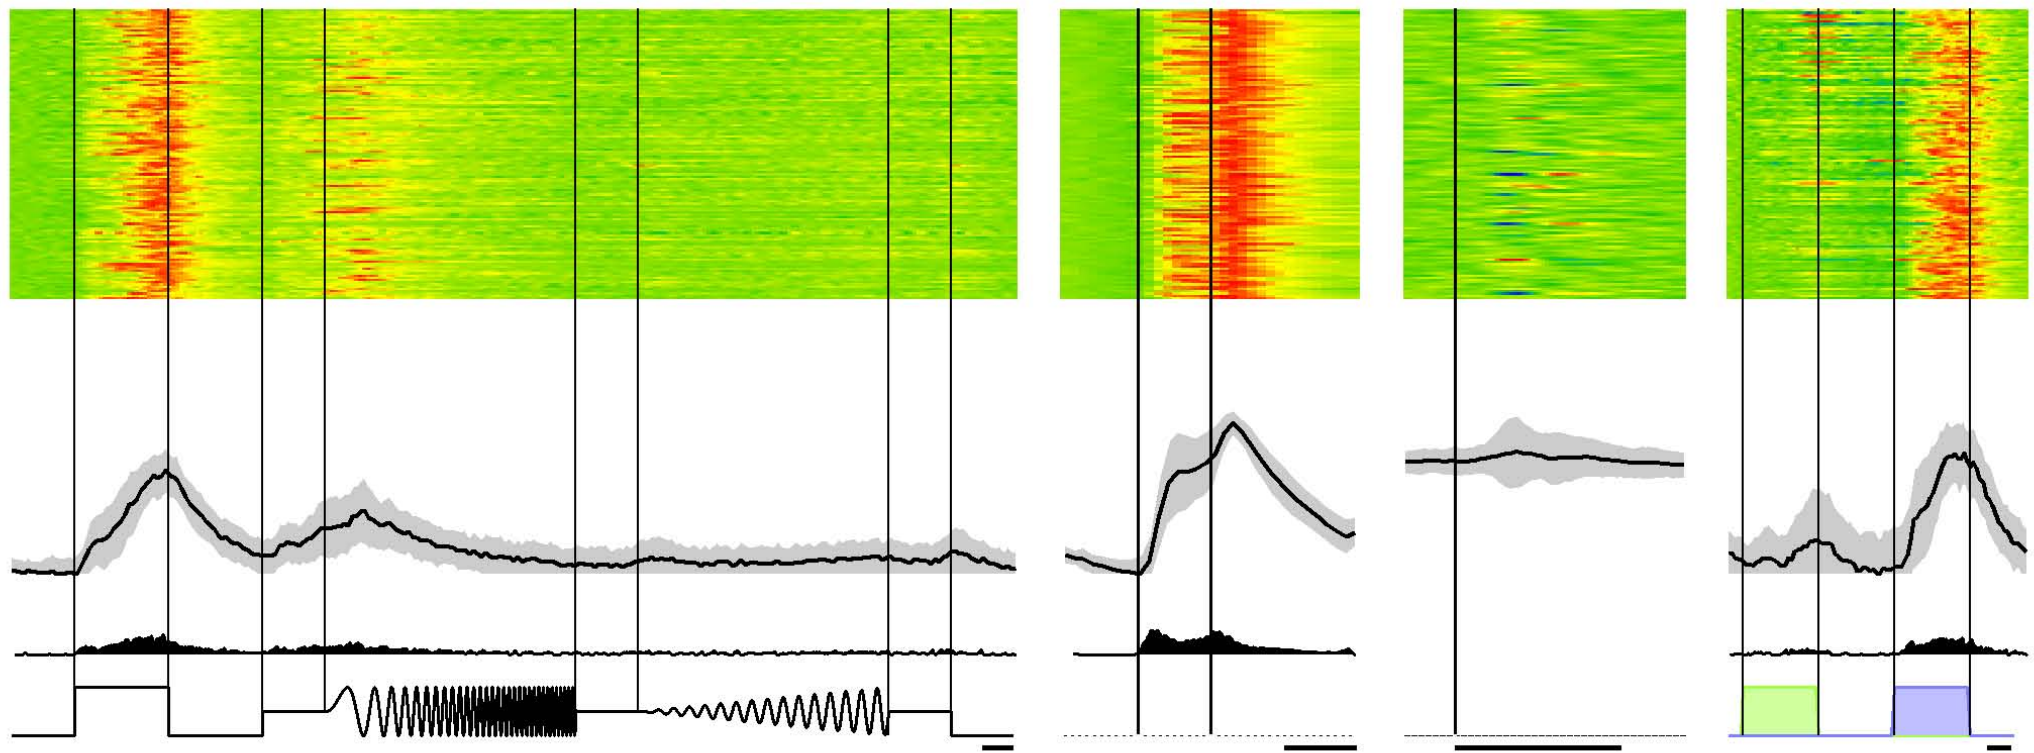

**b**

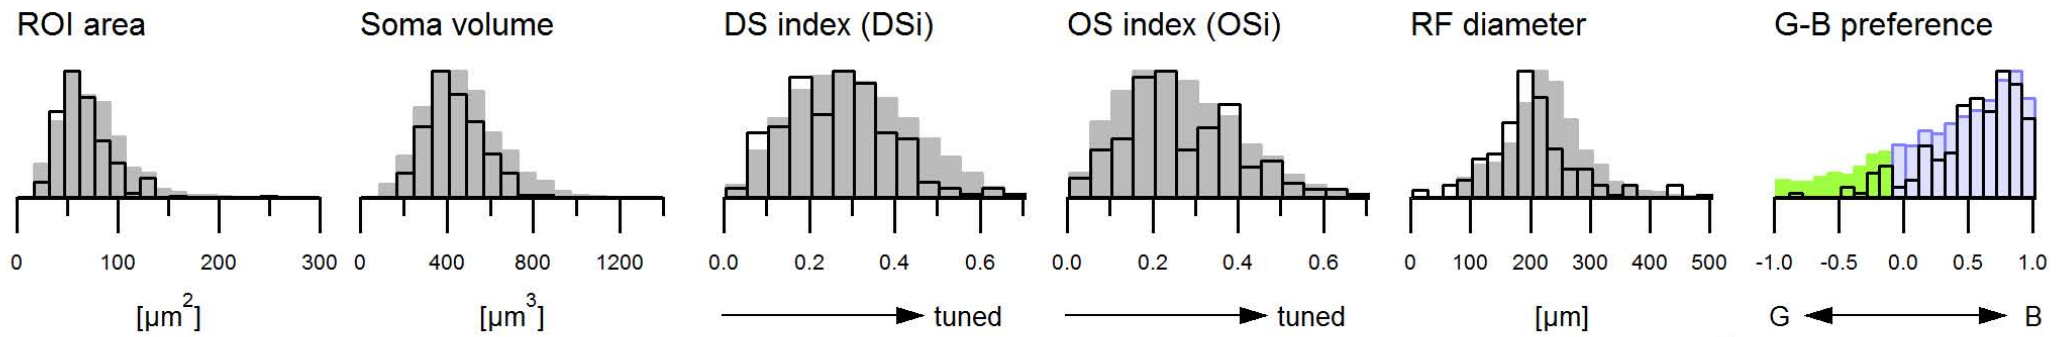

**c**

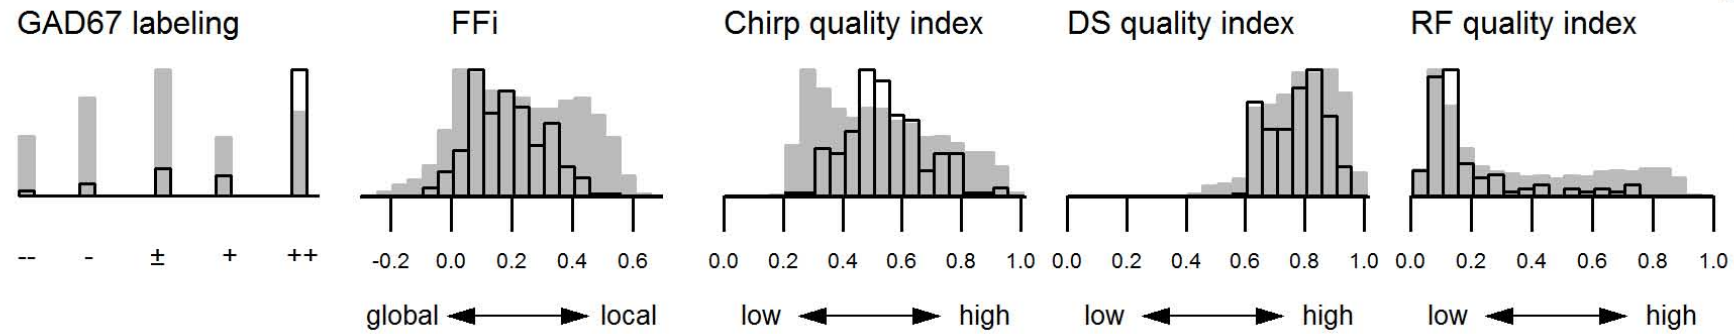

**d**

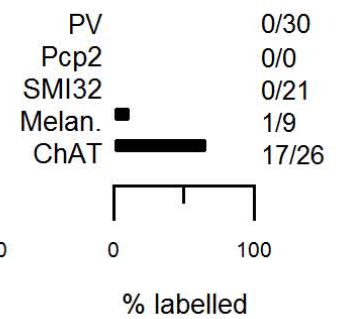

**Group 42 AC ON starburst (f)**

129 Cells, 1.62%, (4.36% of ACs); CF: 2.12



SFig. 3-71 a

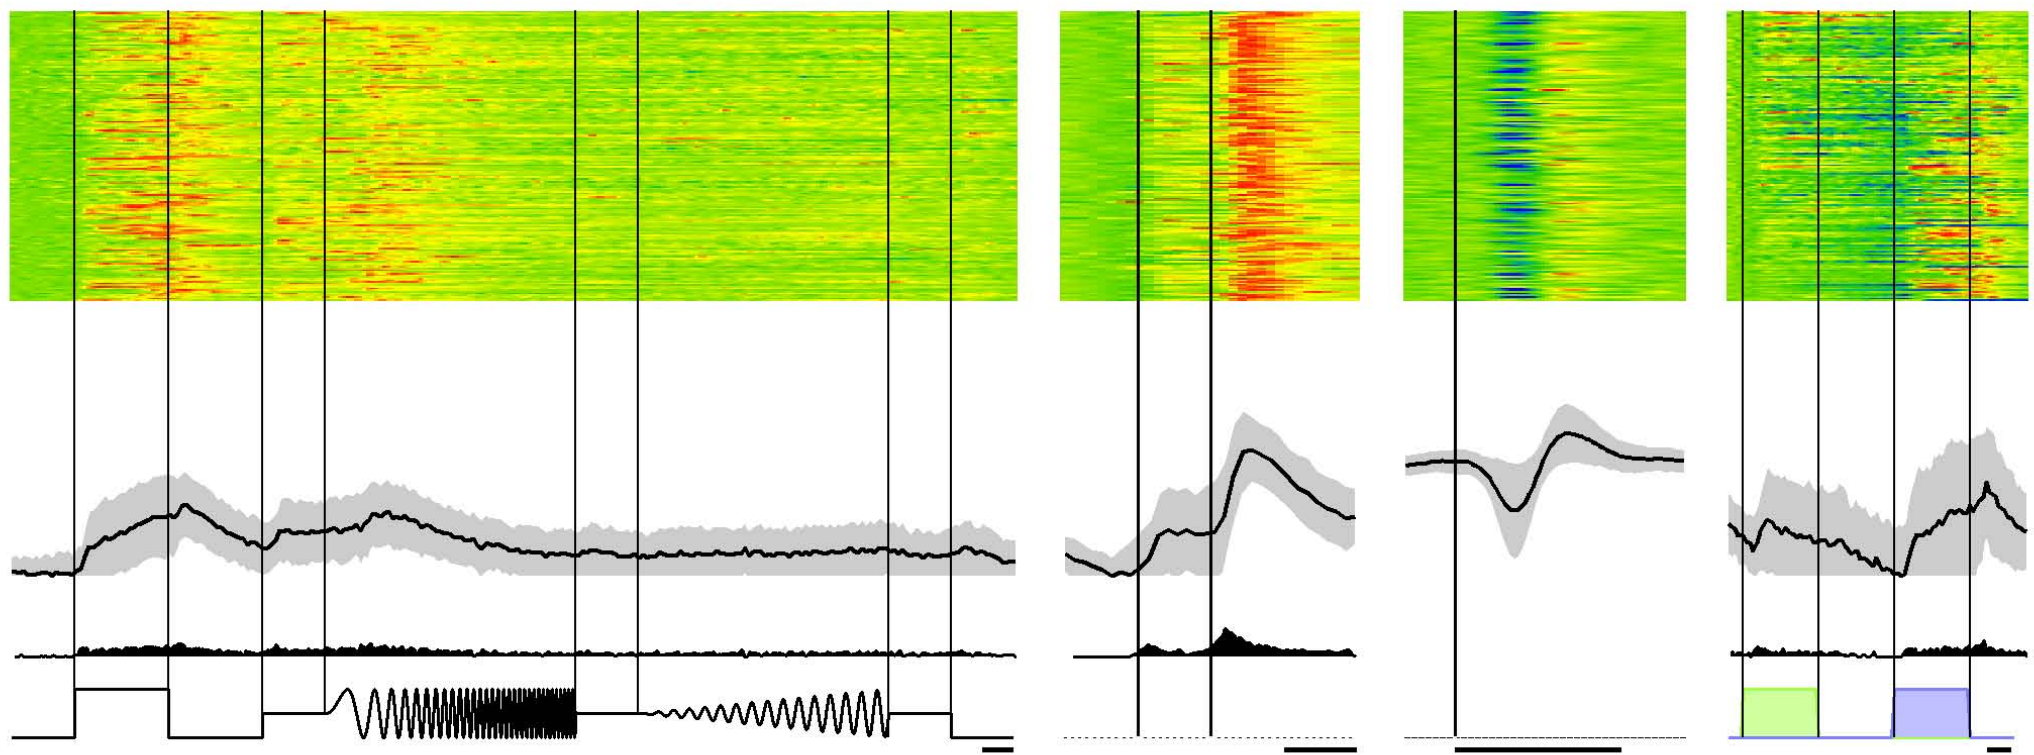

**b**

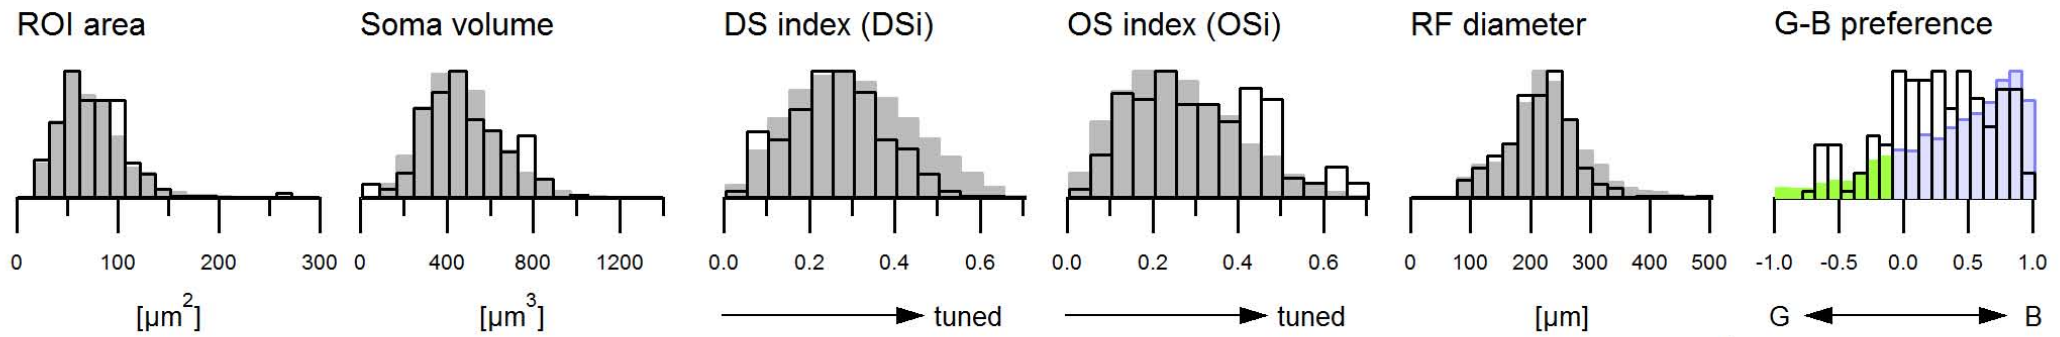

**c**

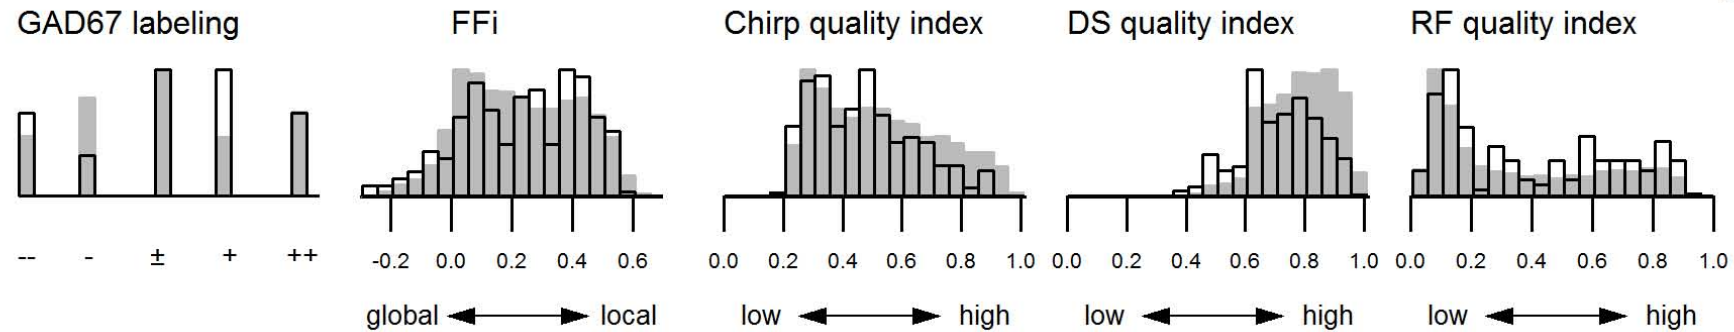

**d**

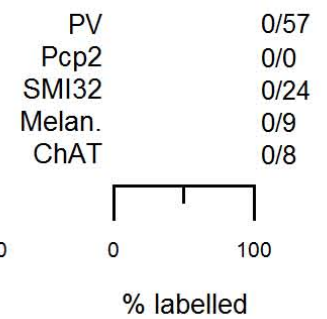

**Group 43 AC ON-OFF local**  
 174 Cells, 2.18%, (5.88% of ACs); CF: 2.31

SFig. 3-72 a

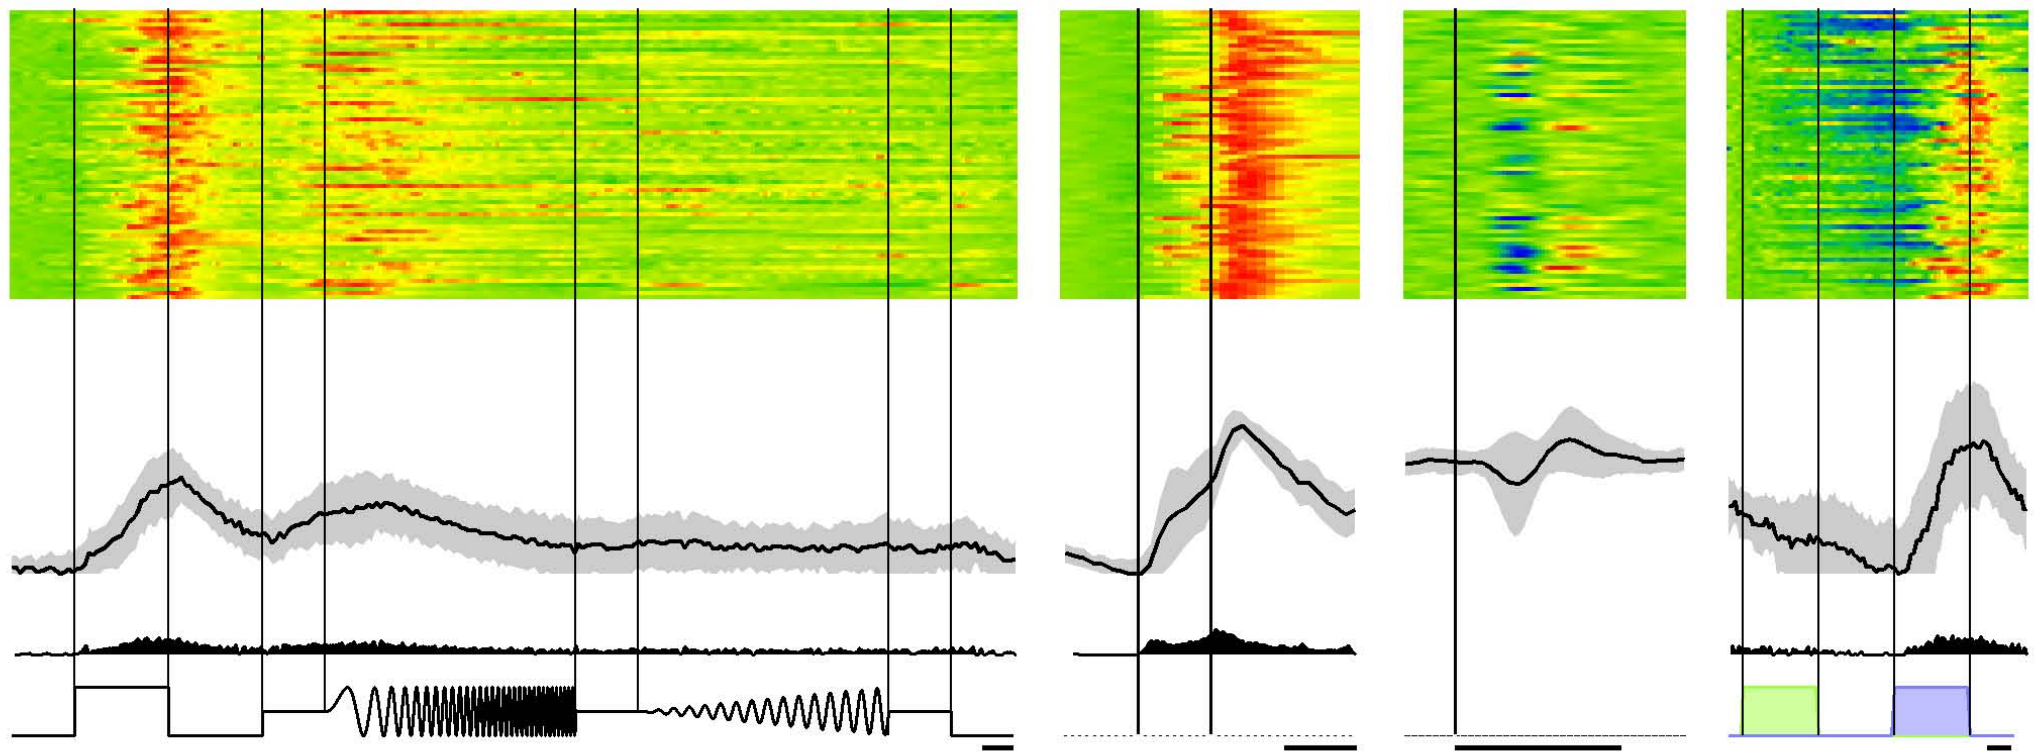

**b**

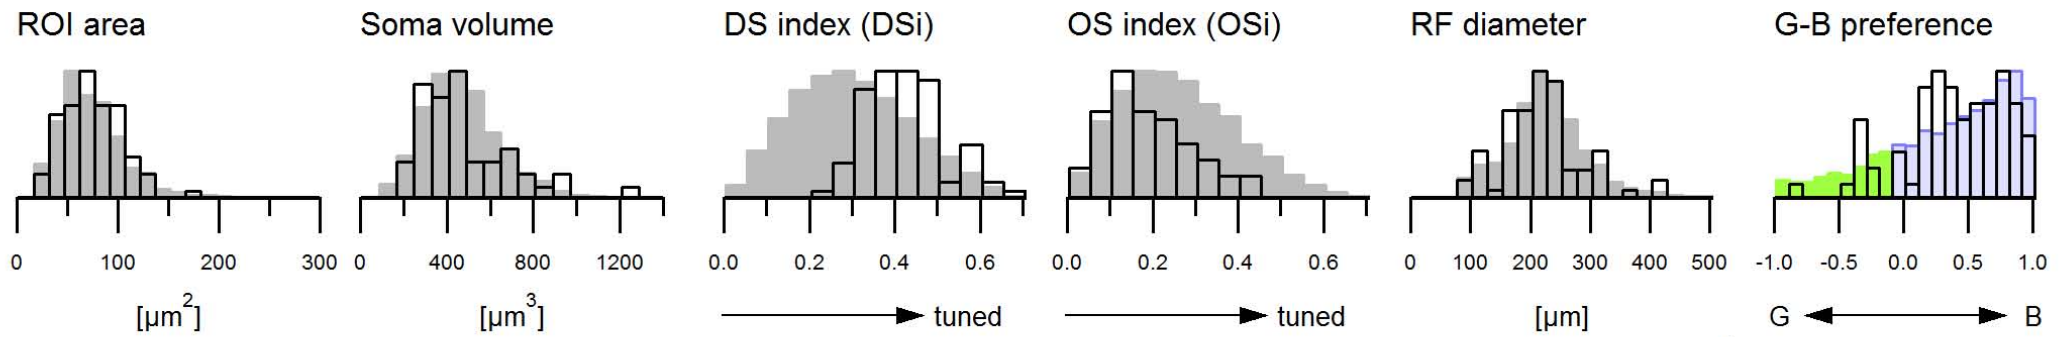

**c**

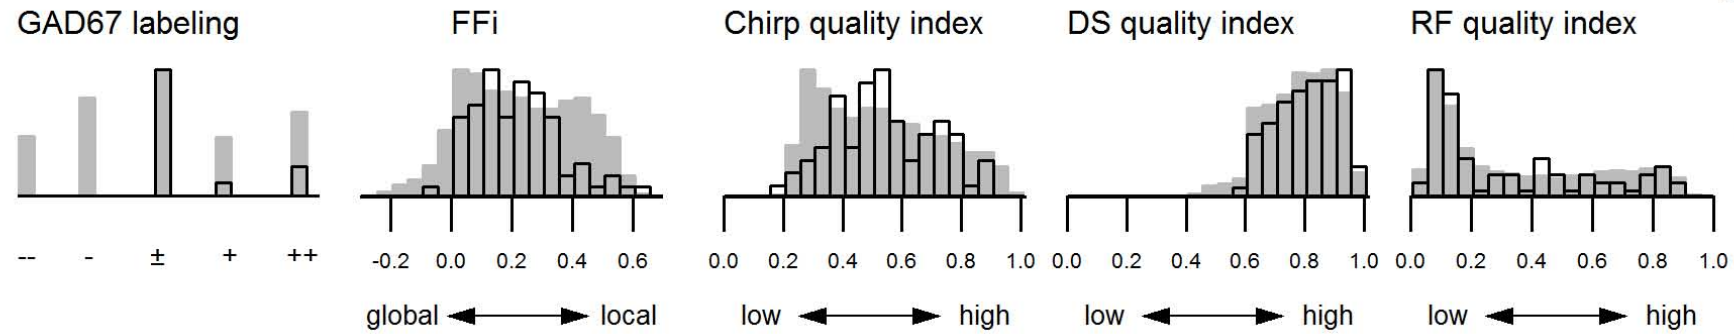

**d**

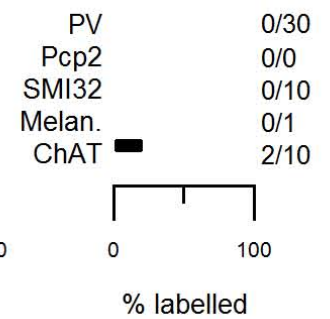

**Group 44 AC ON step**

70 Cells, 0.88%, (2.37% of ACs); CF: 2.01



SFig. 3-73 a

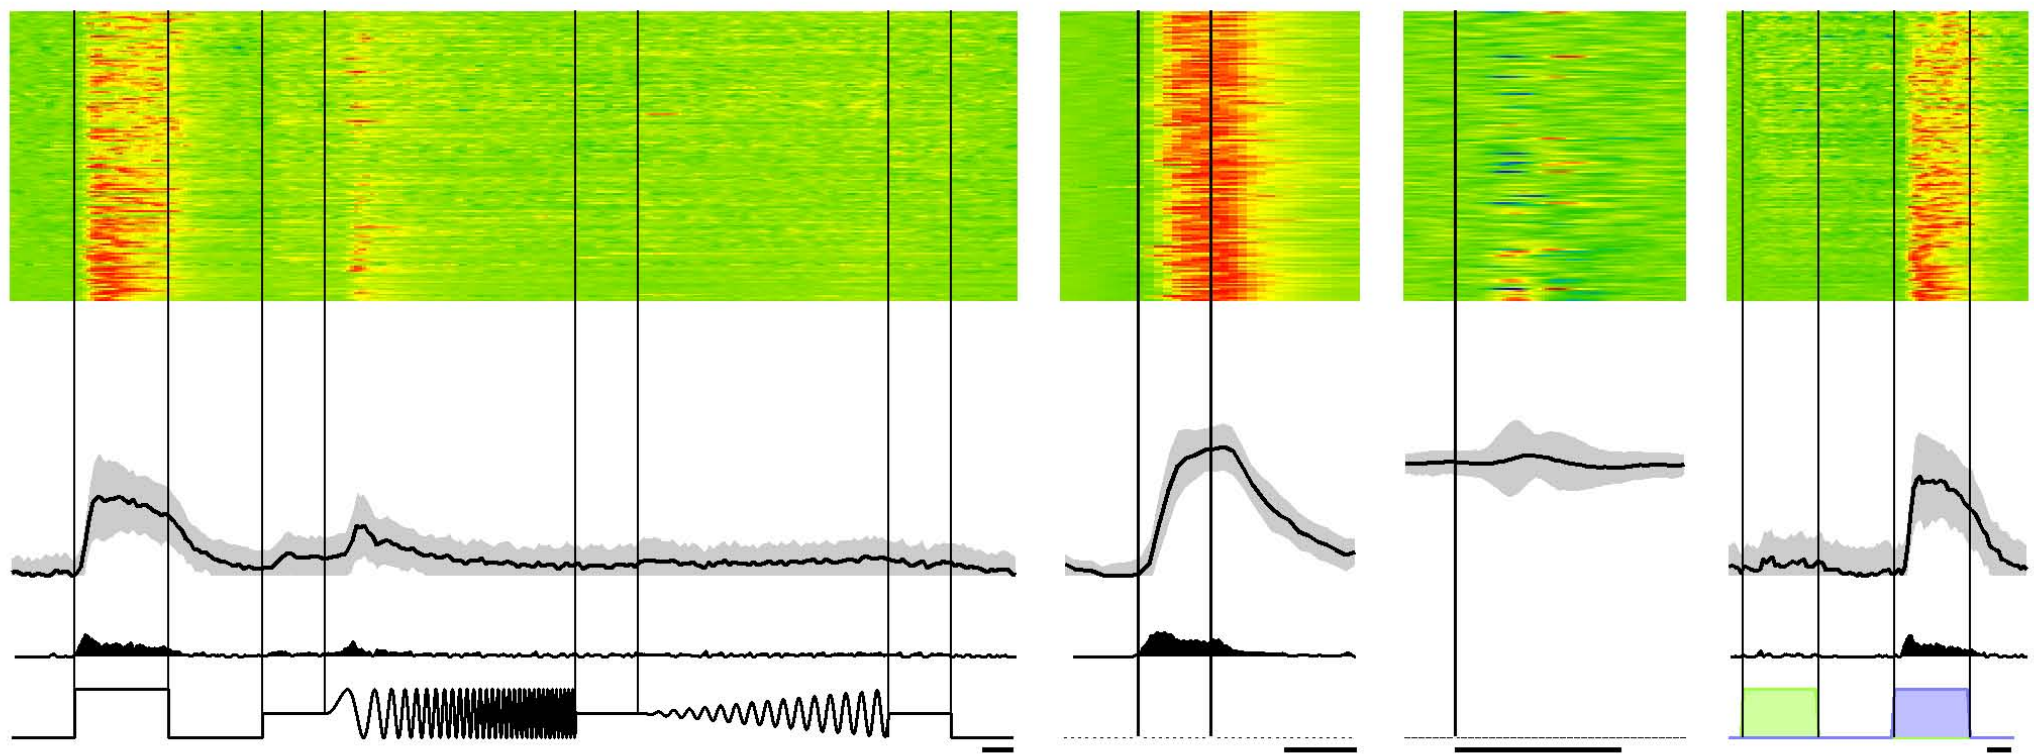

**b**

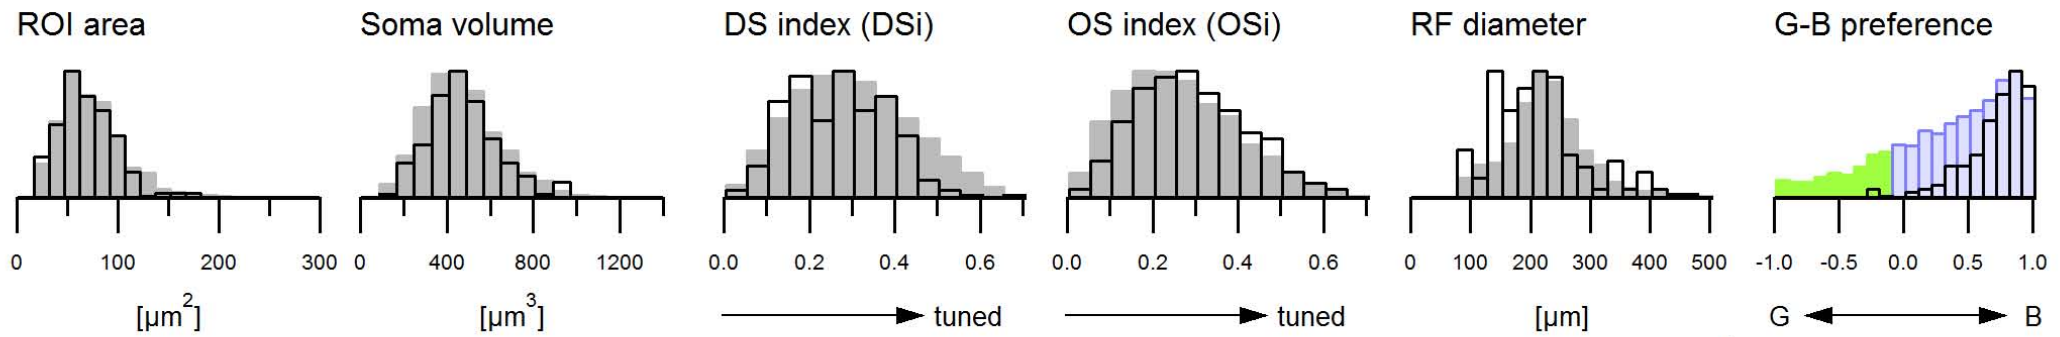

**c**

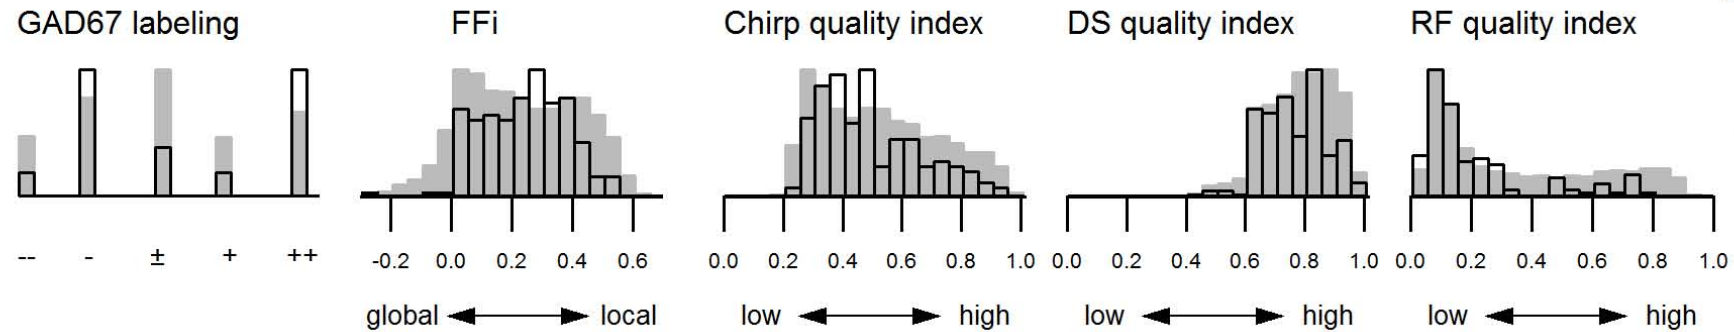

**d**

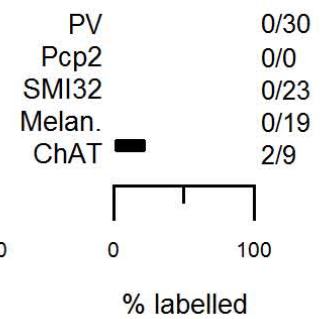

**Group 45 AC ON local 1**

156 Cells, 1.95%, (5.27% of ACs); CF: 2.56

SFig. 3-74 a

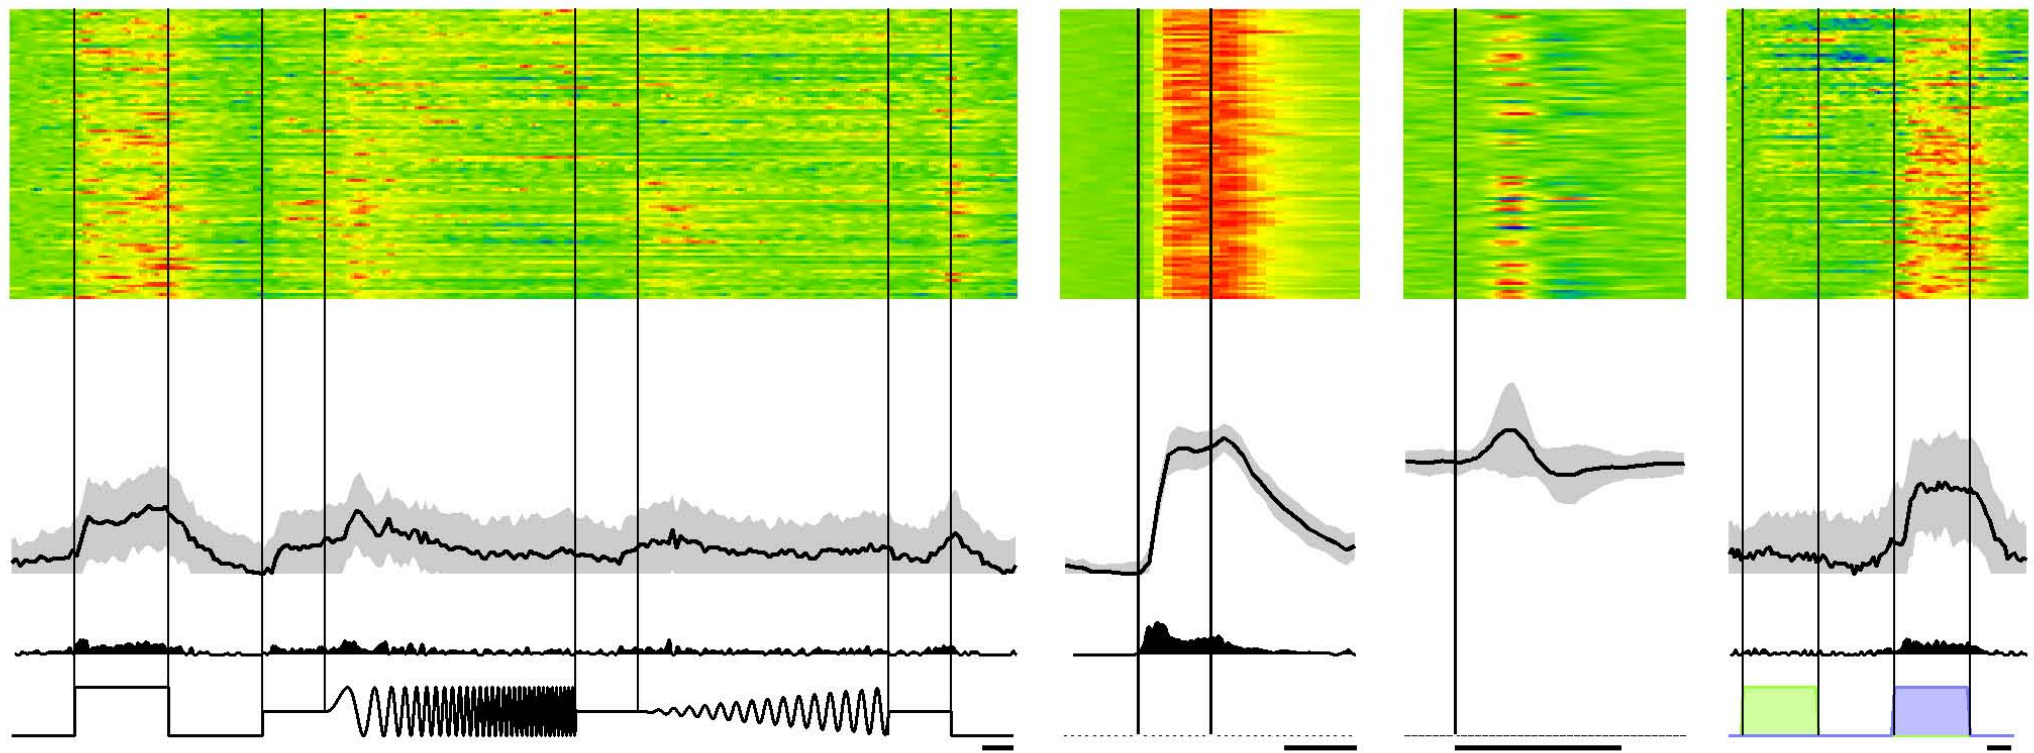

**b**

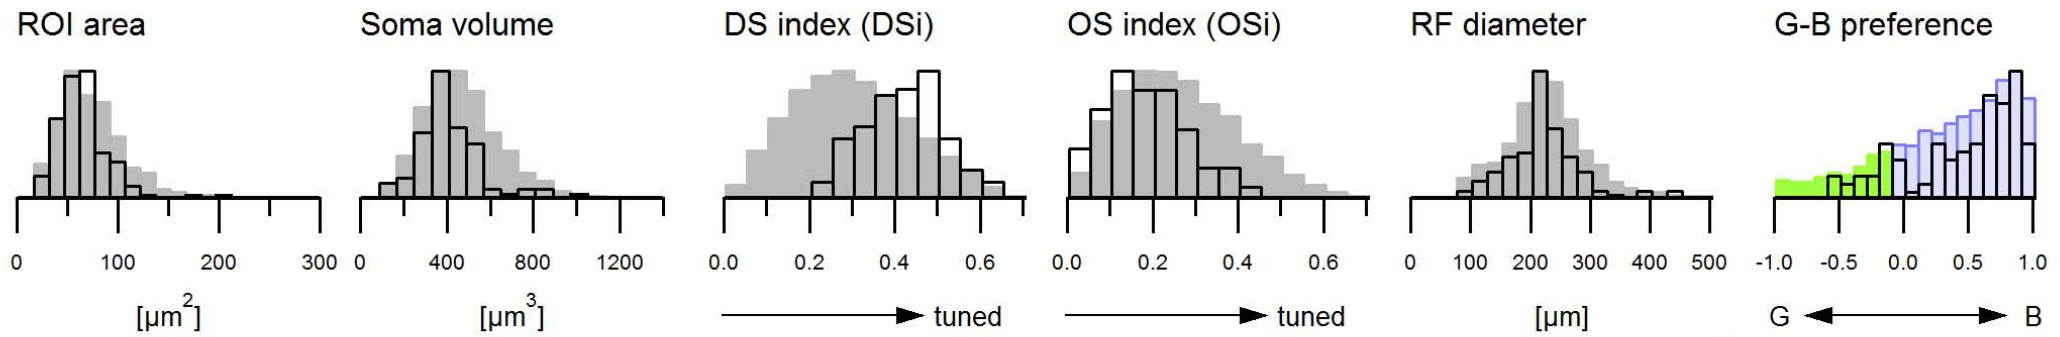

**c**

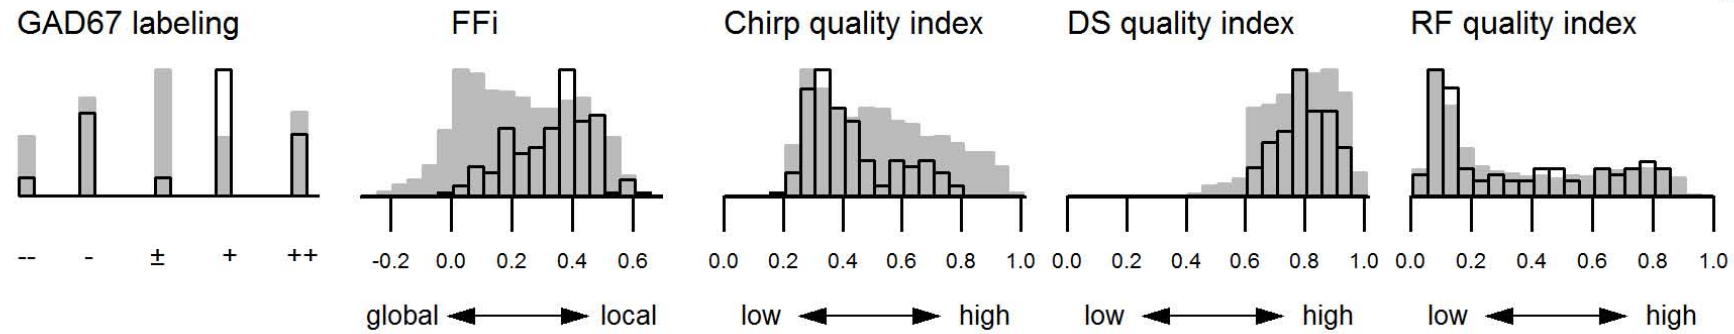

**d**

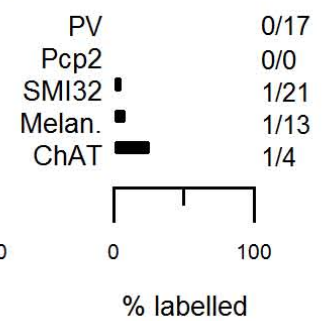

**Group 46** AC ON local 2 (a)

99 Cells, 1.24%, (3.35% of ACs); CF: 1.49



SFig. 3-75 a

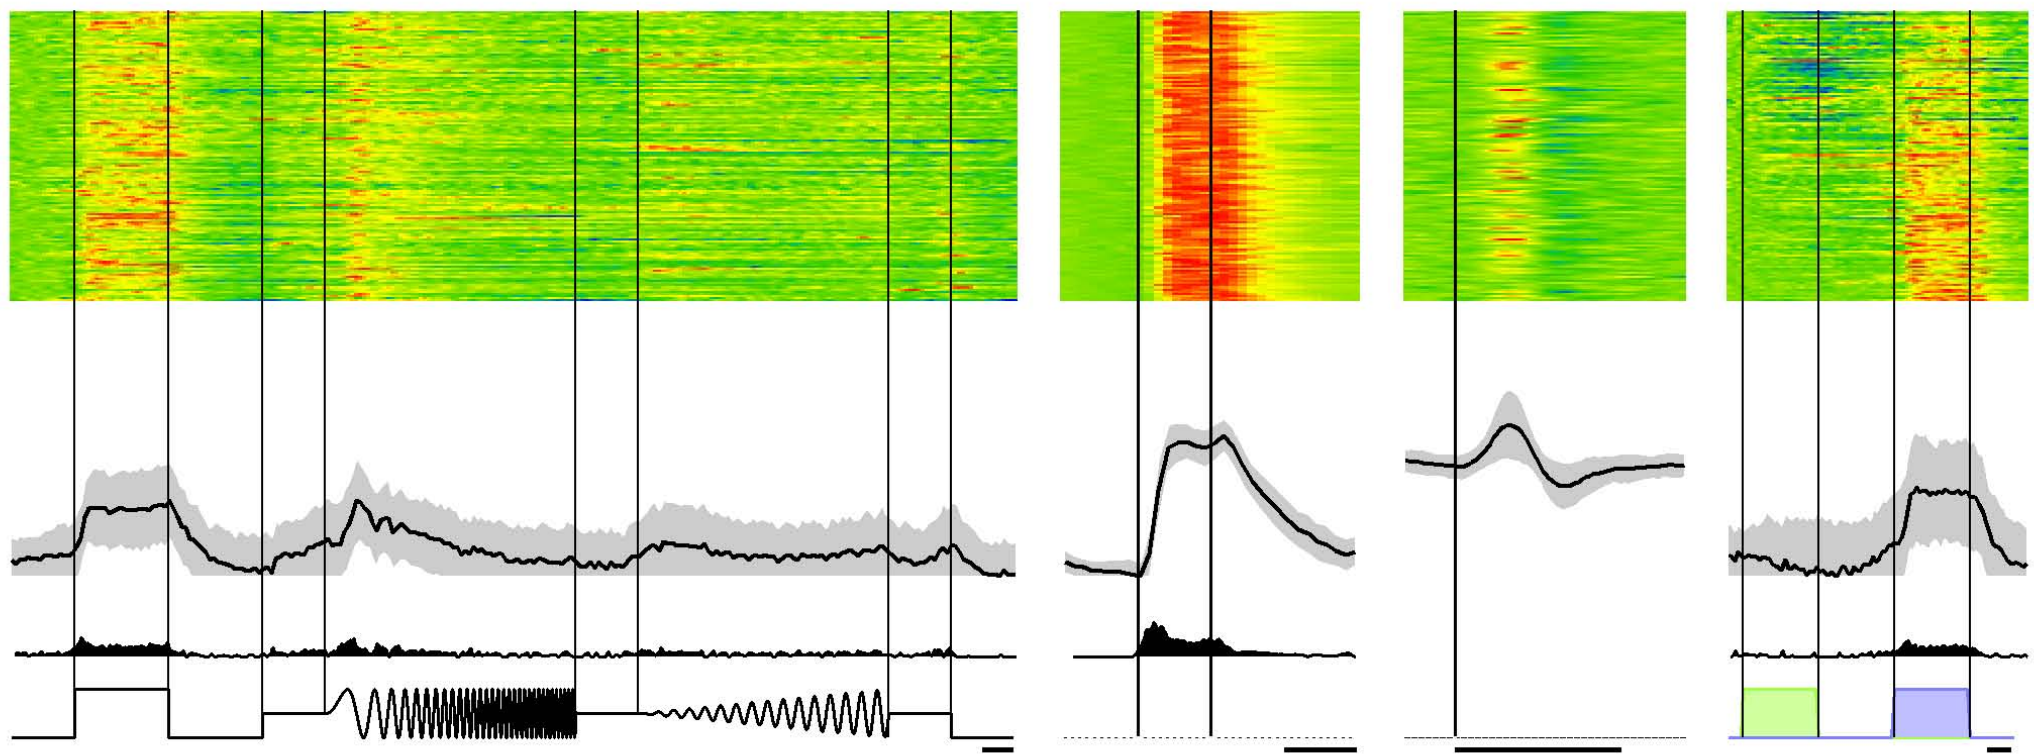

**b**

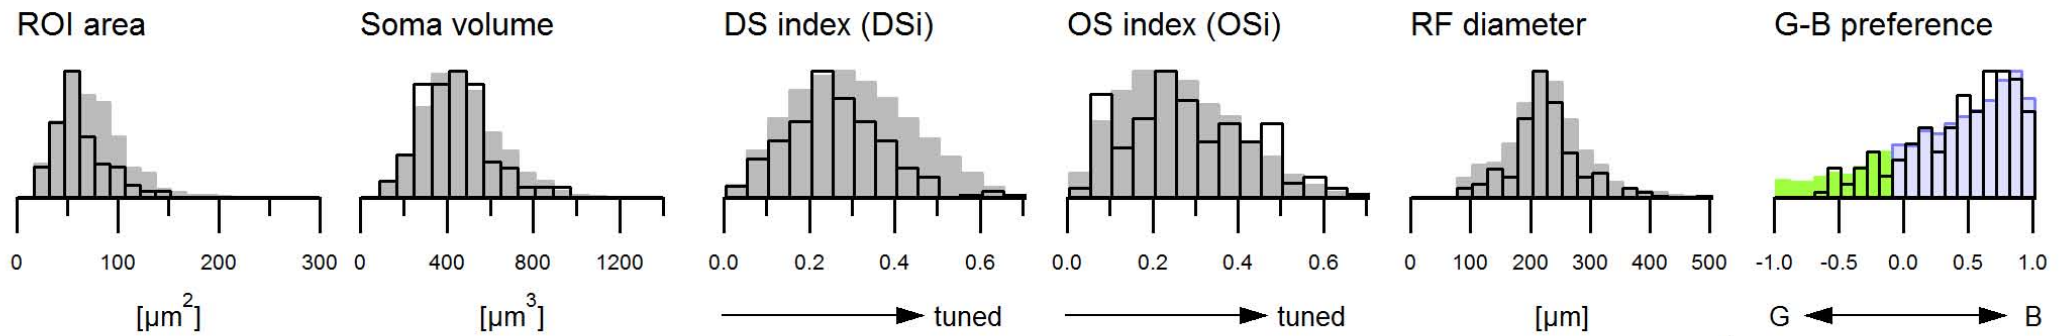

**c**

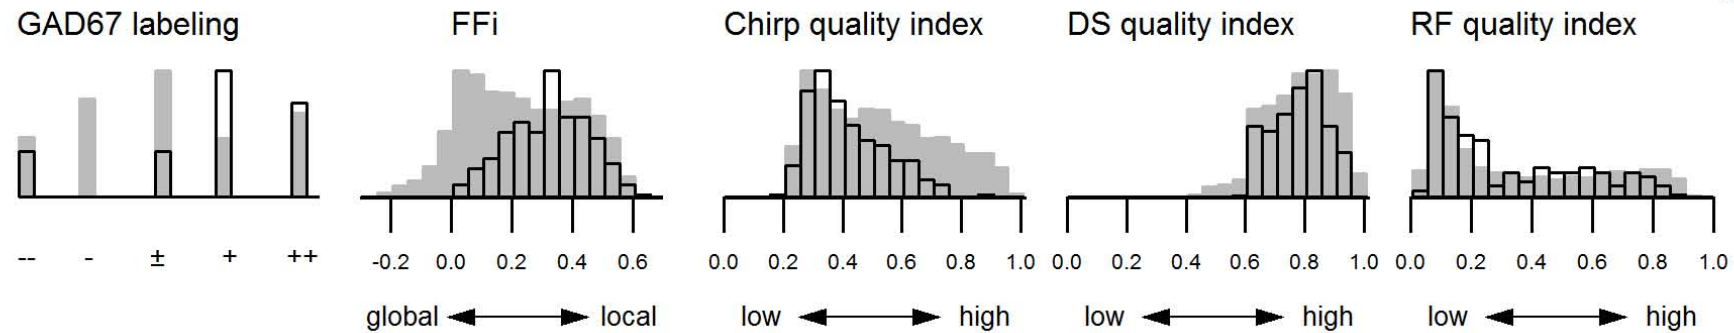

**d**

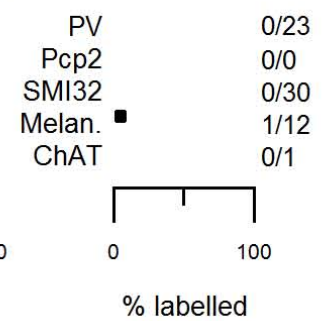

**Group 46** AC ON local 2 (b)

138 Cells, 1.73%, (4.67% of ACs); CF: 2.29
