# Supplementary material
Source: PubMed Central journal article supplement (PMC4724341)
Supplement: NIHMS739303-supplement-4.pdf [file NIHMS739303-supplement-4.pdf]

SFig. 4-1 a

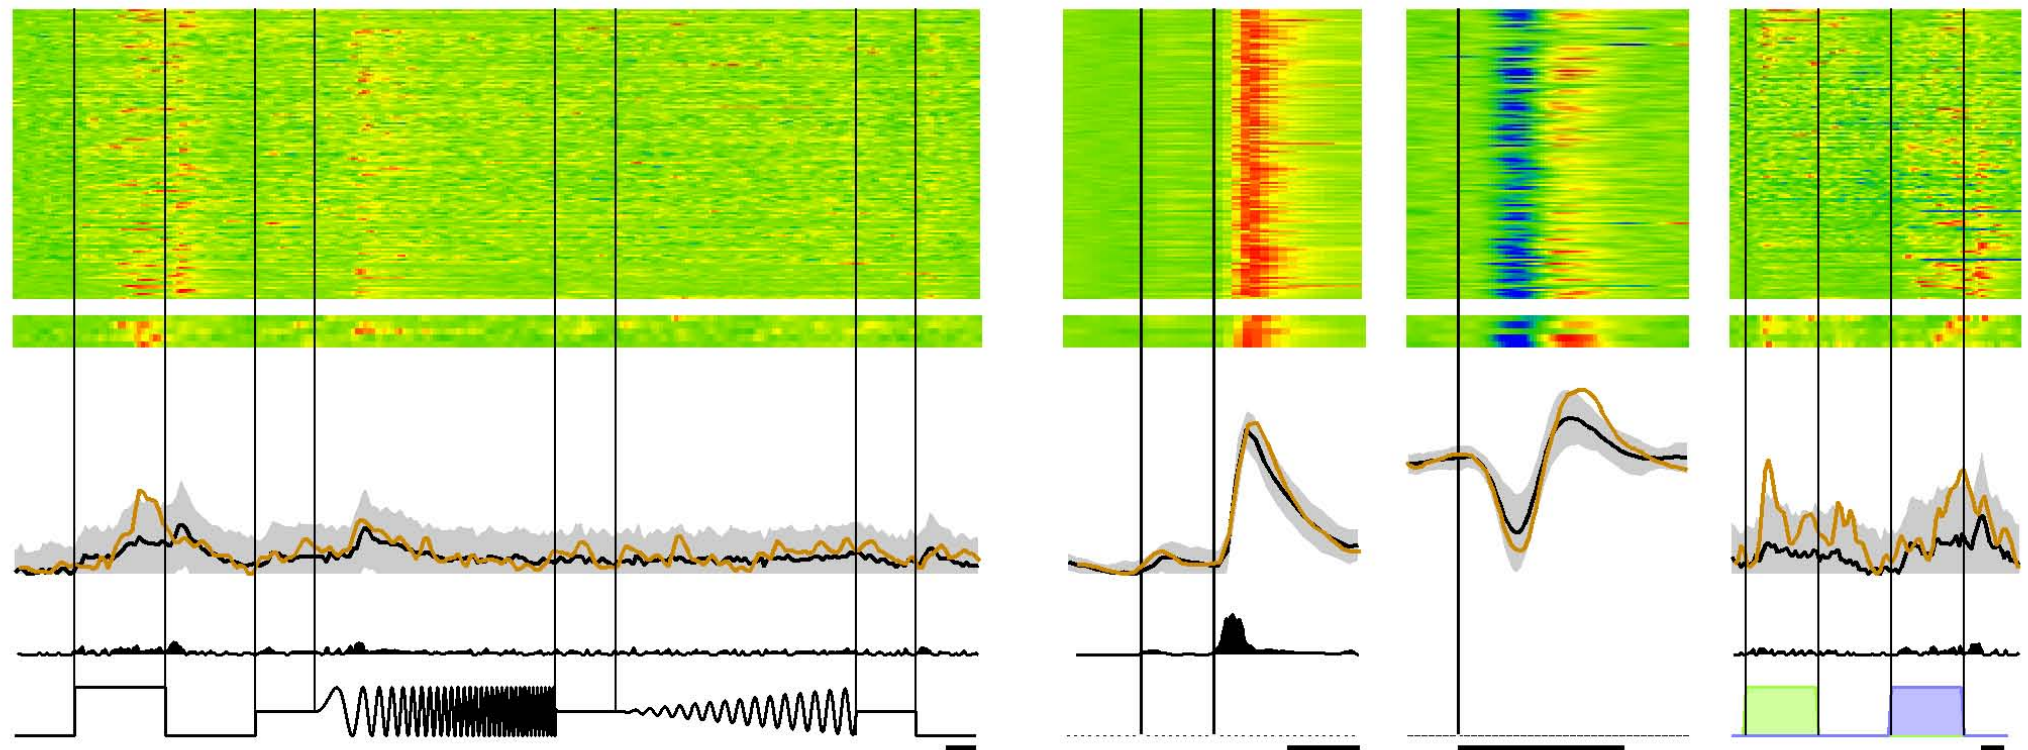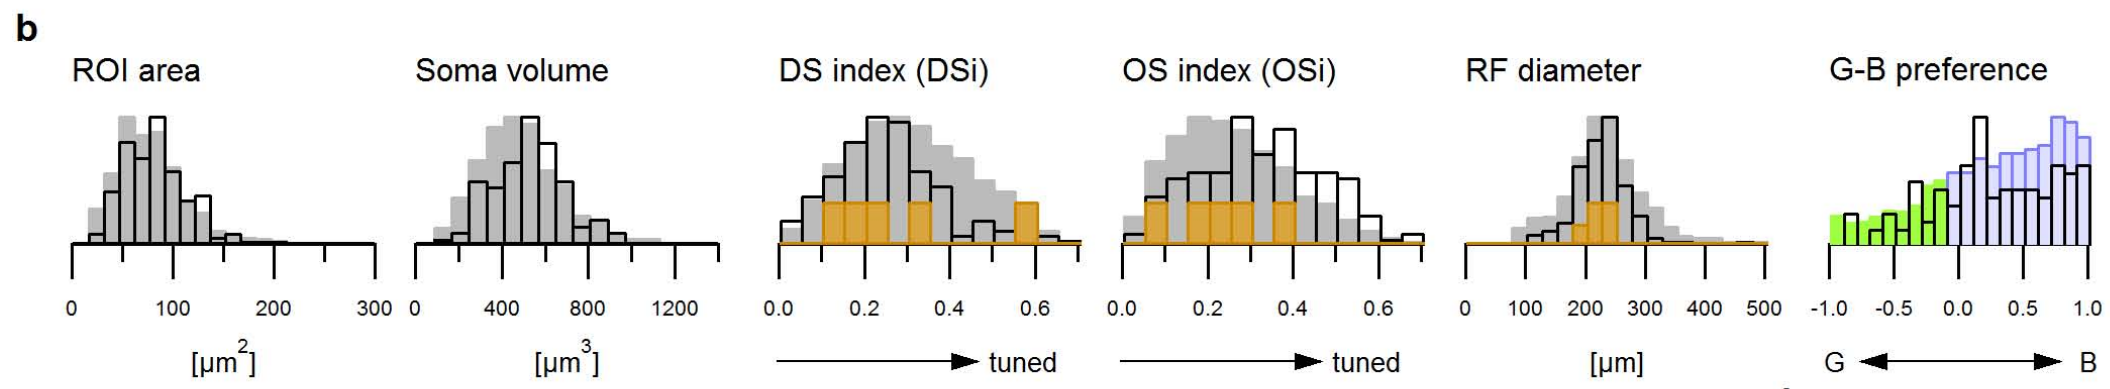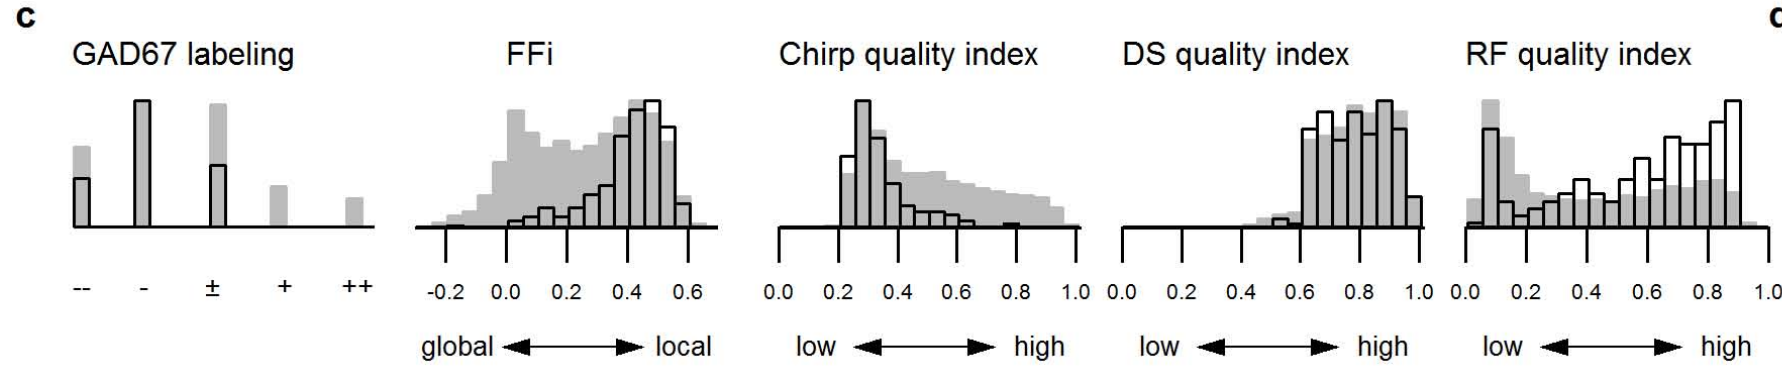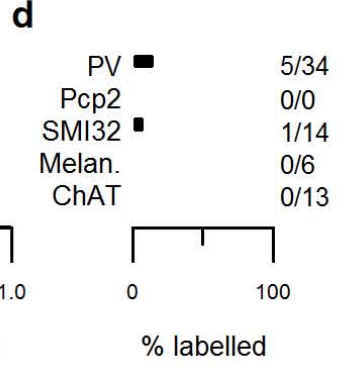

**Group 1** OFF local, OS  
 n = 143 Cells, 2.85%, (2.85% of RGCs); CF: 2.48

SFig. 4-2 a

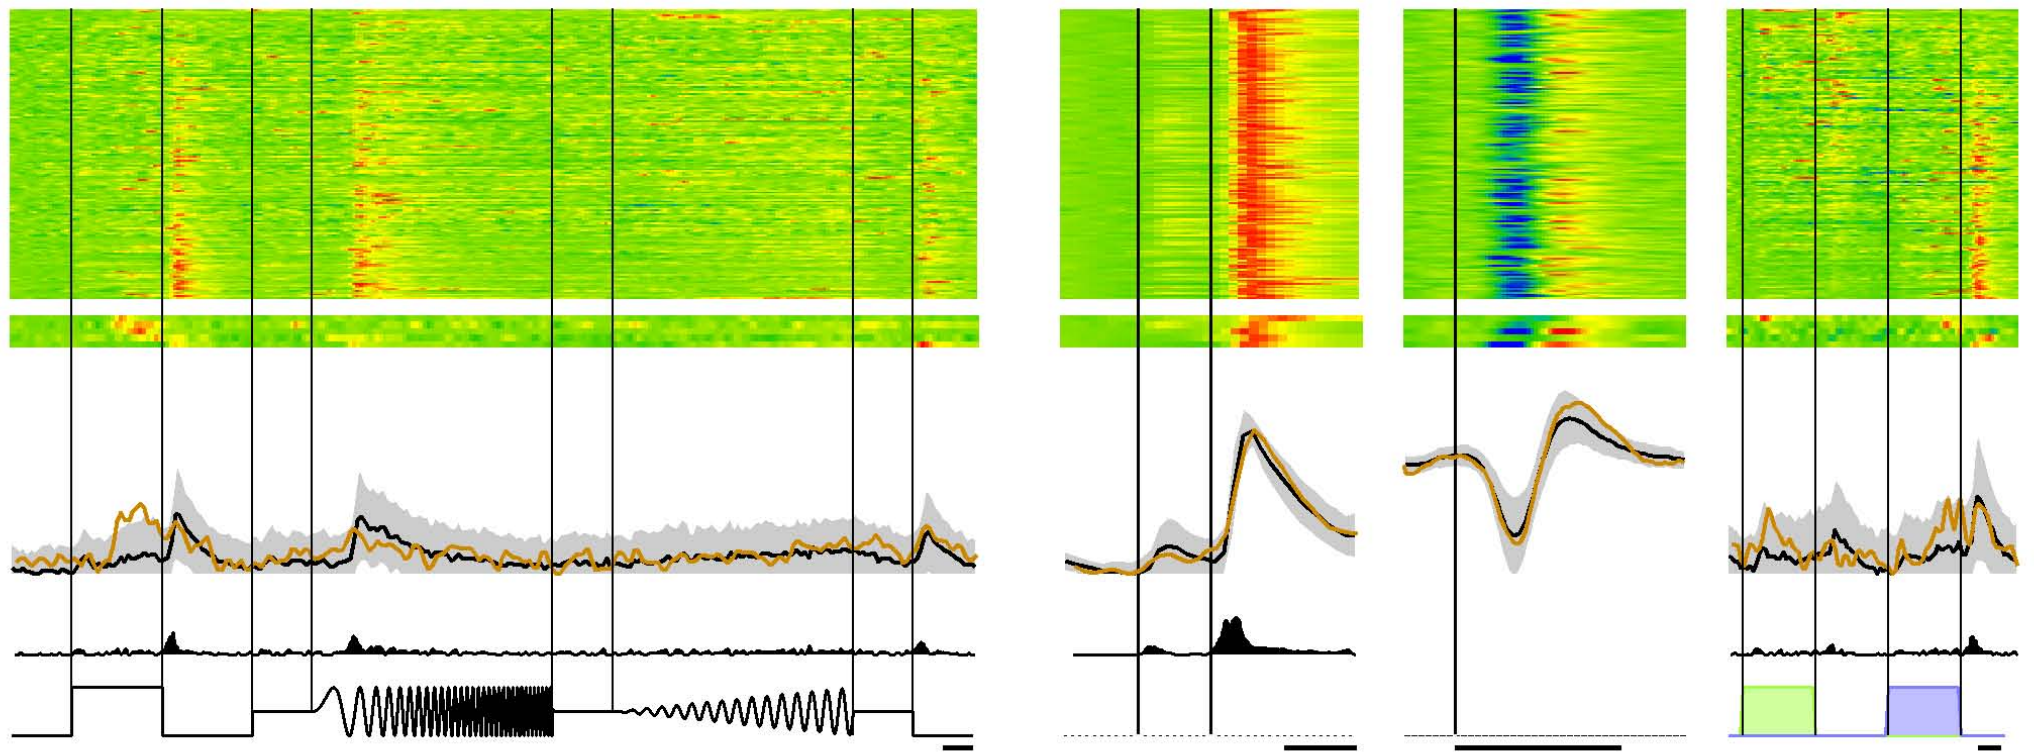

b

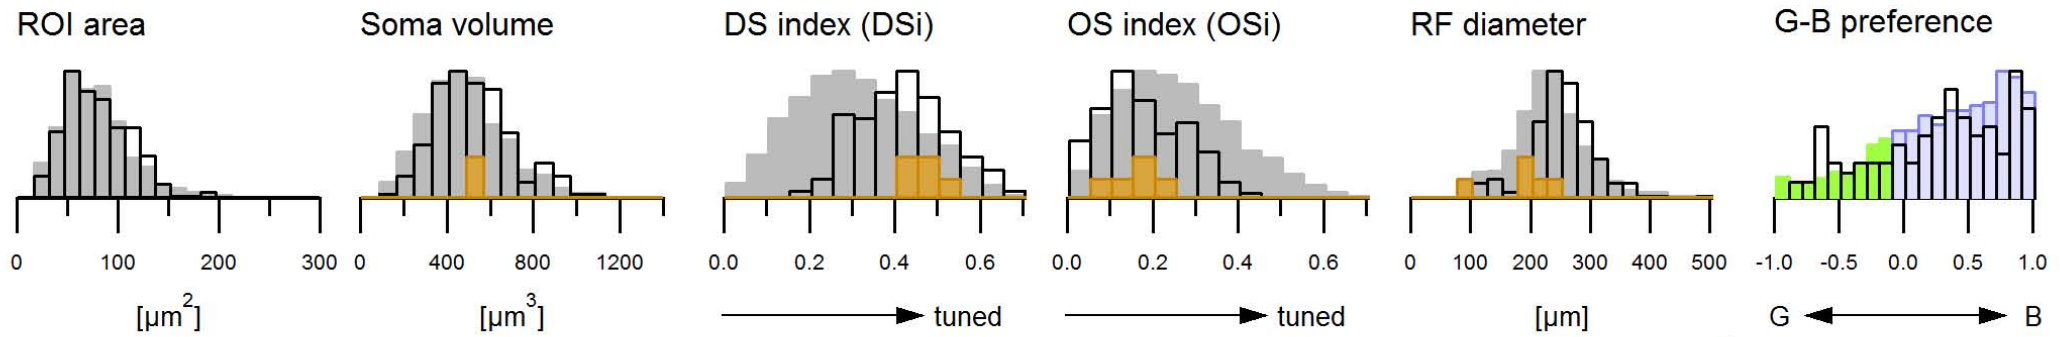

c

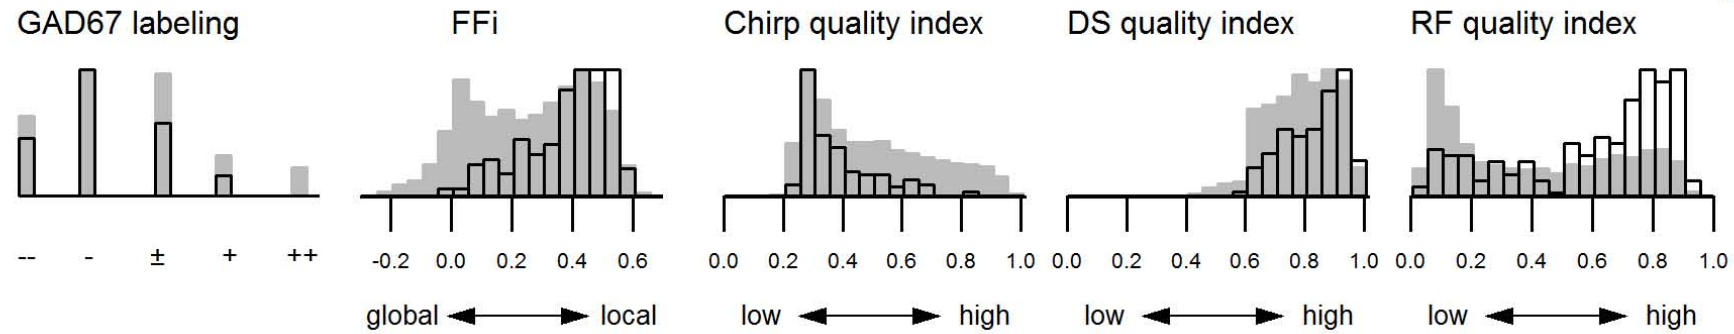

d

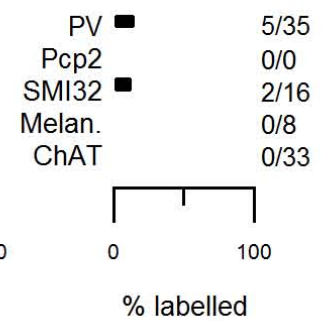

**Group 2 OFF DS**

n = 162 Cells, 3.22%, (3.22% of RGCs); CF: 3.35

SFig. 4-3 a

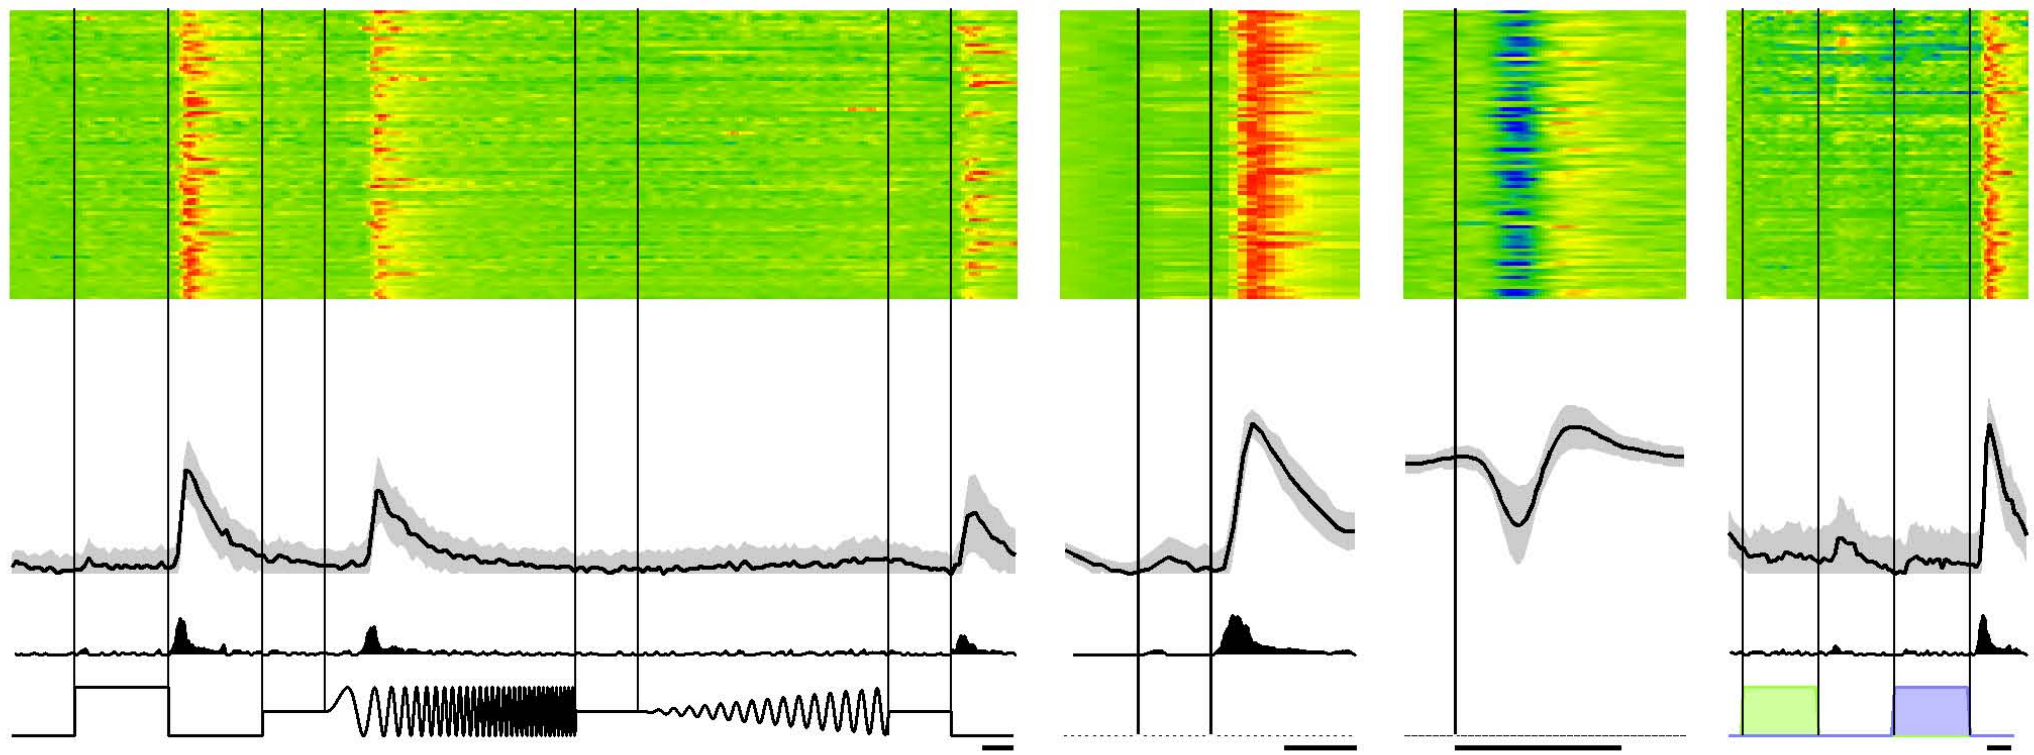

b

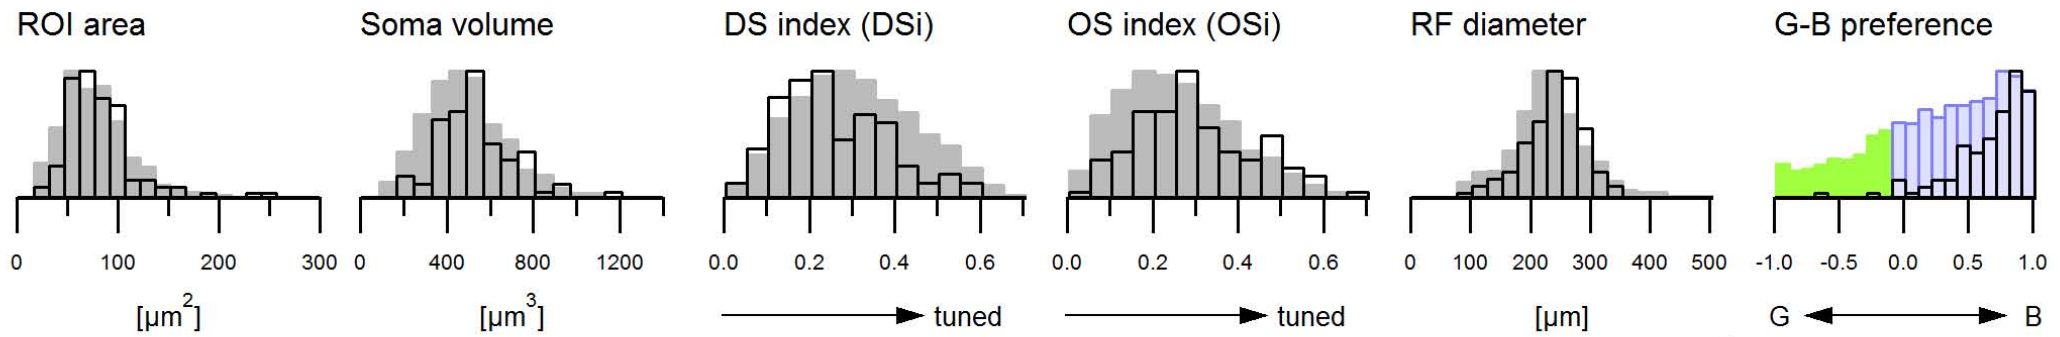

c

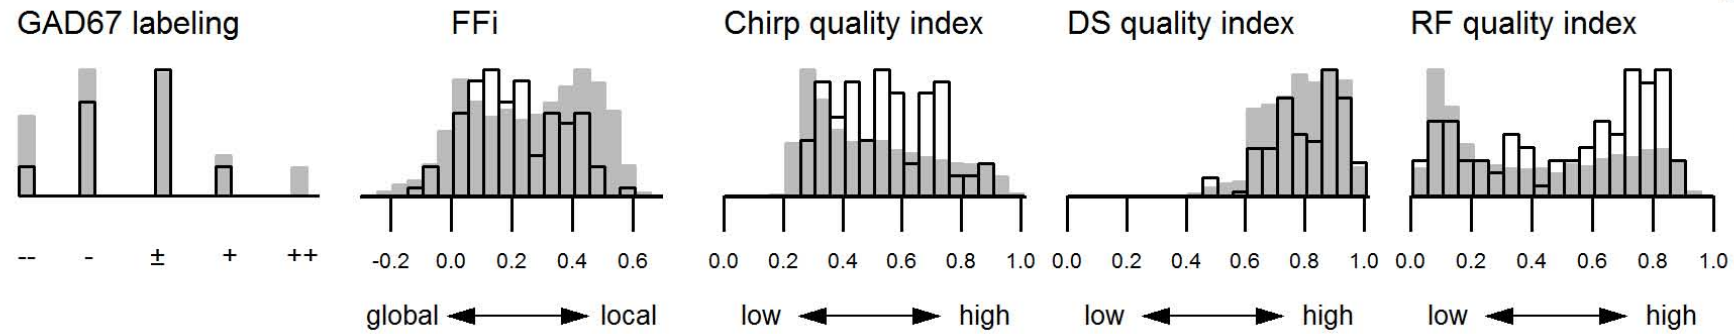

d

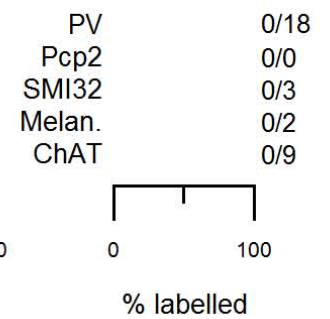

**Group 3** OFF step

n = 86 Cells, 1.71%, (1.71% of RGCs); CF: 1.64

SFig. 4-4 a

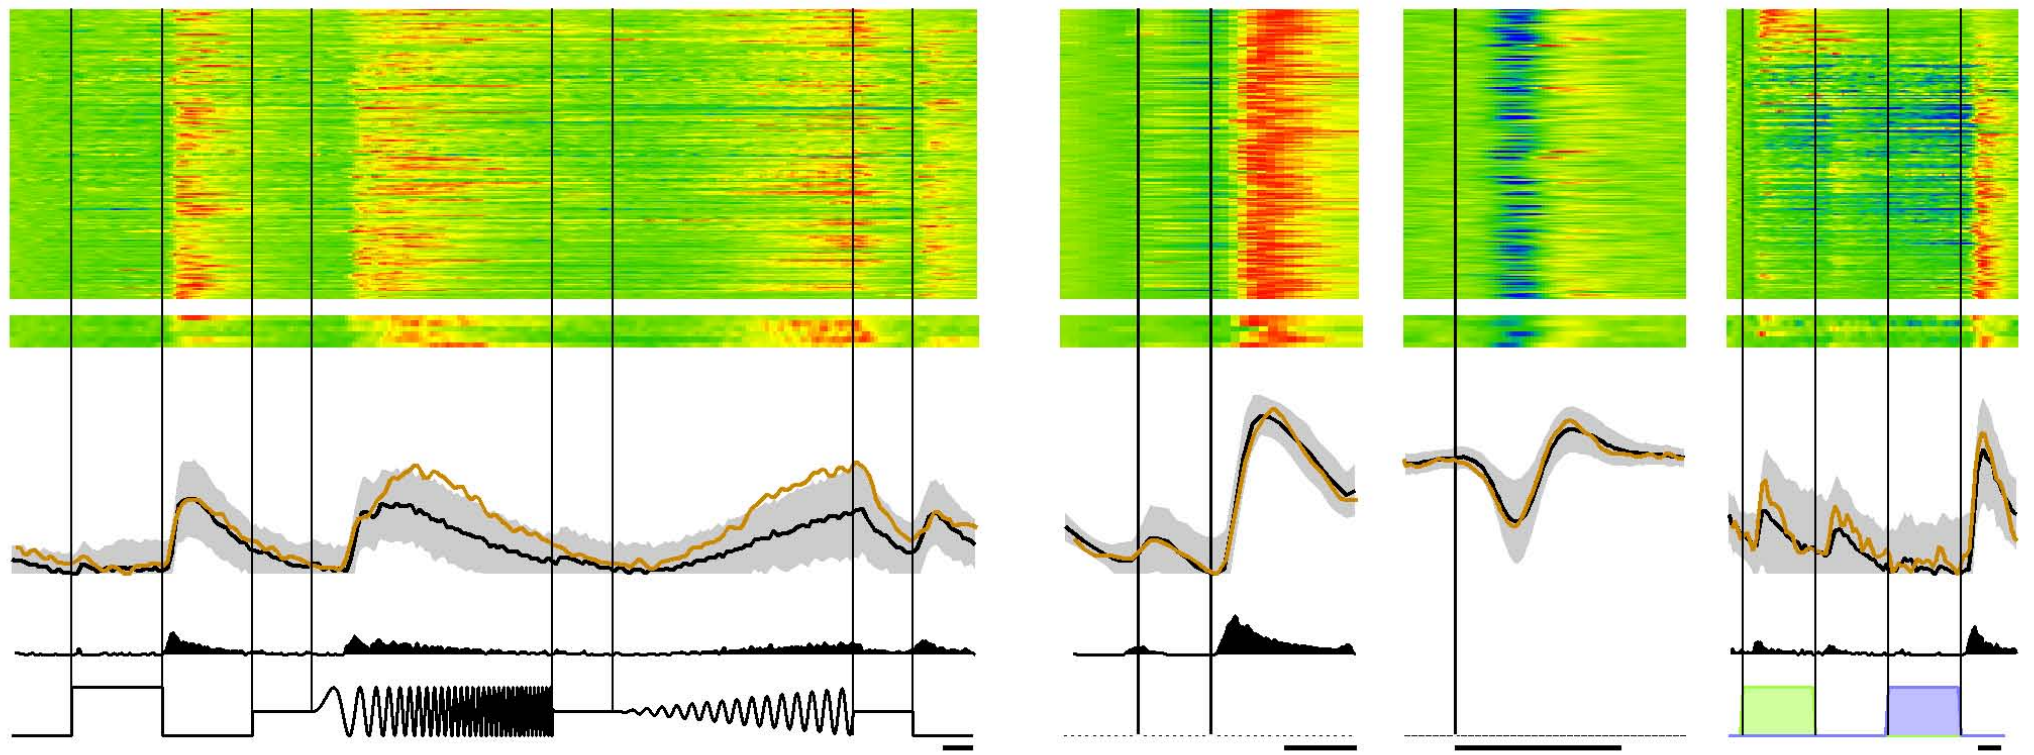

b

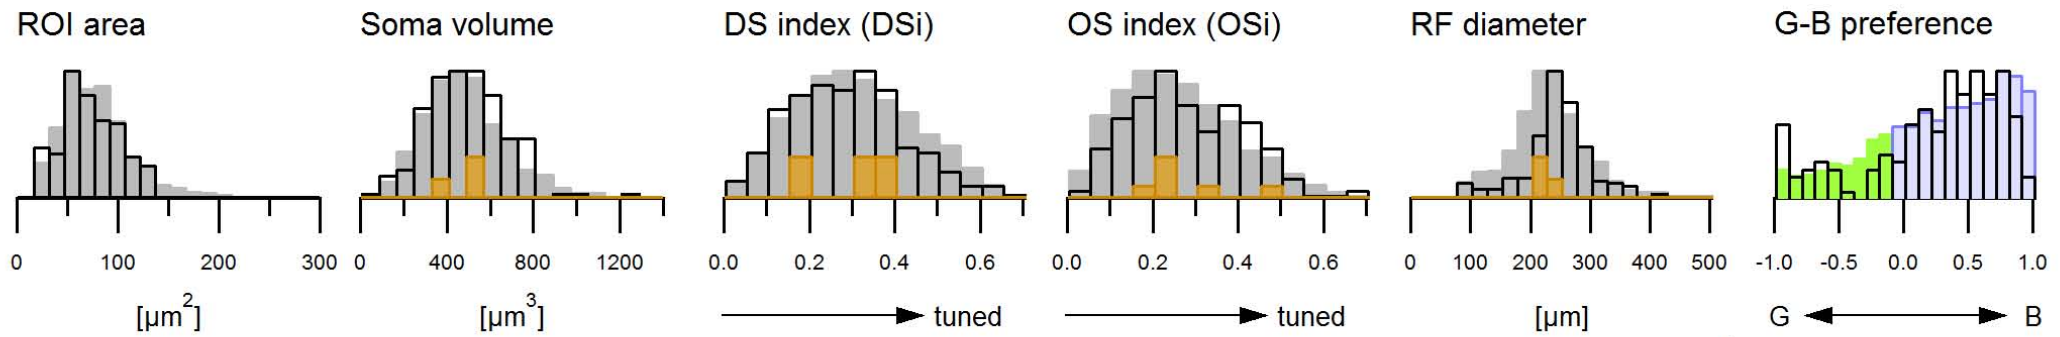

c

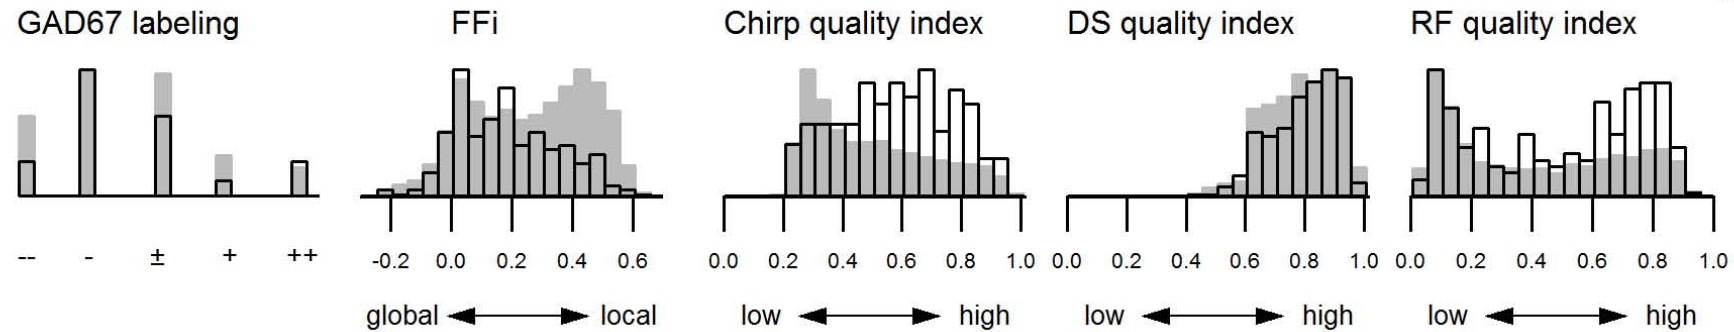

d

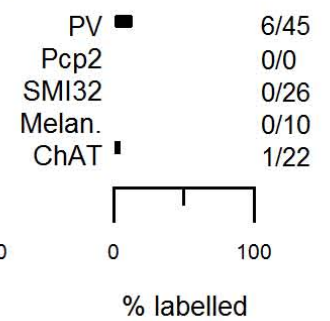

**Group 4** OFF slow (a,b)

n = 186 Cells, 3.7%, (3.7% of RGCs); CF: 3.78

SFig. 4-5 a

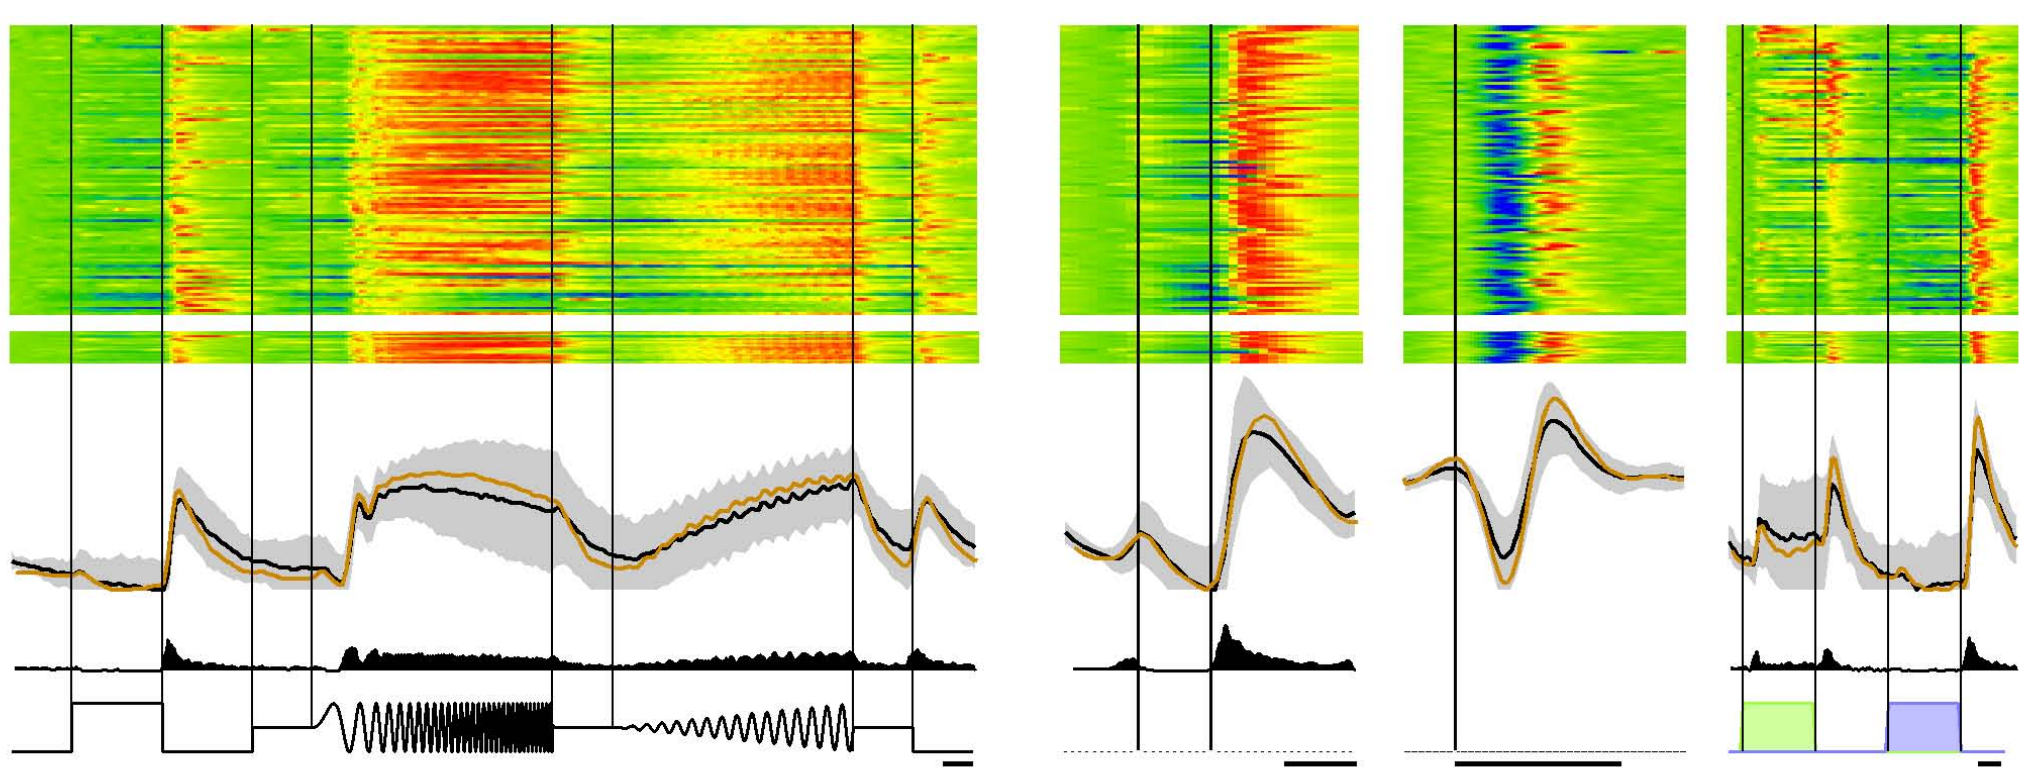

b

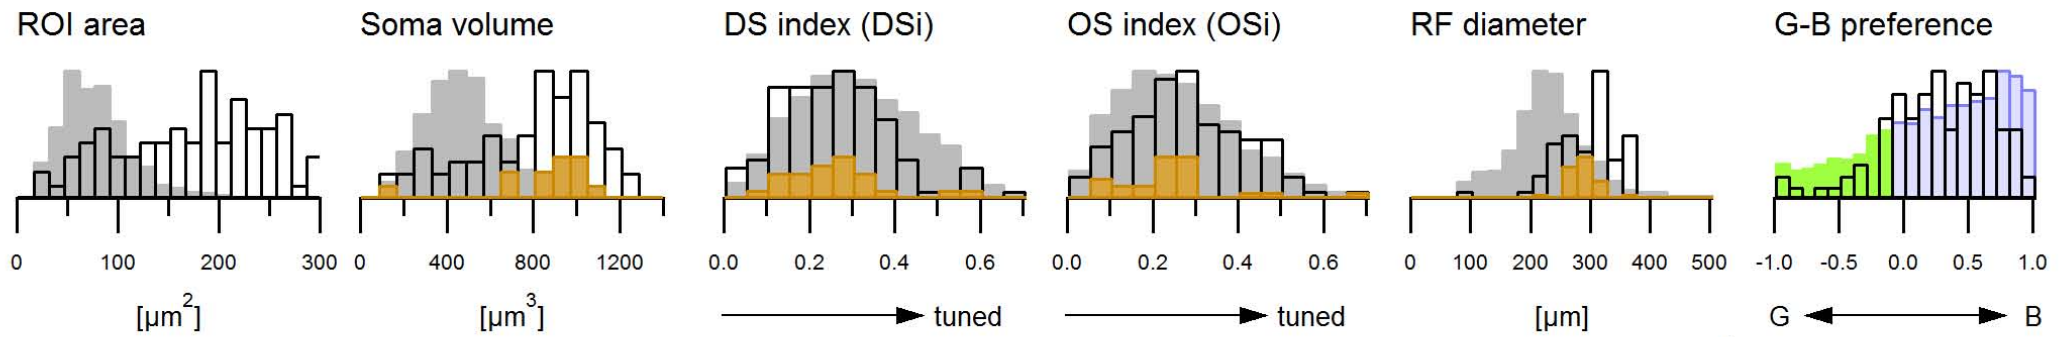

c

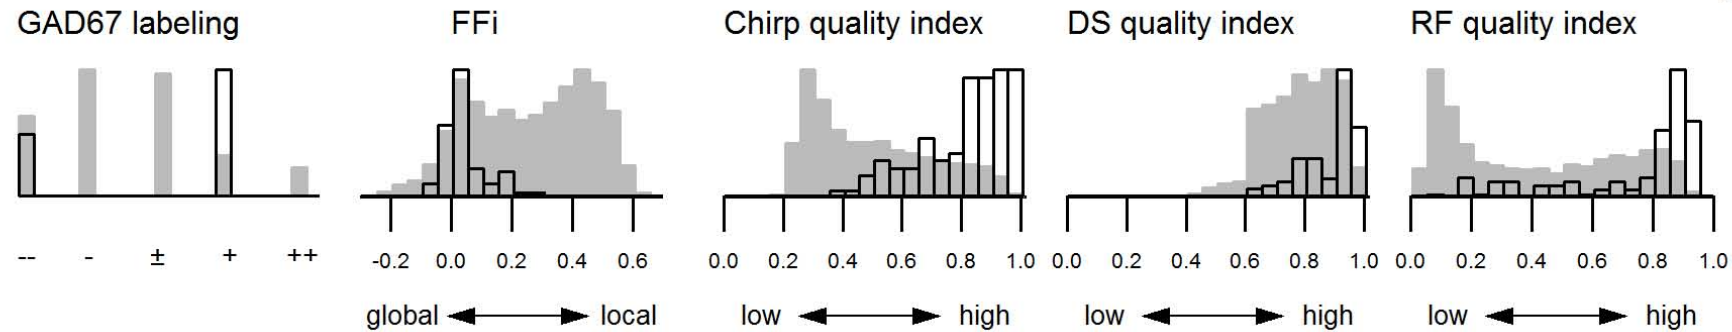

d

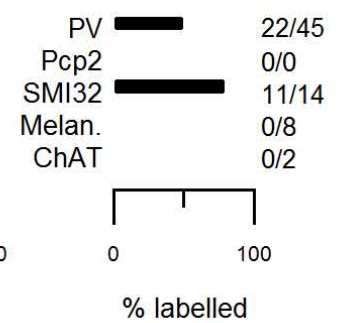

**Group 5** OFF alpha sust. (a-c)  
 n = 103 Cells, 2.05%, (2.05% of RGCs); CF: 2.96

SFig. 4-6 a

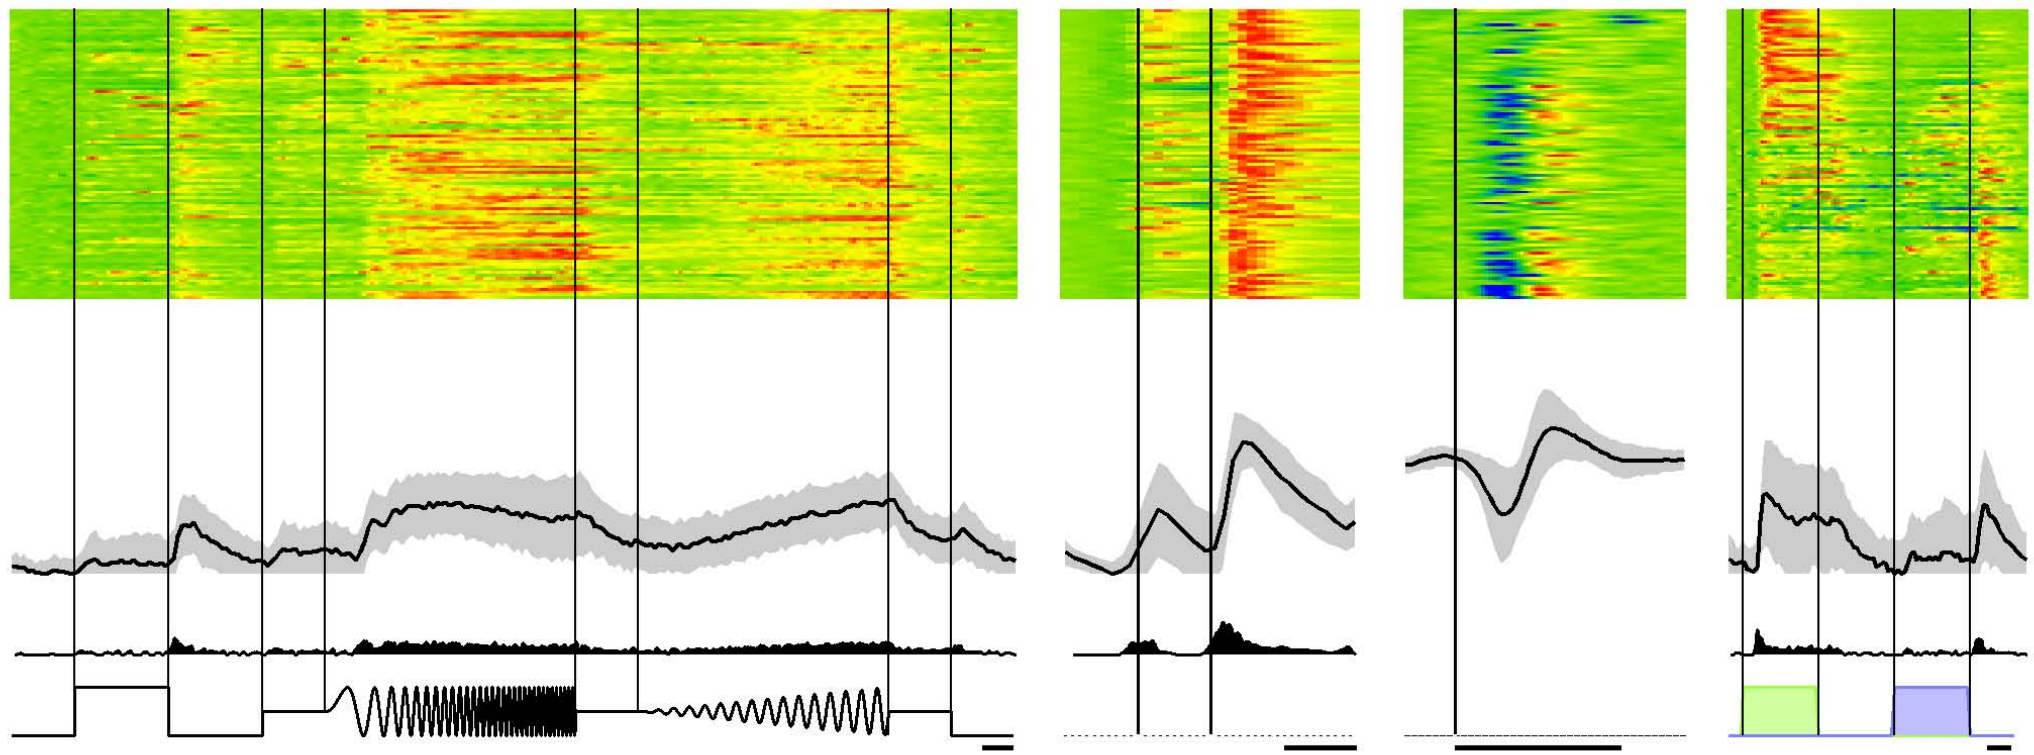

b

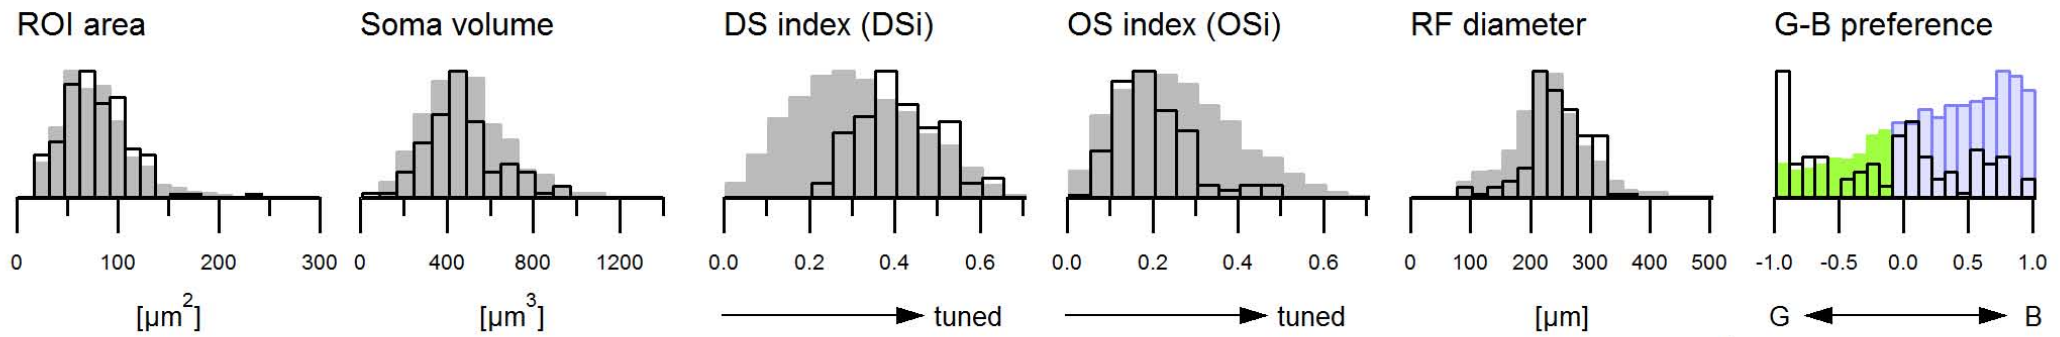

c

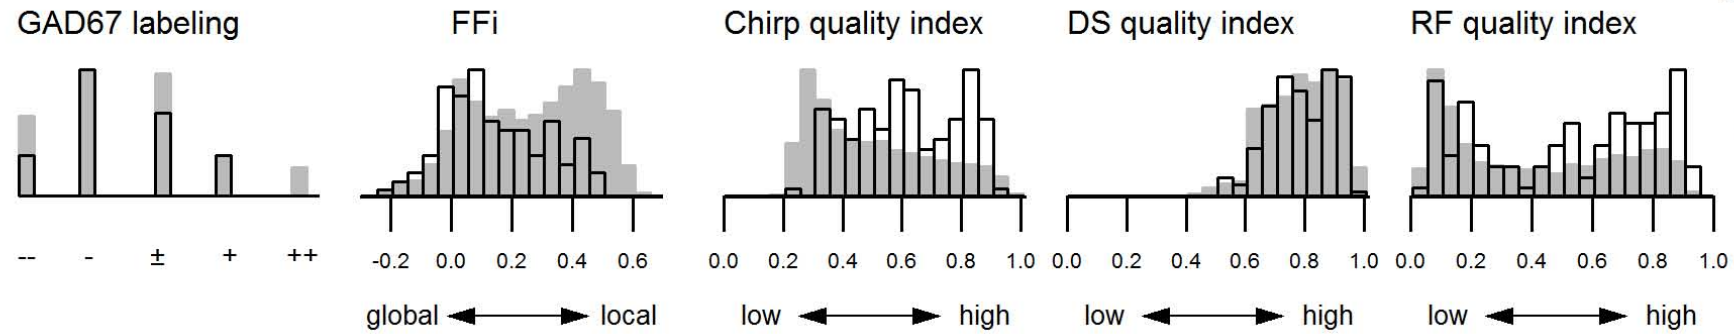

d

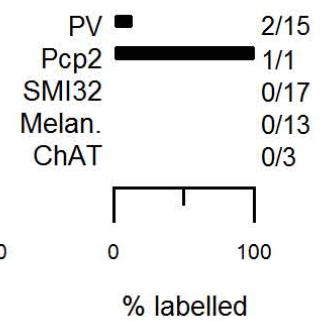

**Group 6** (ON-)OFF "JAM-B" mix  
 n = 104 Cells, 2.07%, (2.07% of RGCs); CF: 2.03

SFig. 4-7 a

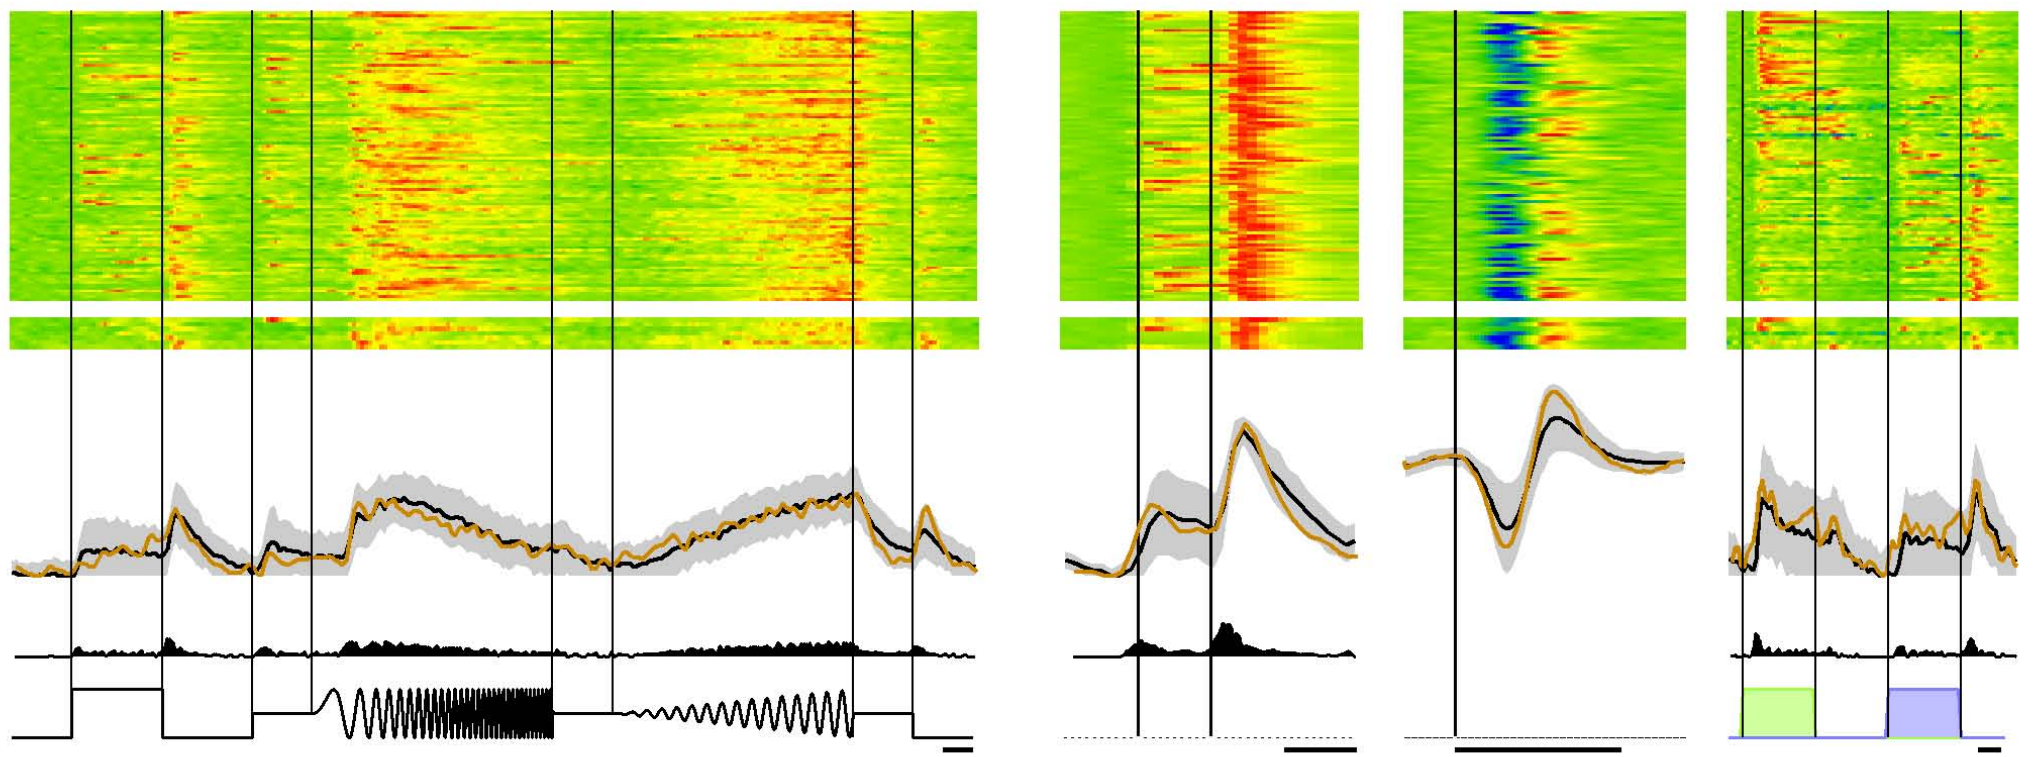

b

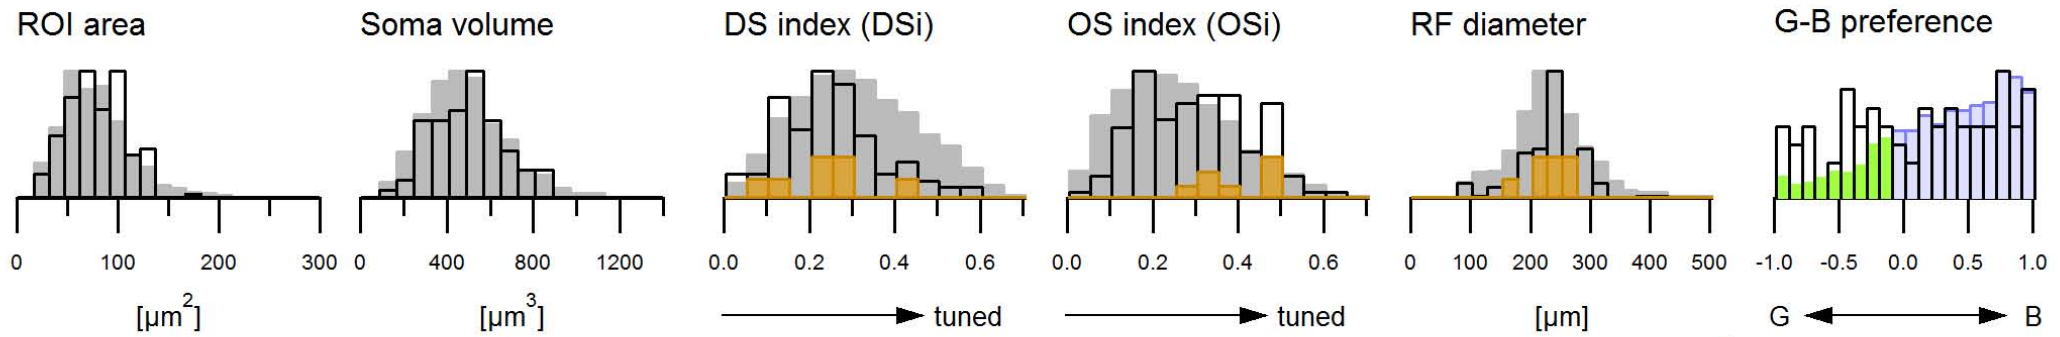

c

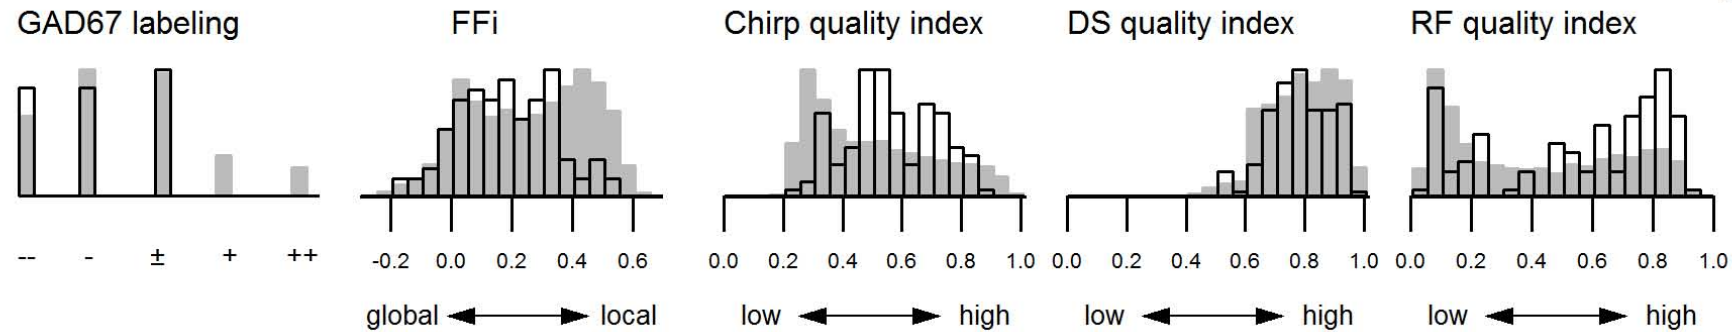

d

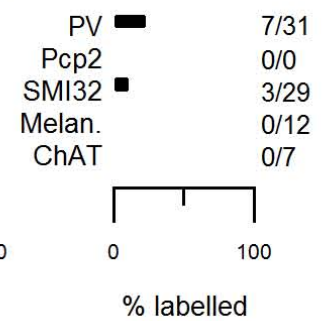

**Group 7** OFF sust.

n = 100 Cells, 1.99%, (1.99% of RGCs); CF: 1.81

SFig. 4-8 a

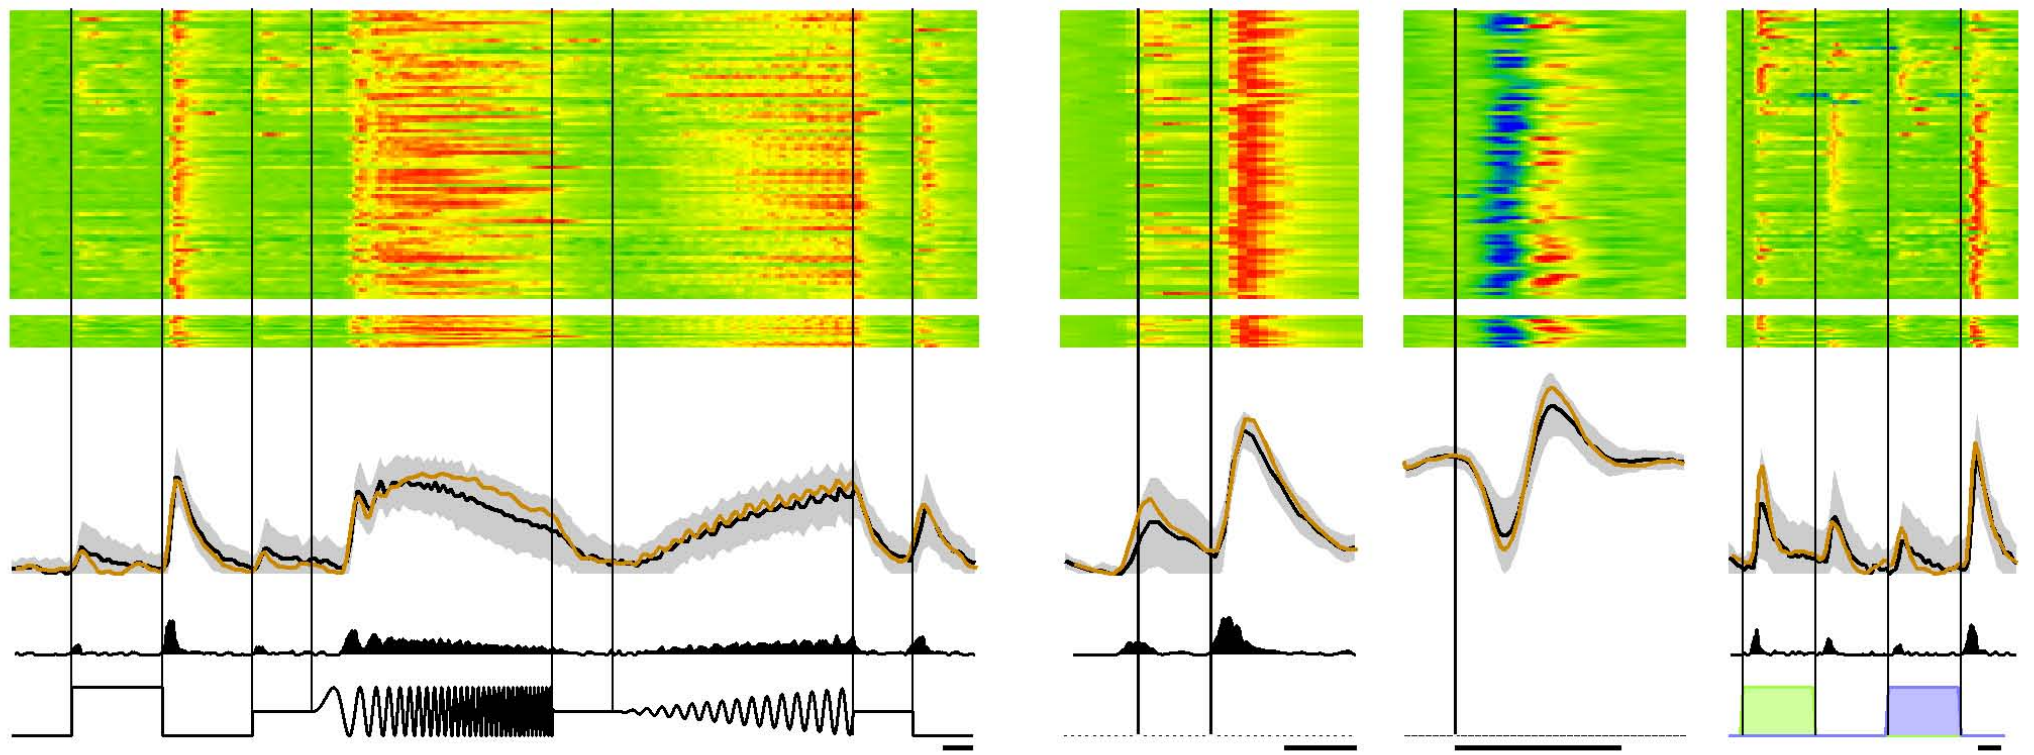

b

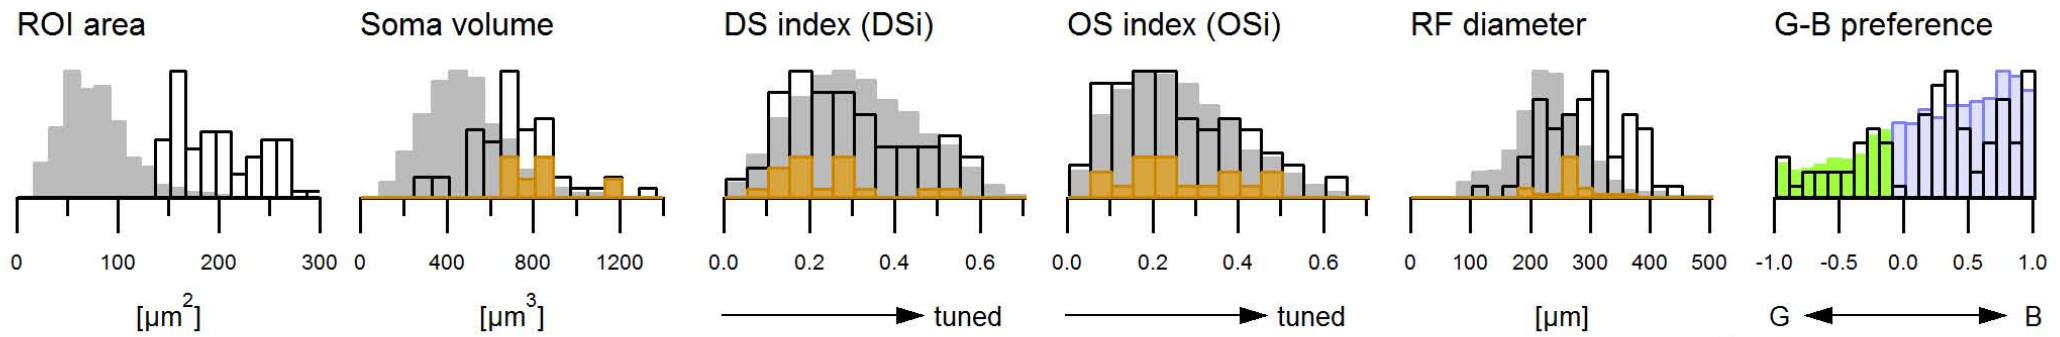

c

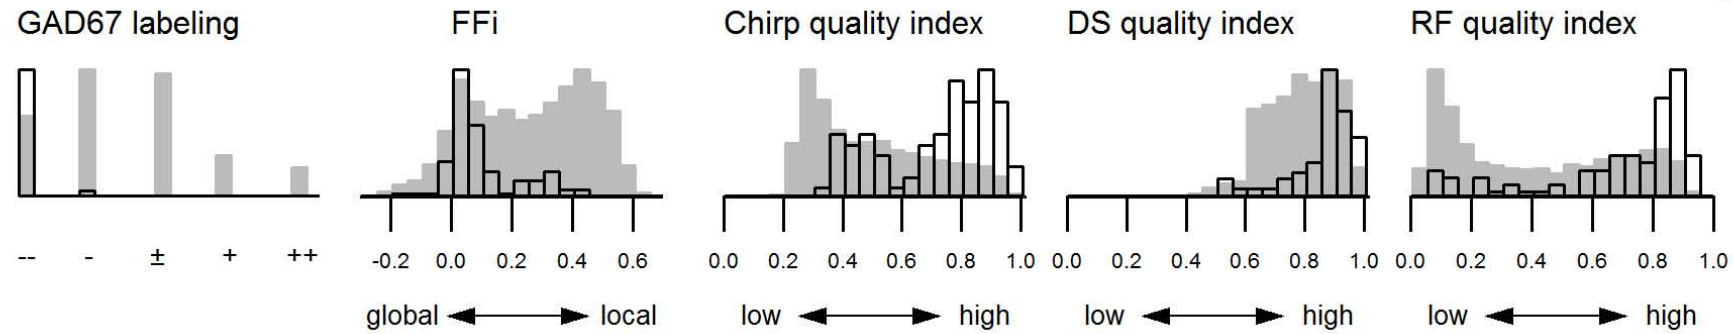

d

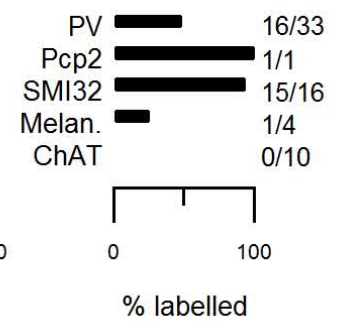

**Group 8** OFF alpha trans. (a,b)  
 n = 80 Cells, 1.59%, (1.59% of RGCs); CF: 2.39



SFig. 4-9 a

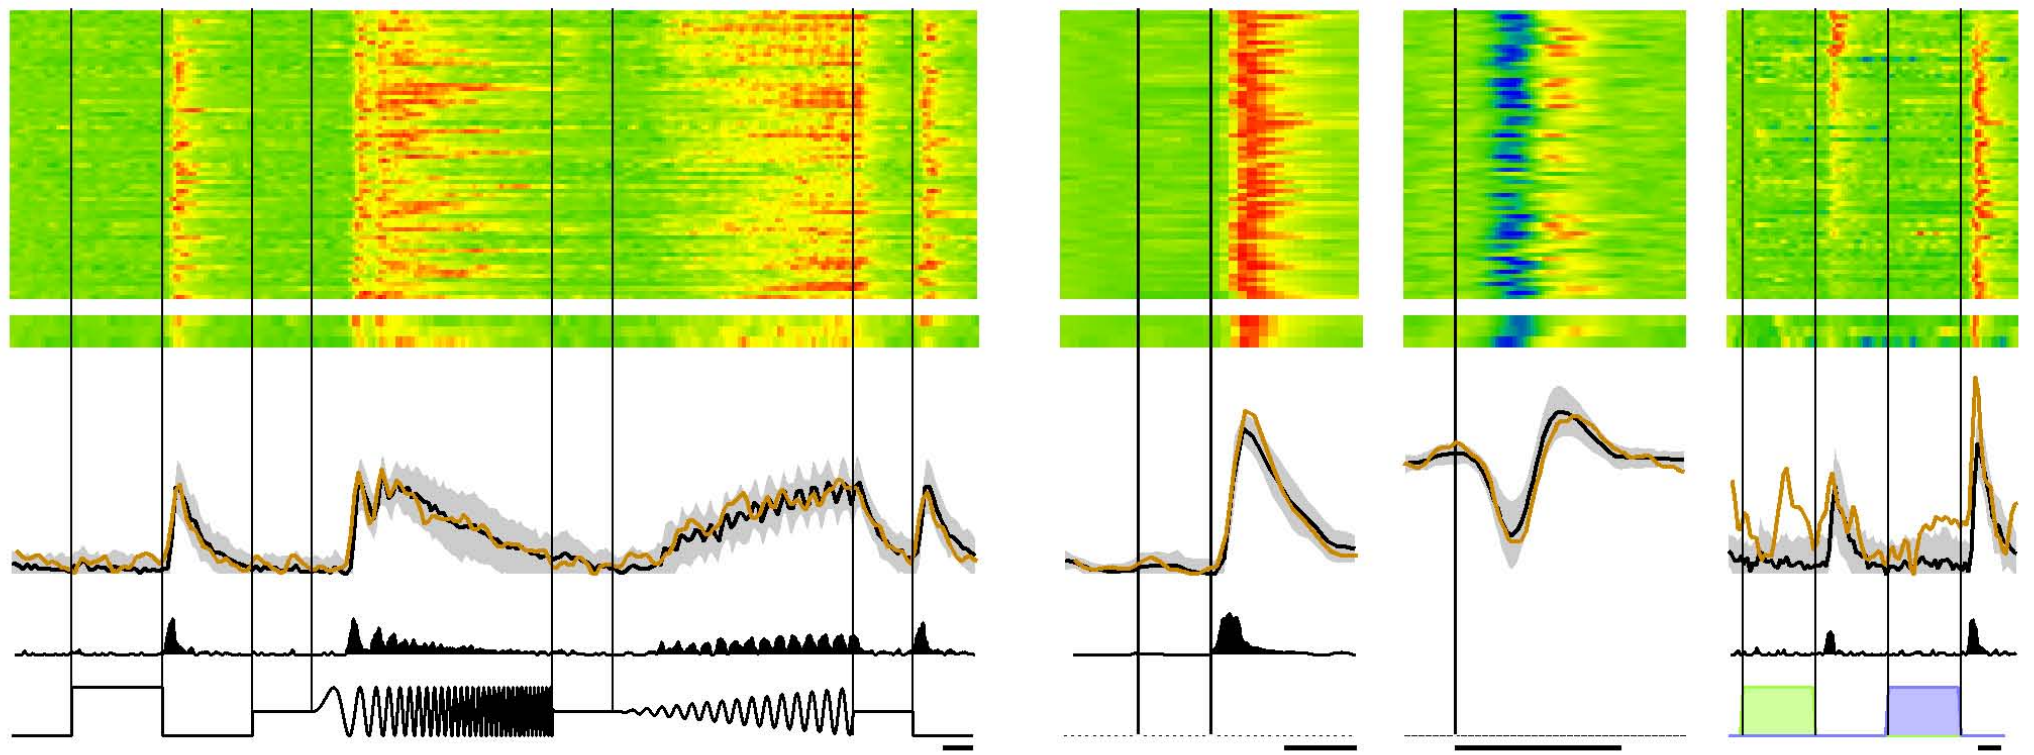

b

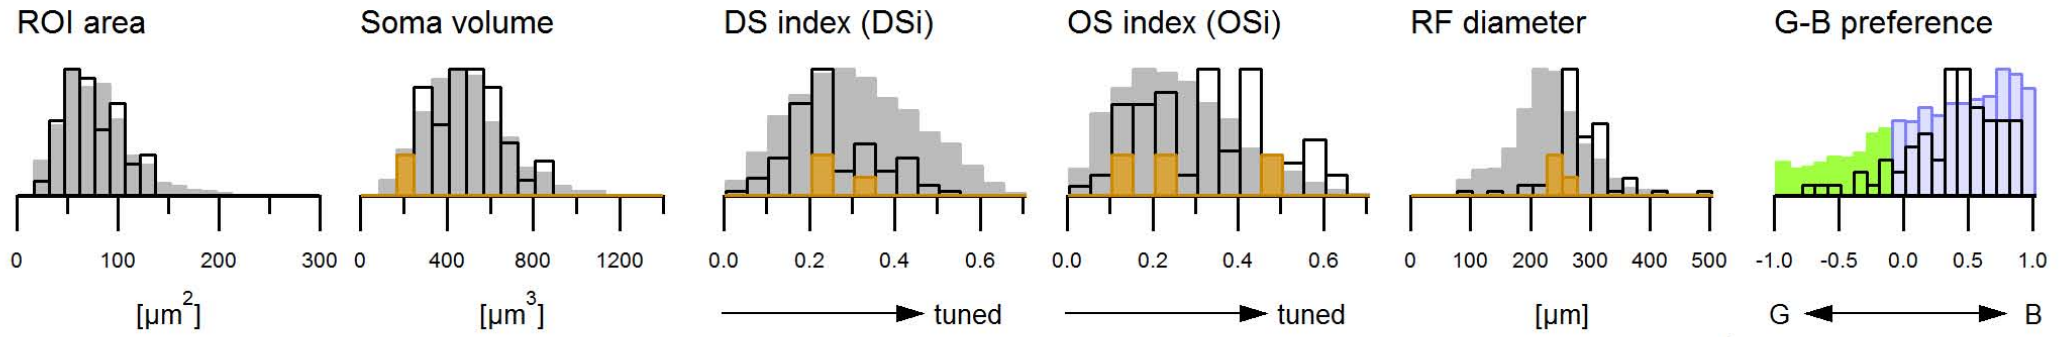

c

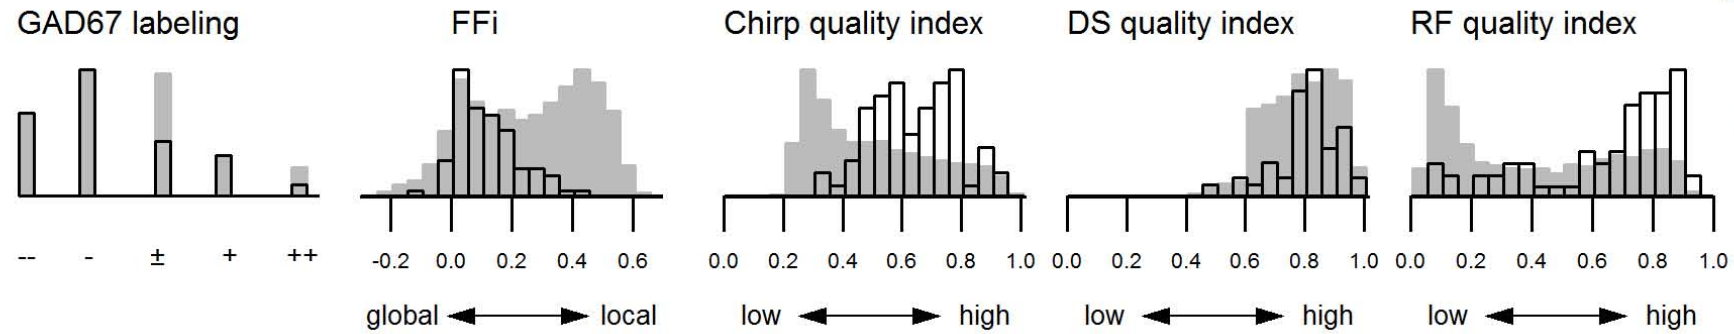

d

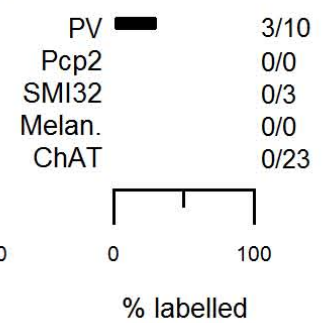

**Group 9** OFF "mini" alpha trans.  
 n = 68 Cells, 1.35%, (1.35% of RGCs); CF: 1.7

SFig. 4-10 a

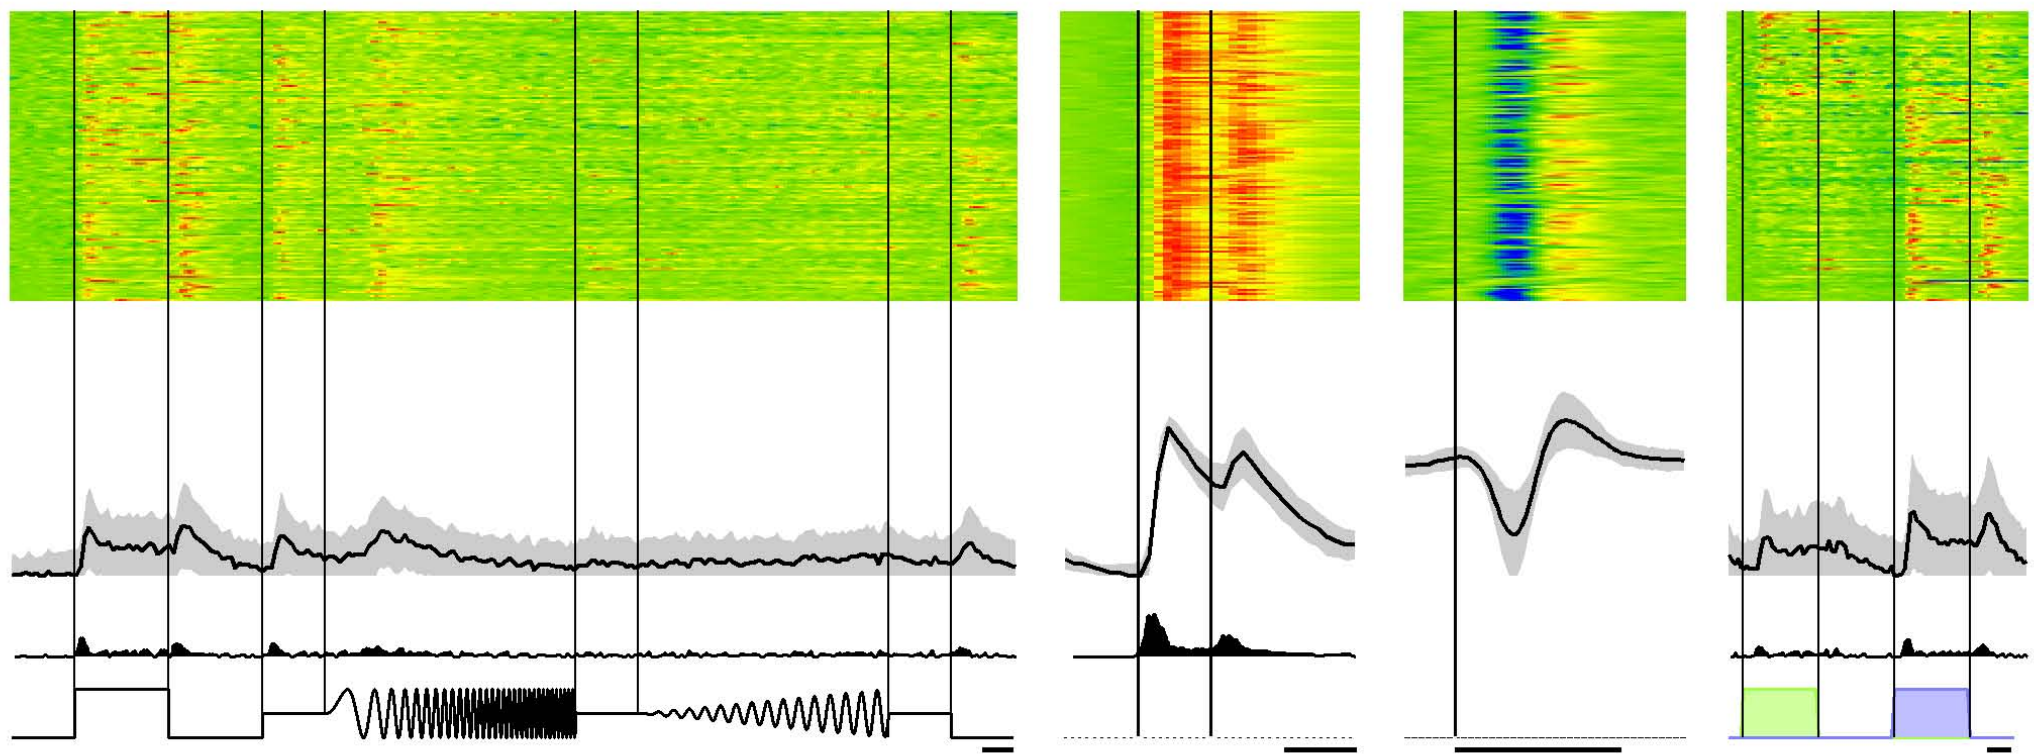

**b**

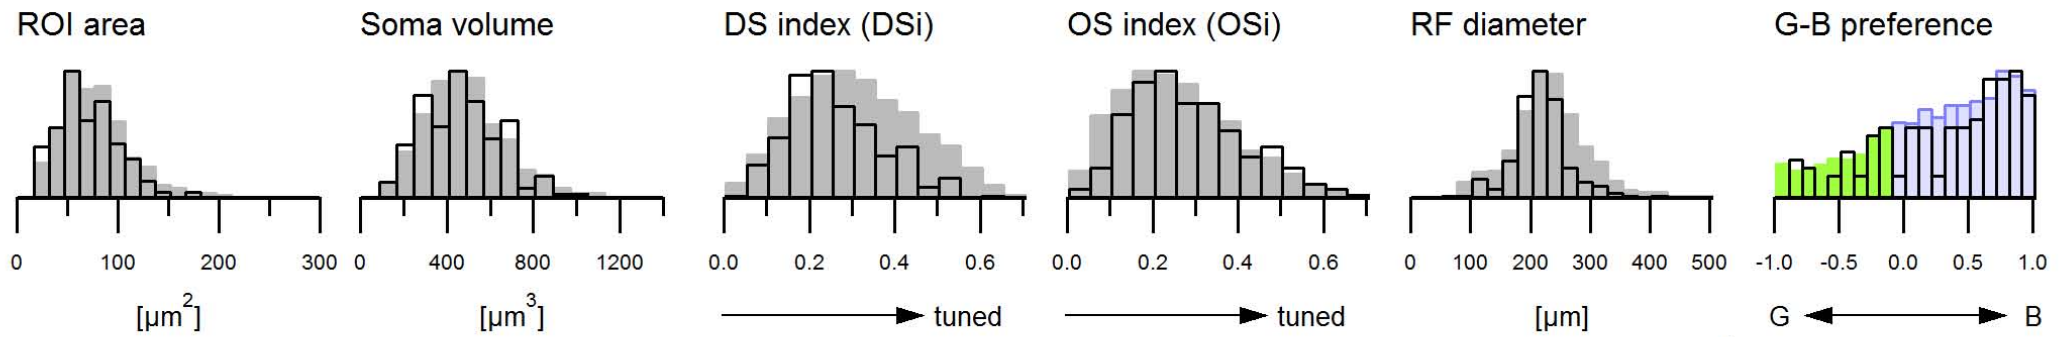

**c**

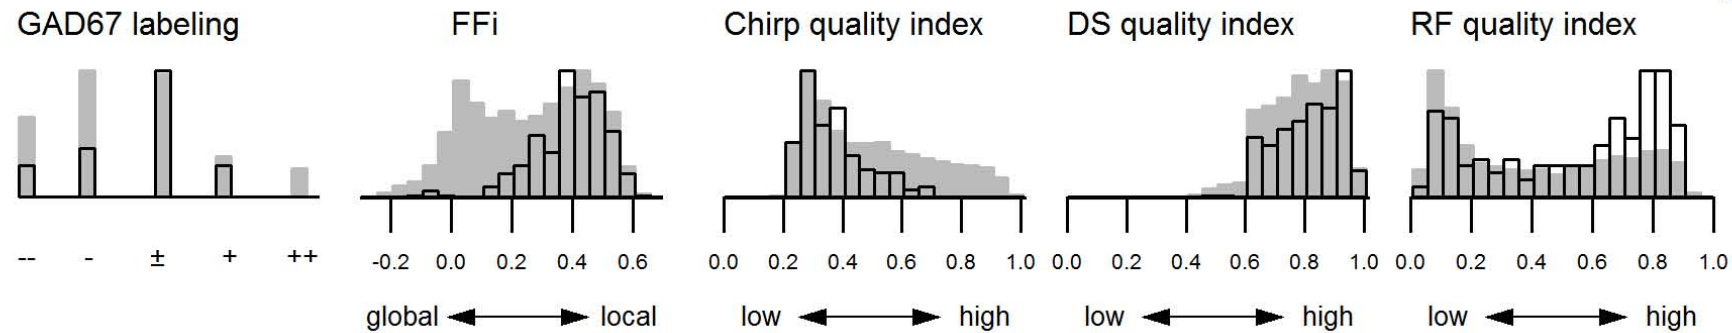

**d**

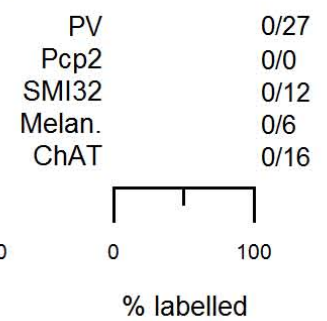

**Group 10 ON-OFF local-edge "W3"**  
 n = 149 Cells, 2.97%, (2.97% of RGCs); CF: 2.35

SFig. 4-11 a

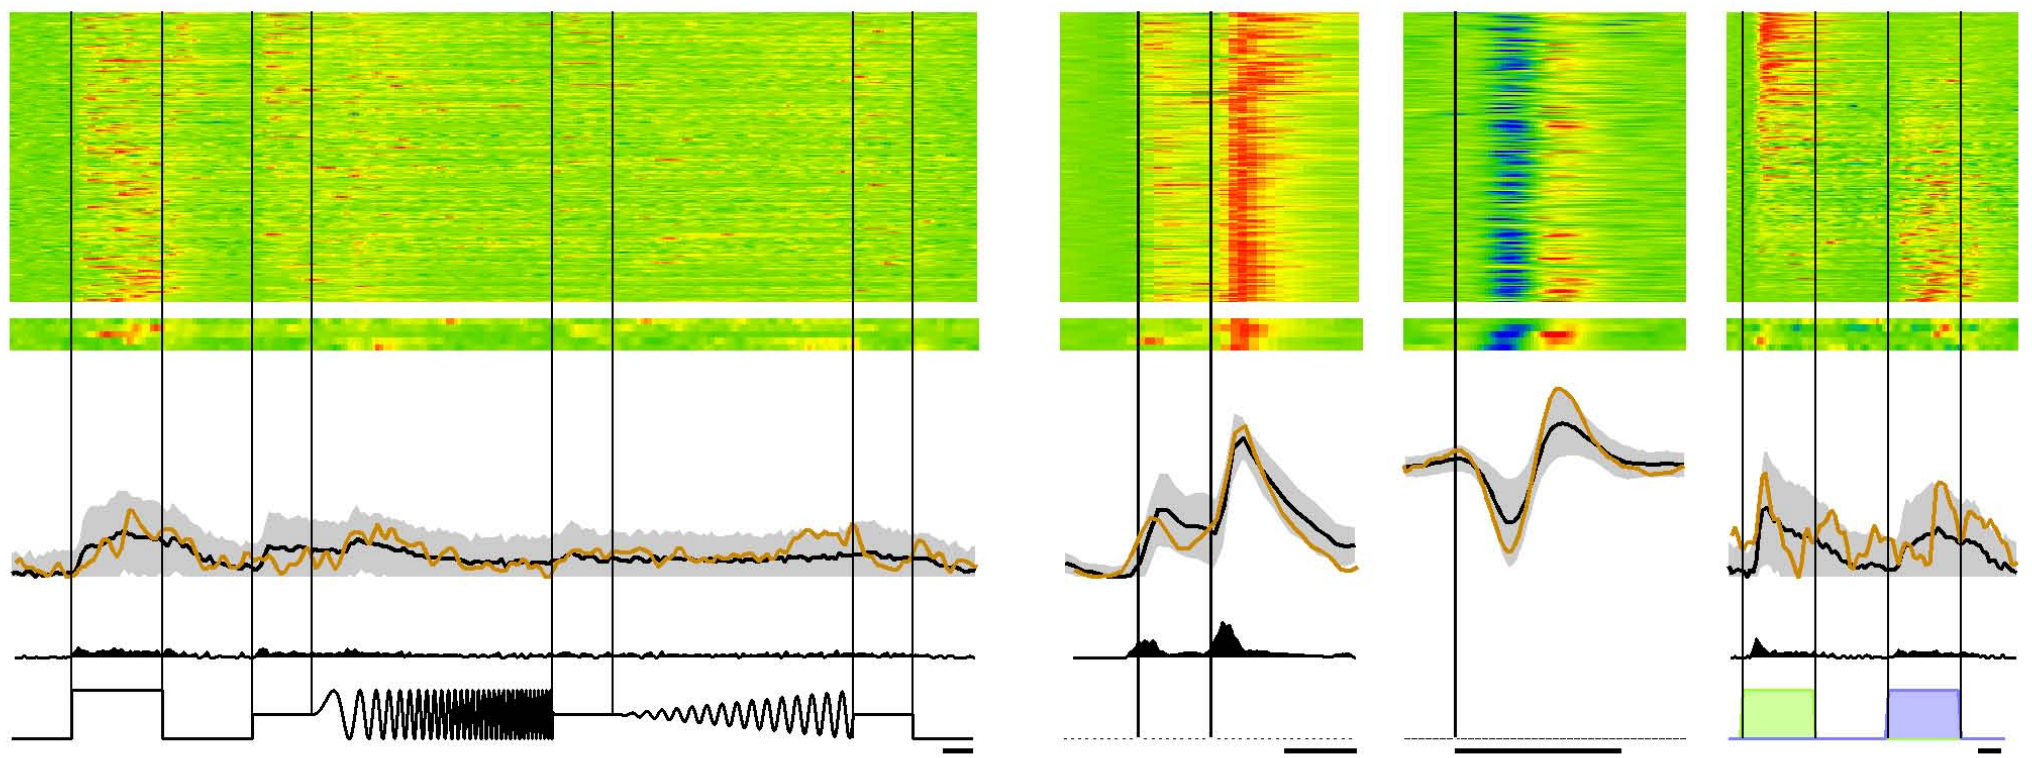

b

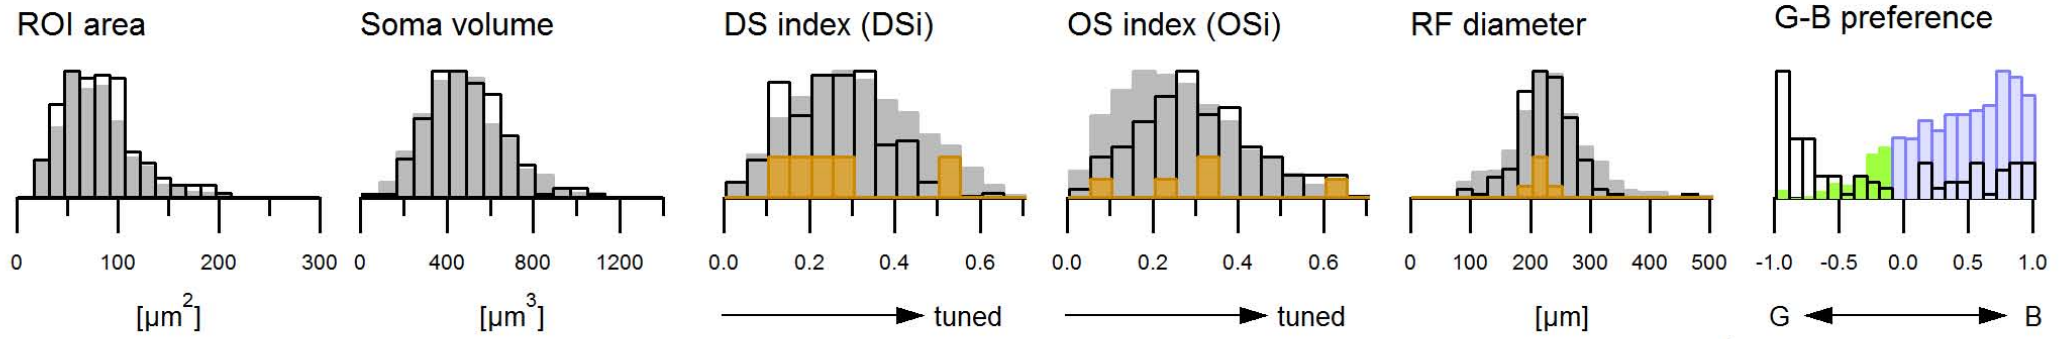

c

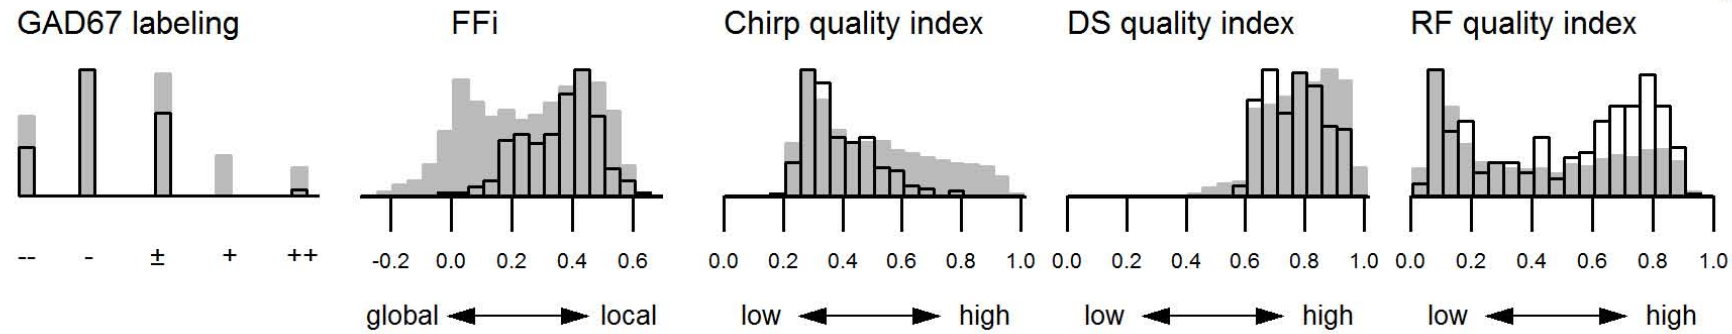

d

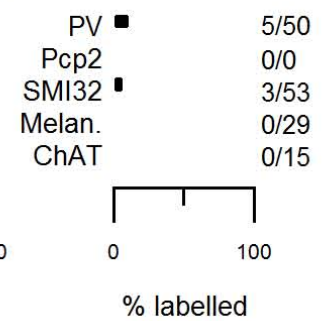

**Group 11 ON-OFF local (a,b)**

n = 217 Cells, 4.32%, (4.32% of RGCs); CF: 3.48

SFig. 4-12 a

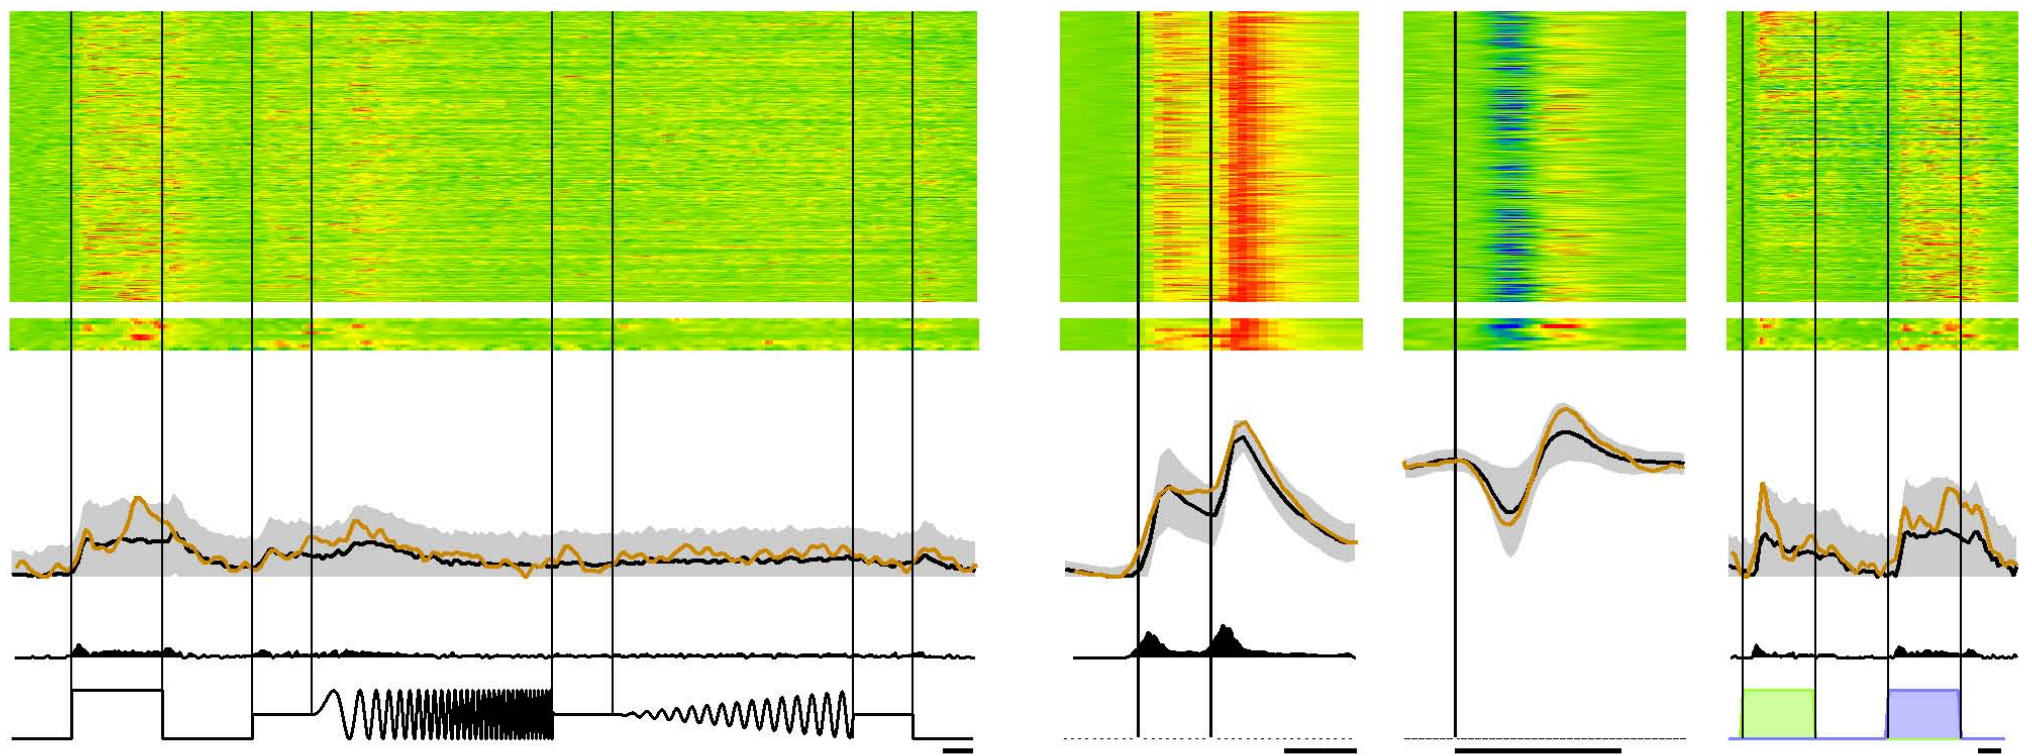

**b**

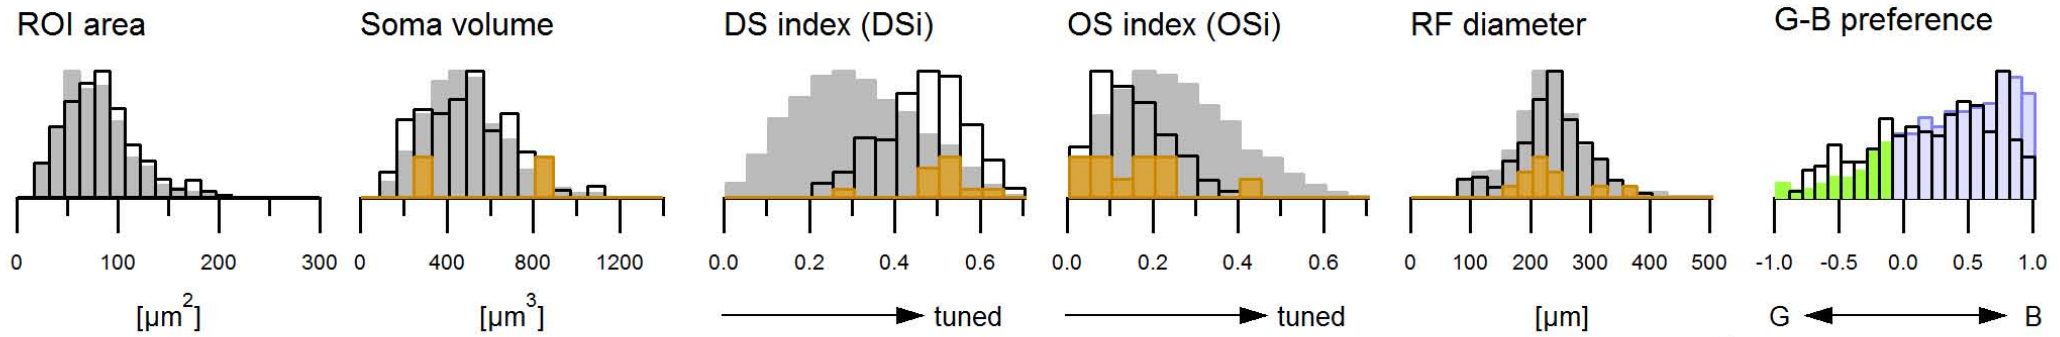

**c**

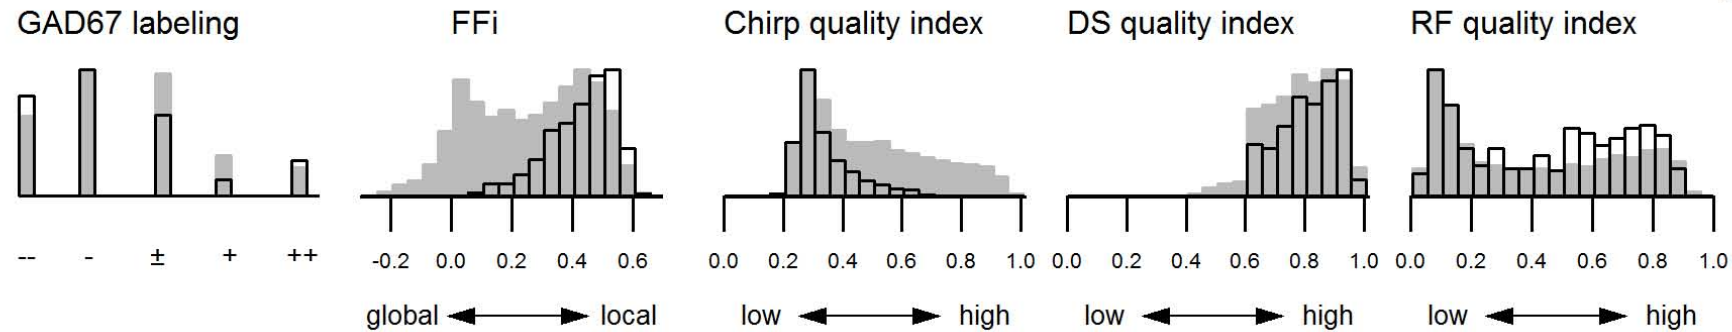

**d**

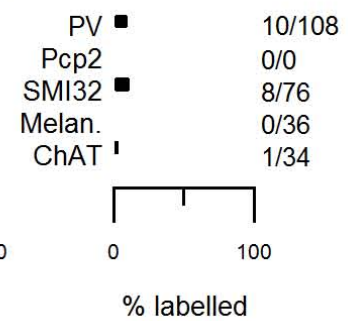

**Group 12 ON-OFF DS 1 (a,b)**

n = 397 Cells, 7.9%, (7.9% of RGCs); CF: 7.75

SFig. 4-13 a

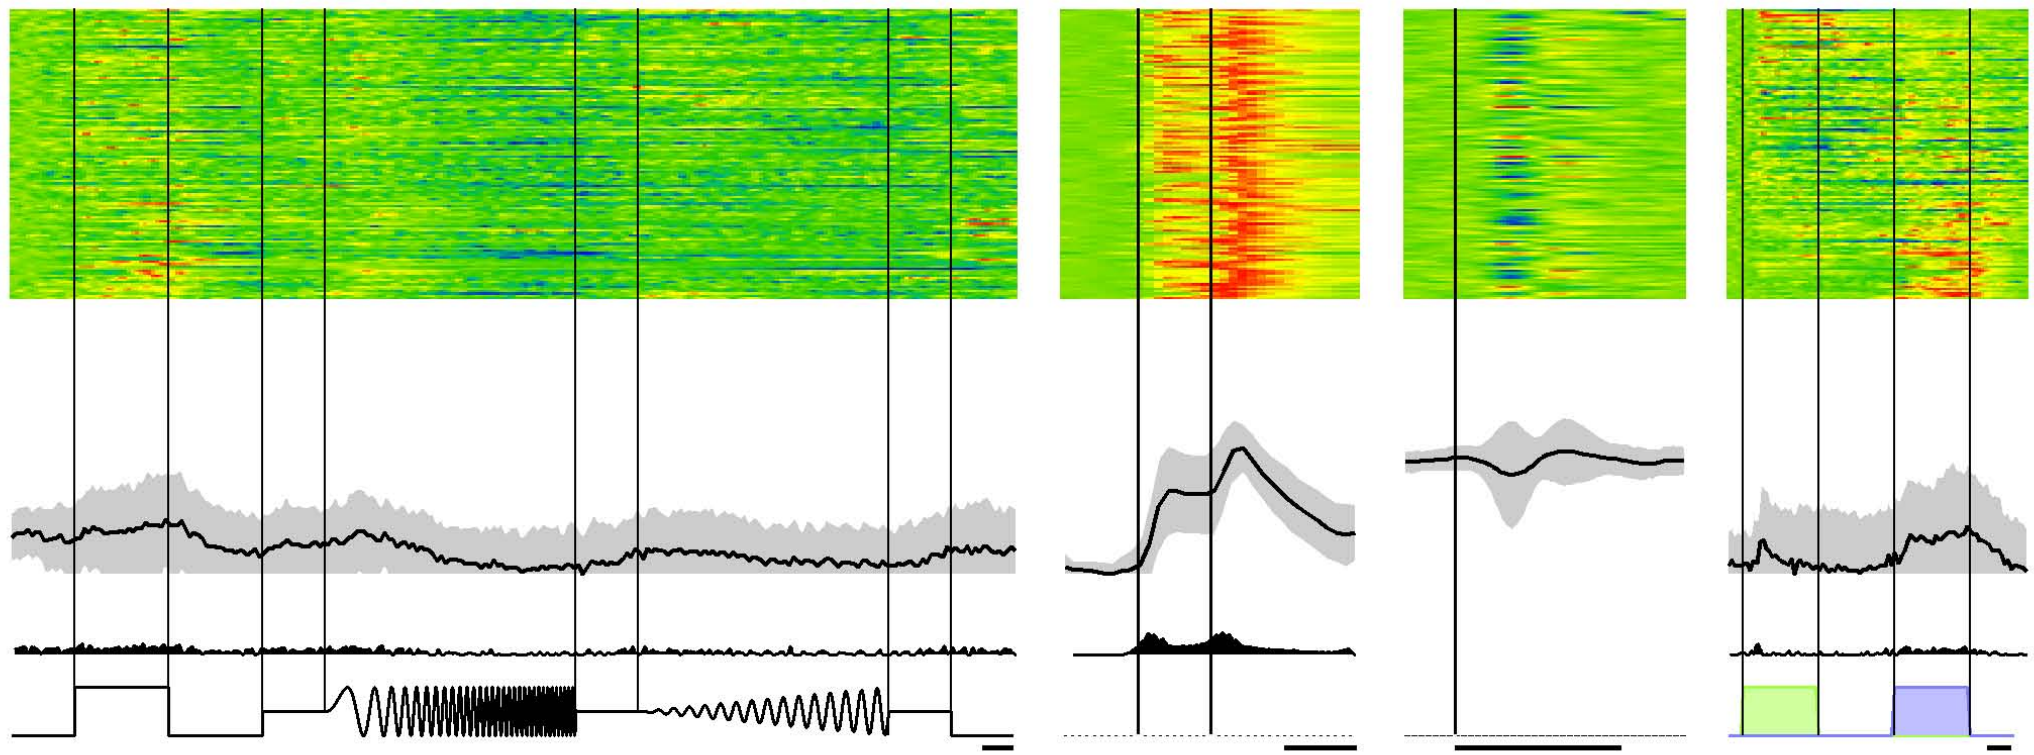

**b**

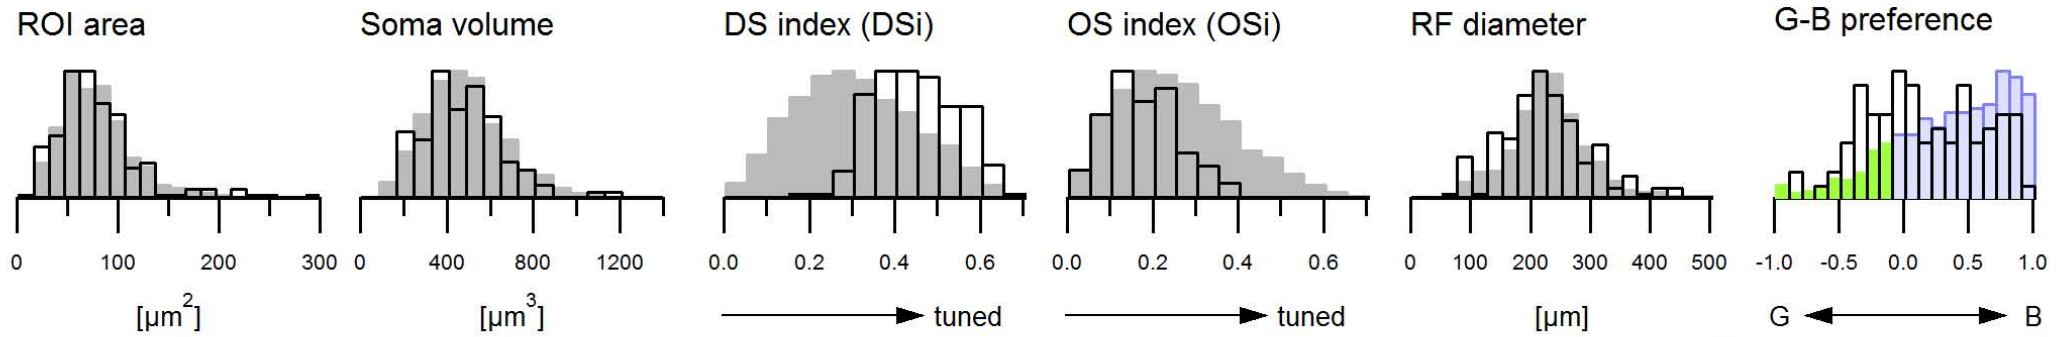

**c**

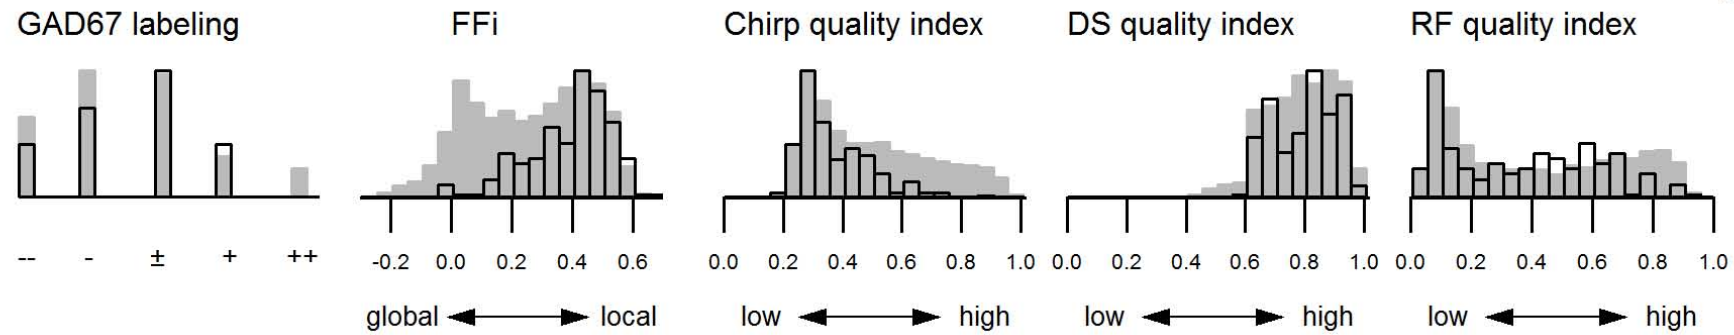

**d**

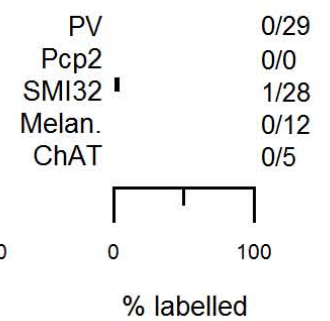

**Group 13 ON-OFF DS 2**

n = 129 Cells, 2.57%, (2.57% of RGCs); CF: 2.3

SFig. 4-14 a

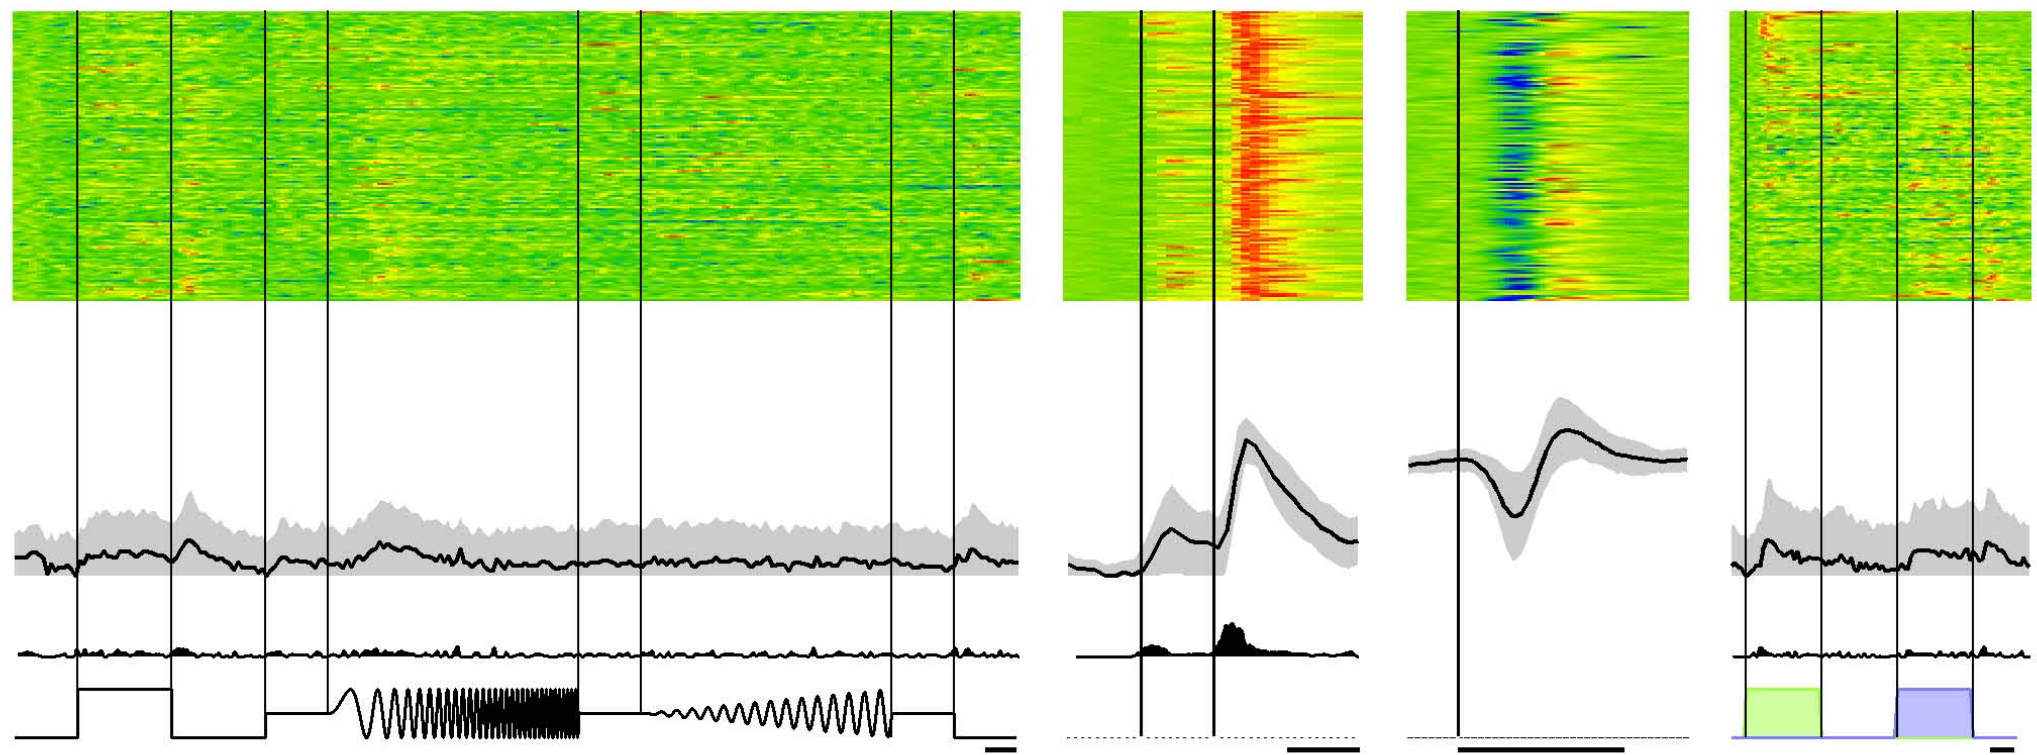

**b**

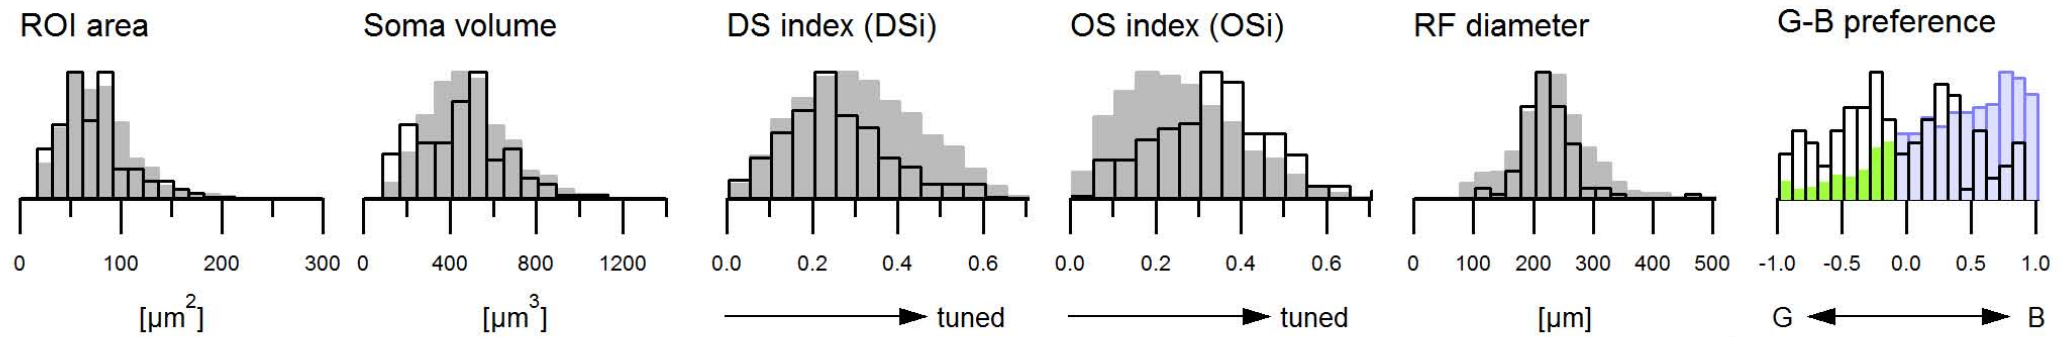

**c**

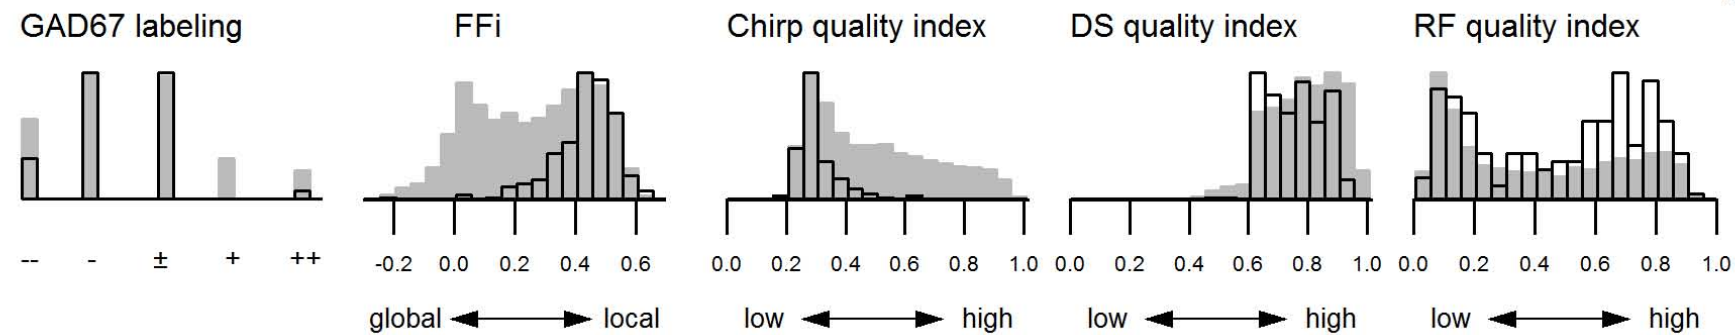

**d**

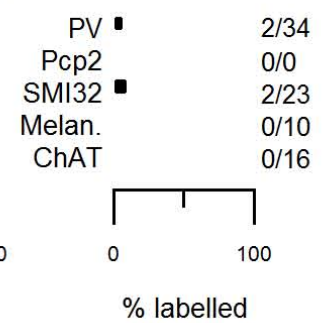

**Group 14** (ON-)OFF local, OS

n = 150 Cells, 2.99%, (2.99% of RGCs); CF: 2.44

SFig. 4-15 a

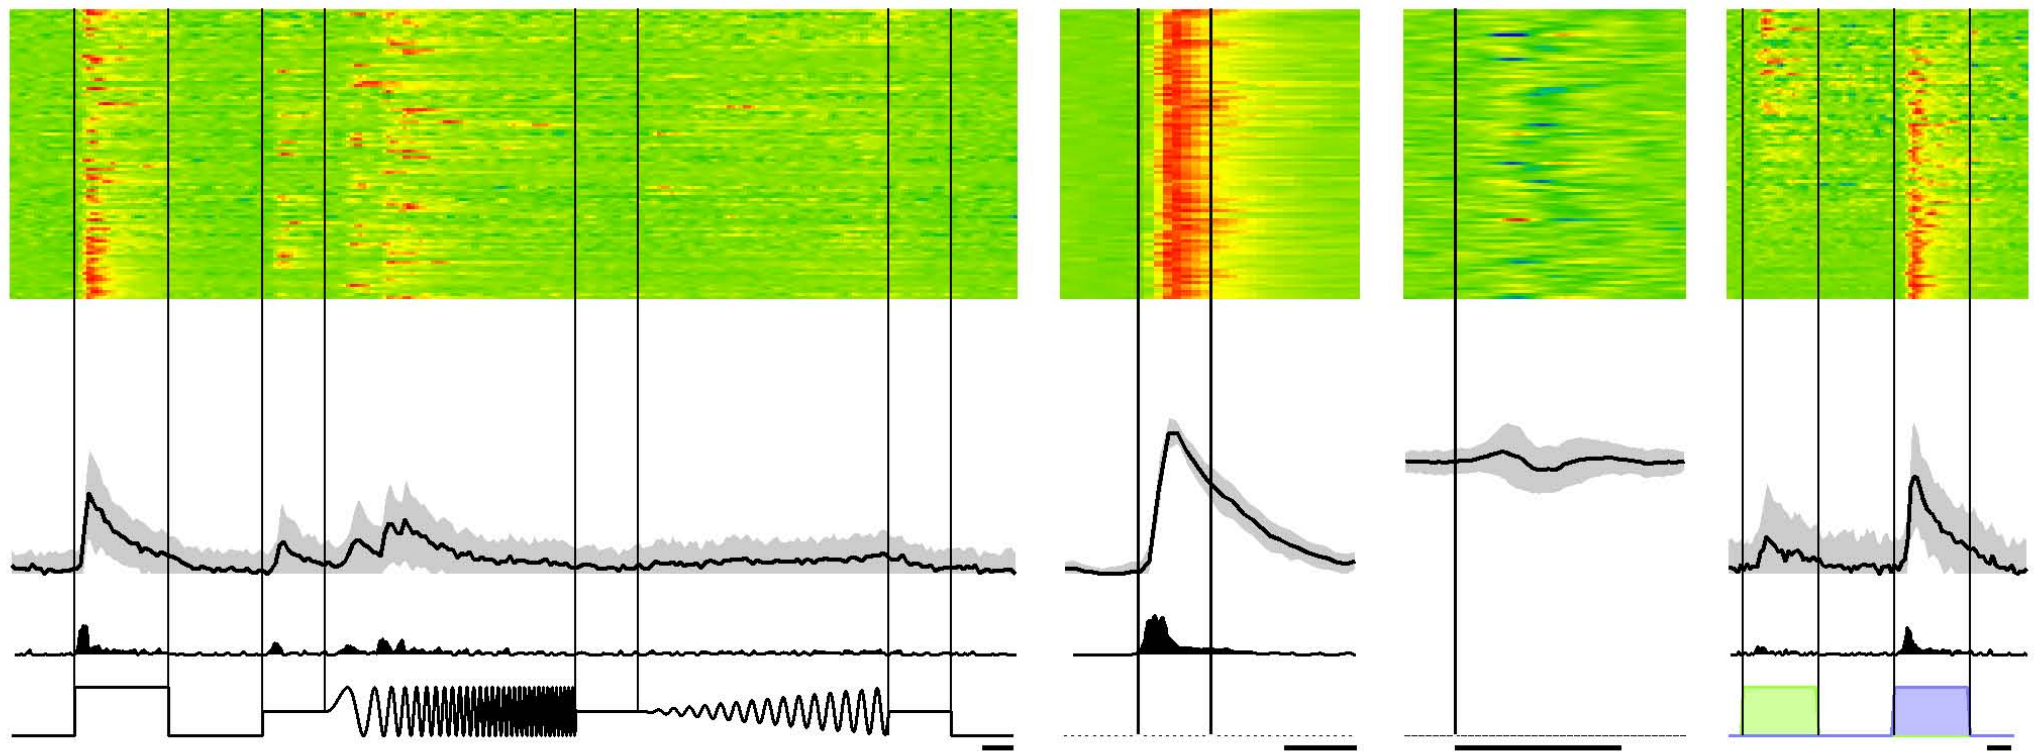

**b**

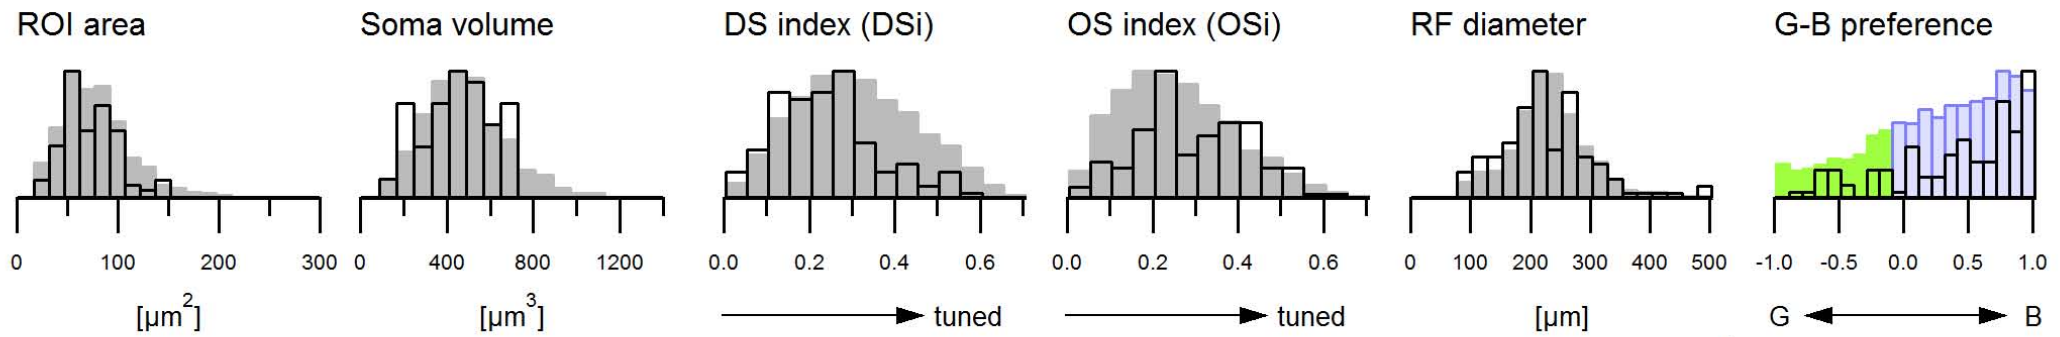

**c**

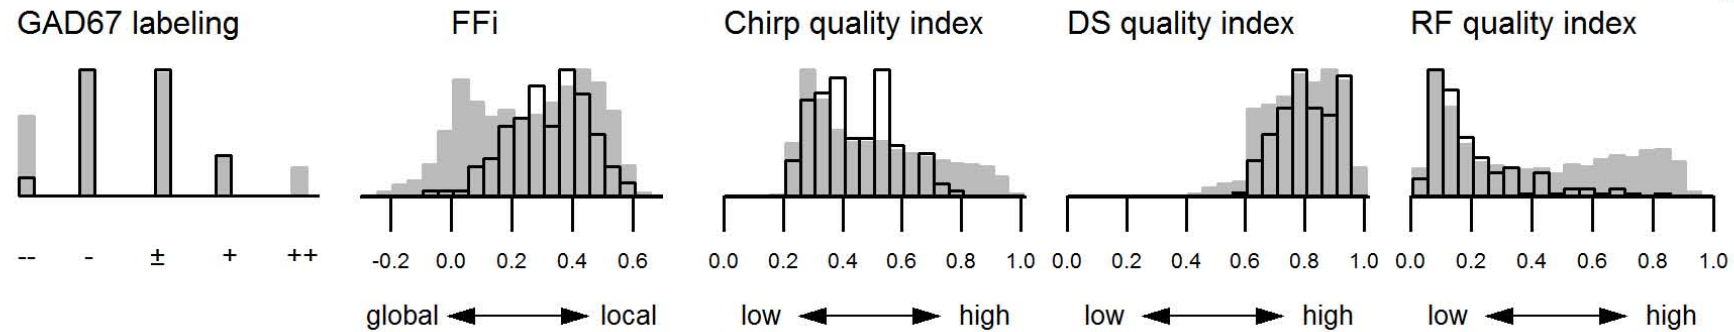

**d**

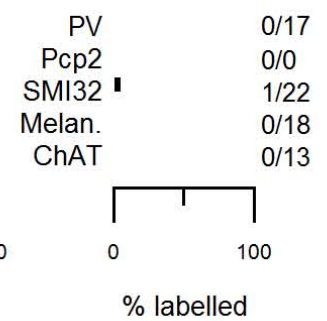

**Group 15 ON step**

n = 97 Cells, 1.93%, (1.93% of RGCs); CF: 1.8

SFig. 4-16 a

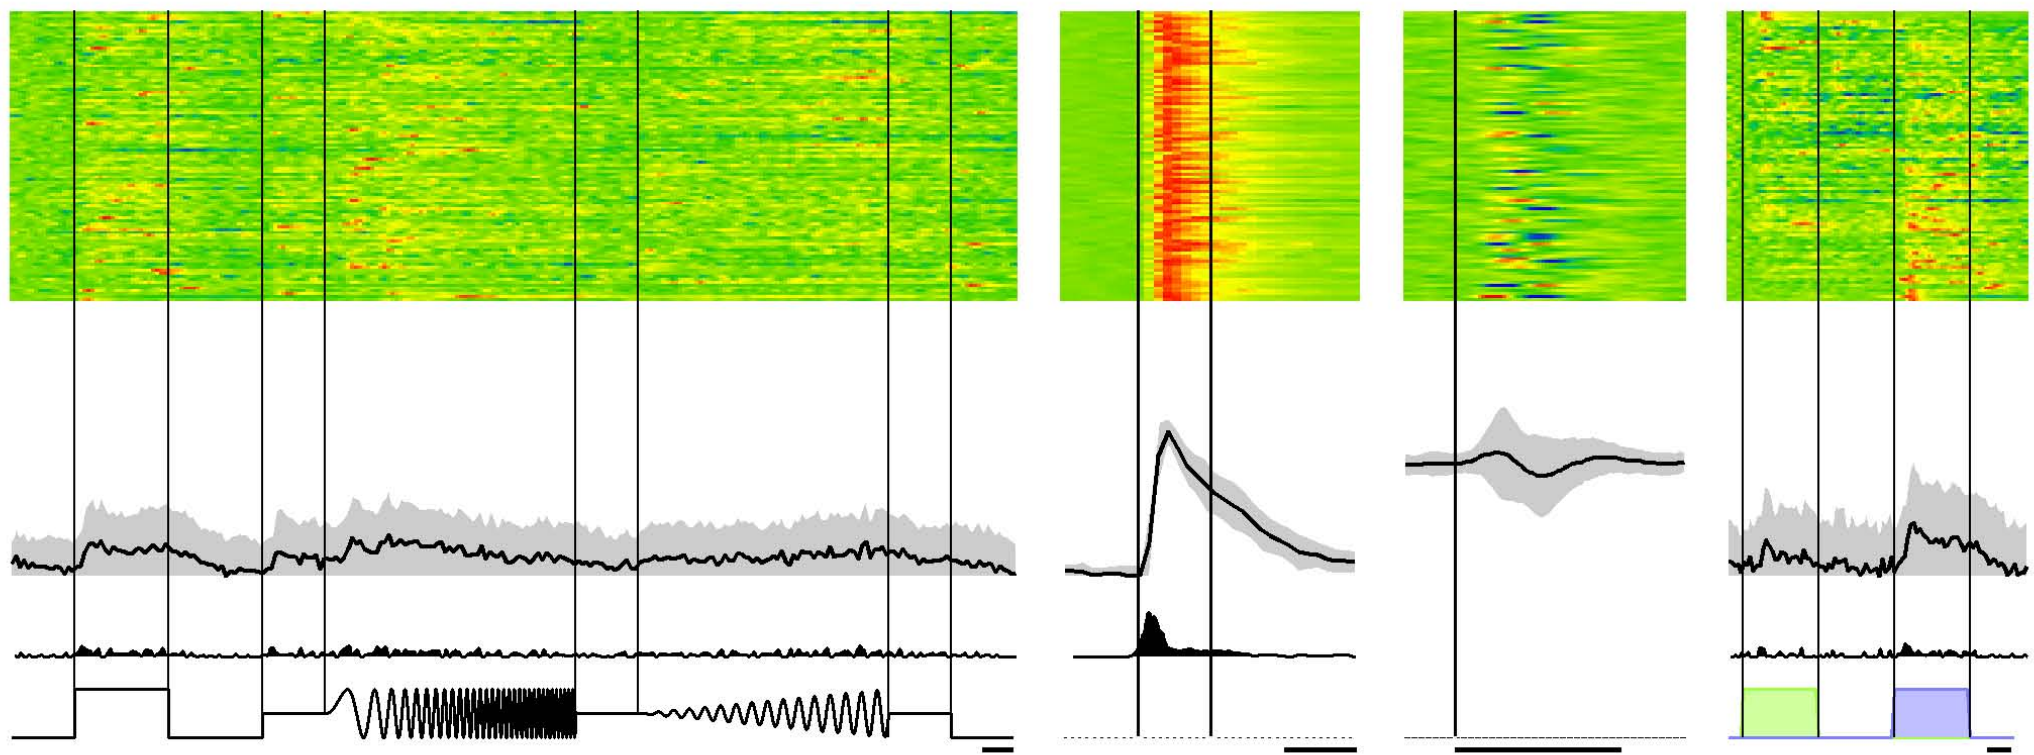

**b**

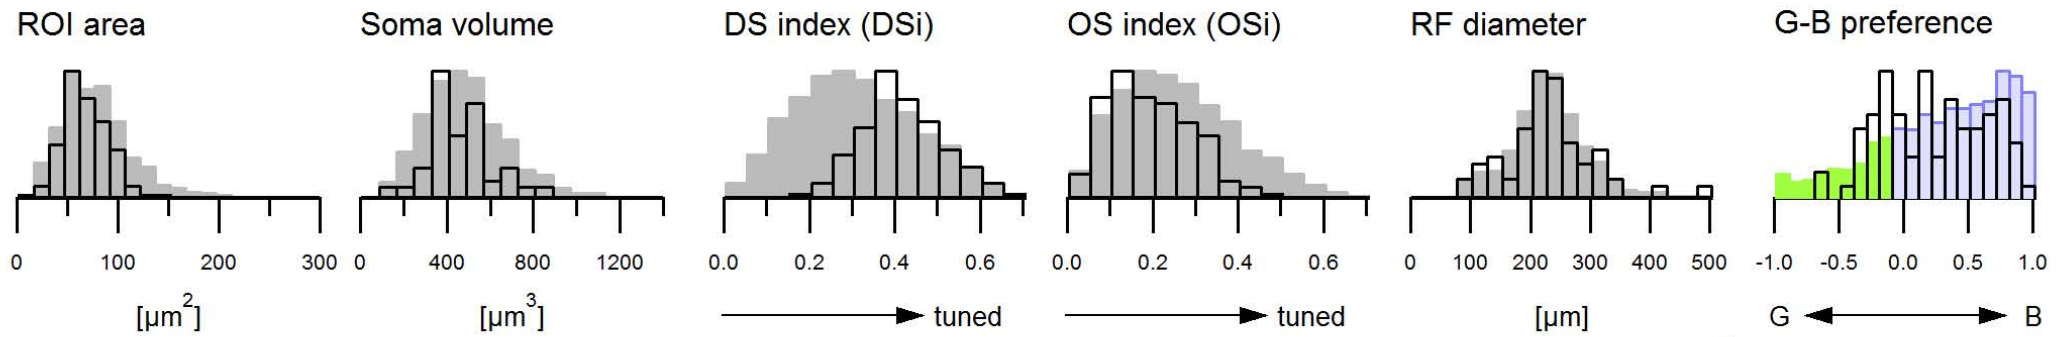

**c**

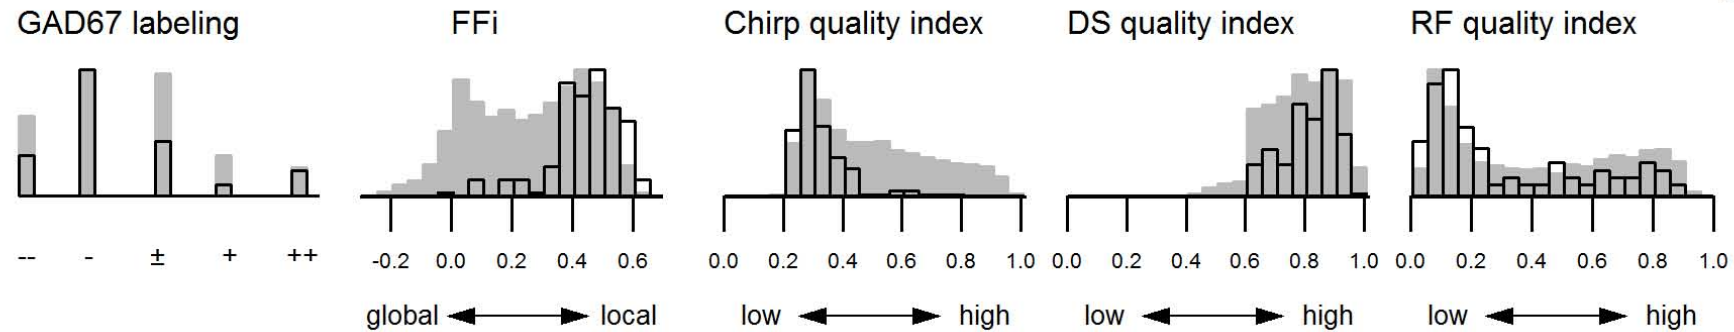

**d**

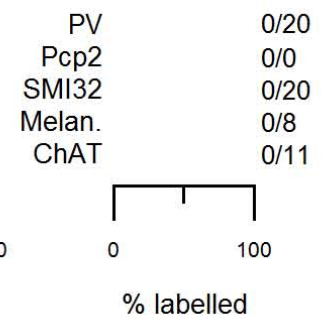

**Group 16 ON DS trans.**

n = 99 Cells, 1.97%, (1.97% of RGCs); CF: 1.63



SFig. 4-17 a

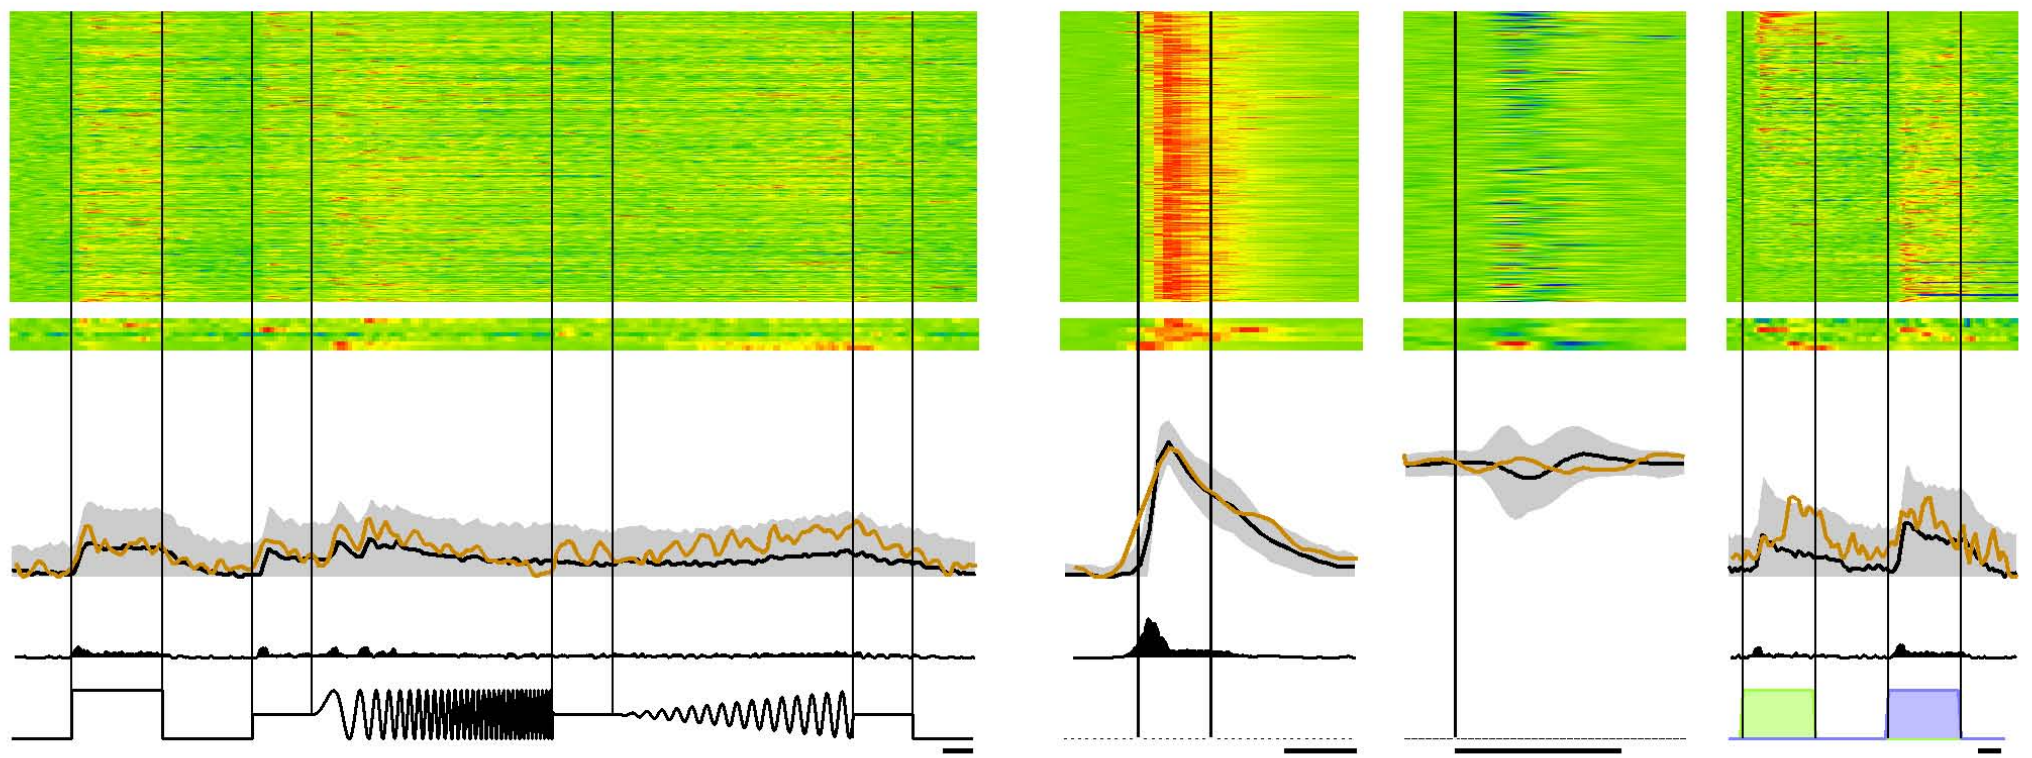

b

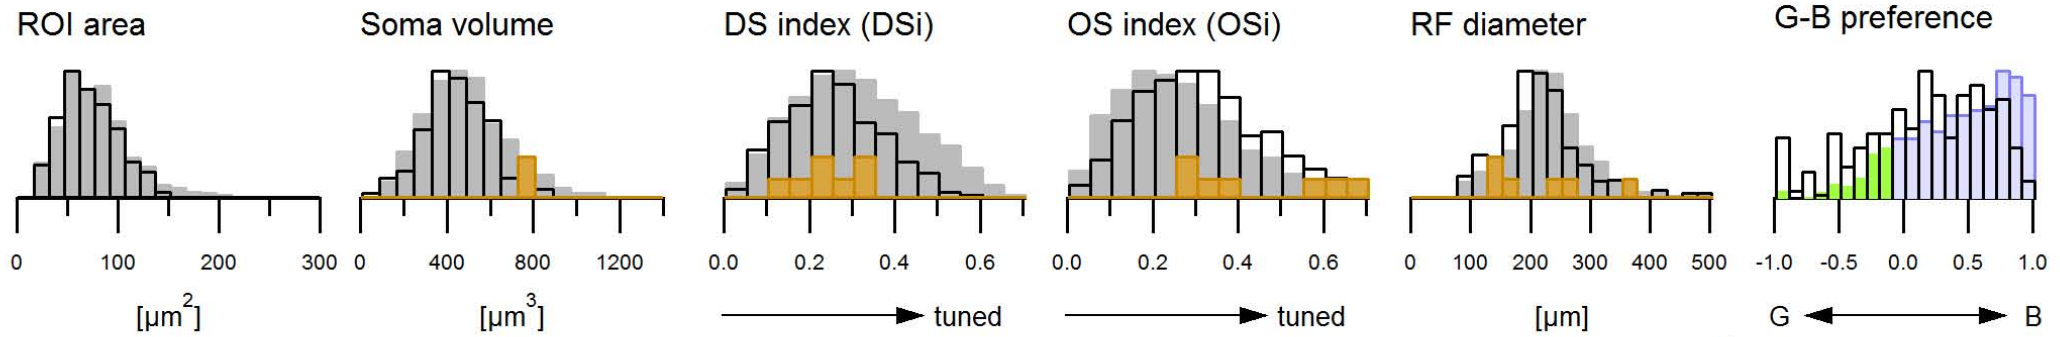

c

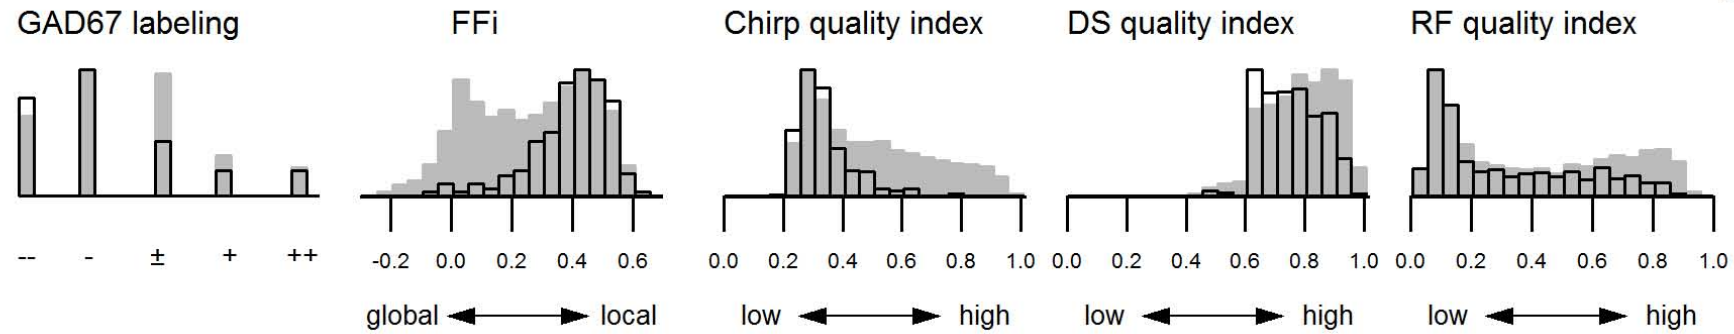

d

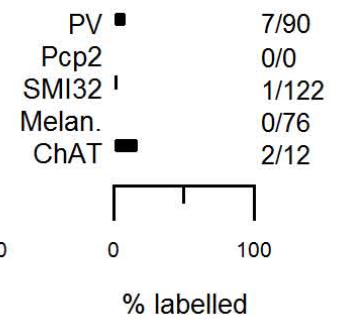

**Group 17** ON local trans., OS (a-c)  
 n = 439 Cells, 8.74%, (8.74% of RGCs); CF: 7.01

SFig. 4-18 a

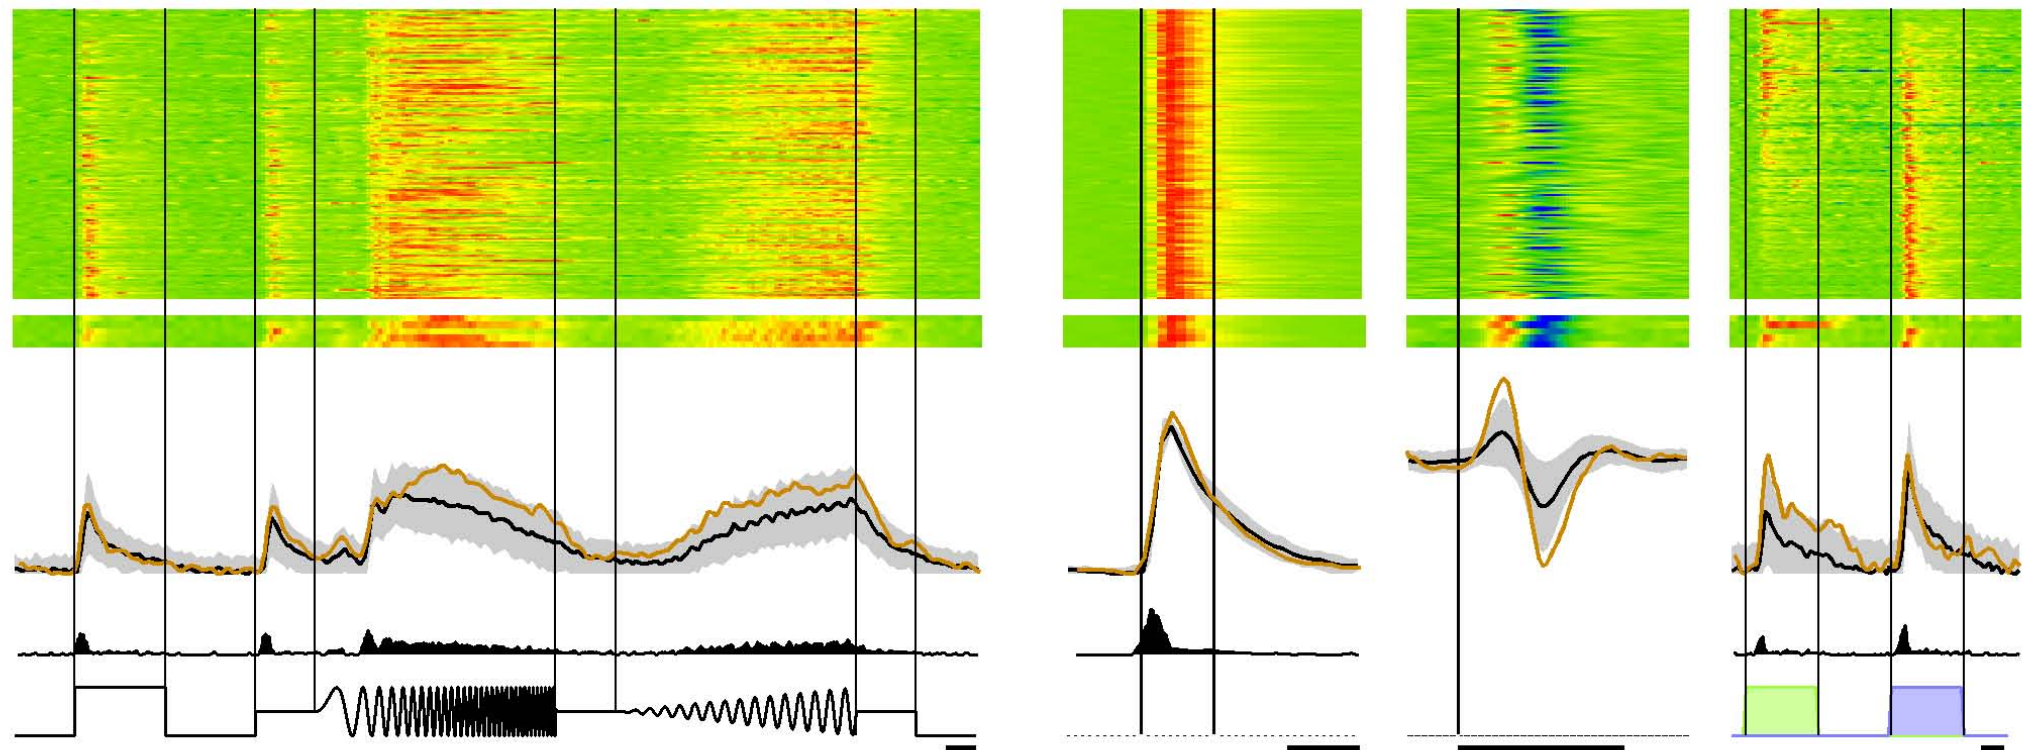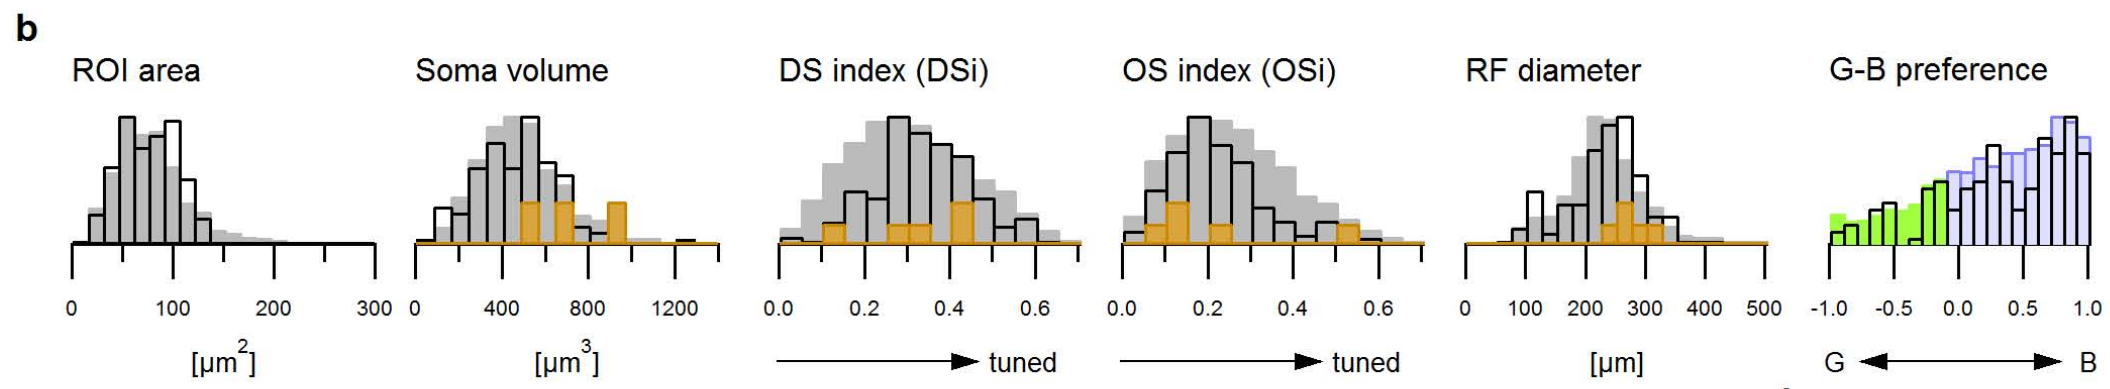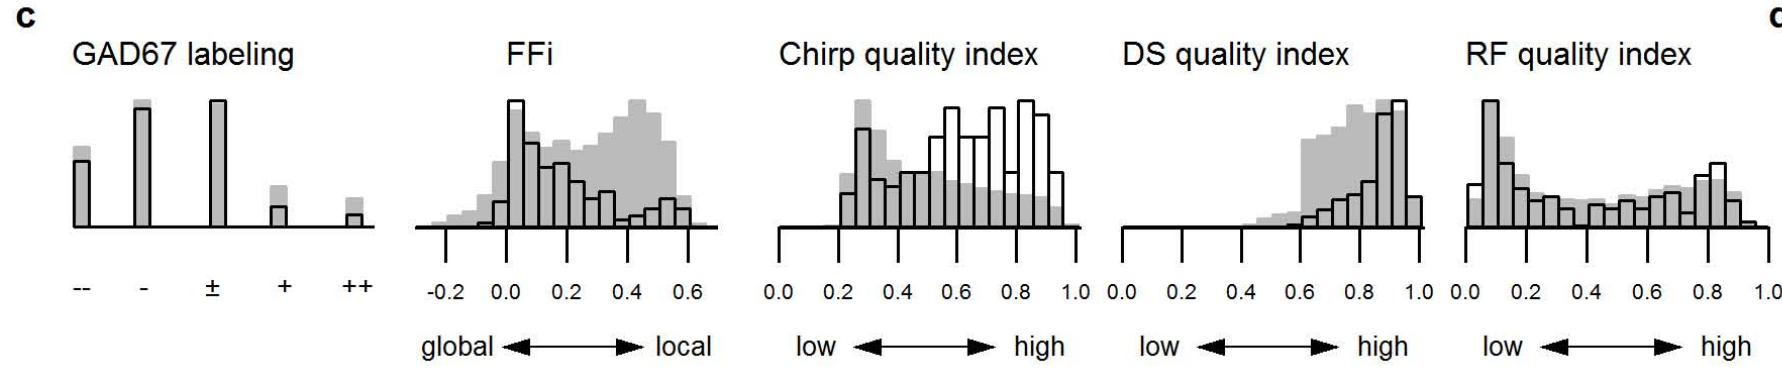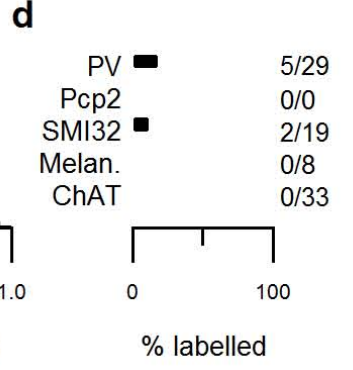

**Group 18 ON trans. (a,b)**  
 n = 171 Cells, 3.4%, (3.4% of RGCs); CF: 3.61

SFig. 4-19 a

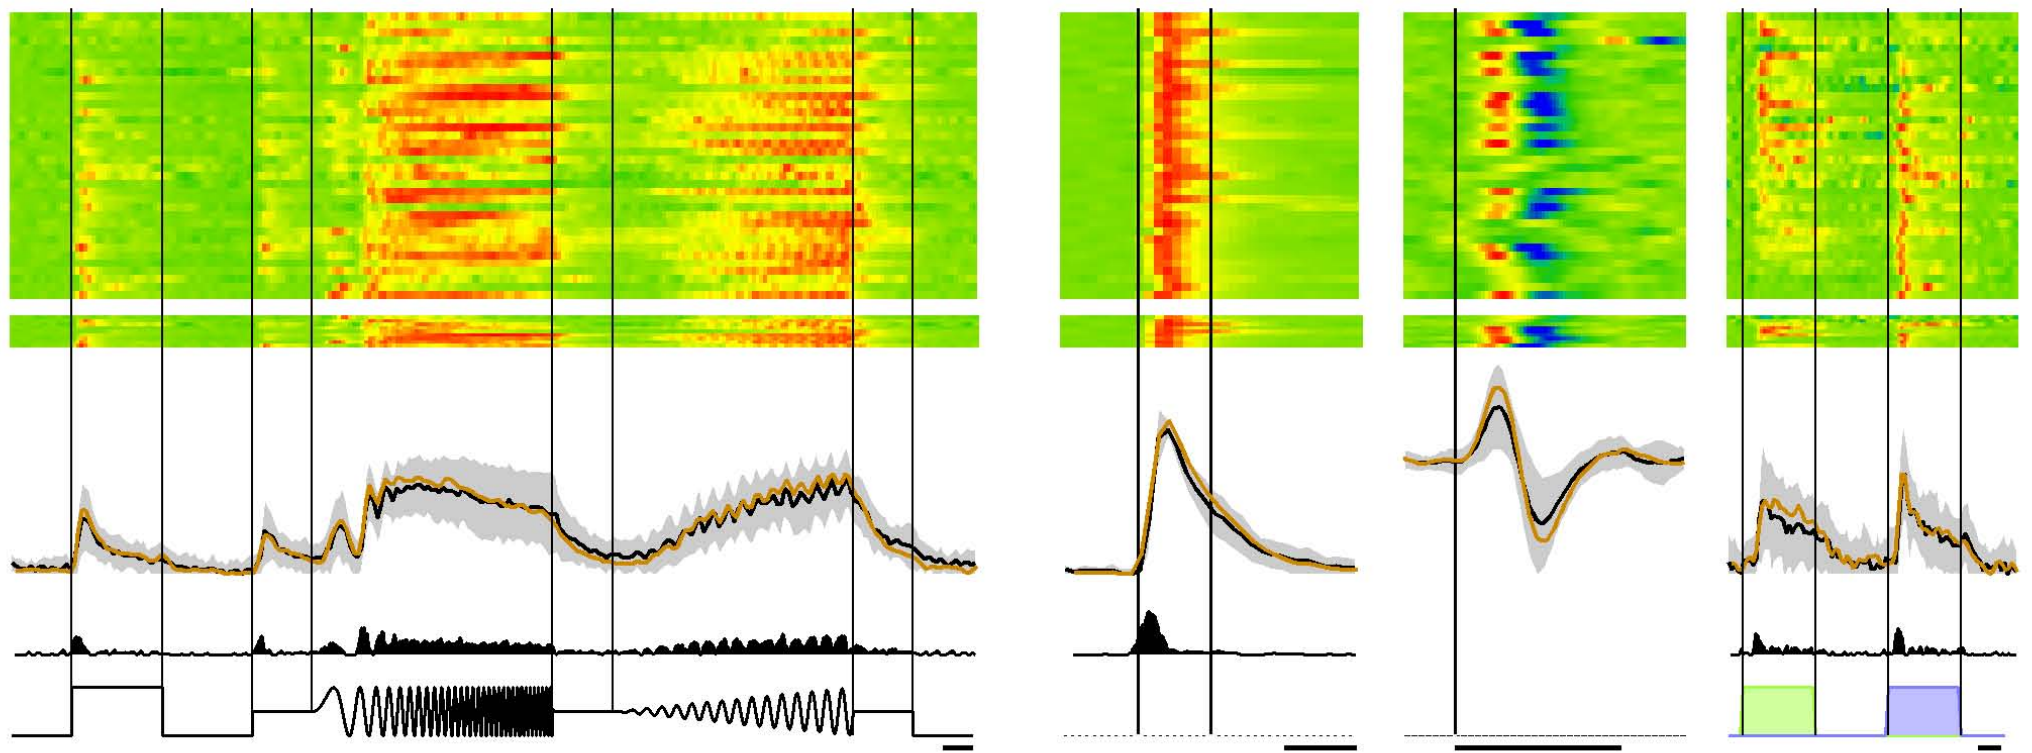

**b**

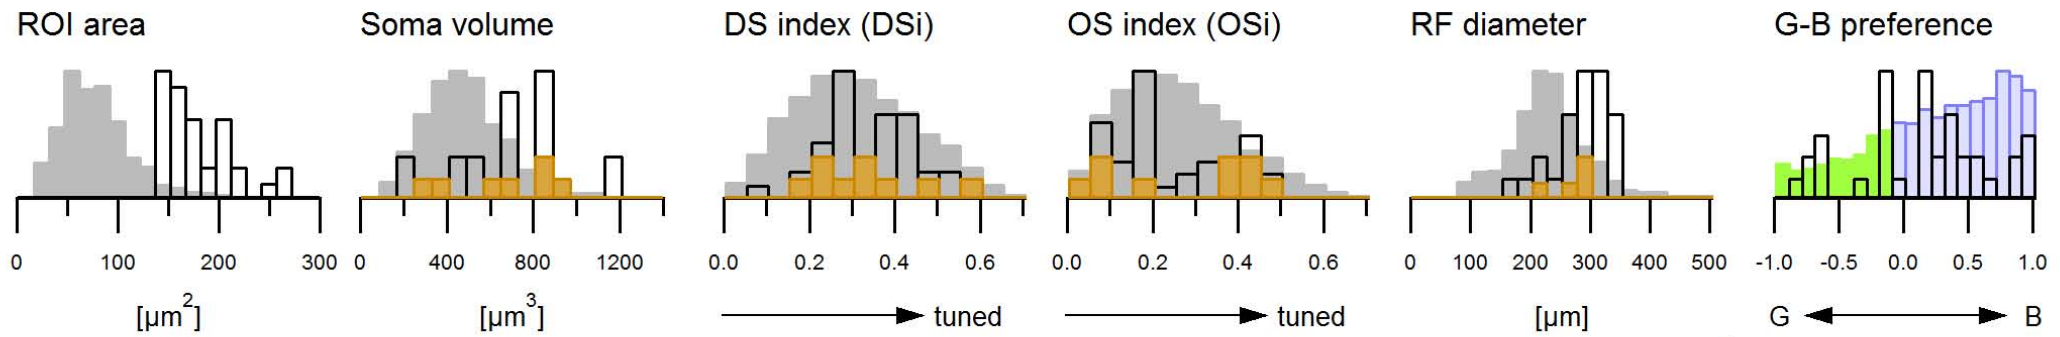

**c**

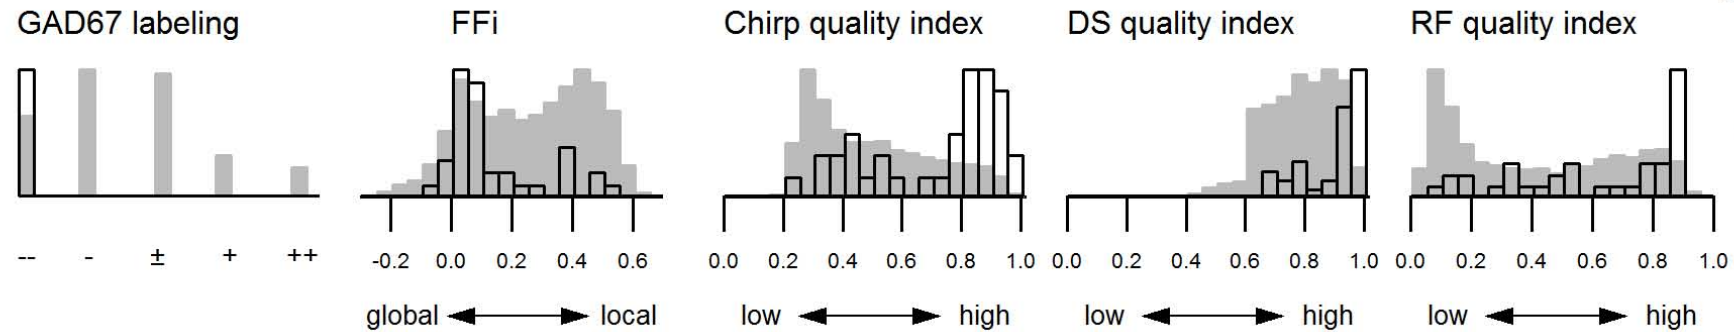

**d**

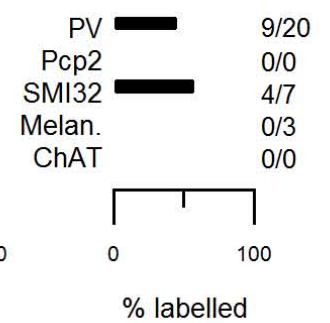

**Group 19** ON trans., large  
 n = 36 Cells, 0.72%, (0.72% of RGCs); CF: 0.97

SFig. 4-20 a

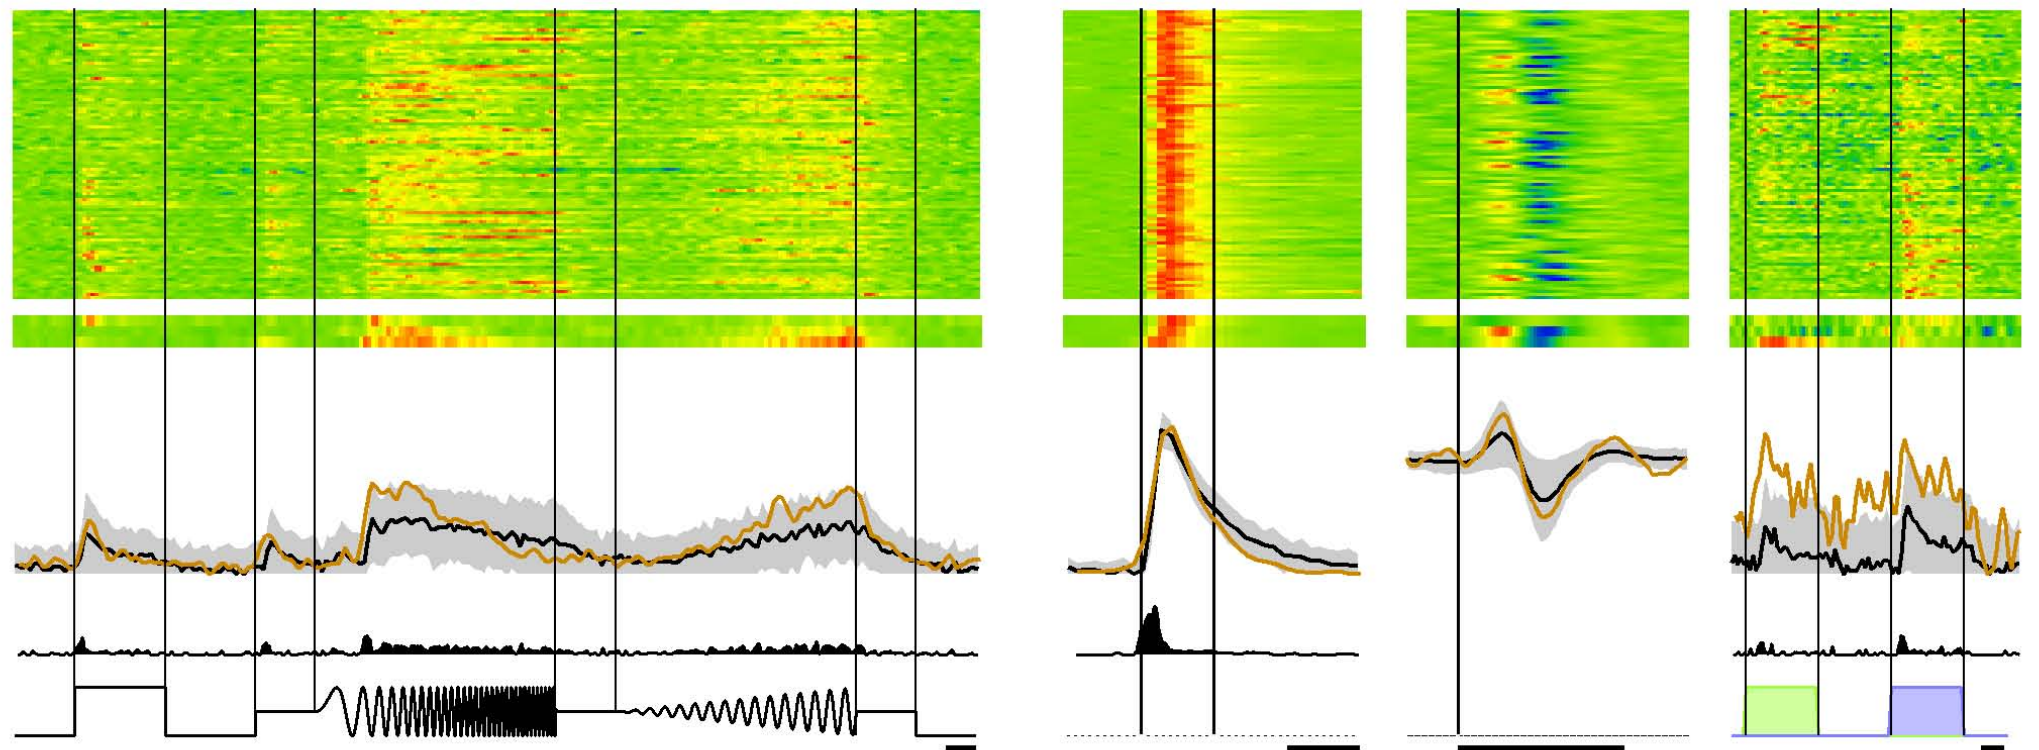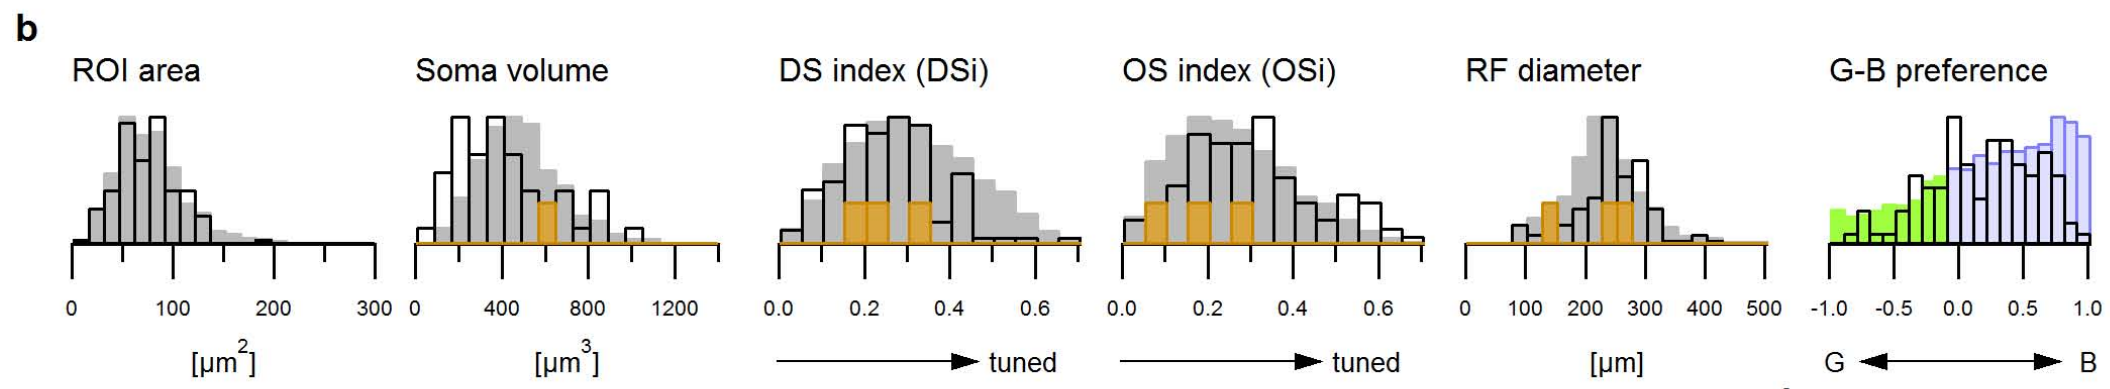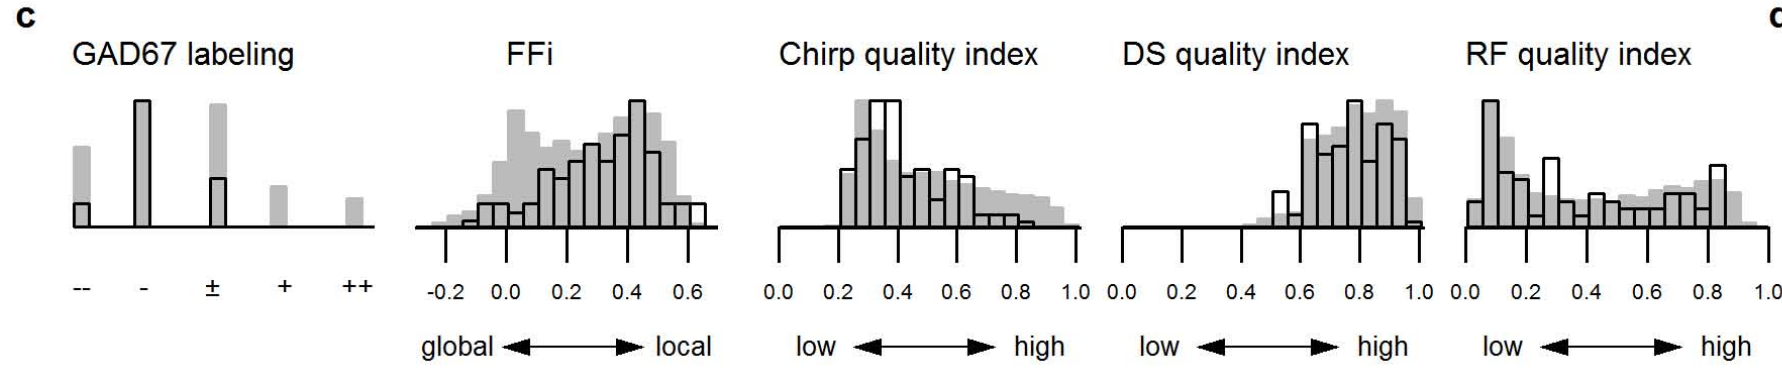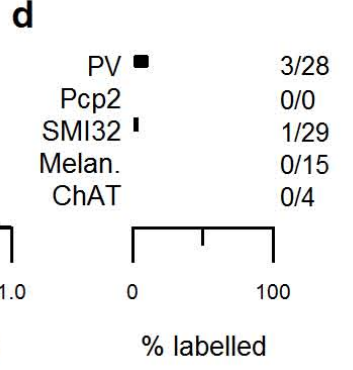

**Group 20** ON high freq.  
 n = 95 Cells, 1.89%, (1.89% of RGCs); CF: 1.94

SFig. 4-21 a

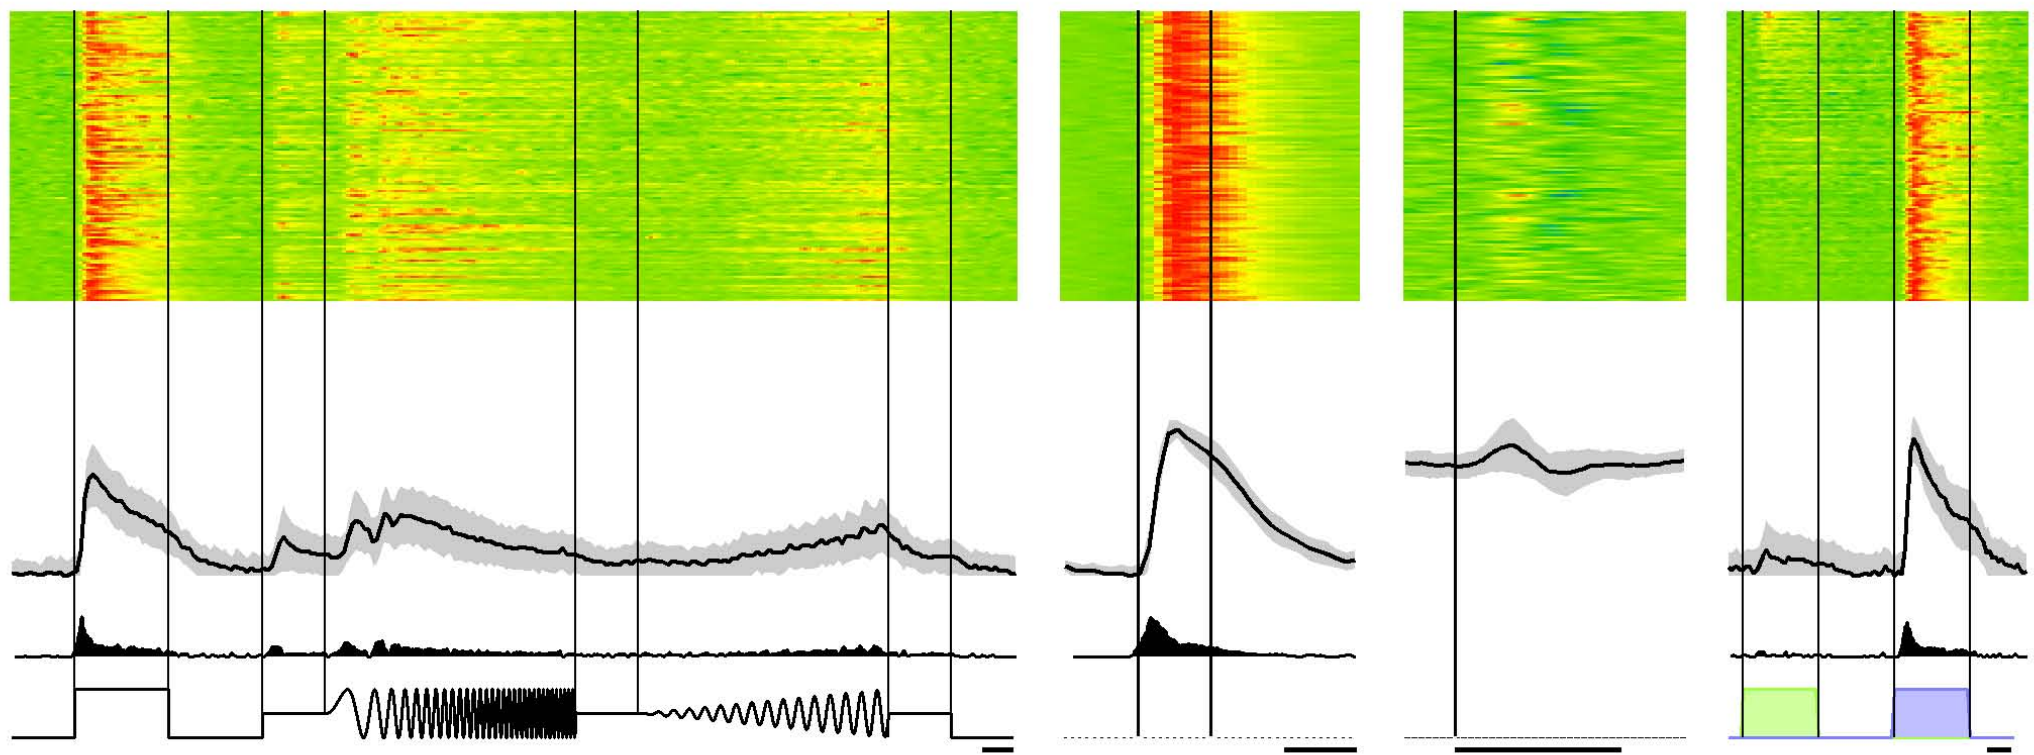

**b**

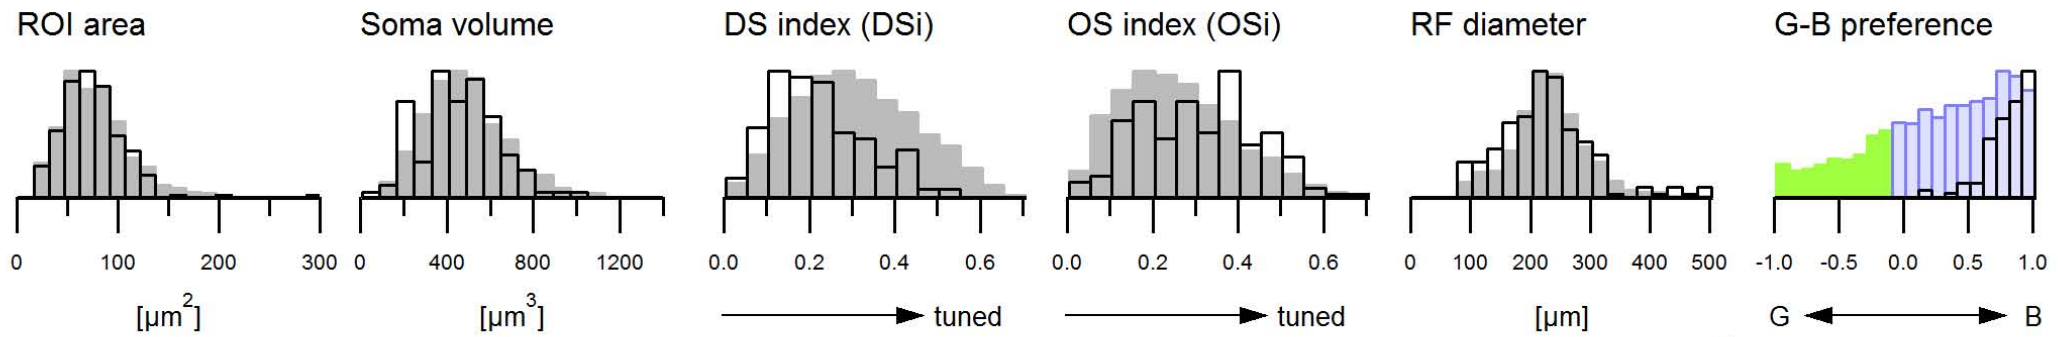

**c**

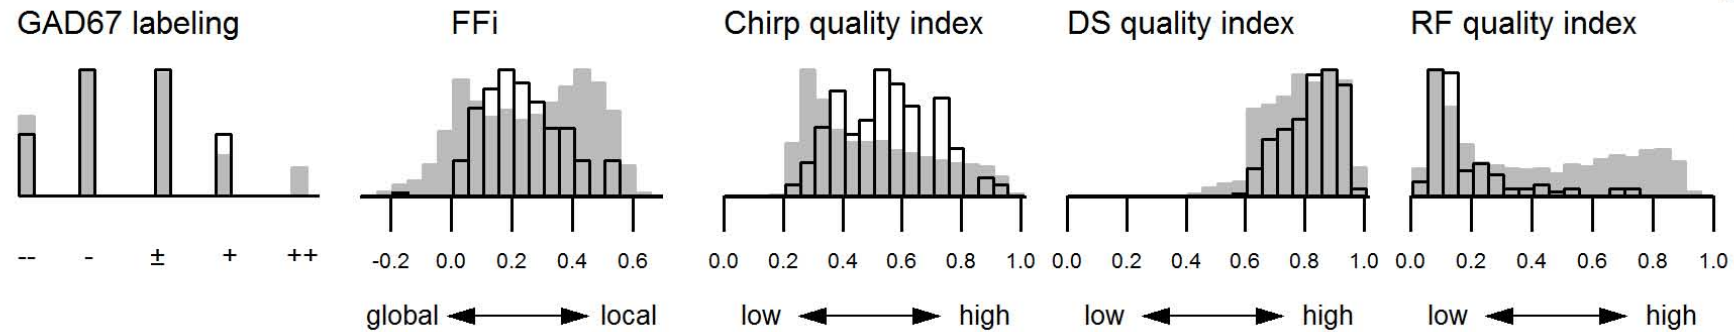

**d**

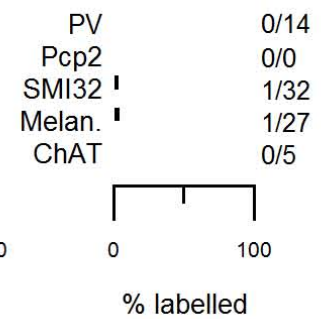

**Group 21** ON low freq.

n = 125 Cells, 2.49%, (2.49% of RGCs); CF: 2.38

SFig. 4-22 a

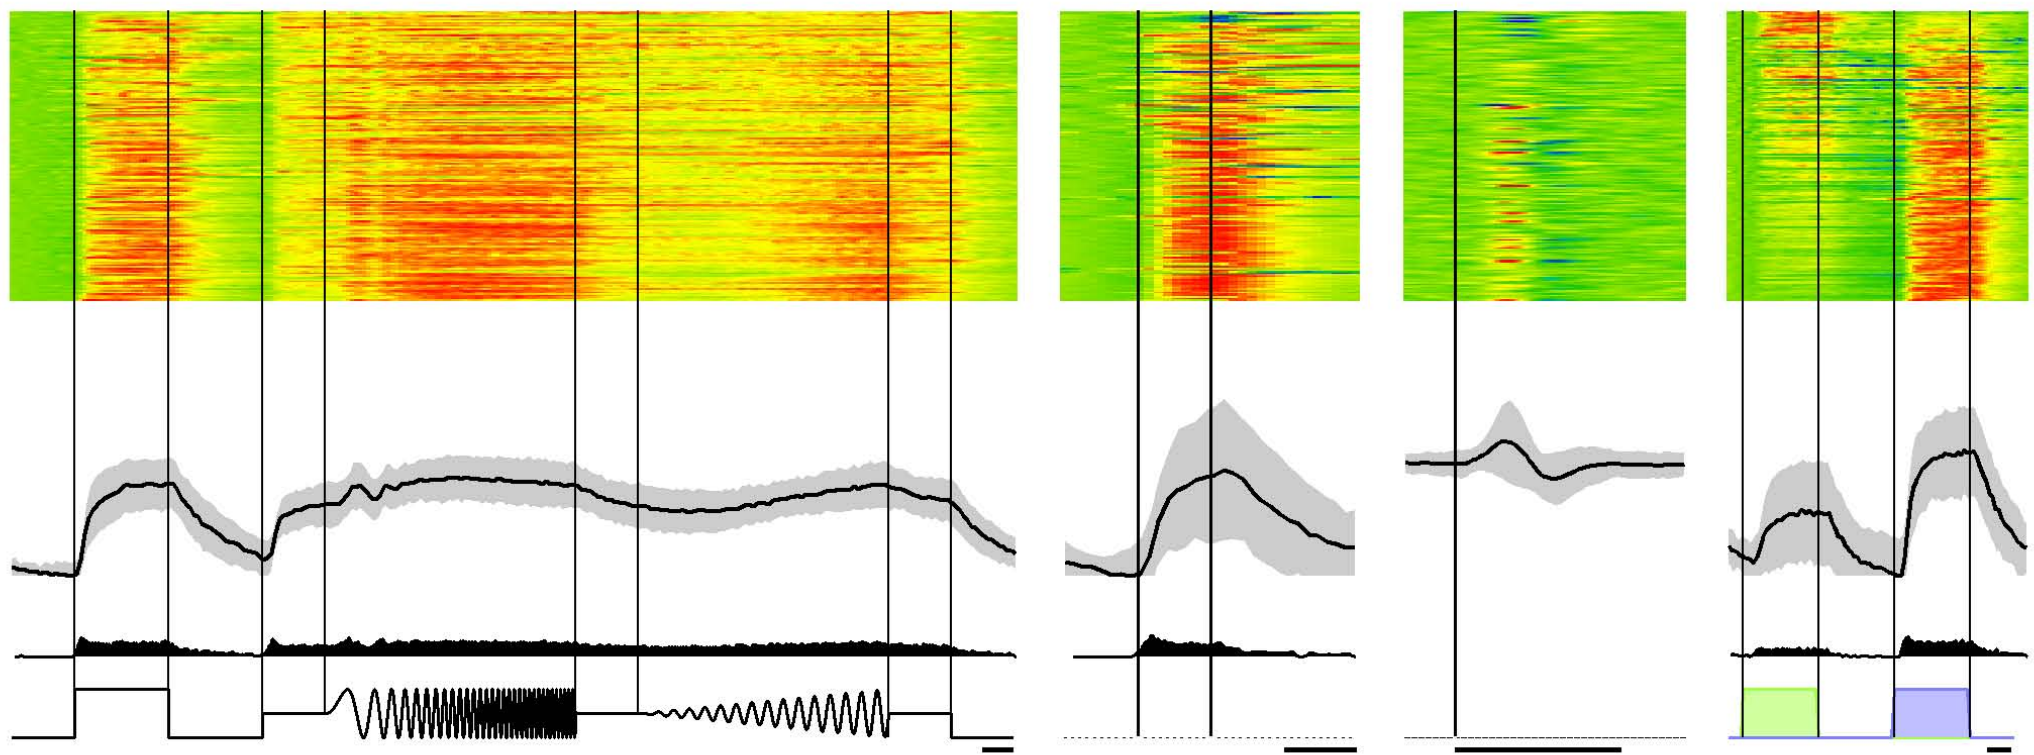

**b**

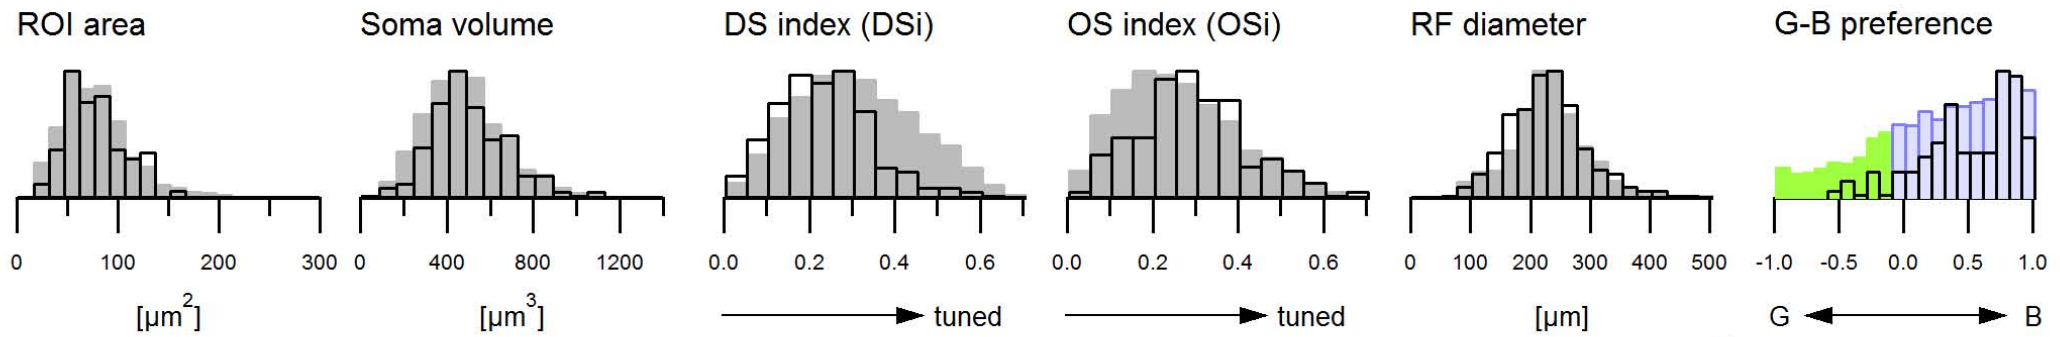

**c**

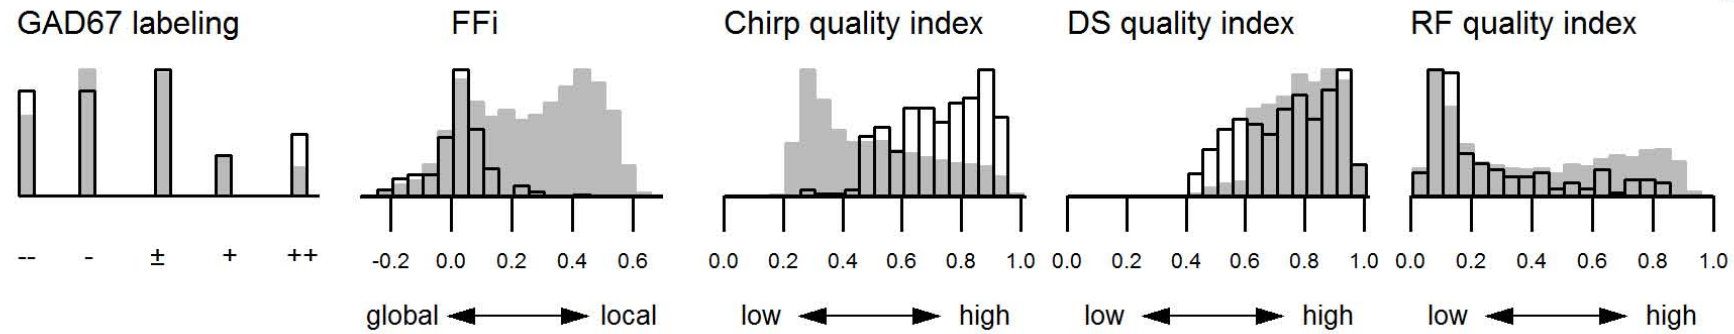

**d**

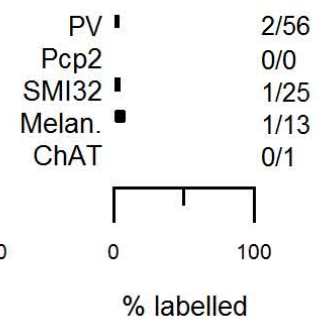

**Group 22 ON sust. (a,b)**

n = 183 Cells, 3.64%, (3.64% of RGCs); CF: 3.48

SFig. 4-23 a

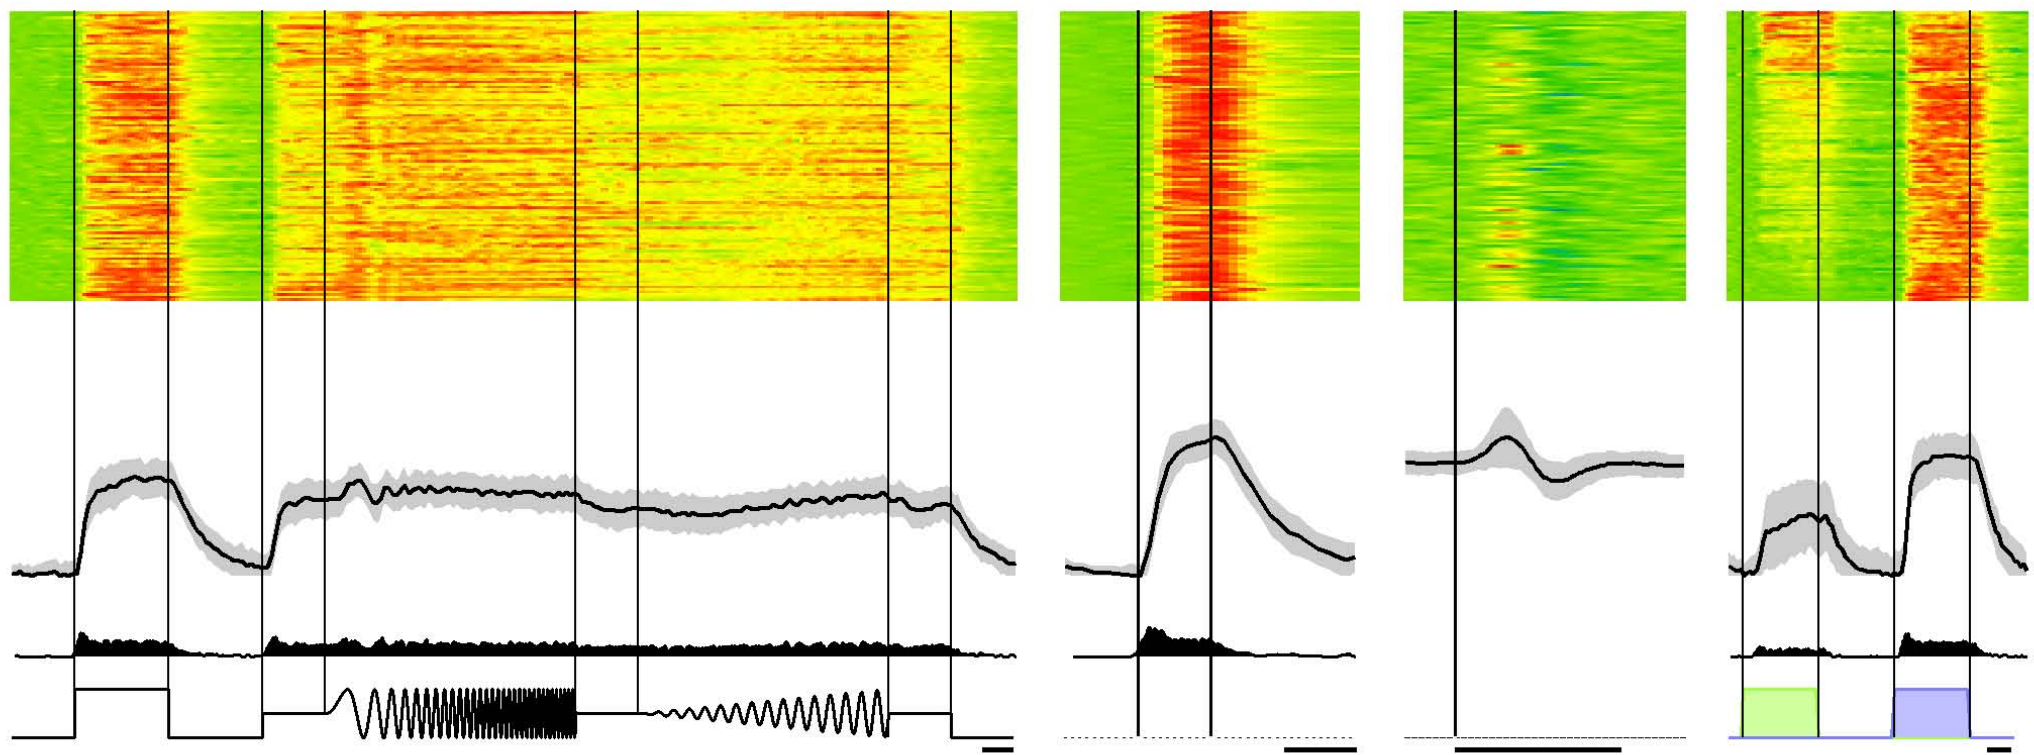

**b**

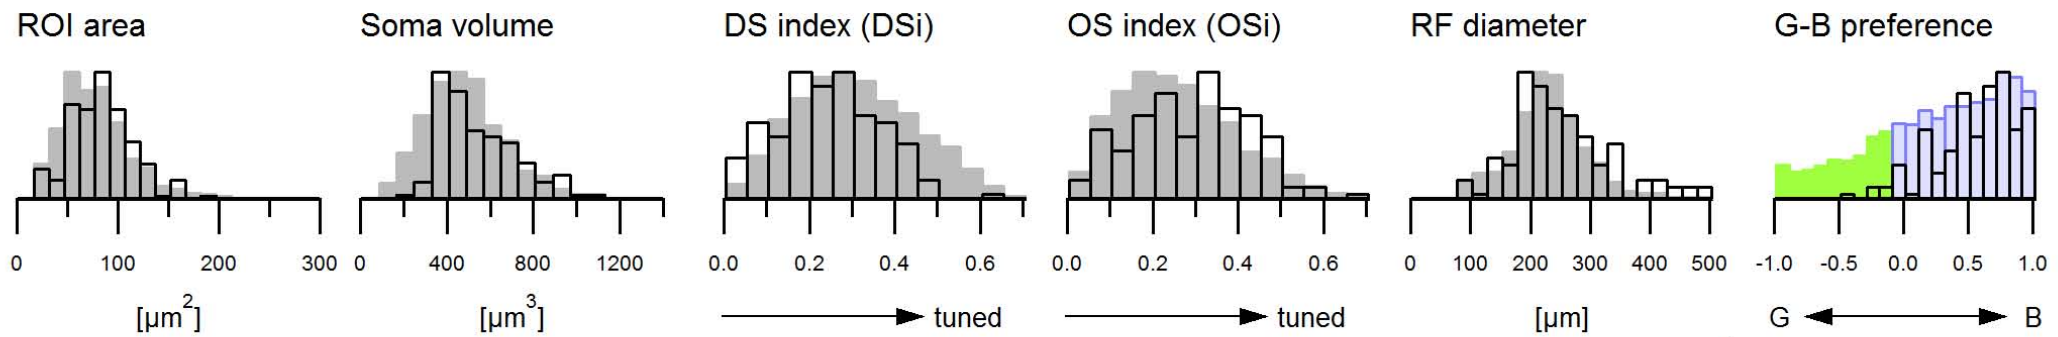

**c**

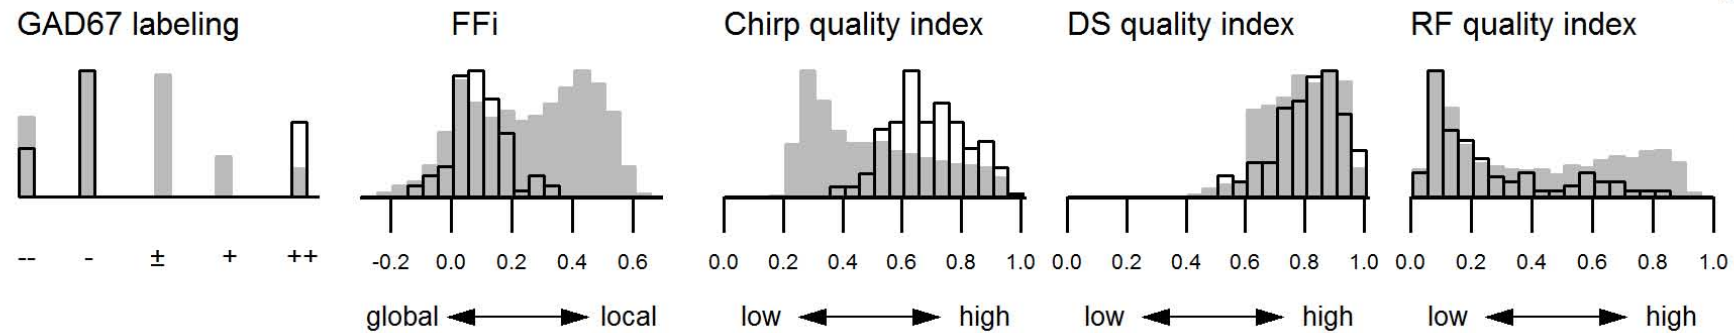

**d**

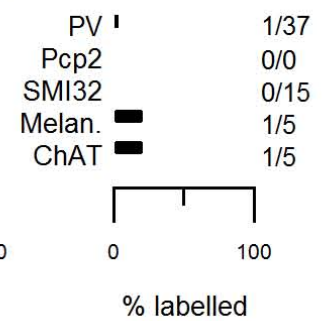

**Group 23** ON "mini" alpha

n = 113 Cells, 2.25%, (2.25% of RGCs); CF: 2.82

SFig. 4-24 a

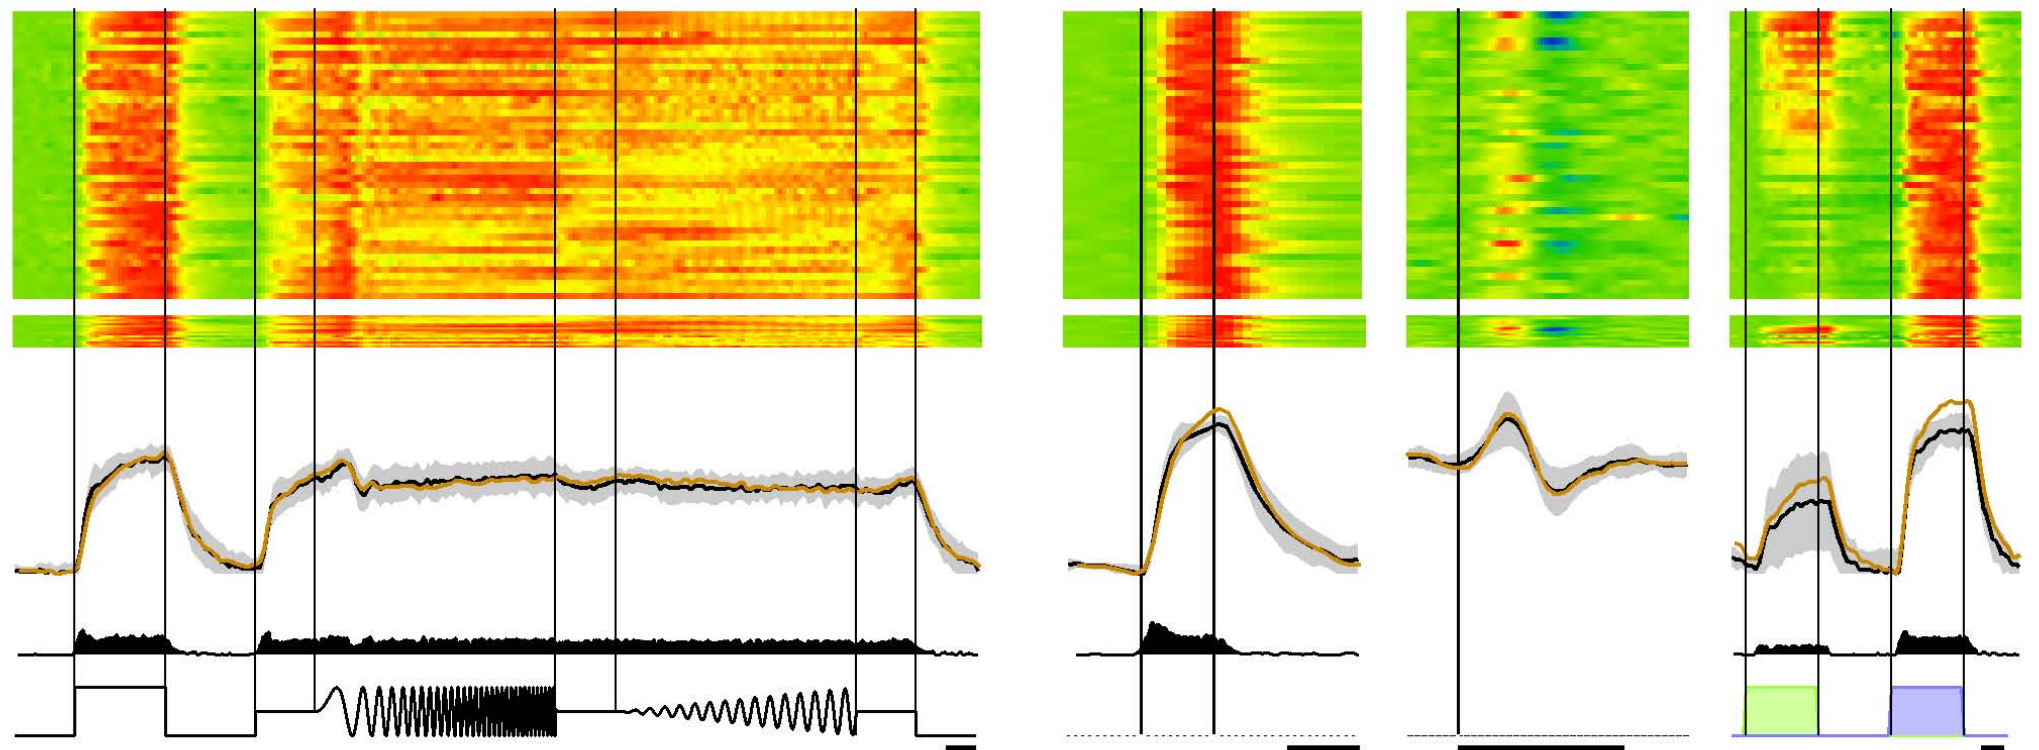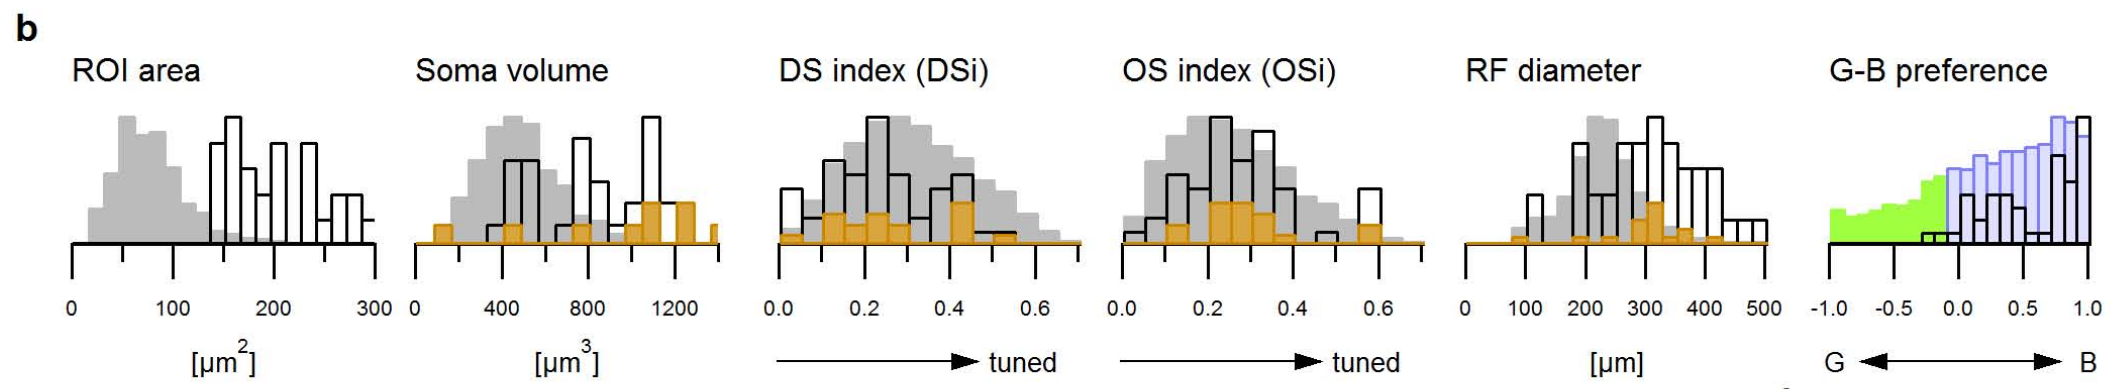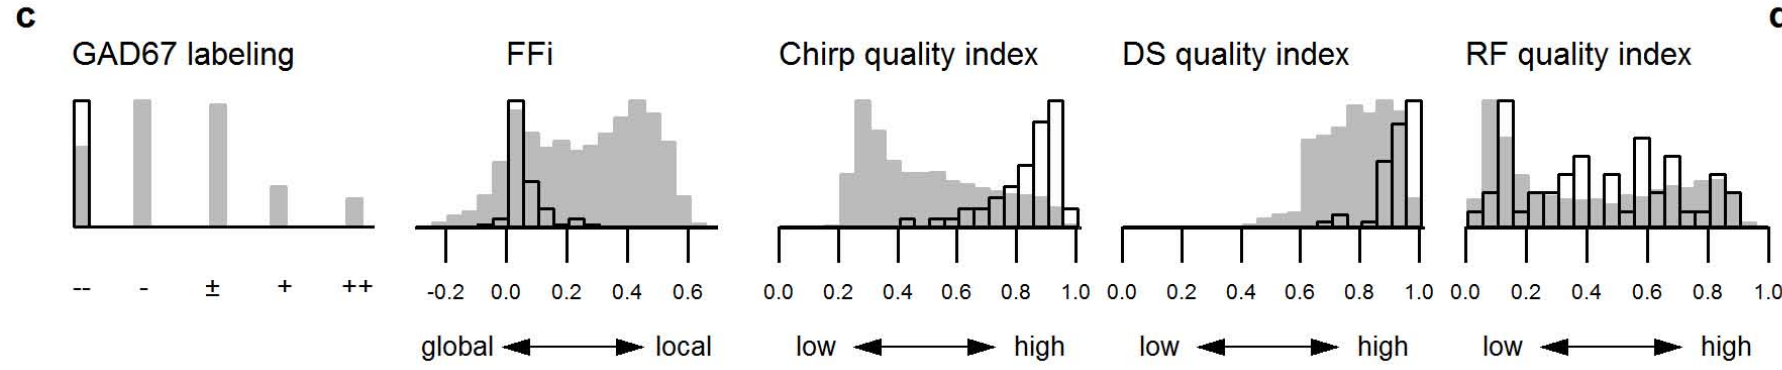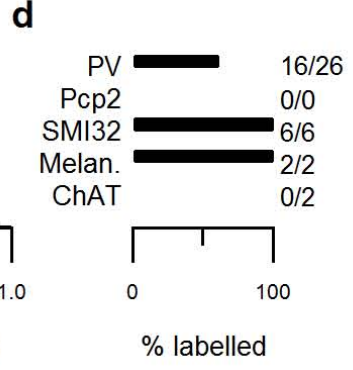

**Group 24 ON alpha**  
 n = 44 Cells, 0.88%, (0.88% of RGCs); CF: 1.63



SFig. 4-25 a

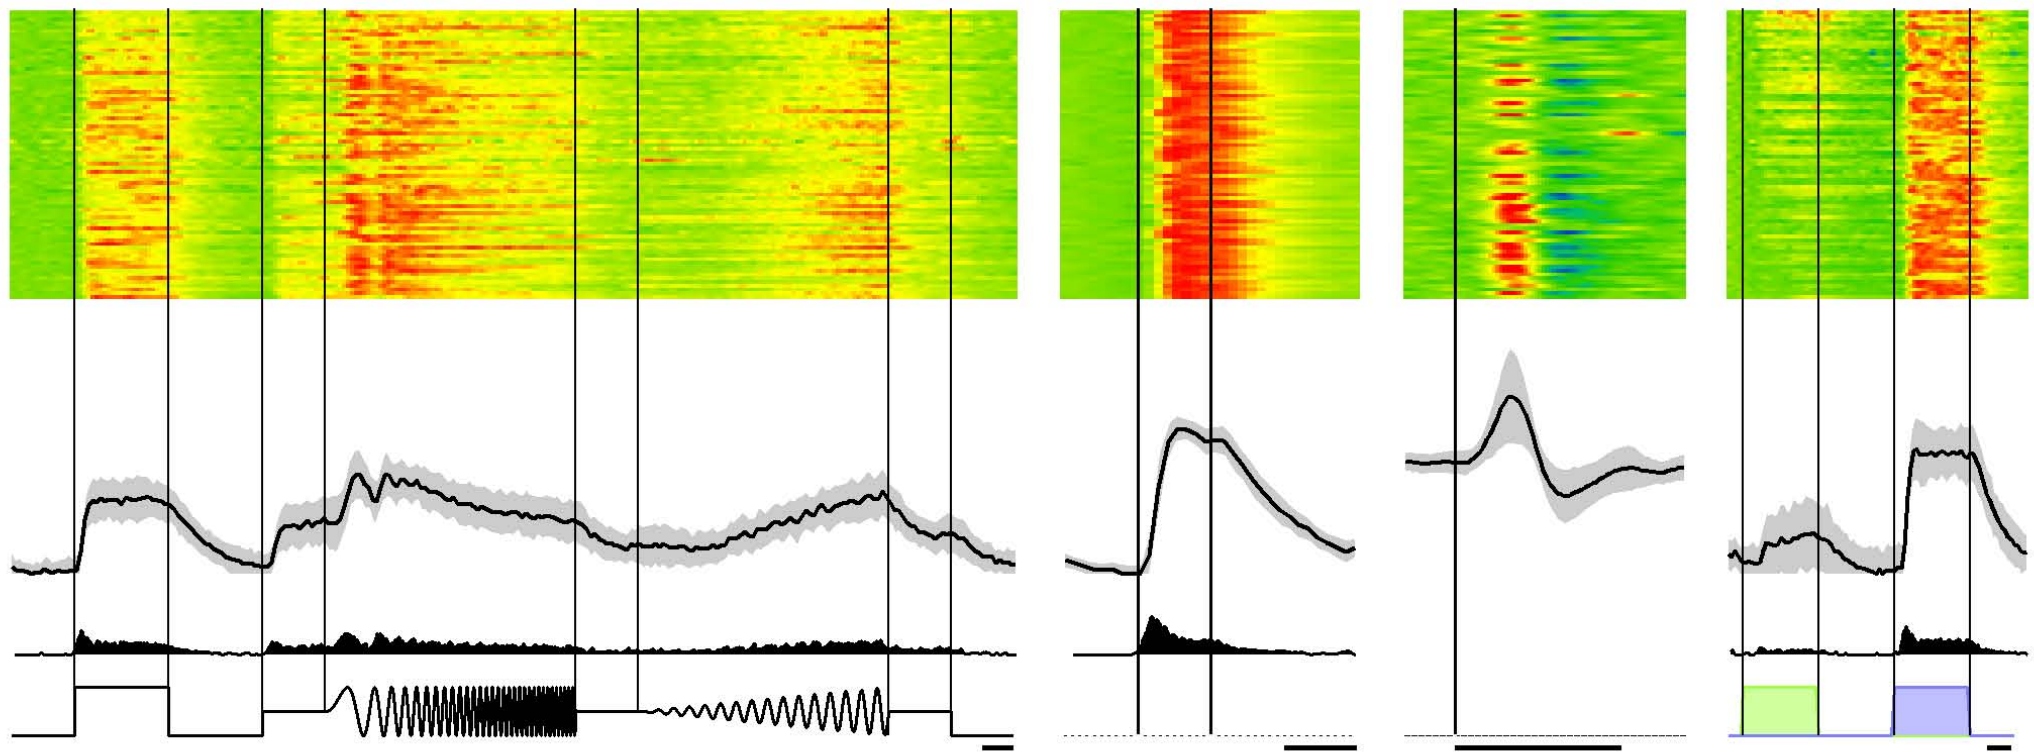

**b**

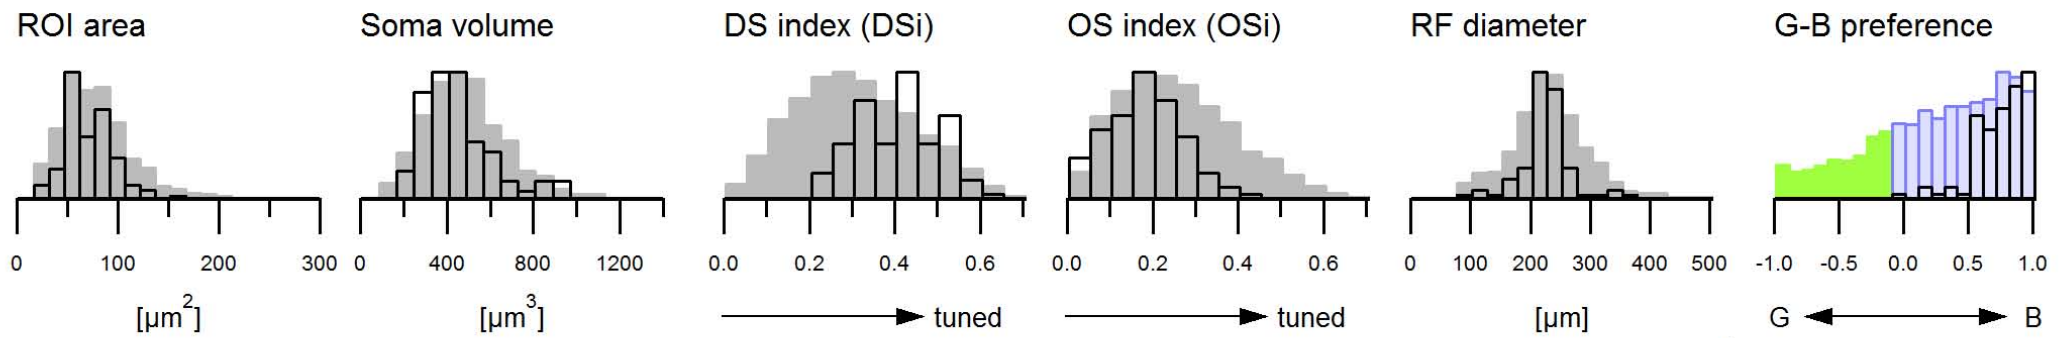

**c**

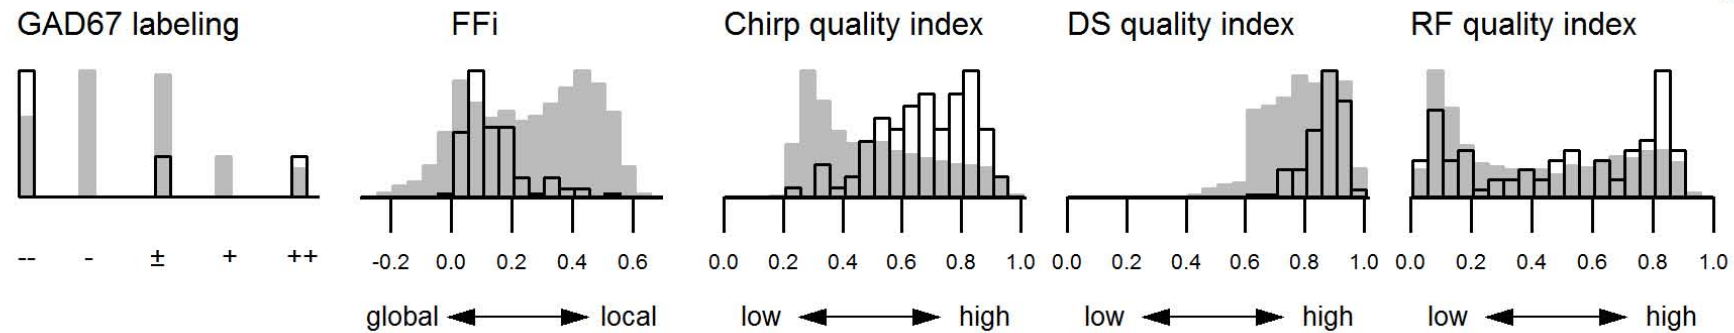

**d**

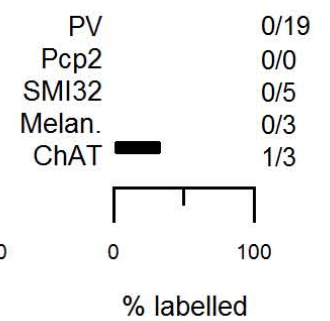

**Group 25 ON DS sust. 1**

n = 76 Cells, 1.51%, (1.51% of RGCs); CF: 1.17

SFig. 4-26 a

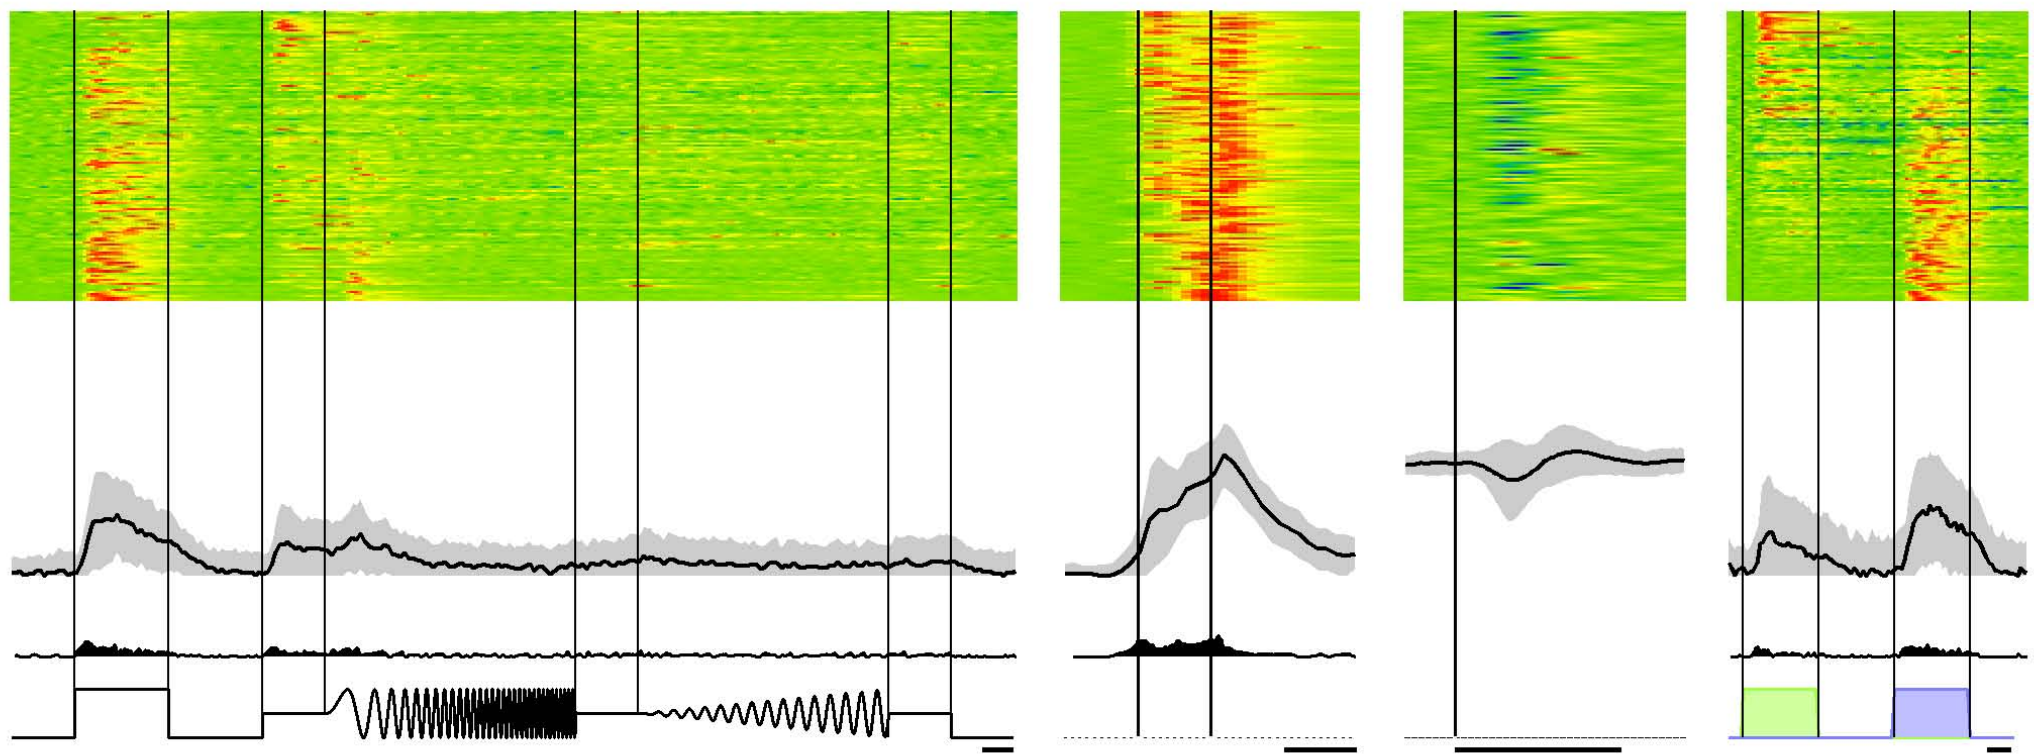

**b**

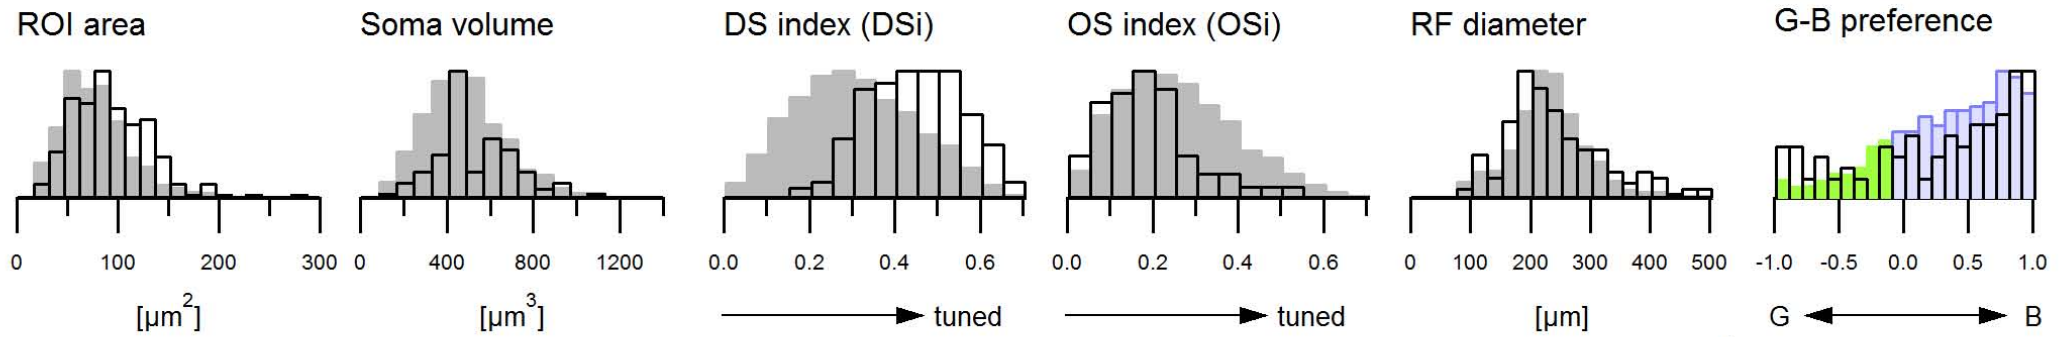

**c**

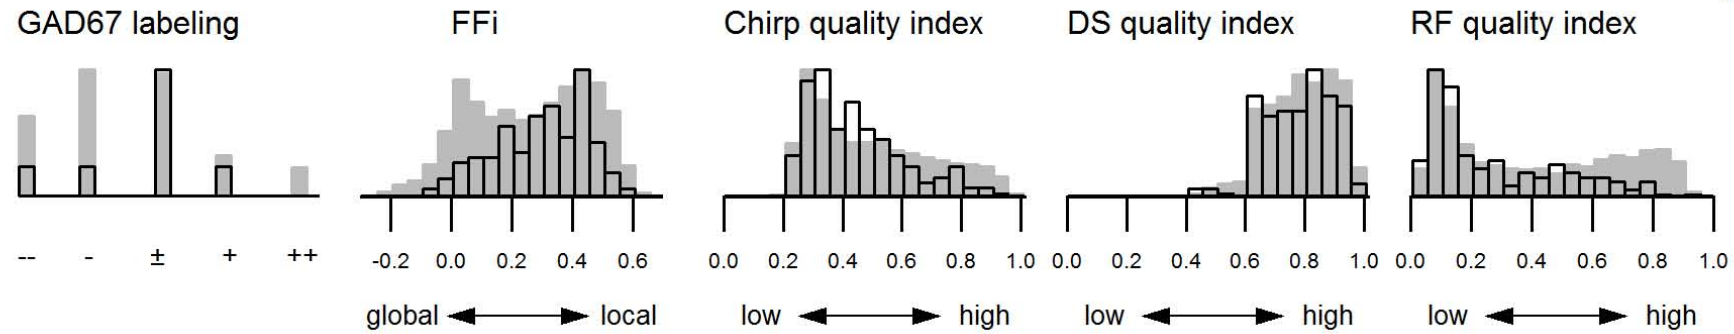

**d**

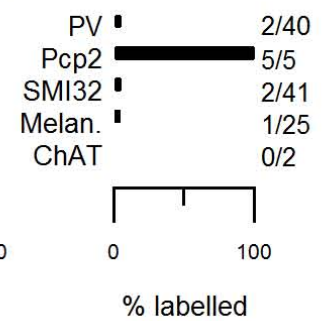

**Group 26 ON DS sust. 2**

n = 141 Cells, 2.81%, (2.81% of RGCs); CF: 2.44

SFig. 4-27 a

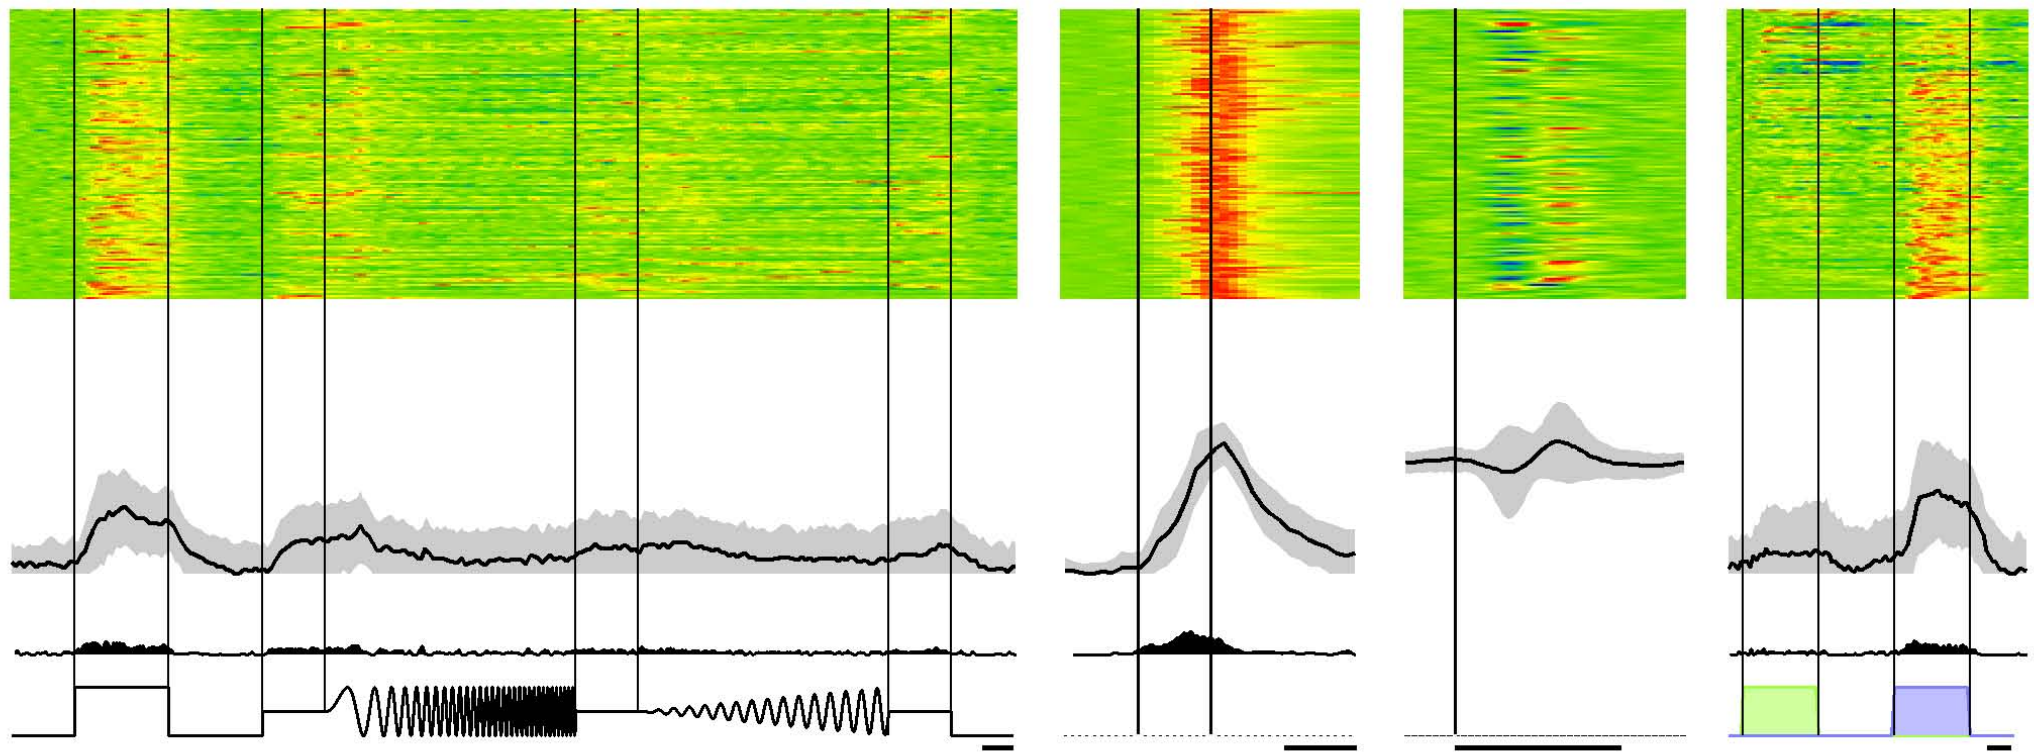

**b**

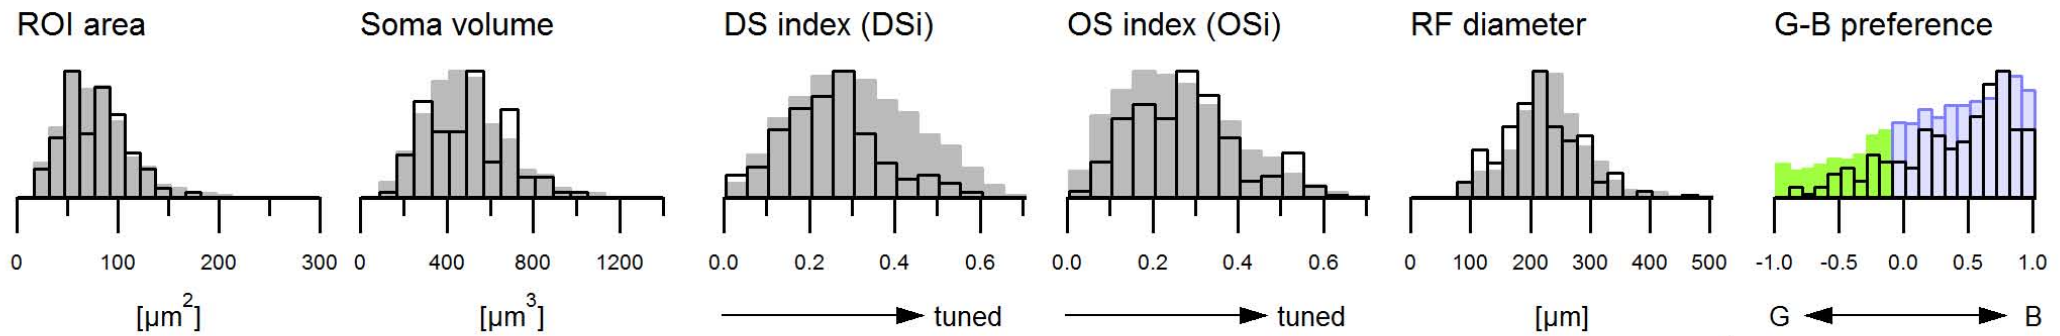

**c**

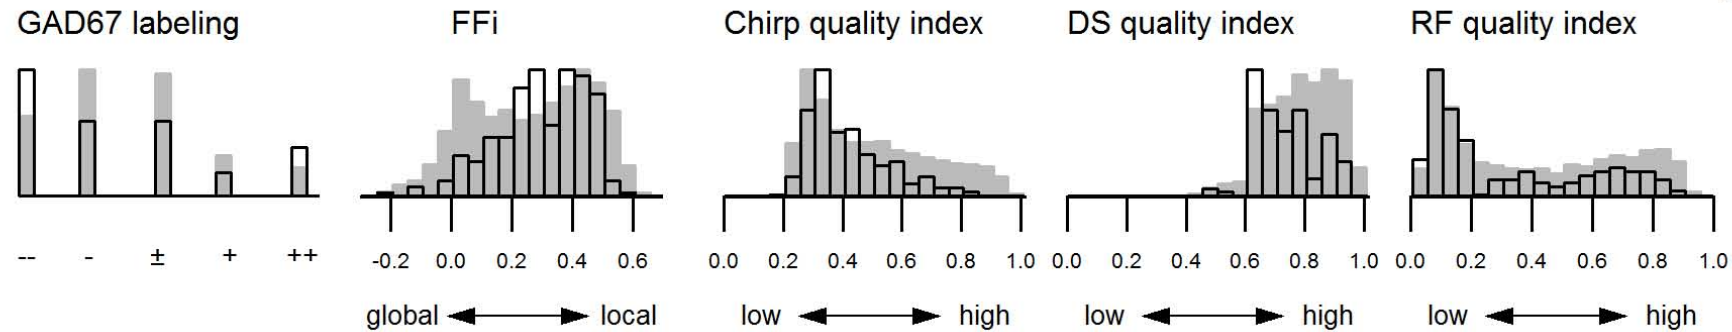

**d**

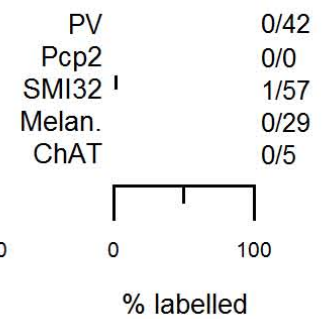

**Group 27 ON slow**

n = 152 Cells, 3.03%, (3.03% of RGCs); CF: 2.4

SFig. 4-28 a

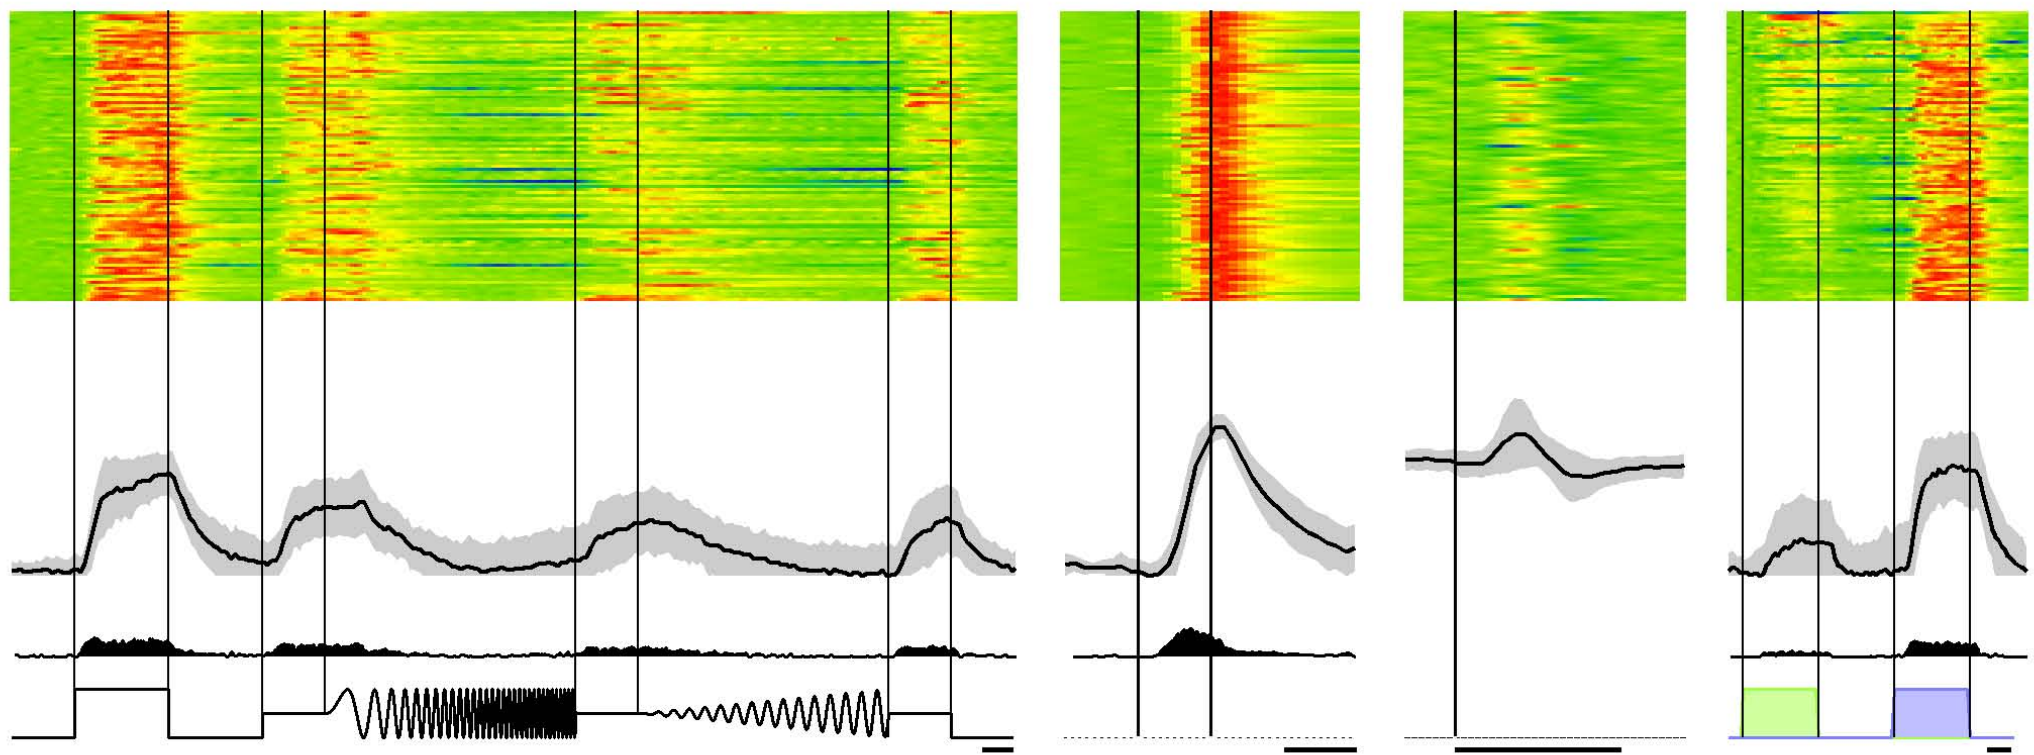

**b**

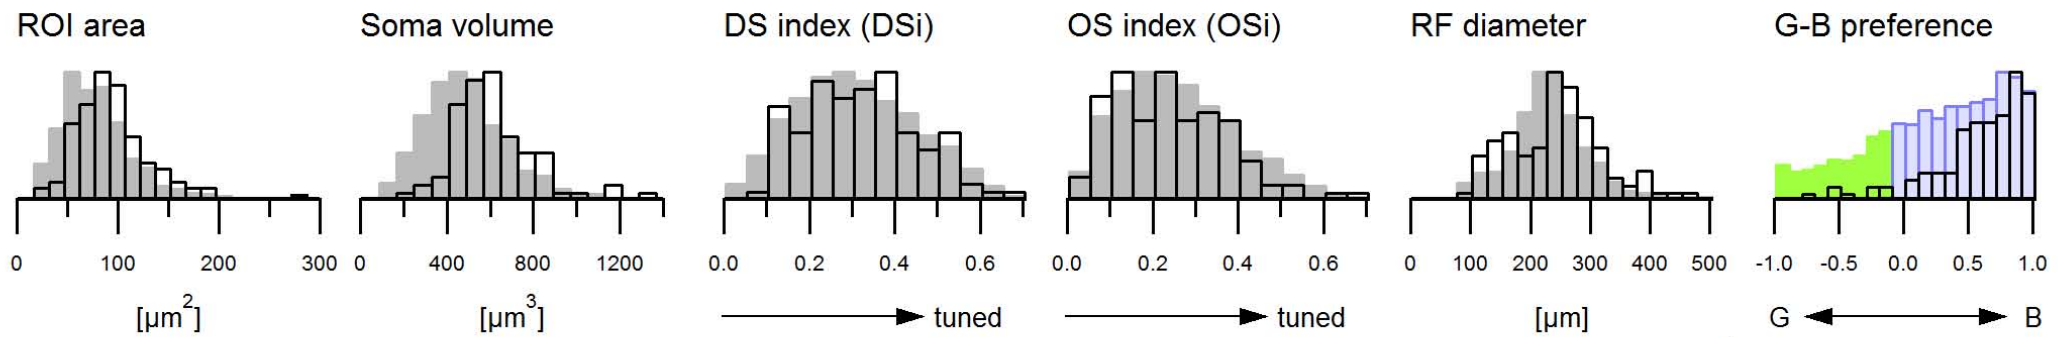

**c**

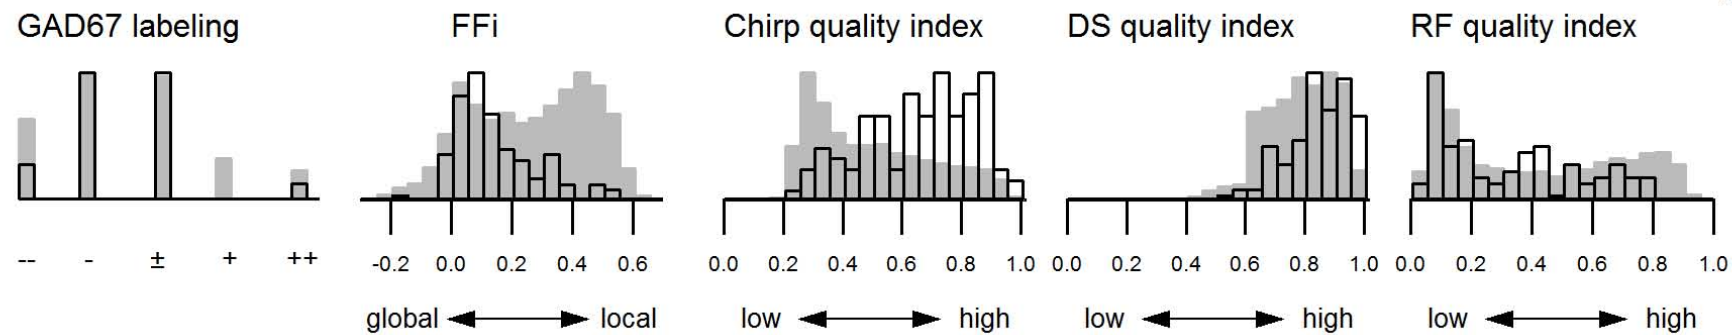

**d**

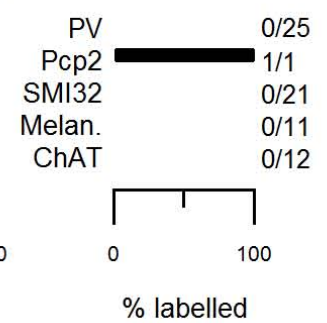

**Group 28** ON contrast suppr. (a,b)

n = 100 Cells, 1.99%, (1.99% of RGCs); CF: 2.27

SFig. 4-29 a

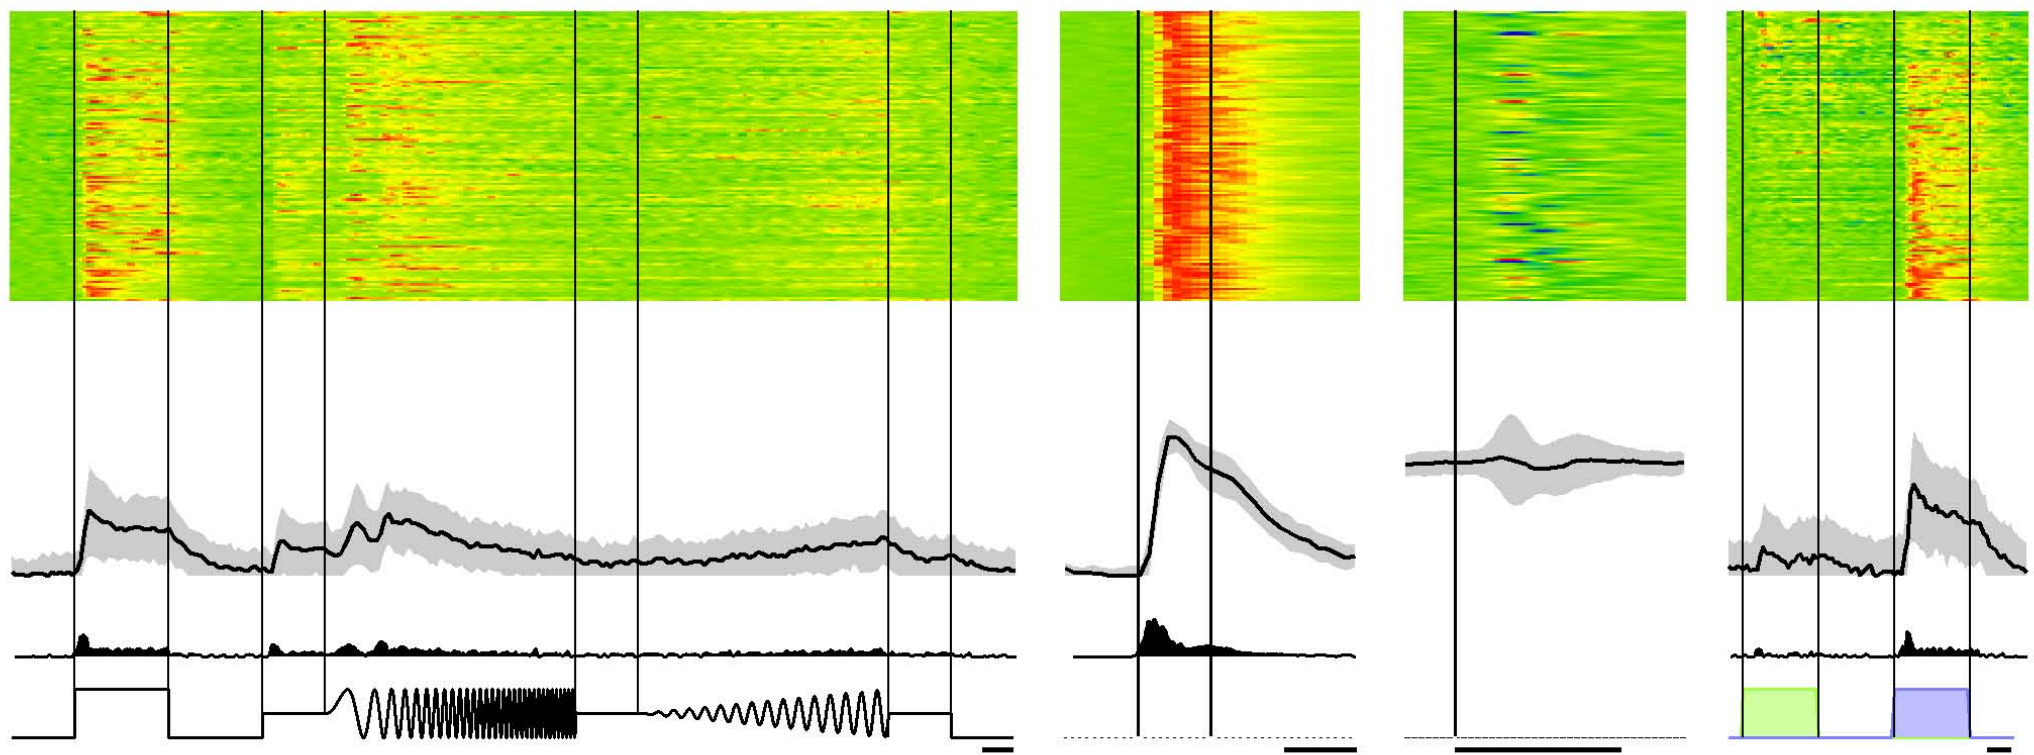

**b**

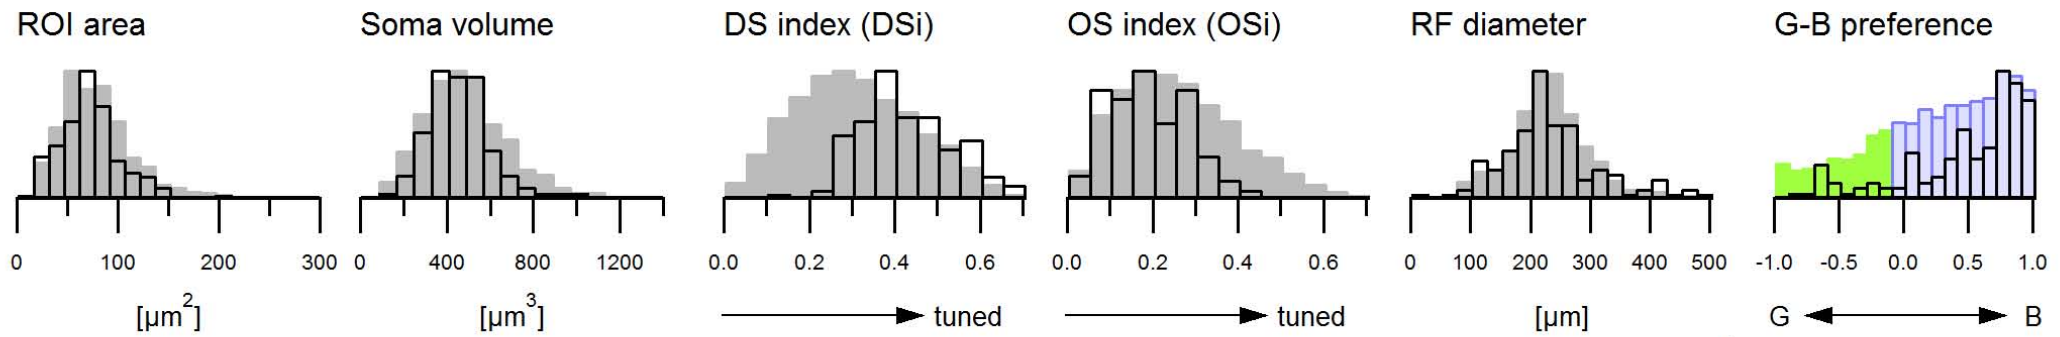

**c**

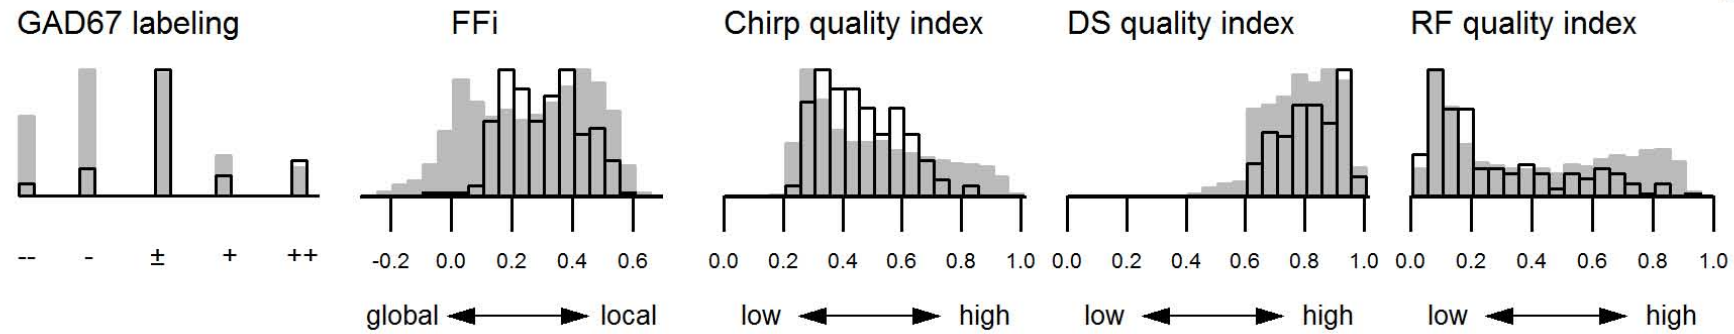

**d**

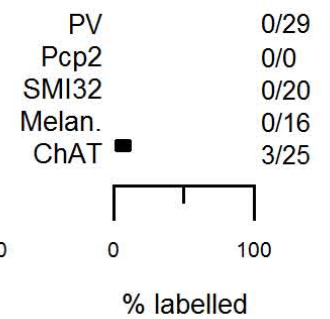

**Group 29 ON DS sust. 3**

n = 130 Cells, 2.59%, (2.59% of RGCs); CF: 2.34

SFig. 4-30 a

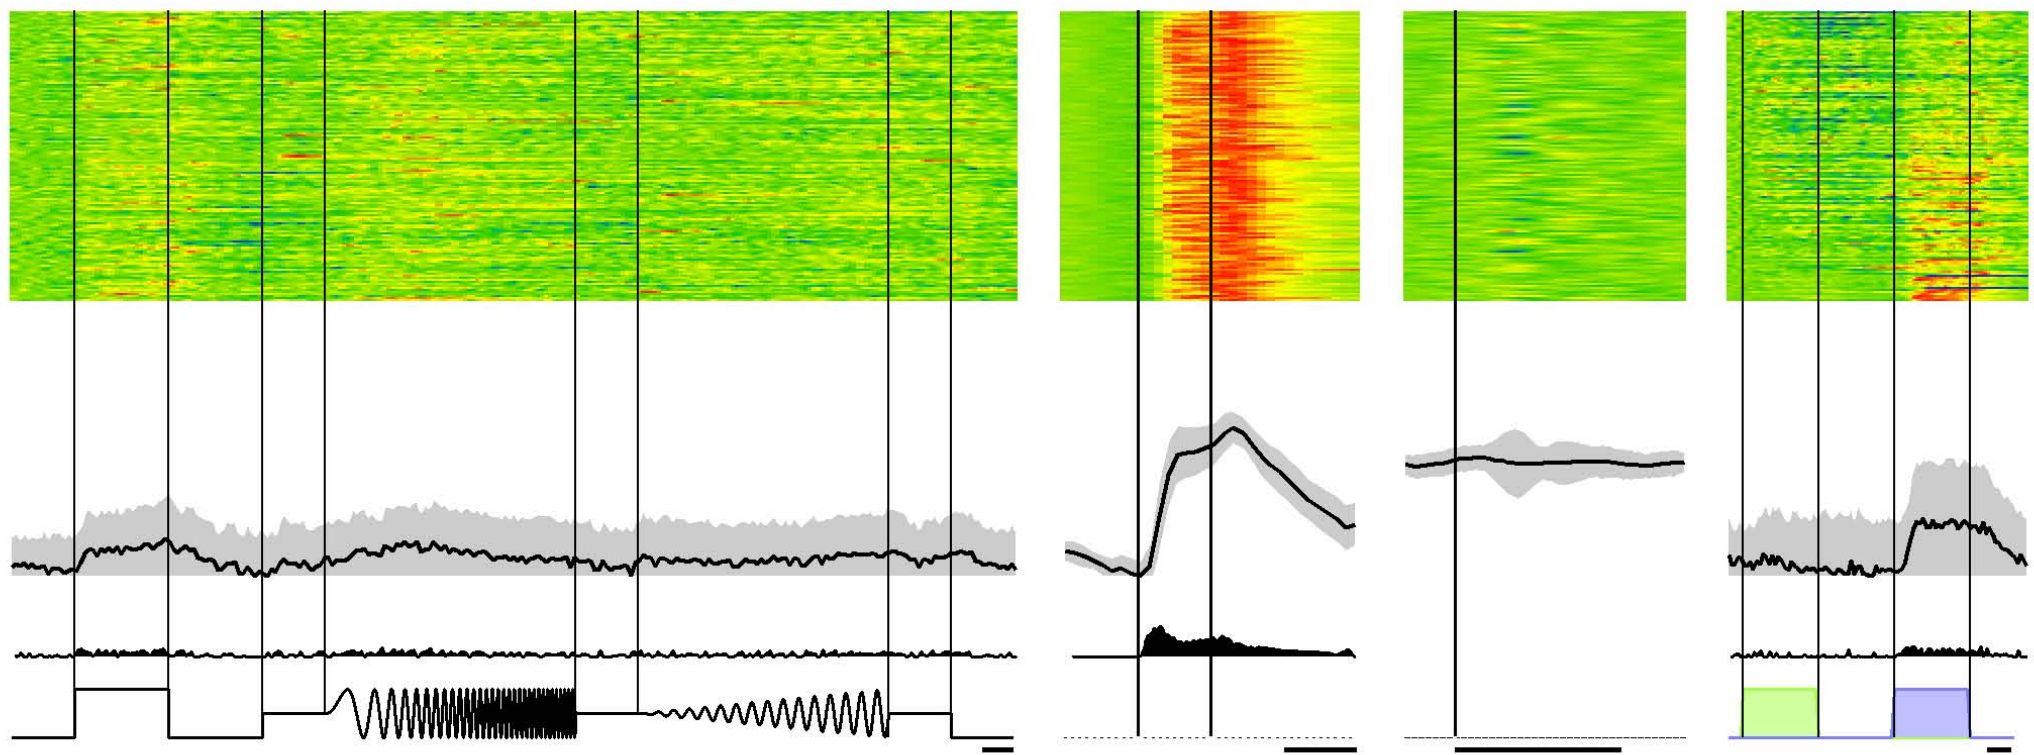

**b**

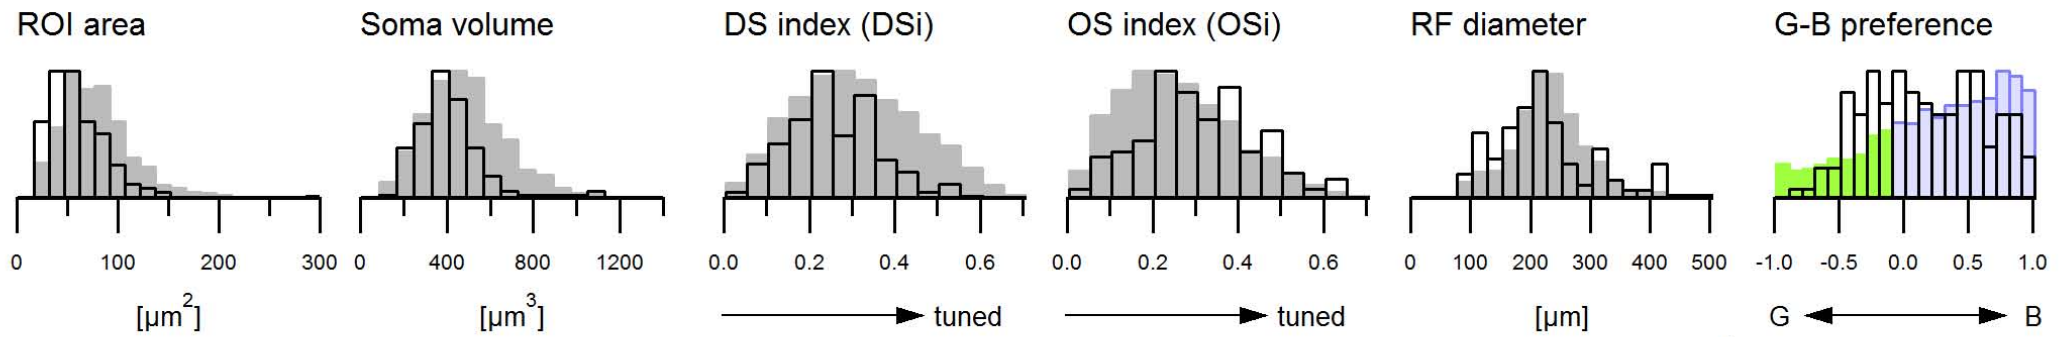

**c**

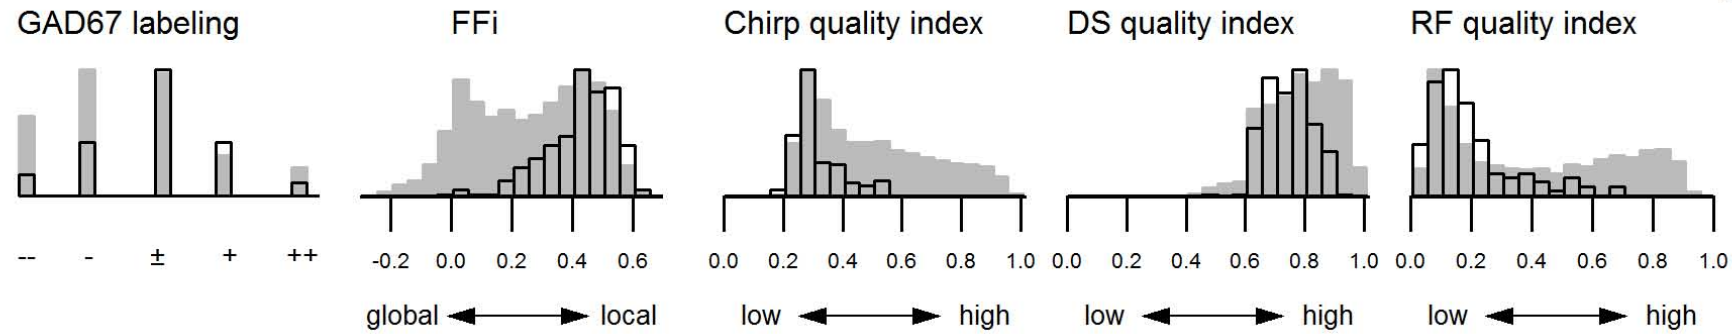

**d**

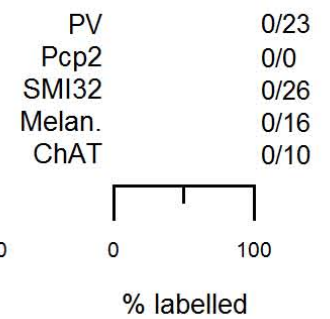

**Group 30** ON local sust., OS  
 n = 143 Cells, 2.85%, (2.85% of RGCs); CF: 2.43

SFig. 4-31 a

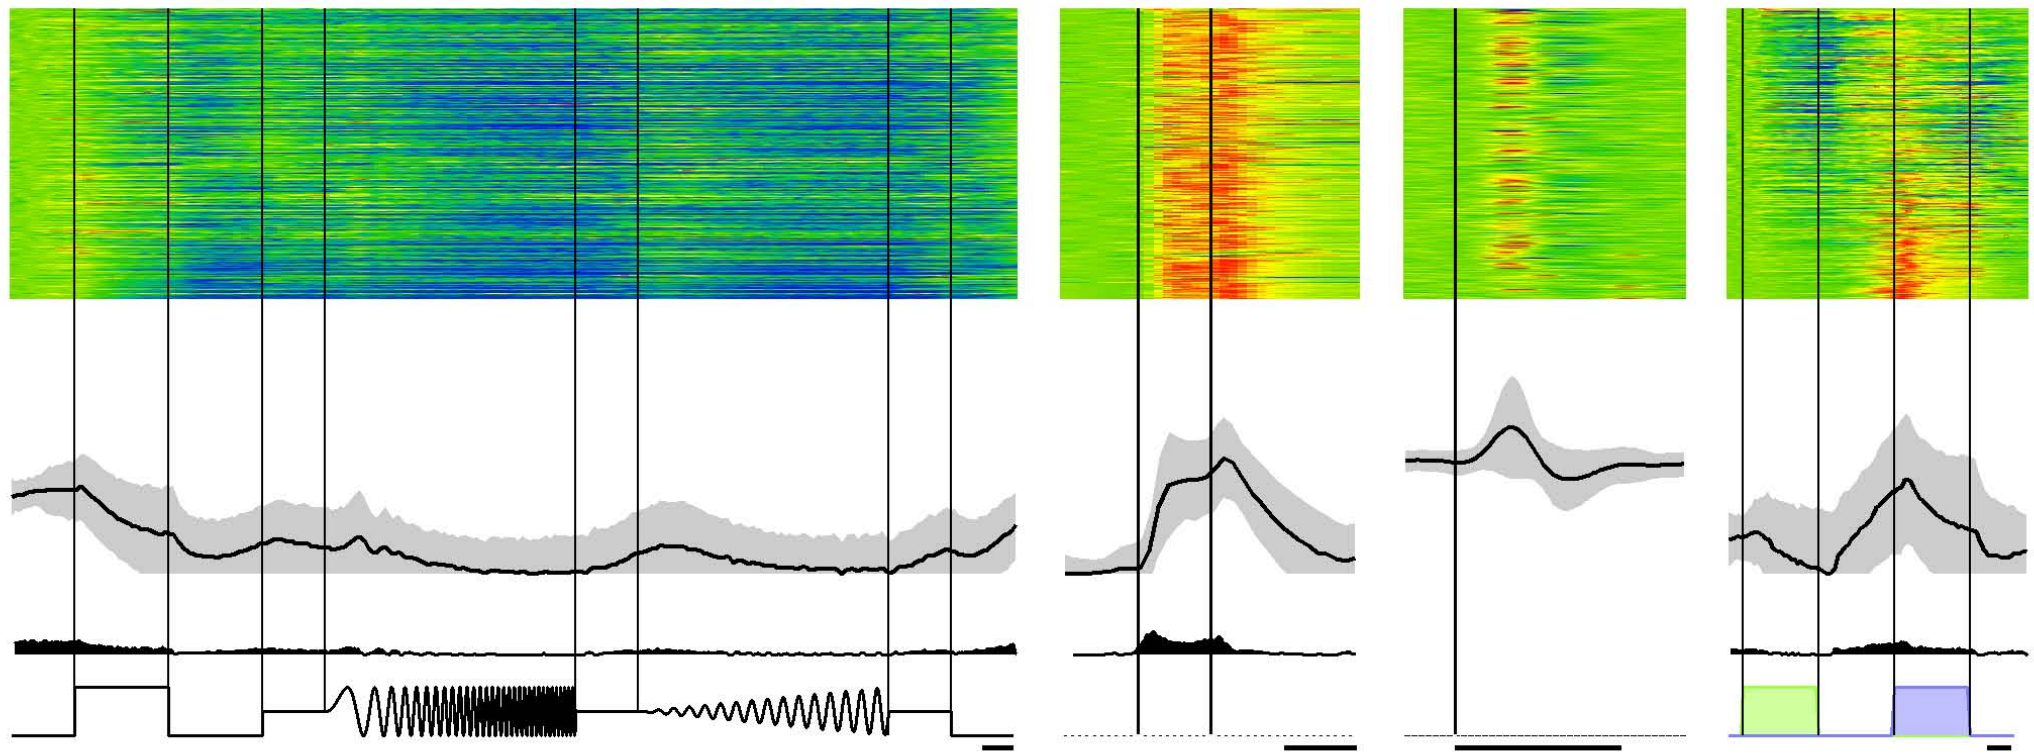

**b**

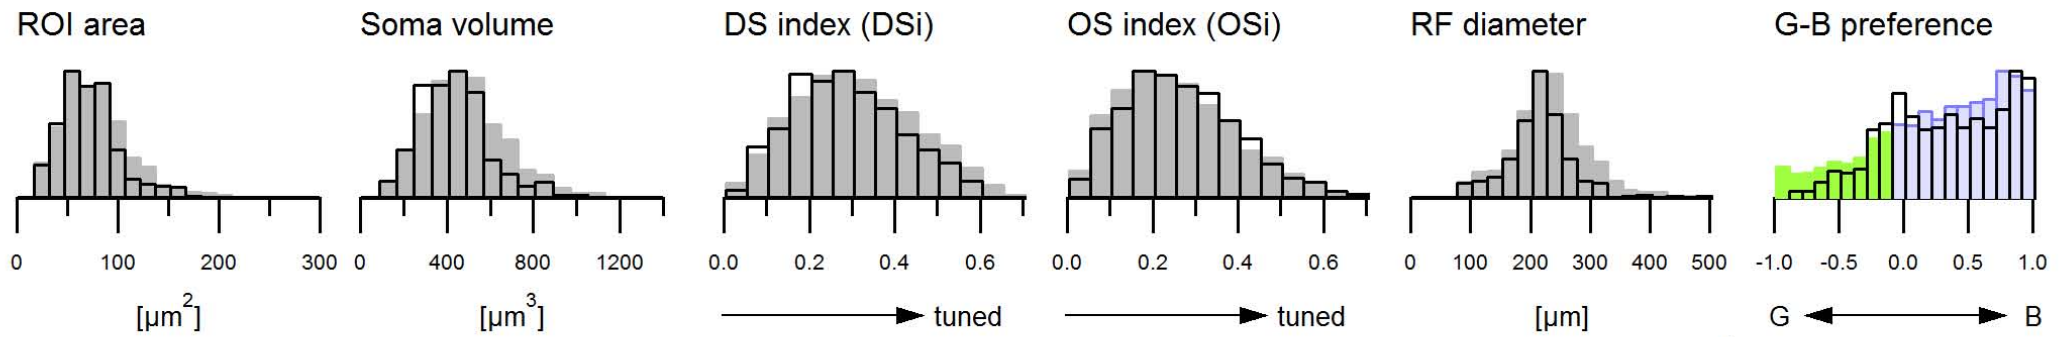

**c**

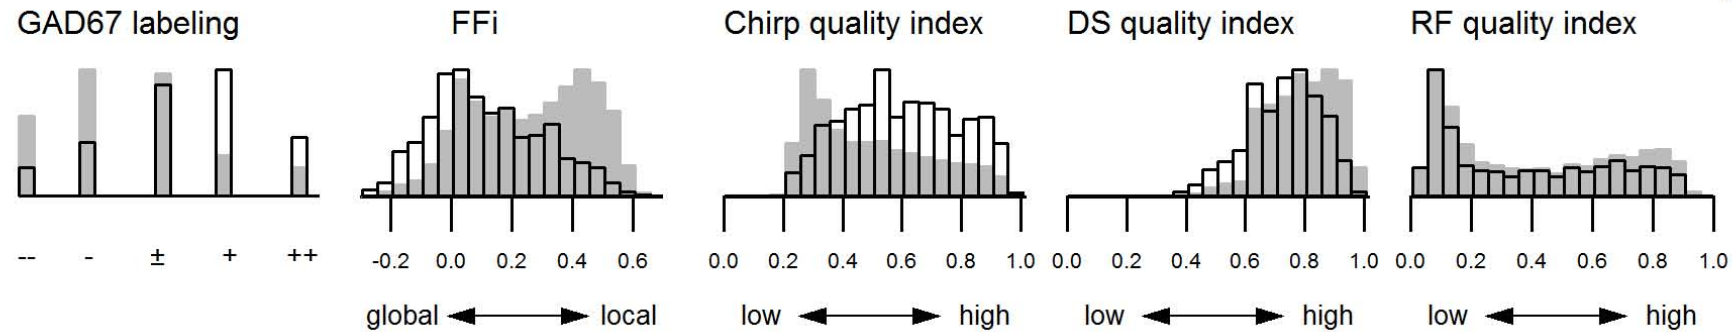

**d**

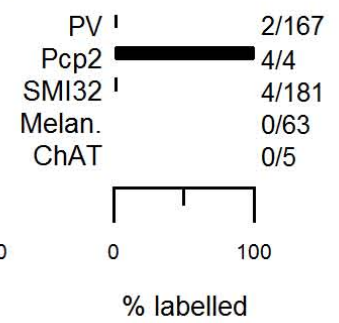

**Group 31 OFF suppr. 1 (a-e)**

n = 596 Cells, 11.86%, (11.86% of RGCs); CF: 9.4

SFig. 4-32 a

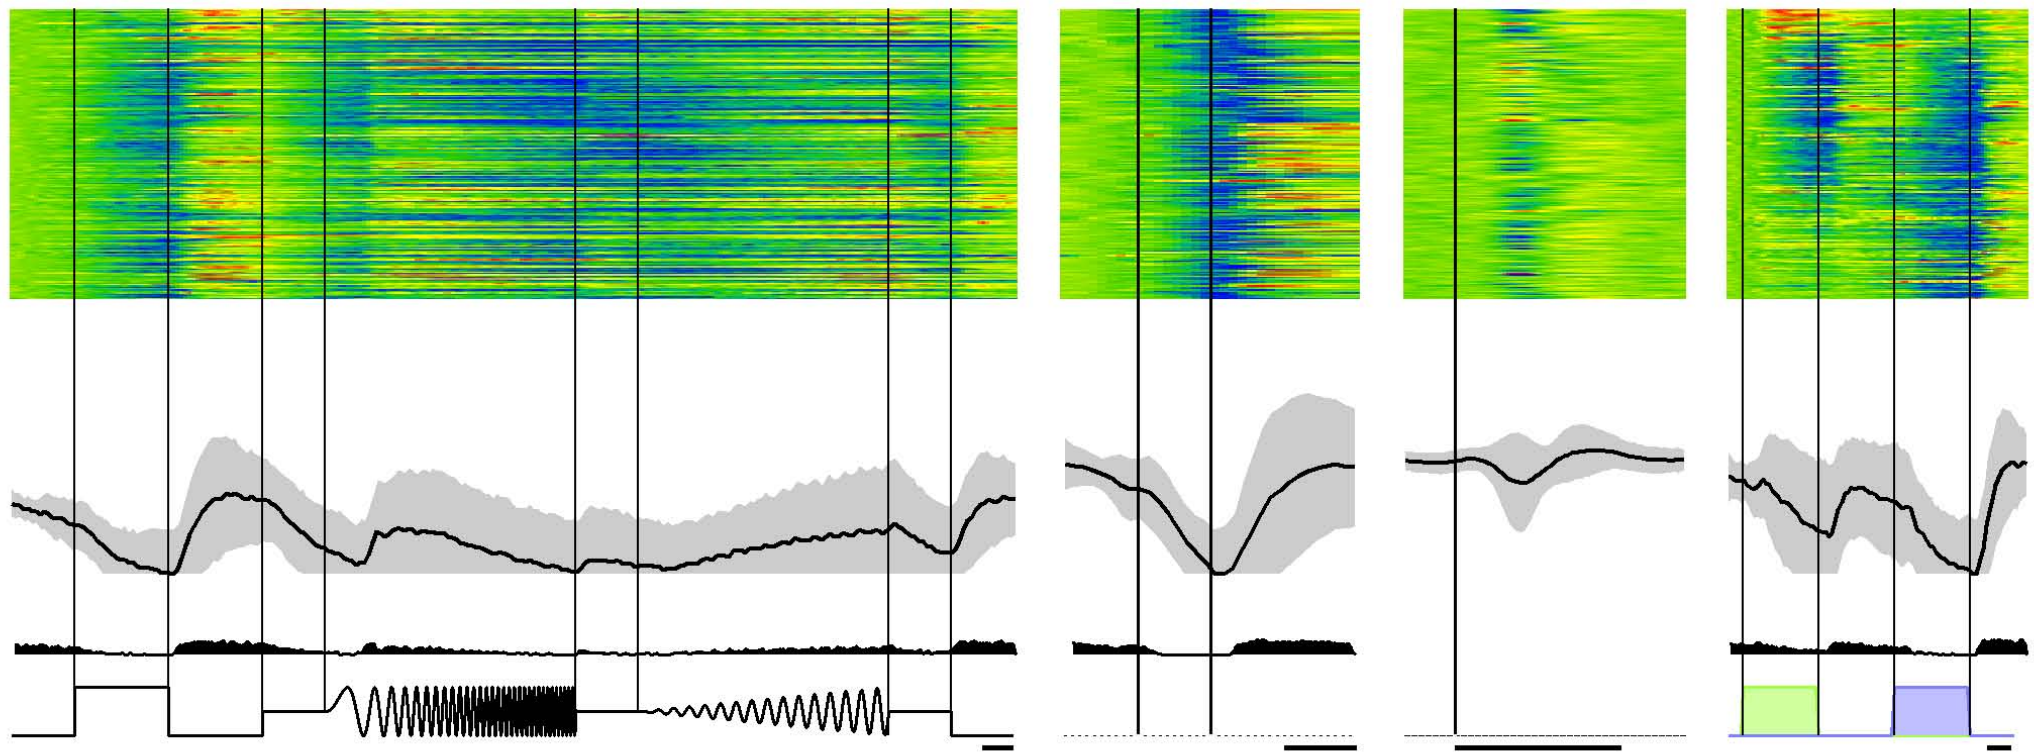

**b**

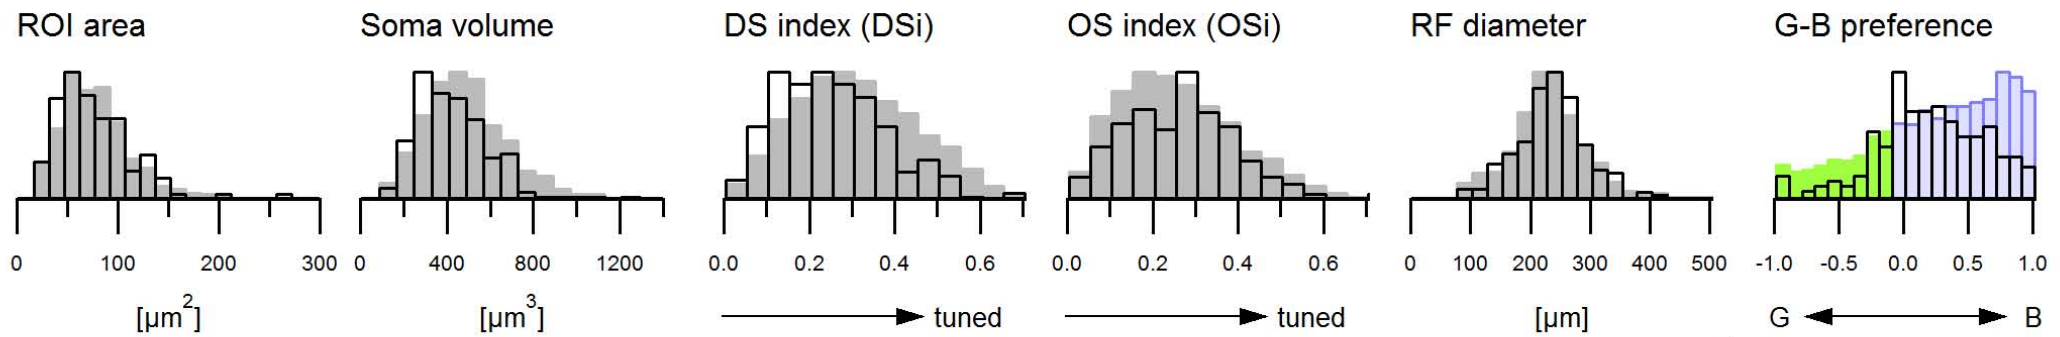

**c**

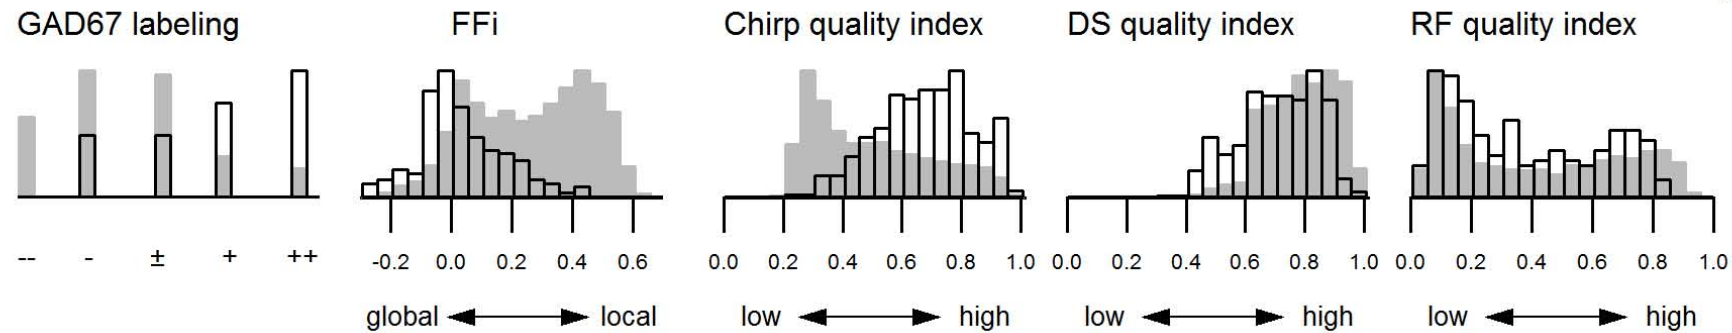

**d**

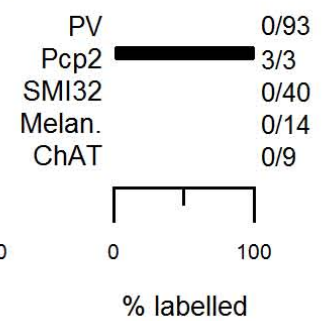

**Group 32 OFF suppr. 2 (a-c)**

n = 210 Cells, 4.18%, (4.18% of RGCs); CF: 4.1
